# Supplementary material for: An initial industrial flora: A framework for botanical research in cooperation with industry for biodiversity conservation
Source: PLoS One. 2020 Apr 1;15(4):e0230729. doi: 10.1371/journal.pone.0230729 (PMC7112212; doi:10.1371/journal.pone.0230729)
Supplement: S2 Table — The CF Study Number column represents the comparison flora number from S1 Table. (XLSX) [file pone.0230729.s002.xlsx]

## Sheet: Sheet1
Supplementary Information Table 2. Species identities from the 28 comparison floras with scientific names reconciled with the GBIF species matching tool. The CF Study Number column represents the comparison flora number from Supplementary Information Table 1.
CF Study Number	verbatimScientificName_from CF manuscripts	scientificName2	key	matchType	confidence	status	rank	kingdom	phylum	class	order	family	genus	GBIF-reconciled-name	GBIF-reconciled-name-with-authority
1	Acalypha gracilens A. Gray	Acalypha gracilens A.Gray	3056054	EXACT	100	ACCEPTED	SPECIES	Plantae	Tracheophyta	Magnoliopsida	Malpighiales	Euphorbiaceae	Acalypha	Acalypha gracilens	Acalypha gracilens A.Gray
1	Acalypha ostryaefolia Riddell	Acalypha ostryaefolia Riddell	3917515	EXACT	100	DOUBTFUL	SPECIES	Plantae	Tracheophyta	Magnoliopsida	Malpighiales	Euphorbiaceae	Acalypha	Acalypha ostryaefolia	Acalypha ostryaefolia Riddell
1	Acalypha rhomboidea Raf.	Acalypha rhomboidea Raf.	3056384	EXACT	100	SYNONYM	SPECIES	Plantae	Tracheophyta	Magnoliopsida	Malpighiales	Euphorbiaceae	Acalypha	Acalypha virginica	Acalypha virginica L.
1	Acer barbatum Michaux	Acer barbatum Michx.	3189871	EXACT	100	ACCEPTED	SPECIES	Plantae	Tracheophyta	Magnoliopsida	Sapindales	Sapindaceae	Acer	Acer barbatum	Acer barbatum Michx.
1	Acer leucoderme Small	Acer leucoderme Small	3189849	EXACT	100	ACCEPTED	SPECIES	Plantae	Tracheophyta	Magnoliopsida	Sapindales	Sapindaceae	Acer	Acer leucoderme	Acer leucoderme Small
1	Acer negundo L.	Acer negundo L.	3189866	EXACT	100	ACCEPTED	SPECIES	Plantae	Tracheophyta	Magnoliopsida	Sapindales	Sapindaceae	Acer	Acer negundo	Acer negundo L.
1	Acer rubrum L.	Acer rubrum L.	3189883	EXACT	100	ACCEPTED	SPECIES	Plantae	Tracheophyta	Magnoliopsida	Sapindales	Sapindaceae	Acer	Acer rubrum	Acer rubrum L.
1	Aesculus pavia L.	Aesculus pavia L.	3189807	EXACT	100	ACCEPTED	SPECIES	Plantae	Tracheophyta	Magnoliopsida	Sapindales	Sapindaceae	Aesculus	Aesculus pavia	Aesculus pavia L.
1	Aesculus sylvatica Bartram	Aesculus sylvatica W.Bartram	3189816	EXACT	100	ACCEPTED	SPECIES	Plantae	Tracheophyta	Magnoliopsida	Sapindales	Sapindaceae	Aesculus	Aesculus sylvatica	Aesculus sylvatica W.Bartram
1	Agalinis fasciculata (Elliott) Raf.	Agalinis fasciculata Raf.	3171266	EXACT	100	ACCEPTED	SPECIES	Plantae	Tracheophyta	Magnoliopsida	Lamiales	Orobanchaceae	Agalinis	Agalinis fasciculata	Agalinis fasciculata Raf.
1	Agalinis setacea (J. Gmelin) Raf.	Agalinis setacea Raf.	3171221	EXACT	100	ACCEPTED	SPECIES	Plantae	Tracheophyta	Magnoliopsida	Lamiales	Orobanchaceae	Agalinis	Agalinis setacea	Agalinis setacea Raf.
1	Manfreda virginica (L.) Rose	Manfreda virginica (L.) Salisb. ex Rose	2771744	EXACT	100	SYNONYM	SPECIES	Plantae	Tracheophyta	Liliopsida	Asparagales	Asparagaceae	Agave	Agave virginica	Agave virginica L.
1	Eupatorium rugosum Houttuyn	Eupatorium rugosum Houtt.	7654128	EXACT	100	SYNONYM	SPECIES	Plantae	Tracheophyta	Magnoliopsida	Asterales	Asteraceae	Ageratina	Ageratina altissima	Ageratina altissima (L.) R.M.King & H.Rob.
1	Eupatorium aromaticum L.	Eupatorium aromaticum L.	5400310	EXACT	100	SYNONYM	SPECIES	Plantae	Tracheophyta	Magnoliopsida	Asterales	Asteraceae	Ageratina	Ageratina aromatica	Ageratina aromatica Spach
1	Agrimonia pubescens Wallr.	Agrimonia pubescens Wallr.	3001959	EXACT	100	ACCEPTED	SPECIES	Plantae	Tracheophyta	Magnoliopsida	Rosales	Rosaceae	Agrimonia	Agrimonia pubescens	Agrimonia pubescens Wallr.
1	Ailanthus altissima (Miller) Swingle	Ailanthus altissima (Mill.) Swingle	3190653	EXACT	100	ACCEPTED	SPECIES	Plantae	Tracheophyta	Magnoliopsida	Sapindales	Simaroubaceae	Ailanthus	Ailanthus altissima	Ailanthus altissima (Mill.) Swingle
1	Albizia julibrissin Durazz.	Albizia julibrissin Durazz.	2972983	EXACT	100	ACCEPTED	SPECIES	Plantae	Tracheophyta	Magnoliopsida	Fabales	Fabaceae	Albizia	Albizia julibrissin	Albizia julibrissin Durazz.
1	Alisma subcordatum Raf.	Alisma subcordatum Raf.	2865181	EXACT	100	ACCEPTED	SPECIES	Plantae	Tracheophyta	Liliopsida	Alismatales	Alismataceae	Alisma	Alisma subcordatum	Alisma subcordatum Raf.
1	Allium canadense L.	Allium canadense L.	2855611	EXACT	100	ACCEPTED	SPECIES	Plantae	Tracheophyta	Liliopsida	Asparagales	Amaryllidaceae	Allium	Allium canadense	Allium canadense L.
1	Allium vineale L.	Allium vineale L.	7792960	EXACT	100	ACCEPTED	SPECIES	Plantae	Tracheophyta	Liliopsida	Asparagales	Amaryllidaceae	Allium	Allium vineale	Allium vineale L.
1	Alnus serrulata (Aiton) Willd.	Alnus serrulata Willd.	2876528	EXACT	100	ACCEPTED	SPECIES	Plantae	Tracheophyta	Magnoliopsida	Fagales	Betulaceae	Alnus	Alnus serrulata	Alnus serrulata Willd.
1	Alopecurus carolinianus Walter	Alopecurus carolinianus Walter	5290094	EXACT	100	ACCEPTED	SPECIES	Plantae	Tracheophyta	Liliopsida	Poales	Poaceae	Alopecurus	Alopecurus carolinianus	Alopecurus carolinianus Walter
1	Ambrosia artemisiifolia L.	Ambrosia artemisiifolia L.	8002952	EXACT	100	ACCEPTED	SPECIES	Plantae	Tracheophyta	Magnoliopsida	Asterales	Asteraceae	Ambrosia	Ambrosia artemisiifolia	Ambrosia artemisiifolia L.
1	Amelanchier arborea (Michaux f.) Fern.	Amelanchier arborea (Michx.f.) Fernald	3024052	EXACT	100	ACCEPTED	SPECIES	Plantae	Tracheophyta	Magnoliopsida	Rosales	Rosaceae	Amelanchier	Amelanchier arborea	Amelanchier arborea (Michx.f.) Fernald
1	Amianthium muscaetoxicum (Walter) Gray	Amianthium muscaetoxicum (Walter) A.Gray	3873811	EXACT	100	SYNONYM	SPECIES	Plantae	Tracheophyta	Liliopsida	Liliales	Melanthiaceae	Amianthium	Amianthium muscitoxicum	Amianthium muscitoxicum (Walter) A.Gray
1	Ampelopsis arborea (L.) Koehne	Ampelopsis arborea Koehne	3039184	EXACT	100	ACCEPTED	SPECIES	Plantae	Tracheophyta	Magnoliopsida	Vitales	Vitaceae	Ampelopsis	Ampelopsis arborea	Ampelopsis arborea Koehne
1	Amphicarpa bracteata (L.) Fern.	Amphicarpa bracteata (Linnaeus) Fernald	6069291	EXACT	100	SYNONYM	SPECIES	Plantae	Tracheophyta	Magnoliopsida	Fabales	Fabaceae	Amphicarpaea	Amphicarpaea bracteata	Amphicarpaea bracteata (L.) Fernald
1	Amsonia tabernaemontana Walter	Amsonia tabernaemontana Walter	3169689	EXACT	100	ACCEPTED	SPECIES	Plantae	Tracheophyta	Magnoliopsida	Gentianales	Apocynaceae	Amsonia	Amsonia tabernaemontana	Amsonia tabernaemontana Walter
1	Andropogon glomeratus (Walt.) B.S.P.	Andropogon glomeratus (Walter) Britton, Sterns & Poggenb.	2706097	EXACT	100	ACCEPTED	SPECIES	Plantae	Tracheophyta	Liliopsida	Poales	Poaceae	Andropogon	Andropogon glomeratus	Andropogon glomeratus (Walter) Britton, Sterns & Poggenb.
1	Andropogon ternarius Michaux	Andropogon ternarius Michx.	2706082	EXACT	100	ACCEPTED	SPECIES	Plantae	Tracheophyta	Liliopsida	Poales	Poaceae	Andropogon	Andropogon ternarius	Andropogon ternarius Michx.
1	Andropogon virginicus L.	Andropogon virginicus L.	2706080	EXACT	100	ACCEPTED	SPECIES	Plantae	Tracheophyta	Liliopsida	Poales	Poaceae	Andropogon	Andropogon virginicus	Andropogon virginicus L.
1	Anemone virginiana L.	Anemone virginiana L.	3033255	EXACT	100	ACCEPTED	SPECIES	Plantae	Tracheophyta	Magnoliopsida	Ranunculales	Ranunculaceae	Anemone	Anemone virginiana	Anemone virginiana L.
1	Angelica venenosa (Greenway) Fern.	Angelica venenosa (Greenway) Fernald	5371819	EXACT	100	ACCEPTED	SPECIES	Plantae	Tracheophyta	Magnoliopsida	Apiales	Apiaceae	Angelica	Angelica venenosa	Angelica venenosa (Greenway) Fernald
1	Anthoxanthum odoratum L.	Anthoxanthum odoratum L.	2705975	EXACT	100	ACCEPTED	SPECIES	Plantae	Tracheophyta	Liliopsida	Poales	Poaceae	Anthoxanthum	Anthoxanthum odoratum	Anthoxanthum odoratum L.
1	Orobanche uniflora L.	Orobanche uniflora L.	3173293	EXACT	100	SYNONYM	SPECIES	Plantae	Tracheophyta	Magnoliopsida	Lamiales	Orobanchaceae	Aphyllon	Aphyllon uniflorum	Aphyllon uniflorum A.Gray
1	Apios americana Medicus	Apios americana Medik.	2966796	EXACT	100	ACCEPTED	SPECIES	Plantae	Tracheophyta	Magnoliopsida	Fabales	Fabaceae	Apios	Apios americana	Apios americana Medik.
1	Arabidopsis thaliana (L.) Heynhold	Arabidopsis thaliana (L.) Heynh.	3052436	EXACT	100	ACCEPTED	SPECIES	Plantae	Tracheophyta	Magnoliopsida	Brassicales	Brassicaceae	Arabidopsis	Arabidopsis thaliana	Arabidopsis thaliana (L.) Heynh.
1	Aralia spinosa L.	Aralia spinosa L.	3036972	EXACT	100	ACCEPTED	SPECIES	Plantae	Tracheophyta	Magnoliopsida	Apiales	Araliaceae	Aralia	Aralia spinosa	Aralia spinosa L.
1	Arisaema triphyllum (L.) Schott	Arisaema triphyllum (L.) Schott	2867316	EXACT	100	ACCEPTED	SPECIES	Plantae	Tracheophyta	Liliopsida	Alismatales	Araceae	Arisaema	Arisaema triphyllum	Arisaema triphyllum (L.) Schott
1	Arthraxon hispidus (Thunb.) Makino var. cryptatherus (Hackel) Honda	Arthraxon hispidus var. cryptatherus (Hack.) Honda	5290204	EXACT	100	SYNONYM	VARIETY	Plantae	Tracheophyta	Liliopsida	Poales	Poaceae	Arthraxon	Arthraxon hispidus	Arthraxon hispidus (Thunb.) Makino
1	Arundinaria gigantea (Walter) Muhl.	Arundinaria gigantea (Walter) Muhl.	2705964	EXACT	100	ACCEPTED	SPECIES	Plantae	Tracheophyta	Liliopsida	Poales	Poaceae	Arundinaria	Arundinaria gigantea	Arundinaria gigantea (Walter) Muhl.
1	Asclepias amplexicaulis Smith	Asclepias amplexicaulis Sm.	3170332	EXACT	100	ACCEPTED	SPECIES	Plantae	Tracheophyta	Magnoliopsida	Gentianales	Apocynaceae	Asclepias	Asclepias amplexicaulis	Asclepias amplexicaulis Sm.
1	Asclepias tuberosa L.	Asclepias tuberosa L.	3170305	EXACT	100	ACCEPTED	SPECIES	Plantae	Tracheophyta	Magnoliopsida	Gentianales	Apocynaceae	Asclepias	Asclepias tuberosa	Asclepias tuberosa L.
1	Asclepias variegata L.	Asclepias variegata L.	3170272	EXACT	100	ACCEPTED	SPECIES	Plantae	Tracheophyta	Magnoliopsida	Gentianales	Apocynaceae	Asclepias	Asclepias variegata	Asclepias variegata L.
1	Polygala grandifolia Walter	Polygala grandiflora Walt.	3191422	FUZZY	96	SYNONYM	SPECIES	Plantae	Tracheophyta	Magnoliopsida	Fabales	Polygalaceae	Asemeia	Asemeia grandiflora	Asemeia grandiflora (Walter) Small
1	Asimina parviflora (Michaux) Dunal	Asimina parviflora Dunal	3158051	EXACT	100	ACCEPTED	SPECIES	Plantae	Tracheophyta	Magnoliopsida	Magnoliales	Annonaceae	Asimina	Asimina parviflora	Asimina parviflora Dunal
1	Asplenium platyneuron (L.) Oakes	Asplenium platyneuron (L.) Oakes	8010341	EXACT	100	SYNONYM	SPECIES	Plantae	Tracheophyta	Polypodiopsida	Polypodiales	Aspleniaceae	Asplenium	Asplenium platyneuron	Asplenium platyneuron (L.) Britton, Sterns & Poggenb.
1	Athyrium filix-femina (L.) Roth var. asplenioides (Michaux) Farwell	Athyrium filix-femina var. asplenioides (Michx.) Farw.	5643872	EXACT	100	SYNONYM	VARIETY	Plantae	Tracheophyta	Polypodiopsida	Polypodiales	Athyriaceae	Athyrium	Athyrium asplenioides	Athyrium asplenioides (Michx.) Desv.
1	Aureolaria virginica (L.) Pennell	Aureolaria virginica Pennell	3170773	EXACT	100	ACCEPTED	SPECIES	Plantae	Tracheophyta	Magnoliopsida	Lamiales	Orobanchaceae	Aureolaria	Aureolaria virginica	Aureolaria virginica Pennell
1	Baccharis halimifolia L.	Baccharis halimifolia L.	3129663	EXACT	100	ACCEPTED	SPECIES	Plantae	Tracheophyta	Magnoliopsida	Asterales	Asteraceae	Baccharis	Baccharis halimifolia	Baccharis halimifolia L.
1	Betula nigra L.	Betula nigra L.	5331532	EXACT	100	ACCEPTED	SPECIES	Plantae	Tracheophyta	Magnoliopsida	Fagales	Betulaceae	Betula	Betula nigra	Betula nigra L.
1	Bidens bipinnata L.	Bidens bipinnata L.	5389402	EXACT	100	ACCEPTED	SPECIES	Plantae	Tracheophyta	Magnoliopsida	Asterales	Asteraceae	Bidens	Bidens bipinnata	Bidens bipinnata L.
1	Bidens discoidea (Torr. & Gray) Britton	Bidens discoidea Britton	5391837	EXACT	100	ACCEPTED	SPECIES	Plantae	Tracheophyta	Magnoliopsida	Asterales	Asteraceae	Bidens	Bidens discoidea	Bidens discoidea Britton
1	Bidens frondosa L.	Bidens frondosa L.	5392174	EXACT	100	ACCEPTED	SPECIES	Plantae	Tracheophyta	Magnoliopsida	Asterales	Asteraceae	Bidens	Bidens frondosa	Bidens frondosa L.
1	Bignonia capreolata L.	Bignonia capreolata L.	3172516	EXACT	100	ACCEPTED	SPECIES	Plantae	Tracheophyta	Magnoliopsida	Lamiales	Bignoniaceae	Bignonia	Bignonia capreolata	Bignonia capreolata L.
1	Boehmeria cylindrica (L.) Swartz	Boehmeria cylindrica (L.) Sw.	2984345	EXACT	100	ACCEPTED	SPECIES	Plantae	Tracheophyta	Magnoliopsida	Rosales	Urticaceae	Boehmeria	Boehmeria cylindrica	Boehmeria cylindrica (L.) Sw.
1	Botrychium virginianum (L.) Swartz	Botrychium virginianum (L.) Sw.	2650159	EXACT	100	SYNONYM	SPECIES	Plantae	Tracheophyta	Polypodiopsida	Ophioglossales	Ophioglossaceae	Botrypus	Botrypus virginianus	Botrypus virginianus (L.) Michx.
1	Kuhnia eupatorioides L.	Kuhnia eupatorioides L.	5388440	EXACT	100	SYNONYM	SPECIES	Plantae	Tracheophyta	Magnoliopsida	Asterales	Asteraceae	Brickellia	Brickellia eupatorioides	Brickellia eupatorioides (L.) Shinners
1	Briza minor L.	Briza minor L.	2702793	EXACT	100	ACCEPTED	SPECIES	Plantae	Tracheophyta	Liliopsida	Poales	Poaceae	Briza	Briza minor	Briza minor L.
1	Bromus japonicus Thunberg	Bromus japonicus Thunb.	2703735	EXACT	100	SYNONYM	SPECIES	Plantae	Tracheophyta	Liliopsida	Poales	Poaceae	Bromus	Bromus japonicus	Bromus japonicus Houtt.
1	Bromus purgans L.	Bromus purgans L.	2703645	EXACT	100	SYNONYM	SPECIES	Plantae	Tracheophyta	Liliopsida	Poales	Poaceae	Bromus	Bromus kalmii	Bromus kalmii A.Gray
1	Callicarpa americana L.	Callicarpa americana L.	5341129	EXACT	100	ACCEPTED	SPECIES	Plantae	Tracheophyta	Magnoliopsida	Lamiales	Lamiaceae	Callicarpa	Callicarpa americana	Callicarpa americana L.
1	Calycanthus floridus L.	Calycanthus floridus L.	3034113	EXACT	100	ACCEPTED	SPECIES	Plantae	Tracheophyta	Magnoliopsida	Laurales	Calycanthaceae	Calycanthus	Calycanthus floridus	Calycanthus floridus L.
1	Campsis radicans (L.) Seemann	Campsis radicans (L.) Seem.	7613490	EXACT	100	ACCEPTED	SPECIES	Plantae	Tracheophyta	Magnoliopsida	Lamiales	Bignoniaceae	Campsis	Campsis radicans	Campsis radicans (L.) Seem.
1	Capsella bursa-pastoris (L.) Medicus	Capsella bursa-pastoris (L.) Medik.	5375388	EXACT	100	ACCEPTED	SPECIES	Plantae	Tracheophyta	Magnoliopsida	Brassicales	Brassicaceae	Capsella	Capsella bursa-pastoris	Capsella bursa-pastoris (L.) Medik.
1	Cardamine diphylla (Michaux) Alph. Wood	Cardamine diphylla (Michx.) Alph.Wood	3045717	EXACT	100	ACCEPTED	SPECIES	Plantae	Tracheophyta	Magnoliopsida	Brassicales	Brassicaceae	Cardamine	Cardamine diphylla	Cardamine diphylla (Michx.) Alph.Wood
1	Cardamine hirsuta L.	Cardamine hirsuta L.	3046258	EXACT	100	ACCEPTED	SPECIES	Plantae	Tracheophyta	Magnoliopsida	Brassicales	Brassicaceae	Cardamine	Cardamine hirsuta	Cardamine hirsuta L.
1	Carex artitecta Mackenzie	Carex artitecta Mack.	2725467	EXACT	100	SYNONYM	SPECIES	Plantae	Tracheophyta	Liliopsida	Poales	Cyperaceae	Carex	Carex albicans	Carex albicans Willd. ex Spreng.
1	Carex albolutescens Schweinitz	Carex albolutescens Schwein.	2723628	EXACT	100	ACCEPTED	SPECIES	Plantae	Tracheophyta	Liliopsida	Poales	Cyperaceae	Carex	Carex albolutescens	Carex albolutescens Schwein.
1	Carex atlantica Bailey var. atlantica	Carex atlantica var. atlantica	7505105	EXACT	98	SYNONYM	VARIETY	Plantae	Tracheophyta	Liliopsida	Poales	Cyperaceae	Carex	Carex atlantica	Carex atlantica L.H.Bailey
1	Carex atlantica Bailey var. capillacea (Bailey) Reznicek	Carex atlantica var. capillacea (L.H.Bailey) Reznicek	6311345	EXACT	100	SYNONYM	VARIETY	Plantae	Tracheophyta	Liliopsida	Poales	Cyperaceae	Carex	Carex atlantica	Carex atlantica L.H.Bailey
1	Carex cephalophora Willd.	Carex cephalophora Muhl. ex Willd.	2724783	EXACT	100	ACCEPTED	SPECIES	Plantae	Tracheophyta	Liliopsida	Poales	Cyperaceae	Carex	Carex cephalophora	Carex cephalophora Muhl. ex Willd.
1	Carex crinita Lam. var. brevicrinis Fern.	Carex crinita var. brevicrinis Fernald	2725903	EXACT	100	ACCEPTED	VARIETY	Plantae	Tracheophyta	Liliopsida	Poales	Cyperaceae	Carex	Carex crinita	Carex crinita Lam.
1	Carex crinita Lam. var. crinita	Carex crinita var. crinita	7227182	EXACT	98	ACCEPTED	VARIETY	Plantae	Tracheophyta	Liliopsida	Poales	Cyperaceae	Carex	Carex crinita	Carex crinita Lam.
1	Carex frankii Kunth	Carex frankii Kunth	2722536	EXACT	100	ACCEPTED	SPECIES	Plantae	Tracheophyta	Liliopsida	Poales	Cyperaceae	Carex	Carex frankii	Carex frankii Kunth
1	Carex laevivaginata (Kuk.) Mackenzie M	Carex laevivaginata (K√ºk.) Mackenzie	8387084	EXACT	100	ACCEPTED	SPECIES	Plantae	Tracheophyta	Liliopsida	Poales	Cyperaceae	Carex	Carex laevivaginata	Carex laevivaginata (K√ºk.) Mackenzie
1	Carex laxiflora Lam.	Carex laxiflora Lam.	2724466	EXACT	100	ACCEPTED	SPECIES	Plantae	Tracheophyta	Liliopsida	Poales	Cyperaceae	Carex	Carex laxiflora	Carex laxiflora Lam.
1	Carex lupulina Muhl. ex Schkuhr.	Carex lupulina Muhl. ex Schkuhr	7368071	EXACT	100	DOUBTFUL	SPECIES	Plantae	Tracheophyta	Liliopsida	Poales	Cyperaceae	Carex	Carex lupulina	Carex lupulina Muhl. ex Willd.
1	Carex lurida Wahlenberg	Carex lurida Wahlenb.	2722529	EXACT	100	ACCEPTED	SPECIES	Plantae	Tracheophyta	Liliopsida	Poales	Cyperaceae	Carex	Carex lurida	Carex lurida Wahlenb.
1	Carex mitchelliana M.A. Curtis M	Carex mitchelliana M.A.Curtis	2726457	EXACT	100	ACCEPTED	SPECIES	Plantae	Tracheophyta	Liliopsida	Poales	Cyperaceae	Carex	Carex mitchelliana	Carex mitchelliana M.A.Curtis
1	Carex rosea Willd.	Carex rosea Willd.	2727476	EXACT	100	ACCEPTED	SPECIES	Plantae	Tracheophyta	Liliopsida	Poales	Cyperaceae	Carex	Carex rosea	Carex rosea Willd.
1	Carex striatula Michaux	Carex striatula Michx.	2722475	EXACT	100	ACCEPTED	SPECIES	Plantae	Tracheophyta	Liliopsida	Poales	Cyperaceae	Carex	Carex striatula	Carex striatula Michx.
1	Carpinus caroliniana Walter	Carpinus caroliniana Walter	2875842	EXACT	100	ACCEPTED	SPECIES	Plantae	Tracheophyta	Magnoliopsida	Fagales	Betulaceae	Carpinus	Carpinus caroliniana	Carpinus caroliniana Walter
1	Carya tomentosa (Poiret) Nutt.	Carya tomentosa (Lam.) Nutt.	3054304	EXACT	99	SYNONYM	SPECIES	Plantae	Tracheophyta	Magnoliopsida	Fagales	Juglandaceae	Carya	Carya alba	Carya alba (L.) Nutt.
1	Carya cordiformis (Wangenh.) K. Koch	Carya cordiformis (Wangenh.) K.Koch	3054299	EXACT	100	SYNONYM	SPECIES	Plantae	Tracheophyta	Magnoliopsida	Fagales	Juglandaceae	Carya	Carya cordiformis	Carya cordiformis (Wangenh.) C.Koch
1	Carya glabra (Miller) Sweet	Carya glabra (Mill.) Sweet	3054325	EXACT	100	ACCEPTED	SPECIES	Plantae	Tracheophyta	Magnoliopsida	Fagales	Juglandaceae	Carya	Carya glabra	Carya glabra (Mill.) Sweet
1	Carya illinoensis (Wangenh.) K. Koch	Carya illinoensis (Wangenh.) K.Koch, 1869	4205617	EXACT	100	SYNONYM	SPECIES	Plantae	Tracheophyta	Magnoliopsida	Fagales	Juglandaceae	Carya	Carya illinoiensis	Carya illinoiensis (Wangenh.) K.Koch
1	Carya ovalis (Wangenh.) Sarg.	Carya ovalis (Wangenh.) Sarg.	3054334	EXACT	100	ACCEPTED	SPECIES	Plantae	Tracheophyta	Magnoliopsida	Fagales	Juglandaceae	Carya	Carya ovalis	Carya ovalis (Wangenh.) Sarg.
1	Carya ovata (Miller) K. Koch	Carya ovata K.Koch	3054296	EXACT	100	ACCEPTED	SPECIES	Plantae	Tracheophyta	Magnoliopsida	Fagales	Juglandaceae	Carya	Carya ovata	Carya ovata K.Koch
1	Castanea dentata (Marshall) Borkh.	Castanea dentata Borkh.	5333230	EXACT	100	ACCEPTED	SPECIES	Plantae	Tracheophyta	Magnoliopsida	Fagales	Fagaceae	Castanea	Castanea dentata	Castanea dentata Borkh.
1	Castanea pumila (L.) Miller	Castanea pumila (L.) Mill.	5333212	EXACT	100	ACCEPTED	SPECIES	Plantae	Tracheophyta	Magnoliopsida	Fagales	Fagaceae	Castanea	Castanea pumila	Castanea pumila (L.) Mill.
1	Catalpa speciosa Warder ex Engelm.	Catalpa speciosa Warder ex Engelm.	3172612	EXACT	100	ACCEPTED	SPECIES	Plantae	Tracheophyta	Magnoliopsida	Lamiales	Bignoniaceae	Catalpa	Catalpa speciosa	Catalpa speciosa Warder ex Engelm.
1	Ceanothus americanus L.	Ceanothus americanus L.	3039318	EXACT	100	ACCEPTED	SPECIES	Plantae	Tracheophyta	Magnoliopsida	Rosales	Rhamnaceae	Ceanothus	Ceanothus americanus	Ceanothus americanus L.
1	Celastrus orbiculatus Thunb.	Celastrus orbiculatus Thunb.	3169169	EXACT	100	SYNONYM	SPECIES	Plantae	Tracheophyta	Magnoliopsida	Celastrales	Celastraceae	Celastrus	Celastrus orbiculatus	Celastrus orbiculatus C.P.Thunberg ex A.Murray
1	Celtis laevigata Willd.	Celtis laevigata Willd.	2984491	EXACT	100	ACCEPTED	SPECIES	Plantae	Tracheophyta	Magnoliopsida	Rosales	Cannabaceae	Celtis	Celtis laevigata	Celtis laevigata Willd.
1	Celtis tenuifolia Nutt.	Celtis tenuifolia Nutt.	2984482	EXACT	100	ACCEPTED	SPECIES	Plantae	Tracheophyta	Magnoliopsida	Rosales	Cannabaceae	Celtis	Celtis tenuifolia	Celtis tenuifolia Nutt.
1	Centrosema virginianum (L.) Bentham	Centrosema virginianum (L.) Benth.	2964906	EXACT	100	ACCEPTED	SPECIES	Plantae	Tracheophyta	Magnoliopsida	Fabales	Fabaceae	Centrosema	Centrosema virginianum	Centrosema virginianum (L.) Benth.
1	Cephalanthus occidentalis L.	Cephalanthus occidentalis L.	2923947	EXACT	100	ACCEPTED	SPECIES	Plantae	Tracheophyta	Magnoliopsida	Gentianales	Rubiaceae	Cephalanthus	Cephalanthus occidentalis	Cephalanthus occidentalis L.
1	Cerastium glomeratum Thuillier	Cerastium glomeratum Thuill.	3085440	EXACT	100	ACCEPTED	SPECIES	Plantae	Tracheophyta	Magnoliopsida	Caryophyllales	Caryophyllaceae	Cerastium	Cerastium glomeratum	Cerastium glomeratum Thuill.
1	Cercis canadensis L.	Cercis canadensis L.	5353583	EXACT	100	ACCEPTED	SPECIES	Plantae	Tracheophyta	Magnoliopsida	Fabales	Fabaceae	Cercis	Cercis canadensis	Cercis canadensis L.
1	Chaerophyllum tainturieri Hooker	Chaerophyllum tainturieri Hook.	3034651	EXACT	100	ACCEPTED	SPECIES	Plantae	Tracheophyta	Magnoliopsida	Apiales	Apiaceae	Chaerophyllum	Chaerophyllum tainturieri	Chaerophyllum tainturieri Hook.
1	Cassia fasciculata Michaux	Cassia fasciculata Michx.	5351287	EXACT	100	SYNONYM	SPECIES	Plantae	Tracheophyta	Magnoliopsida	Fabales	Fabaceae	Chamaecrista	Chamaecrista fasciculata	Chamaecrista fasciculata (Michx.) Greene
1	Cassia nictitans L.	Cassia nictitans L.	8206052	EXACT	100	SYNONYM	SPECIES	Plantae	Tracheophyta	Magnoliopsida	Fabales	Fabaceae	Chamaecrista	Chamaecrista nictitans	Chamaecrista nictitans Moench
1	Chasmanthium latifolium (Michaux) Yates	Chasmanthium latifolium (Michx.) H.O.Yates	2703077	EXACT	100	ACCEPTED	SPECIES	Plantae	Tracheophyta	Liliopsida	Poales	Poaceae	Chasmanthium	Chasmanthium latifolium	Chasmanthium latifolium (Michx.) H.O.Yates
1	Chasmanthium laxum (L.) Yates	Chasmanthium laxum (L.) H.O.Yates	2703085	EXACT	100	ACCEPTED	SPECIES	Plantae	Tracheophyta	Liliopsida	Poales	Poaceae	Chasmanthium	Chasmanthium laxum	Chasmanthium laxum (L.) H.O.Yates
1	Chasmanthium sessiliflorum (Poiret) Yates	Chasmanthium sessiliflorum (Poir.) Yates	2703081	EXACT	100	SYNONYM	SPECIES	Plantae	Tracheophyta	Liliopsida	Poales	Poaceae	Chasmanthium	Chasmanthium laxum	Chasmanthium laxum (L.) H.O.Yates
1	Chelone glabra L.	Chelone glabra L.	5414935	EXACT	100	ACCEPTED	SPECIES	Plantae	Tracheophyta	Magnoliopsida	Lamiales	Plantaginaceae	Chelone	Chelone glabra	Chelone glabra L.
1	Chenopodium album L.	Chenopodium album L.	3083838	EXACT	100	ACCEPTED	SPECIES	Plantae	Tracheophyta	Magnoliopsida	Caryophyllales	Amaranthaceae	Chenopodium	Chenopodium album	Chenopodium album L.
1	Chimaphila maculata (L.) Pursh	Chimaphila maculata Pursh	2888304	EXACT	100	ACCEPTED	SPECIES	Plantae	Tracheophyta	Magnoliopsida	Ericales	Ericaceae	Chimaphila	Chimaphila maculata	Chimaphila maculata Pursh
1	Chionanthus virginicus L.	Chionanthus virginicus L.	3172303	EXACT	100	ACCEPTED	SPECIES	Plantae	Tracheophyta	Magnoliopsida	Lamiales	Oleaceae	Chionanthus	Chionanthus virginicus	Chionanthus virginicus L.
1	Chrysogonum virginianum L.	Chrysogonum virginianum L.	3152026	EXACT	100	ACCEPTED	SPECIES	Plantae	Tracheophyta	Magnoliopsida	Asterales	Asteraceae	Chrysogonum	Chrysogonum virginianum	Chrysogonum virginianum L.
1	Cicuta maculata L.	Cicuta maculata L.	5371867	EXACT	100	ACCEPTED	SPECIES	Plantae	Tracheophyta	Magnoliopsida	Apiales	Apiaceae	Cicuta	Cicuta maculata	Cicuta maculata L.
1	Cirsium altissimum (L.) Sprengel	Cirsium altissimum (L.) Spreng.	8078803	EXACT	100	ACCEPTED	SPECIES	Plantae	Tracheophyta	Magnoliopsida	Asterales	Asteraceae	Cirsium	Cirsium altissimum	Cirsium altissimum (L.) Spreng.
1	Cirsium horridulum Michaux	Cirsium horridulum Michx.	3112777	EXACT	100	ACCEPTED	SPECIES	Plantae	Tracheophyta	Magnoliopsida	Asterales	Asteraceae	Cirsium	Cirsium horridulum	Cirsium horridulum Michx.
1	Clematis crispa L.	Clematis crispa L.	3033593	EXACT	100	ACCEPTED	SPECIES	Plantae	Tracheophyta	Magnoliopsida	Ranunculales	Ranunculaceae	Clematis	Clematis crispa	Clematis crispa L.
1	Clematis virginica L.	Clematis virginiana L.	3033541	FUZZY	96	ACCEPTED	SPECIES	Plantae	Tracheophyta	Magnoliopsida	Ranunculales	Ranunculaceae	Clematis	Clematis virginiana	Clematis virginiana L.
1	Satureja georgiana (Harper) Ahles	Satureja georgiana (R.M.Harper) Ahles	2926957	EXACT	100	SYNONYM	SPECIES	Plantae	Tracheophyta	Magnoliopsida	Lamiales	Lamiaceae	Clinopodium	Clinopodium carolinianum	Clinopodium carolinianum Mill.
1	Clitoria mariana L.	Clitoria mariana L.	2946542	EXACT	100	ACCEPTED	SPECIES	Plantae	Tracheophyta	Magnoliopsida	Fabales	Fabaceae	Clitoria	Clitoria mariana	Clitoria mariana L.
1	Cocculus carolinus (L.) DC.	Cocculus carolinus DC.	3033941	EXACT	100	ACCEPTED	SPECIES	Plantae	Tracheophyta	Magnoliopsida	Ranunculales	Menispermaceae	Cocculus	Cocculus carolinus	Cocculus carolinus DC.
1	Panicum anceps Michaux var. anceps	Panicum anceps var. anceps	7324603	EXACT	98	SYNONYM	VARIETY	Plantae	Tracheophyta	Liliopsida	Poales	Poaceae	Coleataenia	Coleataenia anceps	Coleataenia anceps (Michx.) Soreng
1	Panicum rigidulum Bosc. ex Nees	Panicum rigidulum Bosc ex Nees	2705137	EXACT	100	SYNONYM	SPECIES	Plantae	Tracheophyta	Liliopsida	Poales	Poaceae	Coleataenia	Coleataenia rigidula	Coleataenia rigidula (Bosc ex Nees) LeBlond
1	Collinsonia canadensis L.	Collinsonia canadensis L.	2926628	EXACT	100	ACCEPTED	SPECIES	Plantae	Tracheophyta	Magnoliopsida	Lamiales	Lamiaceae	Collinsonia	Collinsonia canadensis	Collinsonia canadensis L.
1	Commelina erecta L.	Commelina erecta L.	2764389	EXACT	100	ACCEPTED	SPECIES	Plantae	Tracheophyta	Liliopsida	Commelinales	Commelinaceae	Commelina	Commelina erecta	Commelina erecta L.
1	Commelina virginica L.	Commelina virginica L.	2764028	EXACT	100	ACCEPTED	SPECIES	Plantae	Tracheophyta	Liliopsida	Commelinales	Commelinaceae	Commelina	Commelina virginica	Commelina virginica L.
1	Eupatorium coelestinum L.	Eupatorium coelestinum L.	5386176	EXACT	100	SYNONYM	SPECIES	Plantae	Tracheophyta	Magnoliopsida	Asterales	Asteraceae	Conoclinium	Conoclinium coelestinum	Conoclinium coelestinum DC.
1	Coreopsis grandiflora Hogg	Coreopsis grandiflora Hogg	8534879	EXACT	100	DOUBTFUL	SPECIES	Plantae	Tracheophyta	Magnoliopsida	Asterales	Asteraceae	Coreopsis	Coreopsis grandiflora	Coreopsis grandiflora Hogg ex Sw.
1	Coreopsis major Walter	Coreopsis major Walter	3133888	EXACT	100	ACCEPTED	SPECIES	Plantae	Tracheophyta	Magnoliopsida	Asterales	Asteraceae	Coreopsis	Coreopsis major	Coreopsis major Walter
1	Cornus amomum Miller	Cornus amomum Mill.	3082227	EXACT	100	ACCEPTED	SPECIES	Plantae	Tracheophyta	Magnoliopsida	Cornales	Cornaceae	Cornus	Cornus amomum	Cornus amomum Mill.
1	Cornus florida L.	Cornus florida L.	3082240	EXACT	100	ACCEPTED	SPECIES	Plantae	Tracheophyta	Magnoliopsida	Cornales	Cornaceae	Cornus	Cornus florida	Cornus florida L.
1	Crataegus flabellata (Bosc) K. Koch	Crataegus flabellata (Spach) K.Koch	3014366	EXACT	99	SYNONYM	SPECIES	Plantae	Tracheophyta	Magnoliopsida	Rosales	Rosaceae	Crataegus	Crataegus flabellata	Crataegus flabellata Bosc ex M.Roem.
1	Crataegus uniflora Muenchh.	Crataegus uniflora M√ºnchh.	3015389	EXACT	100	ACCEPTED	SPECIES	Plantae	Tracheophyta	Magnoliopsida	Rosales	Rosaceae	Crataegus	Crataegus uniflora	Crataegus uniflora M√ºnchh.
1	Croton glandulosus L. var. septentrionalis Muell-Arg.	Croton glandulosus var. septentrionalis M√ºll.Arg.	8032516	EXACT	100	ACCEPTED	VARIETY	Plantae	Tracheophyta	Magnoliopsida	Malpighiales	Euphorbiaceae	Croton	Croton glandulosus	Croton glandulosus L.
1	Cuscuta compacta Jussieu	Cuscuta compacta Juss.	7363321	EXACT	100	DOUBTFUL	SPECIES	Plantae	Tracheophyta	Magnoliopsida	Solanales	Convolvulaceae	Cuscuta	Cuscuta compacta	Cuscuta compacta Juss. ex Choisy
1	Cyclospermum ammi (L.) Britton	Cyclospermum ammi (Lag.) Britton	7522735	EXACT	100	ACCEPTED	SPECIES	Plantae	Tracheophyta	Magnoliopsida	Apiales	Apiaceae	Cyclospermum	Cyclospermum ammi	Cyclospermum ammi (Lag.) Britton
1	Cynodon dactylon (L.) Persoon	Cynodon dactylon (L.) Pers.	6109637	EXACT	100	ACCEPTED	SPECIES	Plantae	Tracheophyta	Liliopsida	Poales	Poaceae	Cynodon	Cynodon dactylon	Cynodon dactylon (L.) Pers.
1	Cyperus croceus Vahl	Cyperus croceus Vahl	2713916	EXACT	100	ACCEPTED	SPECIES	Plantae	Tracheophyta	Liliopsida	Poales	Cyperaceae	Cyperus	Cyperus croceus	Cyperus croceus Vahl
1	Cyperus flavescens L.	Cyperus flavescens L.	2730906	EXACT	100	ACCEPTED	SPECIES	Plantae	Tracheophyta	Liliopsida	Poales	Cyperaceae	Cyperus	Cyperus flavescens	Cyperus flavescens L.
1	Kyllinga pumila Michaux	Kyllinga pumila Michx.	2718844	EXACT	100	SYNONYM	SPECIES	Plantae	Tracheophyta	Liliopsida	Poales	Cyperaceae	Cyperus	Cyperus hortensis	Cyperus hortensis (Salzm. ex Steud.) Dorr
1	Cyperus strigosus L.	Cyperus strigosus L.	2716719	EXACT	100	ACCEPTED	SPECIES	Plantae	Tracheophyta	Liliopsida	Poales	Cyperaceae	Cyperus	Cyperus strigosus	Cyperus strigosus L.
1	Cyrilla racemiflora L.	Cyrilla racemiflora L.	5333448	EXACT	100	ACCEPTED	SPECIES	Plantae	Tracheophyta	Magnoliopsida	Ericales	Cyrillaceae	Cyrilla	Cyrilla racemiflora	Cyrilla racemiflora L.
1	Dactylis glomerata L.	Dactylis glomerata L.	2705308	EXACT	100	ACCEPTED	SPECIES	Plantae	Tracheophyta	Liliopsida	Poales	Poaceae	Dactylis	Dactylis glomerata	Dactylis glomerata L.
1	Danthonia sericea Nuttall	Danthonia sericea Nutt.	2703256	EXACT	100	ACCEPTED	SPECIES	Plantae	Tracheophyta	Liliopsida	Poales	Poaceae	Danthonia	Danthonia sericea	Danthonia sericea Nutt.
1	Datura stramonium L.	Datura L.	2928734	HIGHERRANK	94	ACCEPTED	GENUS	Plantae	Tracheophyta	Magnoliopsida	Solanales	Solanaceae	Datura	Datura stramonium	Datura stramonium L.
1	Daucus carota L.	Daucus carota L.	3034742	EXACT	100	ACCEPTED	SPECIES	Plantae	Tracheophyta	Magnoliopsida	Apiales	Apiaceae	Daucus	Daucus carota	Daucus carota L.
1	Desmodium dillenii Darl.	Desmodium dillenii Darl.	2967866	EXACT	100	ACCEPTED	SPECIES	Plantae	Tracheophyta	Magnoliopsida	Fabales	Fabaceae	Desmodium	Desmodium dillenii	Desmodium dillenii Darl.
1	Desmodium laevigatum (Nutt.) DC.	Desmodium laevigatum DC.	2967094	EXACT	100	ACCEPTED	SPECIES	Plantae	Tracheophyta	Magnoliopsida	Fabales	Fabaceae	Desmodium	Desmodium laevigatum	Desmodium laevigatum DC.
1	Desmodium nudiflorum (L.) DC.	Desmodium nudiflorum (L.) DC.	2967613	EXACT	100	ACCEPTED	SPECIES	Plantae	Tracheophyta	Magnoliopsida	Fabales	Fabaceae	Desmodium	Desmodium nudiflorum	Desmodium nudiflorum (L.) DC.
1	Desmodium paniculatum (L.) DC.	Desmodium paniculatum DC.	2967543	EXACT	100	ACCEPTED	SPECIES	Plantae	Tracheophyta	Magnoliopsida	Fabales	Fabaceae	Desmodium	Desmodium paniculatum	Desmodium paniculatum DC.
1	Desmodium rotundifolium DC.	Desmodium rotundifolium DC.	2952124	EXACT	100	ACCEPTED	SPECIES	Plantae	Tracheophyta	Magnoliopsida	Fabales	Fabaceae	Desmodium	Desmodium rotundifolium	Desmodium rotundifolium DC.
1	Dianthus armeria L.	Dianthus armeria L.	3085413	EXACT	100	ACCEPTED	SPECIES	Plantae	Tracheophyta	Magnoliopsida	Caryophyllales	Caryophyllaceae	Dianthus	Dianthus armeria	Dianthus armeria L.
1	Dicliptera brachiata (Pursh) Sprengel	Dicliptera brachiata Spreng.	5415365	EXACT	100	ACCEPTED	SPECIES	Plantae	Tracheophyta	Magnoliopsida	Lamiales	Acanthaceae	Dicliptera	Dicliptera brachiata	Dicliptera brachiata Spreng.
1	Digitaria sanguinalis (L.) Scopoli	Digitaria sanguinalis (L.) Scop.	5289972	EXACT	100	ACCEPTED	SPECIES	Plantae	Tracheophyta	Liliopsida	Poales	Poaceae	Digitaria	Digitaria sanguinalis	Digitaria sanguinalis (L.) Scop.
1	Diodia virginiana L.	Diodia virginiana L.	2908579	EXACT	100	ACCEPTED	SPECIES	Plantae	Tracheophyta	Magnoliopsida	Gentianales	Rubiaceae	Diodia	Diodia virginiana	Diodia virginiana L.
1	Dioscorea batatas Dcne.	Dioscorea batatas Decne.	2754745	EXACT	82	SYNONYM	SPECIES	Plantae	Tracheophyta	Liliopsida	Dioscoreales	Dioscoreaceae	Dioscorea	Dioscorea polystachya	Dioscorea polystachya Turcz.
1	Dioscorea villosa L.	Dioscorea villosa L.	2754553	EXACT	100	ACCEPTED	SPECIES	Plantae	Tracheophyta	Liliopsida	Dioscoreales	Dioscoreaceae	Dioscorea	Dioscorea villosa	Dioscorea villosa L.
1	Diospyros virginiana L.	Diospyros virginiana L.	3032986	EXACT	100	ACCEPTED	SPECIES	Plantae	Tracheophyta	Magnoliopsida	Ericales	Ebenaceae	Diospyros	Diospyros virginiana	Diospyros virginiana L.
1	Aster infirmus Michaux	Aster infirmus Michx.	5404911	EXACT	100	SYNONYM	SPECIES	Plantae	Tracheophyta	Magnoliopsida	Asterales	Asteraceae	Doellingeria	Doellingeria infirma	Doellingeria infirma Greene
1	Chenopodium ambrosioides L.	Chenopodium ambrosioides L.	3083836	EXACT	100	SYNONYM	SPECIES	Plantae	Tracheophyta	Magnoliopsida	Caryophyllales	Amaranthaceae	Dysphania	Dysphania ambrosioides	Dysphania ambrosioides (L.) Mosyakin & Clemants
1	Echinochloa crusgalli (L.) Beauvois	Echinochloa crus-galli (L.) P.Beauv.	2702808	FUZZY	100	ACCEPTED	SPECIES	Plantae	Tracheophyta	Liliopsida	Poales	Poaceae	Echinochloa	Echinochloa crus-galli	Echinochloa crus-galli (L.) P.Beauv.
1	Eclipta alba (L.) Hasskarl	Eclipta alba Hassk.	5384955	EXACT	100	ACCEPTED	SPECIES	Plantae	Tracheophyta	Magnoliopsida	Asterales	Asteraceae	Eclipta	Eclipta alba	Eclipta alba Hassk.
1	Elaeagnus pungens Thunb.	Elaeagnus pungens Thunb.	3039270	EXACT	100	SYNONYM	SPECIES	Plantae	Tracheophyta	Magnoliopsida	Rosales	Elaeagnaceae	Elaeagnus	Elaeagnus pungens	Elaeagnus pungens C.P.Thunb. ex A.Murray
1	Eleocharis obtusa (Willd.) Schultes	Eleocharis obtusa (Willd.) Schult.	2717467	EXACT	100	ACCEPTED	SPECIES	Plantae	Tracheophyta	Liliopsida	Poales	Cyperaceae	Eleocharis	Eleocharis obtusa	Eleocharis obtusa (Willd.) Schult.
1	Elephantopus carolinianus Willd.	Elephantopus carolinianus Willd.	7434217	EXACT	100	SYNONYM	SPECIES	Plantae	Tracheophyta	Magnoliopsida	Asterales	Asteraceae	Elephantopus	Elephantopus carolinianus	Elephantopus carolinianus Raeusch.
1	Elephantopus tomentosus L.	Elephantopus tomentosus L.	5395934	EXACT	100	ACCEPTED	SPECIES	Plantae	Tracheophyta	Magnoliopsida	Asterales	Asteraceae	Elephantopus	Elephantopus tomentosus	Elephantopus tomentosus L.
1	Eleusine indica (L.) Gaertner	Eleusine indica (L.) Gaertn.	2705953	EXACT	100	ACCEPTED	SPECIES	Plantae	Tracheophyta	Liliopsida	Poales	Poaceae	Eleusine	Eleusine indica	Eleusine indica (L.) Gaertn.
1	Elymus virginicus L.	Elymus virginicus L.	5290318	EXACT	100	ACCEPTED	SPECIES	Plantae	Tracheophyta	Liliopsida	Poales	Poaceae	Elymus	Elymus virginicus	Elymus virginicus L.
1	Eragrostis spectabilis (Pursh) Steudel	Eragrostis spectabilis Steud.	2705413	EXACT	100	ACCEPTED	SPECIES	Plantae	Tracheophyta	Liliopsida	Poales	Poaceae	Eragrostis	Eragrostis spectabilis	Eragrostis spectabilis Steud.
1	Erigeron annuus (L.) Persoon	Erigeron annuus Pers.	3117449	EXACT	100	ACCEPTED	SPECIES	Plantae	Tracheophyta	Magnoliopsida	Asterales	Asteraceae	Erigeron	Erigeron annuus	Erigeron annuus Pers.
1	Conzya canadensis (L.) Cronq.	Conyza canadensis (L.) Cronq.	5404801	FUZZY	92	SYNONYM	SPECIES	Plantae	Tracheophyta	Magnoliopsida	Asterales	Asteraceae	Erigeron	Erigeron canadensis	Erigeron canadensis L.
1	Erigeron strigosus Muhlenb. ex Willd. M	Erigeron strigosus Muhl. ex Willd.	3146632	EXACT	100	ACCEPTED	SPECIES	Plantae	Tracheophyta	Magnoliopsida	Asterales	Asteraceae	Erigeron	Erigeron strigosus	Erigeron strigosus Muhl. ex Willd.
1	Erythronium umbilicatum C. Parks & Hardin	Erythronium umbilicatum C.R.Parks & Hardin	2752903	EXACT	100	ACCEPTED	SPECIES	Plantae	Tracheophyta	Liliopsida	Liliales	Liliaceae	Erythronium	Erythronium umbilicatum	Erythronium umbilicatum C.R.Parks & Hardin
1	Leucothoe racemosa (L.) A. Gray	Leucothoe racemosa (L.) Gray	5333363	EXACT	100	SYNONYM	SPECIES	Plantae	Tracheophyta	Magnoliopsida	Ericales	Ericaceae	Eubotrys	Eubotrys racemosa	Eubotrys racemosa Nutt.
1	Euonymus americanus L.	Euonymus americanus L.	3169130	EXACT	100	ACCEPTED	SPECIES	Plantae	Tracheophyta	Magnoliopsida	Celastrales	Celastraceae	Euonymus	Euonymus americanus	Euonymus americanus L.
1	Eupatorium capillifolium (Lam.) Small	Eupatorium capillifolium Small.	5403126	EXACT	100	ACCEPTED	SPECIES	Plantae	Tracheophyta	Magnoliopsida	Asterales	Asteraceae	Eupatorium	Eupatorium capillifolium	Eupatorium capillifolium Small.
1	Eupatorium hyssopifolium L.	Eupatorium hyssopifolium L.	5403057	EXACT	100	ACCEPTED	SPECIES	Plantae	Tracheophyta	Magnoliopsida	Asterales	Asteraceae	Eupatorium	Eupatorium hyssopifolium	Eupatorium hyssopifolium L.
1	Euphorbia corollata L.	Euphorbia corollata L.	3068091	EXACT	100	ACCEPTED	SPECIES	Plantae	Tracheophyta	Magnoliopsida	Malpighiales	Euphorbiaceae	Euphorbia	Euphorbia corollata	Euphorbia corollata L.
1	Chamaesyce nutans (Lag.) Small	Chamaesyce nutans (Lag.) Small	3070358	EXACT	100	SYNONYM	SPECIES	Plantae	Tracheophyta	Magnoliopsida	Malpighiales	Euphorbiaceae	Euphorbia	Euphorbia nutans	Euphorbia nutans Lag.
1	Eupatorium purpureum L.	Eupatorium purpureum L.	5401611	EXACT	100	SYNONYM	SPECIES	Plantae	Tracheophyta	Magnoliopsida	Asterales	Asteraceae	Eutrochium	Eutrochium purpureum	Eutrochium purpureum (L.) E.E.Lamont
1	Fagus grandifolia Ehrh.	Fagus grandifolia Ehrh.	2882274	EXACT	100	ACCEPTED	SPECIES	Plantae	Tracheophyta	Magnoliopsida	Fagales	Fagaceae	Fagus	Fagus grandifolia	Fagus grandifolia Ehrh.
1	Festuca pratensis Hud.	Festuca pratensis Huds.	2706239	EXACT	100	SYNONYM	SPECIES	Plantae	Tracheophyta	Liliopsida	Poales	Poaceae	Festuca	Festuca rubra	Festuca rubra L.
1	Fimbristylis annua (All.) R. and S.	Fimbristylis annua (All.) Roem. & Schult.	2708893	EXACT	100	SYNONYM	SPECIES	Plantae	Tracheophyta	Liliopsida	Poales	Cyperaceae	Fimbristylis	Fimbristylis dichotoma	Fimbristylis dichotoma (L.) Vahl
1	Fragaria virginiana Duchesne	Fragaria virginiana Duchesne	7950792	EXACT	100	ACCEPTED	SPECIES	Plantae	Tracheophyta	Magnoliopsida	Rosales	Rosaceae	Fragaria	Fragaria virginiana	Fragaria virginiana Duchesne
1	Fraxinus americana L.	Fraxinus americana L.	3172327	EXACT	100	ACCEPTED	SPECIES	Plantae	Tracheophyta	Magnoliopsida	Lamiales	Oleaceae	Fraxinus	Fraxinus americana	Fraxinus americana L.
1	Fraxinus pennsylvanica Marshall	Fraxinus pennsylvanica Marshall	3172348	EXACT	100	ACCEPTED	SPECIES	Plantae	Tracheophyta	Magnoliopsida	Lamiales	Oleaceae	Fraxinus	Fraxinus pennsylvanica	Fraxinus pennsylvanica Marshall
1	Galium aparine L.	Galium aparine L.	2913548	EXACT	100	ACCEPTED	SPECIES	Plantae	Tracheophyta	Magnoliopsida	Gentianales	Rubiaceae	Galium	Galium aparine	Galium aparine L.
1	Galium circaezans Michaux	Galium circaezans Michx.	2914722	EXACT	100	ACCEPTED	SPECIES	Plantae	Tracheophyta	Magnoliopsida	Gentianales	Rubiaceae	Galium	Galium circaezans	Galium circaezans Michx.
1	Galium obtusum Bigelow	Galium obtusum Bigelow	2913472	EXACT	100	ACCEPTED	SPECIES	Plantae	Tracheophyta	Magnoliopsida	Gentianales	Rubiaceae	Galium	Galium obtusum	Galium obtusum Bigelow
1	Galium pilosum Aiton	Galium pilosum Aiton	2913935	EXACT	100	ACCEPTED	SPECIES	Plantae	Tracheophyta	Magnoliopsida	Gentianales	Rubiaceae	Galium	Galium pilosum	Galium pilosum Aiton
1	Galium tinctorium L.	Galium tinctorium L.	2913380	EXACT	100	ACCEPTED	SPECIES	Plantae	Tracheophyta	Magnoliopsida	Gentianales	Rubiaceae	Galium	Galium tinctorium	Galium tinctorium L.
1	Galium triflorum Michaux	Galium triflorum Michx.	2913463	EXACT	100	ACCEPTED	SPECIES	Plantae	Tracheophyta	Magnoliopsida	Gentianales	Rubiaceae	Galium	Galium triflorum	Galium triflorum Michx.
1	Ghaphalium purpureum L.	Gnaphalium purpureum L.	5390819	FUZZY	91	SYNONYM	SPECIES	Plantae	Tracheophyta	Magnoliopsida	Asterales	Asteraceae	Gamochaeta	Gamochaeta purpurea	Gamochaeta purpurea (L.) Cabrera
1	Gelsemium sempervirens (L.) Ait.f.	Gelsemium sempervirens (L.) W.T.Aiton	7874345	EXACT	100	SYNONYM	SPECIES	Plantae	Tracheophyta	Magnoliopsida	Gentianales	Gelsemiaceae	Gelsemium	Gelsemium sempervirens	Gelsemium sempervirens (L.) J.St.-Hil.
1	Gentiana saponaria L.	Gentiana saponaria L.	3170086	EXACT	100	ACCEPTED	SPECIES	Plantae	Tracheophyta	Magnoliopsida	Gentianales	Gentianaceae	Gentiana	Gentiana saponaria	Gentiana saponaria L.
1	Geranium carolinianum L.	Geranium carolinianum L.	2890623	EXACT	100	ACCEPTED	SPECIES	Plantae	Tracheophyta	Magnoliopsida	Geraniales	Geraniaceae	Geranium	Geranium carolinianum	Geranium carolinianum L.
1	Geranium maculatum L.	Geranium maculatum L.	7808016	EXACT	100	ACCEPTED	SPECIES	Plantae	Tracheophyta	Magnoliopsida	Geraniales	Geraniaceae	Geranium	Geranium maculatum	Geranium maculatum L.
1	Geranium molle L.	Geranium molle L.	2891488	EXACT	100	ACCEPTED	SPECIES	Plantae	Tracheophyta	Magnoliopsida	Geraniales	Geraniaceae	Geranium	Geranium molle	Geranium molle L.
1	Glecoma hederacea L.	Glecoma hederacea L.	2927227	EXACT	100	SYNONYM	SPECIES	Plantae	Tracheophyta	Magnoliopsida	Lamiales	Lamiaceae	Glechoma	Glechoma hederacea	Glechoma hederacea L.
1	Gleditsia triacanthos L.	Gleditsia triacanthos L.	2959443	EXACT	100	ACCEPTED	SPECIES	Plantae	Tracheophyta	Magnoliopsida	Fabales	Fabaceae	Gleditsia	Gleditsia triacanthos	Gleditsia triacanthos L.
1	Glyceria striata (Lam.) Hitchcock	Glyceria striata (Lam.) Hitchc.	2705503	EXACT	100	ACCEPTED	SPECIES	Plantae	Tracheophyta	Liliopsida	Poales	Poaceae	Glyceria	Glyceria striata	Glyceria striata (Lam.) Hitchc.
1	Halesia carolina L.	Halesia carolina L.	5371655	EXACT	100	ACCEPTED	SPECIES	Plantae	Tracheophyta	Magnoliopsida	Ericales	Styracaceae	Halesia	Halesia carolina	Halesia carolina L.
1	Hamamelis virginiana L.	Hamamelis virginiana L.	3152827	EXACT	100	ACCEPTED	SPECIES	Plantae	Tracheophyta	Magnoliopsida	Saxifragales	Hamamelidaceae	Hamamelis	Hamamelis virginiana	Hamamelis virginiana L.
1	Helenium amarum (Raf.) H. Rock	Helenium amarum (Raf.) H.Rock	5401836	EXACT	100	ACCEPTED	SPECIES	Plantae	Tracheophyta	Magnoliopsida	Asterales	Asteraceae	Helenium	Helenium amarum	Helenium amarum (Raf.) H.Rock
1	Helenium autumnale L.	Helenium autumnale L.	5401877	EXACT	100	ACCEPTED	SPECIES	Plantae	Tracheophyta	Magnoliopsida	Asterales	Asteraceae	Helenium	Helenium autumnale	Helenium autumnale L.
1	Helianthus hirsutus Raf.	Helianthus hirsutus Raf.	3119209	EXACT	100	ACCEPTED	SPECIES	Plantae	Tracheophyta	Magnoliopsida	Asterales	Asteraceae	Helianthus	Helianthus hirsutus	Helianthus hirsutus Raf.
1	Helanthus microcephalus Torrey & A. Gray	Helianthus microcephalus Torr. & A.Gray	4250889	FUZZY	91	ACCEPTED	SPECIES	Plantae	Tracheophyta	Magnoliopsida	Asterales	Asteraceae	Helianthus	Helianthus microcephalus	Helianthus microcephalus Torr. & A.Gray
1	Hemerocallis fulva L.	Hemerocallis fulva L.	2781074	EXACT	100	ACCEPTED	SPECIES	Plantae	Tracheophyta	Liliopsida	Asparagales	Asphodelaceae	Hemerocallis	Hemerocallis fulva	Hemerocallis fulva L.
1	Hepatica nobilis Schreber	Hepatica nobilis Schreb.	5371699	EXACT	100	ACCEPTED	SPECIES	Plantae	Tracheophyta	Magnoliopsida	Ranunculales	Ranunculaceae	Hepatica	Hepatica nobilis	Hepatica nobilis Schreb.
1	Heuchera americana L.	Heuchera americana L.	3032665	EXACT	100	ACCEPTED	SPECIES	Plantae	Tracheophyta	Magnoliopsida	Saxifragales	Saxifragaceae	Heuchera	Heuchera americana	Heuchera americana L.
1	Diodia teres Walter	Diodia teres Walter	2901521	EXACT	100	SYNONYM	SPECIES	Plantae	Tracheophyta	Magnoliopsida	Gentianales	Rubiaceae	Hexasepalum	Hexasepalum teres	Hexasepalum teres (Walter) J.H.Kirkbr.
1	Asarum arifolium Michaux	Asarum arifolium Michx.	6418196	EXACT	100	SYNONYM	SPECIES	Plantae	Tracheophyta	Magnoliopsida	Piperales	Aristolochiaceae	Hexastylis	Hexastylis arifolia	Hexastylis arifolia Small
1	Hibiscus laevis All.	Hibiscus laevis All.	3152576	EXACT	100	ACCEPTED	SPECIES	Plantae	Tracheophyta	Magnoliopsida	Malvales	Malvaceae	Hibiscus	Hibiscus laevis	Hibiscus laevis All.
1	Hieracium gronovii L.	Hieracium gronovii L.	3136062	EXACT	100	ACCEPTED	SPECIES	Plantae	Tracheophyta	Magnoliopsida	Asterales	Asteraceae	Hieracium	Hieracium gronovii	Hieracium gronovii L.
1	Hordeum pusillum Nuttall	Hordeum pusillum Nutt.	2706070	EXACT	100	ACCEPTED	SPECIES	Plantae	Tracheophyta	Liliopsida	Poales	Poaceae	Hordeum	Hordeum pusillum	Hordeum pusillum Nutt.
1	Houstonia caerulea L.	Houstonia caerulea L.	5338866	EXACT	100	ACCEPTED	SPECIES	Plantae	Tracheophyta	Magnoliopsida	Gentianales	Rubiaceae	Houstonia	Houstonia caerulea	Houstonia caerulea L.
1	Houstonia longifolia Gaertner	Houstonia longifolia Gaertn.	5338830	EXACT	100	ACCEPTED	SPECIES	Plantae	Tracheophyta	Magnoliopsida	Gentianales	Rubiaceae	Houstonia	Houstonia longifolia	Houstonia longifolia Gaertn.
1	Houstonia purpurea L.	Houstonia purpurea L.	5338840	EXACT	100	ACCEPTED	SPECIES	Plantae	Tracheophyta	Magnoliopsida	Gentianales	Rubiaceae	Houstonia	Houstonia purpurea	Houstonia purpurea L.
1	Houstonia pusilla Schoepf	Houstonia pusilla Sch√∂pf	5338804	EXACT	100	ACCEPTED	SPECIES	Plantae	Tracheophyta	Magnoliopsida	Gentianales	Rubiaceae	Houstonia	Houstonia pusilla	Houstonia pusilla Sch√∂pf
1	Hydrangea arborescens L.	Hydrangea arborescens L.	2985986	EXACT	100	ACCEPTED	SPECIES	Plantae	Tracheophyta	Magnoliopsida	Cornales	Hydrangeaceae	Hydrangea	Hydrangea arborescens	Hydrangea arborescens L.
1	Decumaria barbara L.	Decumaria barbara L.	2985969	EXACT	100	SYNONYM	SPECIES	Plantae	Tracheophyta	Magnoliopsida	Cornales	Hydrangeaceae	Hydrangea	Hydrangea barbara	Hydrangea barbara (L.) Bernd Schulz
1	Hydrocotyle sp. (vegetative)	Hydrocotyle L.	3034601	HIGHERRANK	94	ACCEPTED	GENUS	Plantae	Tracheophyta	Magnoliopsida	Apiales	Apiaceae	Hydrocotyle	Hydrocotyle sp.	Hydrocotyle L.
1	Hymenocallis occidentalis (Le Conte) Kunth	Hymenocallis occidentalis (Leconte) Kunth	2860200	EXACT	100	ACCEPTED	SPECIES	Plantae	Tracheophyta	Liliopsida	Asparagales	Amaryllidaceae	Hymenocallis	Hymenocallis occidentalis	Hymenocallis occidentalis (Leconte) Kunth
1	Hypericum frondosum Michaux	Hypericum frondosum Michx.	3189521	EXACT	100	ACCEPTED	SPECIES	Plantae	Tracheophyta	Magnoliopsida	Malpighiales	Hypericaceae	Hypericum	Hypericum frondosum	Hypericum frondosum Michx.
1	Hypericum gentianoides (L.) BSP	Hypericum gentianoides Britton	3189514	EXACT	81	ACCEPTED	SPECIES	Plantae	Tracheophyta	Magnoliopsida	Malpighiales	Hypericaceae	Hypericum	Hypericum gentianoides	Hypericum gentianoides Britton
1	Ascyrum hypericoides L.	Ascyrum hypericoides L.	6436716	EXACT	100	SYNONYM	SPECIES	Plantae	Tracheophyta	Magnoliopsida	Malpighiales	Hypericaceae	Hypericum	Hypericum hypericoides	Hypericum hypericoides Crantz
1	Hypericum mutilum L.	Hypericum mutilum L.	3189462	EXACT	100	ACCEPTED	SPECIES	Plantae	Tracheophyta	Magnoliopsida	Malpighiales	Hypericaceae	Hypericum	Hypericum mutilum	Hypericum mutilum L.
1	Hypericum nudiflorum Michaux ex Willd.	Hypericum nudiflorum Michx. ex Willd.	3189518	EXACT	100	ACCEPTED	SPECIES	Plantae	Tracheophyta	Magnoliopsida	Malpighiales	Hypericaceae	Hypericum	Hypericum nudiflorum	Hypericum nudiflorum Michx. ex Willd.
1	Hypericum punctatum Lam.	Hypericum punctatum Lam.	3189495	EXACT	100	ACCEPTED	SPECIES	Plantae	Tracheophyta	Magnoliopsida	Malpighiales	Hypericaceae	Hypericum	Hypericum punctatum	Hypericum punctatum Lam.
1	Hypoxis hirsuta (L.) Coville	Hypoxis hirsuta Coville	2852794	EXACT	100	ACCEPTED	SPECIES	Plantae	Tracheophyta	Liliopsida	Asparagales	Hypoxidaceae	Hypoxis	Hypoxis hirsuta	Hypoxis hirsuta Coville
1	Ilex decidua Walter	Ilex decidua Walter	5414259	EXACT	100	ACCEPTED	SPECIES	Plantae	Tracheophyta	Magnoliopsida	Aquifoliales	Aquifoliaceae	Ilex	Ilex decidua	Ilex decidua Walter
1	Ilex opaca Aiton			NONE	100									Ilex opaca	Ilex opaca Soland. ex Ait.
1	Impatiens capensis Meerb.	Impatiens capensis Meerb.	2891774	EXACT	100	ACCEPTED	SPECIES	Plantae	Tracheophyta	Magnoliopsida	Ericales	Balsaminaceae	Impatiens	Impatiens capensis	Impatiens capensis Meerb.
1	Ipomoea pandurata (L.) G.F.W. Meyer	Ipomoea pandurata (L.) G.F.W.Mey.	2928514	EXACT	100	SYNONYM	SPECIES	Plantae	Tracheophyta	Magnoliopsida	Solanales	Convolvulaceae	Ipomoea	Ipomoea batatas	Ipomoea batatas (L.) Lam.
1	Ipomoea hederacea (L.) Jacq.	Ipomoea hederacea Jacq.	2928538	EXACT	100	ACCEPTED	SPECIES	Plantae	Tracheophyta	Magnoliopsida	Solanales	Convolvulaceae	Ipomoea	Ipomoea hederacea	Ipomoea hederacea Jacq.
1	Ipomoea lacunosa L.	Ipomoea lacunosa L.	2928584	EXACT	100	ACCEPTED	SPECIES	Plantae	Tracheophyta	Magnoliopsida	Solanales	Convolvulaceae	Ipomoea	Ipomoea lacunosa	Ipomoea lacunosa L.
1	Ipomoea purpurea (L.) Roth	Ipomoea purpurea (L.) Roth	2928576	EXACT	100	ACCEPTED	SPECIES	Plantae	Tracheophyta	Magnoliopsida	Solanales	Convolvulaceae	Ipomoea	Ipomoea purpurea	Ipomoea purpurea (L.) Roth
1	Ipomoea coccinea L.	Ipomoea coccinea L.	2928560	EXACT	100	SYNONYM	SPECIES	Plantae	Tracheophyta	Magnoliopsida	Solanales	Convolvulaceae	Ipomoea	Ipomoea rubriflora	Ipomoea rubriflora O'Donell
1	Itea virginica L.	Itea virginica L.	5362113	EXACT	100	ACCEPTED	SPECIES	Plantae	Tracheophyta	Magnoliopsida	Saxifragales	Iteaceae	Itea	Itea virginica	Itea virginica L.
1	Juglans nigra L.	Juglans nigra L.	3054357	EXACT	100	ACCEPTED	SPECIES	Plantae	Tracheophyta	Magnoliopsida	Fagales	Juglandaceae	Juglans	Juglans nigra	Juglans nigra L.
1	Juncus acuminatus Michaux	Juncus acuminatus Michx.	2701323	EXACT	100	ACCEPTED	SPECIES	Plantae	Tracheophyta	Liliopsida	Poales	Juncaceae	Juncus	Juncus acuminatus	Juncus acuminatus Michx.
1	Juncus coriaceus Mackenzie	Juncus coriaceus Mack.	2701445	EXACT	100	ACCEPTED	SPECIES	Plantae	Tracheophyta	Liliopsida	Poales	Juncaceae	Juncus	Juncus coriaceus	Juncus coriaceus Mack.
1	Juncus dichotomus Elliott	Juncus dichotomus Elliott	2701120	EXACT	100	ACCEPTED	SPECIES	Plantae	Tracheophyta	Liliopsida	Poales	Juncaceae	Juncus	Juncus dichotomus	Juncus dichotomus Elliott
1	Juncus diffusissimus Buckley	Juncus diffusissimus Buckley	2701229	EXACT	100	ACCEPTED	SPECIES	Plantae	Tracheophyta	Liliopsida	Poales	Juncaceae	Juncus	Juncus diffusissimus	Juncus diffusissimus Buckley
1	Juncus effusus L.	Juncus effusus L.	2701311	EXACT	100	ACCEPTED	SPECIES	Plantae	Tracheophyta	Liliopsida	Poales	Juncaceae	Juncus	Juncus effusus	Juncus effusus L.
1	Juncus tenuis Willd.	Juncus tenuis Willd.	2702084	EXACT	100	ACCEPTED	SPECIES	Plantae	Tracheophyta	Liliopsida	Poales	Juncaceae	Juncus	Juncus tenuis	Juncus tenuis Willd.
1	Juniperus virginiana L.	Juniperus virginiana L.	2684391	EXACT	100	ACCEPTED	SPECIES	Plantae	Tracheophyta	Pinopsida	Pinales	Cupressaceae	Juniperus	Juniperus virginiana	Juniperus virginiana L.
1	Kalmia latifolia L.	Kalmia latifolia L.	2883005	EXACT	100	ACCEPTED	SPECIES	Plantae	Tracheophyta	Magnoliopsida	Ericales	Ericaceae	Kalmia	Kalmia latifolia	Kalmia latifolia L.
1	Krigia oppositifolia Raf.	Krigia oppositifolia Raf.	4215005	EXACT	100	SYNONYM	SPECIES	Plantae	Tracheophyta	Magnoliopsida	Asterales	Asteraceae	Krigia	Krigia cespitosa	Krigia cespitosa (Raf.) K.L.Chambers
1	Krigia virginica (L.) Willd.	Krigia virginica Willd.	3132412	EXACT	100	ACCEPTED	SPECIES	Plantae	Tracheophyta	Magnoliopsida	Asterales	Asteraceae	Krigia	Krigia virginica	Krigia virginica Willd.
1	Lactuca canadensis L.	Lactuca canadensis L.	3140315	EXACT	100	ACCEPTED	SPECIES	Plantae	Tracheophyta	Magnoliopsida	Asterales	Asteraceae	Lactuca	Lactuca canadensis	Lactuca canadensis L.
1	Lactuca floridana (L.) Gaertner	Lactuca floridana (L.) Gaertn.	3140423	EXACT	100	ACCEPTED	SPECIES	Plantae	Tracheophyta	Magnoliopsida	Asterales	Asteraceae	Lactuca	Lactuca floridana	Lactuca floridana (L.) Gaertn.
1	Lamium amplexicaule L.	Lamium amplexicaule L.	2926679	EXACT	100	ACCEPTED	SPECIES	Plantae	Tracheophyta	Magnoliopsida	Lamiales	Lamiaceae	Lamium	Lamium amplexicaule	Lamium amplexicaule L.
1	Lamium purpureum L.	Lamium purpureum L.	2926682	EXACT	100	ACCEPTED	SPECIES	Plantae	Tracheophyta	Magnoliopsida	Lamiales	Lamiaceae	Lamium	Lamium purpureum	Lamium purpureum L.
1	Lathyrus latifolius L.	Lathyrus latifolius L.	5356517	EXACT	100	ACCEPTED	SPECIES	Plantae	Tracheophyta	Magnoliopsida	Fabales	Fabaceae	Lathyrus	Lathyrus latifolius	Lathyrus latifolius L.
1	Leersia oryzoides (L.) Swartz	Leersia oryzoides (L.) Sw.	2702905	EXACT	100	ACCEPTED	SPECIES	Plantae	Tracheophyta	Liliopsida	Poales	Poaceae	Leersia	Leersia oryzoides	Leersia oryzoides (L.) Sw.
1	Lemna valdiviana Phil.	Lemna valdiviana Phil.	2867612	EXACT	100	ACCEPTED	SPECIES	Plantae	Tracheophyta	Liliopsida	Alismatales	Araceae	Lemna	Lemna valdiviana	Lemna valdiviana Phil.
1	Lepidium virginicum L.	Lepidium virginicum L.	5376648	EXACT	100	ACCEPTED	SPECIES	Plantae	Tracheophyta	Magnoliopsida	Brassicales	Brassicaceae	Lepidium	Lepidium virginicum	Lepidium virginicum L.
1	Lespedeza bicolor Turcz.	Lespedeza bicolor Turcz.	2955759	EXACT	100	ACCEPTED	SPECIES	Plantae	Tracheophyta	Magnoliopsida	Fabales	Fabaceae	Lespedeza	Lespedeza bicolor	Lespedeza bicolor Turcz.
1	Lespedeza hirta (L.) Hornemann	Lespedeza hirta Hornem.	2955750	EXACT	100	ACCEPTED	SPECIES	Plantae	Tracheophyta	Magnoliopsida	Fabales	Fabaceae	Lespedeza	Lespedeza hirta	Lespedeza hirta Hornem.
1	Lespedeza intermedia (Watson) Britton	Lespedeza intermedia (S.Watson) Britton	2955635	EXACT	100	ACCEPTED	SPECIES	Plantae	Tracheophyta	Magnoliopsida	Fabales	Fabaceae	Lespedeza	Lespedeza intermedia	Lespedeza intermedia (S.Watson) Britton
1	Lespedeza cuneata (Dumont) G. Don	Lespedeza cuneata (Dum.Cours.) G.Don	8114276	EXACT	99	SYNONYM	SPECIES	Plantae	Tracheophyta	Magnoliopsida	Fabales	Fabaceae	Lespedeza	Lespedeza juncea	Lespedeza juncea (L.) Pers.
1	Lespedeza repens (L.) Barton	Lespedeza repens Barton	2955745	EXACT	100	ACCEPTED	SPECIES	Plantae	Tracheophyta	Magnoliopsida	Fabales	Fabaceae	Lespedeza	Lespedeza repens	Lespedeza repens Barton
1	Lespedeza virginica (L.) Britton	Lespedeza virginica (L.) Britton	2955685	EXACT	100	ACCEPTED	SPECIES	Plantae	Tracheophyta	Magnoliopsida	Fabales	Fabaceae	Lespedeza	Lespedeza virginica	Lespedeza virginica (L.) Britton
1	Chrysanthemum leucanthemum L.	Chrysanthemum leucanthemum L.	3134125	EXACT	100	SYNONYM	SPECIES	Plantae	Tracheophyta	Magnoliopsida	Asterales	Asteraceae	Leucanthemum	Leucanthemum vulgare	Leucanthemum vulgare Lam.
1	Liatris graminifolia Willd.	Liatris graminifolia (Walt.) Willd.	3104356	EXACT	100	SYNONYM	SPECIES	Plantae	Tracheophyta	Magnoliopsida	Asterales	Asteraceae	Liatris	Liatris pilosa	Liatris pilosa Willd.
1	Ligustrum sinense Lour.	Ligustrum sinense Lour.	3172294	EXACT	100	ACCEPTED	SPECIES	Plantae	Tracheophyta	Magnoliopsida	Lamiales	Oleaceae	Ligustrum	Ligustrum sinense	Ligustrum sinense Lour.
1	Lilium michauxii Poiret	Lilium michauxii Poir.	2753428	EXACT	100	ACCEPTED	SPECIES	Plantae	Tracheophyta	Liliopsida	Liliales	Liliaceae	Lilium	Lilium michauxii	Lilium michauxii Poir.
1	Linaria canadensis (L.) Dumont	Linaria canadensis (L.) Dumort.	7497062	EXACT	100	DOUBTFUL	SPECIES	Plantae	Tracheophyta	Magnoliopsida	Lamiales	Plantaginaceae	Linaria	Linaria canadensis	Linaria canadensis (L.) Dum.-Courset
1	Lindernia anagellidea (Michaux) Pennell	Lindernia anagallidea (Michx.) Pennell	3731578	FUZZY	98	SYNONYM	SPECIES	Plantae	Tracheophyta	Magnoliopsida	Lamiales	Linderniaceae	Lindernia	Lindernia dubia	Lindernia dubia (L.) Pennell
1	Lindernia dubia (L.) Pennell	Lindernia dubia (L.) Pennell	3171888	EXACT	100	ACCEPTED	SPECIES	Plantae	Tracheophyta	Magnoliopsida	Lamiales	Linderniaceae	Lindernia	Lindernia dubia	Lindernia dubia (L.) Pennell
1	Liquidambar styraciflua L.	Liquidambar styraciflua L.	3152824	EXACT	100	ACCEPTED	SPECIES	Plantae	Tracheophyta	Magnoliopsida	Saxifragales	Altingiaceae	Liquidambar	Liquidambar styraciflua	Liquidambar styraciflua L.
1	Liriodendron tulipifera L.	Liriodendron tulipifera L.	3152861	EXACT	100	ACCEPTED	SPECIES	Plantae	Tracheophyta	Magnoliopsida	Magnoliales	Magnoliaceae	Liriodendron	Liriodendron tulipifera	Liriodendron tulipifera L.
1	Lobelia cardinalis L.	Lobelia cardinalis L.	5408269	EXACT	100	ACCEPTED	SPECIES	Plantae	Tracheophyta	Magnoliopsida	Asterales	Campanulaceae	Lobelia	Lobelia cardinalis	Lobelia cardinalis L.
1	Lobelia puberula Michaux	Lobelia puberula Michx.	5408342	EXACT	100	ACCEPTED	SPECIES	Plantae	Tracheophyta	Magnoliopsida	Asterales	Campanulaceae	Lobelia	Lobelia puberula	Lobelia puberula Michx.
1	Lolium perenne L.	Lolium perenne L.	2706241	EXACT	100	ACCEPTED	SPECIES	Plantae	Tracheophyta	Liliopsida	Poales	Poaceae	Lolium	Lolium perenne	Lolium perenne L.
1	Lonicera japonica Thunb.	Lonicera japonica Thunb.	5334240	EXACT	100	ACCEPTED	SPECIES	Plantae	Tracheophyta	Magnoliopsida	Dipsacales	Caprifoliaceae	Lonicera	Lonicera japonica	Lonicera japonica Thunb.
1	Lonicera sempervirens L.	Lonicera sempervirens L.	5334239	EXACT	100	ACCEPTED	SPECIES	Plantae	Tracheophyta	Magnoliopsida	Dipsacales	Caprifoliaceae	Lonicera	Lonicera sempervirens	Lonicera sempervirens L.
1	Lorinseria areolata (L.) Presl	Lorinseria areolata C.Presl	2651516	EXACT	100	ACCEPTED	SPECIES	Plantae	Tracheophyta	Polypodiopsida	Polypodiales	Blechnaceae	Lorinseria	Lorinseria areolata	Lorinseria areolata C.Presl
1	Ludwigia alternifolia L.	Ludwigia alternifolia L.	5420992	EXACT	100	ACCEPTED	SPECIES	Plantae	Tracheophyta	Magnoliopsida	Myrtales	Onagraceae	Ludwigia	Ludwigia alternifolia	Ludwigia alternifolia L.
1	Ludwigia decurrens Walter	Ludwigia decurrens Walter	5421002	EXACT	100	ACCEPTED	SPECIES	Plantae	Tracheophyta	Magnoliopsida	Myrtales	Onagraceae	Ludwigia	Ludwigia decurrens	Ludwigia decurrens Walter
1	Ludwigia leptocarpa (Nutt.) Hara	Ludwigia leptocarpa (Nutt.) H.Hara	5421007	EXACT	100	ACCEPTED	SPECIES	Plantae	Tracheophyta	Magnoliopsida	Myrtales	Onagraceae	Ludwigia	Ludwigia leptocarpa	Ludwigia leptocarpa (Nutt.) H.Hara
1	Ludwigia linearis Walter	Ludwigia linearis Walter	5420989	EXACT	100	ACCEPTED	SPECIES	Plantae	Tracheophyta	Magnoliopsida	Myrtales	Onagraceae	Ludwigia	Ludwigia linearis	Ludwigia linearis Walter
1	Ludwigia palustris (L.) Elliott	Ludwigia palustris (L.) Elliott	5421025	EXACT	100	ACCEPTED	SPECIES	Plantae	Tracheophyta	Magnoliopsida	Myrtales	Onagraceae	Ludwigia	Ludwigia palustris	Ludwigia palustris (L.) Elliott
1	Luzula bulbosa (Alph. Wood) Rydberg	Luzula bulbosa (Wood) Rydb.	8213964	EXACT	100	SYNONYM	SPECIES	Plantae	Tracheophyta	Liliopsida	Poales	Juncaceae	Luzula	Luzula bulbosa	Luzula bulbosa (Alph.Wood) Smyth & L.C.Smyth
1	Luzula echinata (Small) Hermann	Luzula echinata (Small) F.J.Herm.	2701010	EXACT	100	ACCEPTED	SPECIES	Plantae	Tracheophyta	Liliopsida	Poales	Juncaceae	Luzula	Luzula echinata	Luzula echinata (Small) F.J.Herm.
1	Lycopus virginicus L.	Lycopus virginicus L.	5341476	EXACT	100	ACCEPTED	SPECIES	Plantae	Tracheophyta	Magnoliopsida	Lamiales	Lamiaceae	Lycopus	Lycopus virginicus	Lycopus virginicus L.
1	Lysimachia ciliata L.	Lysimachia ciliata L.	3169391	EXACT	100	ACCEPTED	SPECIES	Plantae	Tracheophyta	Magnoliopsida	Ericales	Primulaceae	Lysimachia	Lysimachia ciliata	Lysimachia ciliata L.
1	Magnolia grandifolia L. (planted)	Magnolia grandiflora L.	9605163	FUZZY	96	ACCEPTED	SPECIES	Plantae	Tracheophyta	Magnoliopsida	Magnoliales	Magnoliaceae	Magnolia	Magnolia grandiflora	Magnolia grandiflora L.
1	Magnolia tripetala L.	Magnolia tripetala L.	3153215	EXACT	100	ACCEPTED	SPECIES	Plantae	Tracheophyta	Magnoliopsida	Magnoliales	Magnoliaceae	Magnolia	Magnolia tripetala	Magnolia tripetala L.
1	Smilacina racemosa (L.) Desf.	Smilacina racemosa (L.) Desf.	2769490	EXACT	100	SYNONYM	SPECIES	Plantae	Tracheophyta	Liliopsida	Asparagales	Asparagaceae	Maianthemum	Maianthemum racemosum	Maianthemum racemosum Link
1	Matelea gonocarpa (Walter) Shinners	Matelea gonocarpa (Walt.) Shinners	3170527	EXACT	100	SYNONYM	SPECIES	Plantae	Tracheophyta	Magnoliopsida	Gentianales	Apocynaceae	Matelea	Matelea carolinensis	Matelea carolinensis (Jacq.) Woodson
1	Medicago arabica (L.) Hudson	Medicago arabica (L.) Huds.	2965527	EXACT	100	ACCEPTED	SPECIES	Plantae	Tracheophyta	Magnoliopsida	Fabales	Fabaceae	Medicago	Medicago arabica	Medicago arabica (L.) Huds.
1	Melia azedarach L.	Melia azedarach L.	5914287	EXACT	100	ACCEPTED	SPECIES	Plantae	Tracheophyta	Magnoliopsida	Sapindales	Meliaceae	Melia	Melia azedarach	Melia azedarach L.
1	Melothria pendula L.	Melothria pendula L.	2874550	EXACT	100	ACCEPTED	SPECIES	Plantae	Tracheophyta	Magnoliopsida	Cucurbitales	Cucurbitaceae	Melothria	Melothria pendula	Melothria pendula L.
1	Saxifraga virginiensis Michaux	Saxifraga virginiensis Michx.	3032764	EXACT	100	SYNONYM	SPECIES	Plantae	Tracheophyta	Magnoliopsida	Saxifragales	Saxifragaceae	Micranthes	Micranthes virginiensis	Micranthes virginiensis Small
1	Eulalia viminea (Trinius) Kuntze	Eulalia viminea (Trin.) Kuntze	5289809	EXACT	100	SYNONYM	SPECIES	Plantae	Tracheophyta	Liliopsida	Poales	Poaceae	Microstegium	Microstegium vimineum	Microstegium vimineum (Trin.) A.Camus
1	Mikania scandens (L.) Willd.	Mikania scandens Willd.	5398828	EXACT	100	ACCEPTED	SPECIES	Plantae	Tracheophyta	Magnoliopsida	Asterales	Asteraceae	Mikania	Mikania scandens	Mikania scandens Willd.
1	Schrankia microphylla (Sol. ex Smith) MacBride	Schrankia microphylla (Dryand.) J.F.Macbr.	5358382	EXACT	99	SYNONYM	SPECIES	Plantae	Tracheophyta	Magnoliopsida	Fabales	Fabaceae	Mimosa	Mimosa quadrivalvis	Mimosa quadrivalvis L.
1	Mimulus alatus Aiton	Mimulus alatus Aiton	6070769	EXACT	100	DOUBTFUL	SPECIES	Plantae	Tracheophyta	Magnoliopsida	Lamiales	Phrymaceae	Mimulus	Mimulus alatus	Mimulus alatus Soland.
1	Mitchella repens L.	Mitchella repens L.	5338762	EXACT	100	ACCEPTED	SPECIES	Plantae	Tracheophyta	Magnoliopsida	Gentianales	Rubiaceae	Mitchella	Mitchella repens	Mitchella repens L.
1	Modiola caroliniana (L.) G. Don	Modiola caroliniana (L.) G.Don	8338793	EXACT	100	ACCEPTED	SPECIES	Plantae	Tracheophyta	Magnoliopsida	Malvales	Malvaceae	Modiola	Modiola caroliniana	Modiola caroliniana (L.) G.Don
1	Mollugo verticillata L.	Mollugo verticillata L.	3084611	EXACT	100	ACCEPTED	SPECIES	Plantae	Tracheophyta	Magnoliopsida	Caryophyllales	Molluginaceae	Mollugo	Mollugo verticillata	Mollugo verticillata L.
1	Monotropa uniflora L.	Monotropa uniflora L.	2888353	EXACT	100	ACCEPTED	SPECIES	Plantae	Tracheophyta	Magnoliopsida	Ericales	Ericaceae	Monotropa	Monotropa uniflora	Monotropa uniflora L.
1	Myrica cerifera L.	Myrica cerifera L.	5414216	EXACT	100	SYNONYM	SPECIES	Plantae	Tracheophyta	Magnoliopsida	Fagales	Myricaceae	Morella	Morella cerifera	Morella cerifera Small
1	Morus rubra L.	Morus rubra L.	5361886	EXACT	100	ACCEPTED	SPECIES	Plantae	Tracheophyta	Magnoliopsida	Rosales	Moraceae	Morus	Morus rubra	Morus rubra L.
1	Muhlenbergia capillaris (Lam.) Trinis	Muhlenbergia capillaris Trin.	2704016	EXACT	100	ACCEPTED	SPECIES	Plantae	Tracheophyta	Liliopsida	Poales	Poaceae	Muhlenbergia	Muhlenbergia capillaris	Muhlenbergia capillaris Trin.
1	Murdannia keisak (Hasskarl) Hand.-Mazz.	Murdannia keisak (Hassk.) Hand.-Mazz.	2764809	EXACT	100	ACCEPTED	SPECIES	Plantae	Tracheophyta	Liliopsida	Commelinales	Commelinaceae	Murdannia	Murdannia keisak	Murdannia keisak (Hassk.) Hand.-Mazz.
1	Muscari racemosum (L.) Miller M	Muscari racemosum (L.) Mill.	7977586	EXACT	100	ACCEPTED	SPECIES	Plantae	Tracheophyta	Liliopsida	Asparagales	Asparagaceae	Muscari	Muscari racemosum	Muscari racemosum (L.) Mill.
1	Myriophyllum aquaticum (Vell.) Verdc.	Myriophyllum aquaticum (Vell.) Verdc.	5361785	EXACT	100	ACCEPTED	SPECIES	Plantae	Tracheophyta	Magnoliopsida	Saxifragales	Haloragaceae	Myriophyllum	Myriophyllum aquaticum	Myriophyllum aquaticum (Vell.) Verdc.
1	Cheilanthes lanosa (Michaux) D.C. Eaton	Cheilanthes lanosa (Michx.) D.C.Eat.	8226150	EXACT	100	SYNONYM	SPECIES	Plantae	Tracheophyta	Polypodiopsida	Polypodiales	Pteridaceae	Myriopteris	Myriopteris lanosa	Myriopteris lanosa (Michx.) Grusz & Windham
1	Prenanthes altissima L.	Prenanthes altissima L.	3090756	EXACT	100	SYNONYM	SPECIES	Plantae	Tracheophyta	Magnoliopsida	Asterales	Asteraceae	Nabalus	Nabalus altissima	Nabalus altissima Hook.
1	Prenanthes serpentaria Pursh	Prenanthes serpentaria Pursh	3090770	EXACT	100	SYNONYM	SPECIES	Plantae	Tracheophyta	Magnoliopsida	Asterales	Asteraceae	Nabalus	Nabalus serpentarius	Nabalus serpentarius Hook.
1	Najas minor All.	Najas minor All.	5329434	EXACT	100	ACCEPTED	SPECIES	Plantae	Tracheophyta	Liliopsida	Alismatales	Hydrocharitaceae	Najas	Najas minor	Najas minor All.
1	Narcissus pseudo-narcissus L.	Narcissus pseudonarcissus L.	2858244	FUZZY	99	ACCEPTED	SPECIES	Plantae	Tracheophyta	Liliopsida	Asparagales	Amaryllidaceae	Narcissus	Narcissus pseudonarcissus	Narcissus pseudonarcissus L.
1	Allium bivalve (L.) Kuntze	Allium bivalve (L.) Kuntze	2855601	EXACT	100	SYNONYM	SPECIES	Plantae	Tracheophyta	Liliopsida	Asparagales	Amaryllidaceae	Nothoscordum	Nothoscordum bivalve	Nothoscordum bivalve Britton
1	Nuphar luteum (L.) Sibthorp and Smith	Nuphar lutea Sibth. & Sm.	7551339	FUZZY	99	ACCEPTED	SPECIES	Plantae	Tracheophyta	Magnoliopsida	Nymphaeales	Nymphaeaceae	Nuphar	Nuphar lutea	Nuphar lutea Sibth. & Sm.
1	Nymphaea odorata Aiton	Nymphaea odorata Aiton	2882412	EXACT	100	ACCEPTED	SPECIES	Plantae	Tracheophyta	Magnoliopsida	Nymphaeales	Nymphaeaceae	Nymphaea	Nymphaea odorata	Nymphaea odorata Aiton
1	Nyssa sylvatica Marshall	Nyssa sylvatica Marshall	5383717	EXACT	100	ACCEPTED	SPECIES	Plantae	Tracheophyta	Magnoliopsida	Cornales	Nyssaceae	Nyssa	Nyssa sylvatica	Nyssa sylvatica Marshall
1	Oenothera laciniata Hill	Oenothera laciniata Hill	3188867	EXACT	100	ACCEPTED	SPECIES	Plantae	Tracheophyta	Magnoliopsida	Myrtales	Onagraceae	Oenothera	Oenothera laciniata	Oenothera laciniata Hill
1	Oenothera speciosa Nutt.	Oenothera speciosa Nutt.	3188859	EXACT	100	ACCEPTED	SPECIES	Plantae	Tracheophyta	Magnoliopsida	Myrtales	Onagraceae	Oenothera	Oenothera speciosa	Oenothera speciosa Nutt.
1	Onoclea sensibilis L.	Onoclea sensibilis L.	2650903	EXACT	100	ACCEPTED	SPECIES	Plantae	Tracheophyta	Polypodiopsida	Polypodiales	Onocleaceae	Onoclea	Onoclea sensibilis	Onoclea sensibilis L.
1	Opuntia humifusa Raf.	Opuntia humifusa Raf.	5384047	EXACT	100	ACCEPTED	SPECIES	Plantae	Tracheophyta	Magnoliopsida	Caryophyllales	Cactaceae	Opuntia	Opuntia humifusa	Opuntia humifusa Raf.
1	Osmunda regalis L. var. spectabilis (Willd.) Gray	Osmunda regalis var. spectabilis (Willd.) A.Gray	6425048	EXACT	100	SYNONYM	VARIETY	Plantae	Tracheophyta	Polypodiopsida	Osmundales	Osmundaceae	Osmunda	Osmunda spectabilis	Osmunda spectabilis Willd.
1	Osmunda cinnamomea L.	Osmunda cinnamomea L.	2651326	EXACT	100	SYNONYM	SPECIES	Plantae	Tracheophyta	Polypodiopsida	Osmundales	Osmundaceae	Osmundastrum	Osmundastrum cinnamomeum	Osmundastrum cinnamomeum (L.) C.Presl
1	Ostrya virginiana (Miller) K. Koch	Ostrya virginiana K.Koch	5332289	EXACT	100	ACCEPTED	SPECIES	Plantae	Tracheophyta	Magnoliopsida	Fagales	Betulaceae	Ostrya	Ostrya virginiana	Ostrya virginiana K.Koch
1	Oxalis rubra J. St. Hil.	Oxalis rubra A.St.-Hil.	2891727	EXACT	82	SYNONYM	SPECIES	Plantae	Tracheophyta	Magnoliopsida	Oxalidales	Oxalidaceae	Oxalis	Oxalis articulata	Oxalis articulata Savign.
1	Oxalis florida Salisb. ssp. prostrata (Haw.) Lourteig	Oxalis florida subsp. prostrata (Haw.) A.Lourteig	9823071	EXACT	100	SYNONYM	SUBSPECIES	Plantae	Tracheophyta	Magnoliopsida	Oxalidales	Oxalidaceae	Oxalis	Oxalis corniculata	Oxalis corniculata L.
1	Oxalis dillenii Jacq.	Oxalis dillenii Jacq.	2891677	EXACT	100	ACCEPTED	SPECIES	Plantae	Tracheophyta	Magnoliopsida	Oxalidales	Oxalidaceae	Oxalis	Oxalis dillenii	Oxalis dillenii Jacq.
1	Oxydendrum arboreum (L.) DC.	Oxydendrum arboreum DC.	2882708	EXACT	100	ACCEPTED	SPECIES	Plantae	Tracheophyta	Magnoliopsida	Ericales	Ericaceae	Oxydendrum	Oxydendrum arboreum	Oxydendrum arboreum DC.
1	Senecio anonymus Alph. Wood	Senecio anonymus A.Wood.	3107474	EXACT	100	SYNONYM	SPECIES	Plantae	Tracheophyta	Magnoliopsida	Asterales	Asteraceae	Packera	Packera anonyma	Packera anonyma (Wood) W.A.Weber & √Å.L√∂ve
1	Panicum boscii Poiret	Panicum boscii Poir.	2702589	EXACT	100	ACCEPTED	SPECIES	Plantae	Tracheophyta	Liliopsida	Poales	Poaceae	Panicum	Panicum boscii	Panicum boscii Poir.
1	Panicum clandestinum L.	Panicum clandestinum L.	2702544	EXACT	100	ACCEPTED	SPECIES	Plantae	Tracheophyta	Liliopsida	Poales	Poaceae	Panicum	Panicum clandestinum	Panicum clandestinum L.
1	Panicum commutatum Schultes var. ashei Fern.	Panicum commutatum var. ashei (T.G.Pearson ex Ashe) Fernald	2702611	EXACT	100	SYNONYM	VARIETY	Plantae	Tracheophyta	Liliopsida	Poales	Poaceae	Panicum	Panicum commutatum	Panicum commutatum Schult.
1	Panicum commutatum Schultes var. cornmutatum	Panicum commutatum Schult.	2702607	HIGHERRANK	97	ACCEPTED	SPECIES	Plantae	Tracheophyta	Liliopsida	Poales	Poaceae	Panicum	Panicum commutatum	Panicum commutatum Schult.
1	Panicum depauperatum Muhl.	Panicum depauperatum Muhl.	2702595	EXACT	100	ACCEPTED	SPECIES	Plantae	Tracheophyta	Liliopsida	Poales	Poaceae	Panicum	Panicum depauperatum	Panicum depauperatum Muhl.
1	Panicum dichotomum L. var. dichotomum	Panicum dichotomum var. dichotomum	7913485	EXACT	98	SYNONYM	VARIETY	Plantae	Tracheophyta	Liliopsida	Poales	Poaceae	Panicum	Panicum dichotomum	Panicum dichotomum L.
1	Panicum dichotomum L. var. ramulosum (Torrey) LeLong	Panicum dichotomum var. ramulosum (Torr.) Lelong	4148361	EXACT	100	SYNONYM	VARIETY	Plantae	Tracheophyta	Liliopsida	Poales	Poaceae	Panicum	Panicum dichotomum	Panicum dichotomum L.
1	Panicum laxiflorum Lam.	Panicum laxiflorum Lam.	2702598	EXACT	100	ACCEPTED	SPECIES	Plantae	Tracheophyta	Liliopsida	Poales	Poaceae	Panicum	Panicum laxiflorum	Panicum laxiflorum Lam.
1	Panicum scoparium Lam.	Panicum scoparium Lam.	8240850	EXACT	100	ACCEPTED	SPECIES	Plantae	Tracheophyta	Liliopsida	Poales	Poaceae	Panicum	Panicum scoparium	Panicum scoparium Lam.
1	Panicum virgatum L.	Panicum virgatum L.	2705081	EXACT	100	ACCEPTED	SPECIES	Plantae	Tracheophyta	Liliopsida	Poales	Poaceae	Panicum	Panicum virgatum	Panicum virgatum L.
1	Parthenocissus quinquefolia (L.) Planchon	Parthenocissus quinquefolia (L.) Planch.	3039194	EXACT	100	ACCEPTED	SPECIES	Plantae	Tracheophyta	Magnoliopsida	Vitales	Vitaceae	Parthenocissus	Parthenocissus quinquefolia	Parthenocissus quinquefolia (L.) Planch.
1	Paspalum dilatatum Poiret	Paspalum dilatatum Poir.	2705565	EXACT	100	ACCEPTED	SPECIES	Plantae	Tracheophyta	Liliopsida	Poales	Poaceae	Paspalum	Paspalum dilatatum	Paspalum dilatatum Poir.
1	Paspalum urvillei Steudel	Paspalum urvillei Steud.	2705650	EXACT	100	ACCEPTED	SPECIES	Plantae	Tracheophyta	Liliopsida	Poales	Poaceae	Paspalum	Paspalum urvillei	Paspalum urvillei Steud.
1	Passiflora edulis Sims	Passiflora edulis Sims	2874190	EXACT	100	ACCEPTED	SPECIES	Plantae	Tracheophyta	Magnoliopsida	Malpighiales	Passifloraceae	Passiflora	Passiflora edulis	Passiflora edulis Sims
1	Passiflora lutea L.	Passiflora lutea L.	2874220	EXACT	100	ACCEPTED	SPECIES	Plantae	Tracheophyta	Magnoliopsida	Malpighiales	Passifloraceae	Passiflora	Passiflora lutea	Passiflora lutea L.
1	Paulownia tomentosa (Thunb.) Steudel	Paulownia tomentosa Steud.	3170823	EXACT	100	ACCEPTED	SPECIES	Plantae	Tracheophyta	Magnoliopsida	Lamiales	Paulowniaceae	Paulownia	Paulownia tomentosa	Paulownia tomentosa Steud.
1	Pellaea atropurpurea (L.) Link	Pellaea atropurpurea (L.) Link.	5275441	EXACT	100	ACCEPTED	SPECIES	Plantae	Tracheophyta	Polypodiopsida	Polypodiales	Pteridaceae	Pellaea	Pellaea atropurpurea	Pellaea atropurpurea (L.) Link.
1	Peltandra virginica (L.) Kunth	Peltandra virginica Kunth	8179586	EXACT	100	DOUBTFUL	SPECIES	Plantae	Tracheophyta	Liliopsida	Alismatales	Araceae	Peltandra	Peltandra virginica	Peltandra virginica Schott
1	Penstemon australis Small	Penstemon australis Small	3171553	EXACT	100	ACCEPTED	SPECIES	Plantae	Tracheophyta	Magnoliopsida	Lamiales	Plantaginaceae	Penstemon	Penstemon australis	Penstemon australis Small
1	Penstemon laevigatus Sol. ex Aiton	Penstemon laevigatus Ait.	3171542	EXACT	100	ACCEPTED	SPECIES	Plantae	Tracheophyta	Magnoliopsida	Lamiales	Plantaginaceae	Penstemon	Penstemon laevigatus	Penstemon laevigatus Ait.
1	Penthorum sedoides L.	Penthorum sedoides L.	2985709	EXACT	100	ACCEPTED	SPECIES	Plantae	Tracheophyta	Magnoliopsida	Saxifragales	Penthoraceae	Penthorum	Penthorum sedoides	Penthorum sedoides L.
1	Perilla frutescens (L.) Britton	Perilla frutescens Britton.	5341394	EXACT	100	ACCEPTED	SPECIES	Plantae	Tracheophyta	Magnoliopsida	Lamiales	Lamiaceae	Perilla	Perilla frutescens	Perilla frutescens Britton.
1	Polygonum hydropiperoides Michaux	Polygonum hydropiperoides Michx.	5334468	EXACT	100	SYNONYM	SPECIES	Plantae	Tracheophyta	Magnoliopsida	Caryophyllales	Polygonaceae	Persicaria	Persicaria hydropiperoides	Persicaria hydropiperoides Small
1	Polygonum lapathifolium L.	Polygonum lapathifolium L.	7762353	EXACT	100	SYNONYM	SPECIES	Plantae	Tracheophyta	Magnoliopsida	Caryophyllales	Polygonaceae	Persicaria	Persicaria lapathifolia	Persicaria lapathifolia (L.) Gray
1	Polygonum caespitosum Blume var. longisetum (DeBruyn) Steward	Polygonum caespitosum var. longisetum (De Bruyn) Steward	5651844	EXACT	99	SYNONYM	VARIETY	Plantae	Tracheophyta	Magnoliopsida	Caryophyllales	Polygonaceae	Persicaria	Persicaria longiseta	Persicaria longiseta (Bruijn) Kitag.
1	Polygonum pensylvanicum L.	Polygonum pensylvanicum L.	5334366	EXACT	100	SYNONYM	SPECIES	Plantae	Tracheophyta	Magnoliopsida	Caryophyllales	Polygonaceae	Persicaria	Persicaria pensylvanica	Persicaria pensylvanica (L.) M.G√≥mez
1	Polygonum sagittatum L.	Polygonum sagittatum L.	5334307	EXACT	100	SYNONYM	SPECIES	Plantae	Tracheophyta	Magnoliopsida	Caryophyllales	Polygonaceae	Persicaria	Persicaria sagittata	Persicaria sagittata (L.) H.Gross
1	Polygonum setaceum Baldwin ex Elliott	Polygonum setaceum Baldw. ex Ell.	8220871	EXACT	100	SYNONYM	SPECIES	Plantae	Tracheophyta	Magnoliopsida	Caryophyllales	Polygonaceae	Persicaria	Persicaria setacea	Persicaria setacea Small
1	Polygonum virginianum L.	Polygonum virginianum L.	5334466	EXACT	100	SYNONYM	SPECIES	Plantae	Tracheophyta	Magnoliopsida	Caryophyllales	Polygonaceae	Persicaria	Persicaria virginiana	Persicaria virginiana (L.) Gaertn.
1	Phacelia dubia (L.) Trelease	Phacelia dubia (L.) Trel. & Small	2928259	EXACT	100	ACCEPTED	SPECIES	Plantae	Tracheophyta	Magnoliopsida	Boraginales	Hydrophyllaceae	Phacelia	Phacelia dubia	Phacelia dubia (L.) Trel. & Small
1	Thelypteris hexagonoptera (Michaux) Weatherby	Thelypteris hexagonoptera (Michx.) Weath.	5275217	EXACT	100	SYNONYM	SPECIES	Plantae	Tracheophyta	Polypodiopsida	Polypodiales	Thelypteridaceae	Phegopteris	Phegopteris hexagonoptera	Phegopteris hexagonoptera F√©e
1	Phlox carolina L.	Phlox carolina L.	2927756	EXACT	100	ACCEPTED	SPECIES	Plantae	Tracheophyta	Magnoliopsida	Ericales	Polemoniaceae	Phlox	Phlox carolina	Phlox carolina L.
1	Phoradendron flavescens (Pursh) Nutt.	Phoradendron flavescens (Pursh) Nutt.	7738544	EXACT	100	SYNONYM	SPECIES	Plantae	Tracheophyta	Magnoliopsida	Santalales	Santalaceae	Phoradendron	Phoradendron leucarpum	Phoradendron leucarpum (Raf.) Reveal & M.C.Johnst.
1	Phryma leptostachya L.	Phryma leptostachya L.	2925445	EXACT	100	ACCEPTED	SPECIES	Plantae	Tracheophyta	Magnoliopsida	Lamiales	Phrymaceae	Phryma	Phryma leptostachya	Phryma leptostachya L.
1	Phyllostachys aurea Riv.	Phyllostachys aurea Riviere & C.Riviere	5290167	EXACT	100	ACCEPTED	SPECIES	Plantae	Tracheophyta	Liliopsida	Poales	Poaceae	Phyllostachys	Phyllostachys aurea	Phyllostachys aurea Riviere & C.Riviere
1	Physalis angulata L.	Physalis angulata L.	5341792	EXACT	100	ACCEPTED	SPECIES	Plantae	Tracheophyta	Magnoliopsida	Solanales	Solanaceae	Physalis	Physalis angulata	Physalis angulata L.
1	Phytolacca americana L.	Phytolacca americana L.	3084015	EXACT	100	ACCEPTED	SPECIES	Plantae	Tracheophyta	Magnoliopsida	Caryophyllales	Phytolaccaceae	Phytolacca	Phytolacca americana	Phytolacca americana L.
1	Pilea pumila (L.) A. Gray	Pilea pumila A.Gray	5361818	EXACT	100	ACCEPTED	SPECIES	Plantae	Tracheophyta	Magnoliopsida	Rosales	Urticaceae	Pilea	Pilea pumila	Pilea pumila A.Gray
1	Hieracium venosum L.	Hieracium venosum L.	3135852	EXACT	100	SYNONYM	SPECIES	Plantae	Tracheophyta	Magnoliopsida	Asterales	Asteraceae	Pilosella	Pilosella venosa	Pilosella venosa F.W.Schultz & Sch.Bip.
1	Pinus echinata Miller	Pinus echinata Mill.	5285324	EXACT	100	ACCEPTED	SPECIES	Plantae	Tracheophyta	Pinopsida	Pinales	Pinaceae	Pinus	Pinus echinata	Pinus echinata Mill.
1	Pinus palustris Miller	Pinus palustris Mill.	5285816	EXACT	100	ACCEPTED	SPECIES	Plantae	Tracheophyta	Pinopsida	Pinales	Pinaceae	Pinus	Pinus palustris	Pinus palustris Mill.
1	Pinus strobus L. (planted)	Pinus strobus L.	5284982	EXACT	100	ACCEPTED	SPECIES	Plantae	Tracheophyta	Pinopsida	Pinales	Pinaceae	Pinus	Pinus strobus	Pinus strobus L.
1	Pinus taeda L.	Pinus taeda L.	5285241	EXACT	100	ACCEPTED	SPECIES	Plantae	Tracheophyta	Pinopsida	Pinales	Pinaceae	Pinus	Pinus taeda	Pinus taeda L.
1	Stipa avenacea L.	Stipa avenacea L.	8018608	EXACT	100	SYNONYM	SPECIES	Plantae	Tracheophyta	Liliopsida	Poales	Poaceae	Piptochaetium	Piptochaetium avenaceum	Piptochaetium avenaceum (L.) Parodi
1	Pityopsis aspera (Shuttlew.) Small	Pityopsis aspera (A.Gray) Small	6444720	EXACT	100	ACCEPTED	SPECIES	Plantae	Tracheophyta	Magnoliopsida	Asterales	Asteraceae	Pityopsis	Pityopsis aspera	Pityopsis aspera (A.Gray) Small
1	Plantago aristata Michaux	Plantago aristata Michx.	3189696	EXACT	100	ACCEPTED	SPECIES	Plantae	Tracheophyta	Magnoliopsida	Lamiales	Plantaginaceae	Plantago	Plantago aristata	Plantago aristata Michx.
1	Plantago lanceolata L.	Plantago lanceolata L.	8208358	EXACT	100	ACCEPTED	SPECIES	Plantae	Tracheophyta	Magnoliopsida	Lamiales	Plantaginaceae	Plantago	Plantago lanceolata	Plantago lanceolata L.
1	Plantago virginica L.	Plantago virginica L.	3189751	EXACT	100	ACCEPTED	SPECIES	Plantae	Tracheophyta	Magnoliopsida	Lamiales	Plantaginaceae	Plantago	Plantago virginica	Plantago virginica L.
1	Platanus occidentalis L.	Platanus occidentalis L.	3152820	EXACT	100	ACCEPTED	SPECIES	Plantae	Tracheophyta	Magnoliopsida	Proteales	Platanaceae	Platanus	Platanus occidentalis	Platanus occidentalis L.
1	Polypodium polypodioides (L.) Watt	Polypodium polypodioides (L.) Watt.	6389739	EXACT	100	SYNONYM	SPECIES	Plantae	Tracheophyta	Polypodiopsida	Polypodiales	Polypodiaceae	Pleopeltis	Pleopeltis polypodioides	Pleopeltis polypodioides (L.) E.G.Andrews & Windham
1	Pluchea camphorata (L.) DC.	Pluchea camphorata (L.) DC.	3132651	EXACT	100	ACCEPTED	SPECIES	Plantae	Tracheophyta	Magnoliopsida	Asterales	Asteraceae	Pluchea	Pluchea camphorata	Pluchea camphorata (L.) DC.
1	Poa annua L.	Poa annua L.	2704179	EXACT	100	ACCEPTED	SPECIES	Plantae	Tracheophyta	Liliopsida	Poales	Poaceae	Poa	Poa annua	Poa annua L.
1	Poa sylvestris Gray	Poa sylvestris A.Gray	2704184	EXACT	100	ACCEPTED	SPECIES	Plantae	Tracheophyta	Liliopsida	Poales	Poaceae	Poa	Poa sylvestris	Poa sylvestris A.Gray
1	Podophyllum peltatum L.	Podophyllum peltatum L.	3033839	EXACT	100	ACCEPTED	SPECIES	Plantae	Tracheophyta	Magnoliopsida	Ranunculales	Berberidaceae	Podophyllum	Podophyllum peltatum	Podophyllum peltatum L.
1	Polygala polygama Walter	Polygala polygama Walter	3191425	EXACT	100	ACCEPTED	SPECIES	Plantae	Tracheophyta	Magnoliopsida	Fabales	Polygalaceae	Polygala	Polygala polygama	Polygala polygama Walter
1	Polygonatum biflorum (Walter) Elliott	Polygonatum biflorum Elliott	2770039	EXACT	100	ACCEPTED	SPECIES	Plantae	Tracheophyta	Liliopsida	Asparagales	Asparagaceae	Polygonatum	Polygonatum biflorum	Polygonatum biflorum Elliott
1	Polypremum procumbens L.	Polypremum procumbens L.	5415472	EXACT	100	ACCEPTED	SPECIES	Plantae	Tracheophyta	Magnoliopsida	Lamiales	Tetrachondraceae	Polypremum	Polypremum procumbens	Polypremum procumbens L.
1	Polystichum acrostichoides (Michaux) Schott	Polystichum acrostichoides (Michx.) Schott	2651098	EXACT	100	ACCEPTED	SPECIES	Plantae	Tracheophyta	Polypodiopsida	Polypodiales	Dryopteridaceae	Polystichum	Polystichum acrostichoides	Polystichum acrostichoides (Michx.) Schott
1	Populus deltoides Marshall	Populus deltoides W.Bartram ex Marshall	3040232	EXACT	100	ACCEPTED	SPECIES	Plantae	Tracheophyta	Magnoliopsida	Malpighiales	Salicaceae	Populus	Populus deltoides	Populus deltoides W.Bartram ex Marshall
1	Potamogeton diversifolius Raf. var. tricophyllus Morong	Potamogeton diversifolius var. trichophyllus Morong	5301230	FUZZY	98	SYNONYM	VARIETY	Plantae	Tracheophyta	Liliopsida	Alismatales	Potamogetonaceae	Potamogeton	Potamogeton bicupulatus	Potamogeton bicupulatus Fernald
1	Potentilla canadensis L.	Potentilla canadensis L.	5368951	EXACT	100	ACCEPTED	SPECIES	Plantae	Tracheophyta	Magnoliopsida	Rosales	Rosaceae	Potentilla	Potentilla canadensis	Potentilla canadensis L.
1	Potentilla simplex Michaux	Potentilla simplex Michx.	5368059	EXACT	100	ACCEPTED	SPECIES	Plantae	Tracheophyta	Magnoliopsida	Rosales	Rosaceae	Potentilla	Potentilla simplex	Potentilla simplex Michx.
1	Prunella vulgaris L.	Prunella vulgaris L.	5341297	EXACT	100	ACCEPTED	SPECIES	Plantae	Tracheophyta	Magnoliopsida	Lamiales	Lamiaceae	Prunella	Prunella vulgaris	Prunella vulgaris L.
1	Prunus caroliniana Aiton	Prunus caroliniana (Mill.) Aiton	3023558	EXACT	100	ACCEPTED	SPECIES	Plantae	Tracheophyta	Magnoliopsida	Rosales	Rosaceae	Prunus	Prunus caroliniana	Prunus caroliniana (Mill.) Aiton
1	Prunus serotina Ehrh.	Prunus serotina Ehrh.	3021850	EXACT	100	ACCEPTED	SPECIES	Plantae	Tracheophyta	Magnoliopsida	Rosales	Rosaceae	Prunus	Prunus serotina	Prunus serotina Ehrh.
1	Gnaphalium helleri Britton	Gnaphalium helleri Britt.	6064083	EXACT	100	SYNONYM	SPECIES	Plantae	Tracheophyta	Magnoliopsida	Asterales	Asteraceae	Pseudognaphalium	Pseudognaphalium helleri	Pseudognaphalium helleri (Britton) Anderb.
1	Gnaphalium obtusifolium L.	Gnaphalium obtusifolium L.	5390165	EXACT	100	SYNONYM	SPECIES	Plantae	Tracheophyta	Magnoliopsida	Asterales	Asteraceae	Pseudognaphalium	Pseudognaphalium obtusifolium	Pseudognaphalium obtusifolium (L.) Hilliard & B.L.Burtt
1	Pteridium aquilinum (L.) Kuhn	Pteridium aquilinum (L.) Kuhn	5275012	EXACT	100	ACCEPTED	SPECIES	Plantae	Tracheophyta	Polypodiopsida	Polypodiales	Dennstaedtiaceae	Pteridium	Pteridium aquilinum	Pteridium aquilinum (L.) Kuhn
1	Ptilimnium capillaceum (Michaux) Raf.	Ptilimnium capillaceum Raf.	8184378	EXACT	100	ACCEPTED	SPECIES	Plantae	Tracheophyta	Magnoliopsida	Apiales	Apiaceae	Ptilimnium	Ptilimnium capillaceum	Ptilimnium capillaceum Raf.
1	Pueraria lobata (Willd.) Ohwi	Pueraria lobata (Willd.) Ohwi	2977654	EXACT	100	SYNONYM	SPECIES	Plantae	Tracheophyta	Magnoliopsida	Fabales	Fabaceae	Pueraria	Pueraria montana	Pueraria montana (Lour.) Merr.
1	Pycnanthemum incanum (L.) Michaux	Pycnanthemum incanum (L.) Michx.	2927354	EXACT	100	ACCEPTED	SPECIES	Plantae	Tracheophyta	Magnoliopsida	Lamiales	Lamiaceae	Pycnanthemum	Pycnanthemum incanum	Pycnanthemum incanum (L.) Michx.
1	Pyrrhopappus carolinianus (Walter) DC.	Pyrrhopappus carolinianus DC.	3145236	EXACT	100	ACCEPTED	SPECIES	Plantae	Tracheophyta	Magnoliopsida	Asterales	Asteraceae	Pyrrhopappus	Pyrrhopappus carolinianus	Pyrrhopappus carolinianus DC.
1	Quercus alba L.	Quercus alba L.	2879737	EXACT	100	ACCEPTED	SPECIES	Plantae	Tracheophyta	Magnoliopsida	Fagales	Fagaceae	Quercus	Quercus alba	Quercus alba L.
1	Quercus coccinea Muenchh.	Quercus coccinea M√ºnchh.	8326061	EXACT	100	ACCEPTED	SPECIES	Plantae	Tracheophyta	Magnoliopsida	Fagales	Fagaceae	Quercus	Quercus coccinea	Quercus coccinea M√ºnchh.
1	Quercus falcata Michaux	Quercus falcata Michx.	2880967	EXACT	100	ACCEPTED	SPECIES	Plantae	Tracheophyta	Magnoliopsida	Fagales	Fagaceae	Quercus	Quercus falcata	Quercus falcata Michx.
1	Quercus hemisphaerica Bartram ex. Willd.	Quercus hemisphaerica W.Bartram ex Willd.	2877348	EXACT	100	ACCEPTED	SPECIES	Plantae	Tracheophyta	Magnoliopsida	Fagales	Fagaceae	Quercus	Quercus hemisphaerica	Quercus hemisphaerica W.Bartram ex Willd.
1	Quercus michauxii Nutt.	Quercus michauxii Nutt.	2880340	EXACT	100	ACCEPTED	SPECIES	Plantae	Tracheophyta	Magnoliopsida	Fagales	Fagaceae	Quercus	Quercus michauxii	Quercus michauxii Nutt.
1	Quercus nigra L.	Quercus nigra L.	2879328	EXACT	100	ACCEPTED	SPECIES	Plantae	Tracheophyta	Magnoliopsida	Fagales	Fagaceae	Quercus	Quercus nigra	Quercus nigra L.
1	Quercus stellata Wangenh.	Quercus stellata Wangenh.	8879961	EXACT	100	ACCEPTED	SPECIES	Plantae	Tracheophyta	Magnoliopsida	Fagales	Fagaceae	Quercus	Quercus stellata	Quercus stellata Wangenh.
1	Quercus velutina Lam.	Quercus velutina Lam.	8086561	EXACT	100	ACCEPTED	SPECIES	Plantae	Tracheophyta	Magnoliopsida	Fagales	Fagaceae	Quercus	Quercus velutina	Quercus velutina Lam.
1	Ranunculus abortivus L.	Ranunculus abortivus L.	3033412	EXACT	100	ACCEPTED	SPECIES	Plantae	Tracheophyta	Magnoliopsida	Ranunculales	Ranunculaceae	Ranunculus	Ranunculus abortivus	Ranunculus abortivus L.
1	Ranunculus hispidus Michaux	Ranunculus hispidus Michx.	3033479	EXACT	100	ACCEPTED	SPECIES	Plantae	Tracheophyta	Magnoliopsida	Ranunculales	Ranunculaceae	Ranunculus	Ranunculus hispidus	Ranunculus hispidus Michx.
1	Ranunculus recurvatus Poiret	Ranunculus recurvatus Poir.	3033394	EXACT	100	ACCEPTED	SPECIES	Plantae	Tracheophyta	Magnoliopsida	Ranunculales	Ranunculaceae	Ranunculus	Ranunculus recurvatus	Ranunculus recurvatus Poir.
1	Ranunculus sardous Crantz	Ranunculus sardous Crantz	3033483	EXACT	100	ACCEPTED	SPECIES	Plantae	Tracheophyta	Magnoliopsida	Ranunculales	Ranunculaceae	Ranunculus	Ranunculus sardous	Ranunculus sardous Crantz
1	Rhexia mariana L.	Rhexia mariana L.	6370240	EXACT	100	ACCEPTED	SPECIES	Plantae	Tracheophyta	Magnoliopsida	Myrtales	Melastomataceae	Rhexia	Rhexia mariana	Rhexia mariana L.
1	Rhododendron canescens (Michaux) Sweet	Rhododendron canescens (Michx.) Sweet	2883039	EXACT	100	SYNONYM	SPECIES	Plantae	Tracheophyta	Magnoliopsida	Ericales	Ericaceae	Rhododendron	Rhododendron canescens	Rhododendron canescens G.Don
1	Rhododendron flammeum (Michaux) Sarg.	Rhododendron flammeum (Michx.) Sarg.	2883048	EXACT	100	ACCEPTED	SPECIES	Plantae	Tracheophyta	Magnoliopsida	Ericales	Ericaceae	Rhododendron	Rhododendron flammeum	Rhododendron flammeum (Michx.) Sarg.
1	Rhus copallina L.	Rhus copallina L.	3190557	EXACT	100	ACCEPTED	SPECIES	Plantae	Tracheophyta	Magnoliopsida	Sapindales	Anacardiaceae	Rhus	Rhus copallina	Rhus copallina L.
1	Rhus glabra L.	Rhus glabra L.	3190544	EXACT	100	ACCEPTED	SPECIES	Plantae	Tracheophyta	Magnoliopsida	Sapindales	Anacardiaceae	Rhus	Rhus glabra	Rhus glabra L.
1	Rhynchosia tomentosa (L.) Hook. & Arn.	Rhynchosia tomentosa Hook. & Arn.	5350721	EXACT	100	ACCEPTED	SPECIES	Plantae	Tracheophyta	Magnoliopsida	Fabales	Fabaceae	Rhynchosia	Rhynchosia tomentosa	Rhynchosia tomentosa Hook. & Arn.
1	Rhynchospora glomerata (L.) Vahl	Rhynchospora glomerata Vahl	2713065	EXACT	100	ACCEPTED	SPECIES	Plantae	Tracheophyta	Liliopsida	Poales	Cyperaceae	Rhynchospora	Rhynchospora glomerata	Rhynchospora glomerata Vahl
1	Robinia hispida L.	Robinia hispida L.	5352221	EXACT	100	ACCEPTED	SPECIES	Plantae	Tracheophyta	Magnoliopsida	Fabales	Fabaceae	Robinia	Robinia hispida	Robinia hispida L.
1	Robinia pseudoacacia L.	Robinia pseudoacacia L.	5352251	EXACT	100	ACCEPTED	SPECIES	Plantae	Tracheophyta	Magnoliopsida	Fabales	Fabaceae	Robinia	Robinia pseudoacacia	Robinia pseudoacacia L.
1	Rosa carolina L.	Rosa carolina L.	3006171	EXACT	100	ACCEPTED	SPECIES	Plantae	Tracheophyta	Magnoliopsida	Rosales	Rosaceae	Rosa	Rosa carolina	Rosa carolina L.
1	Rosa multiflora Thunb.	Rosa multiflora Thunb.	3003244	EXACT	100	ACCEPTED	SPECIES	Plantae	Tracheophyta	Magnoliopsida	Rosales	Rosaceae	Rosa	Rosa multiflora	Rosa multiflora Thunb.
1	Rubus argutus Link	Rubus argutus Link	2990801	EXACT	100	ACCEPTED	SPECIES	Plantae	Tracheophyta	Magnoliopsida	Rosales	Rosaceae	Rubus	Rubus argutus	Rubus argutus Link
1	Rubus betulifolius Small	Rubus betulifolius Small	2990803	EXACT	100	SYNONYM	SPECIES	Plantae	Tracheophyta	Magnoliopsida	Rosales	Rosaceae	Rubus	Rubus argutus	Rubus argutus Link
1	Rudbeckia hirta L.	Rudbeckia hirta L.	3114225	EXACT	100	ACCEPTED	SPECIES	Plantae	Tracheophyta	Magnoliopsida	Asterales	Asteraceae	Rudbeckia	Rudbeckia hirta	Rudbeckia hirta L.
1	Ruellia caroliniensis (J. Gmelin) Steudel	Ruellia caroliniensis (J.F.Gmel.) Steud.	5415376	EXACT	100	ACCEPTED	SPECIES	Plantae	Tracheophyta	Magnoliopsida	Lamiales	Acanthaceae	Ruellia	Ruellia caroliniensis	Ruellia caroliniensis (J.F.Gmel.) Steud.
1	Ruellia purshiana Fern.	Ruellia purshiana Fernald	5415381	EXACT	100	ACCEPTED	SPECIES	Plantae	Tracheophyta	Magnoliopsida	Lamiales	Acanthaceae	Ruellia	Ruellia purshiana	Ruellia purshiana Fernald
1	Rumex conglomeratus Murray	Rumex conglomeratus Murray	2888963	EXACT	100	ACCEPTED	SPECIES	Plantae	Tracheophyta	Magnoliopsida	Caryophyllales	Polygonaceae	Rumex	Rumex conglomeratus	Rumex conglomeratus Murray
1	Rumex crispus L.	Rumex crispus L.	8195144	EXACT	100	ACCEPTED	SPECIES	Plantae	Tracheophyta	Magnoliopsida	Caryophyllales	Polygonaceae	Rumex	Rumex crispus	Rumex crispus L.
1	Rumex hastatulus Baldwin ex Elliott	Rumex hastatulus Baldwin ex Elliott, 1817	7840099	EXACT	100	DOUBTFUL	SPECIES	Plantae	Tracheophyta	Magnoliopsida	Caryophyllales	Polygonaceae	Rumex	Rumex hastatulus	Rumex hastatulus Baldwin
1	Erianthus alopecuriodes (L.) Elliott	Erianthus alopecuroides (L.) Elliott	5289881	FUZZY	98	SYNONYM	SPECIES	Plantae	Tracheophyta	Liliopsida	Poales	Poaceae	Saccharum	Saccharum alopecuroides	Saccharum alopecuroides (L.) Nutt.
1	Erianthus contortus Baldwin ex Elliott	Erianthus contortus Baldwin ex Elliott	5677254	EXACT	100	SYNONYM	SPECIES	Plantae	Tracheophyta	Liliopsida	Poales	Poaceae	Saccharum	Saccharum contortum	Saccharum contortum (Elliott) Nutt.
1	Erianthus giganteus (Walter) Muhl.	Erianthus giganteus (Walter) Muhl.	7698500	EXACT	100	SYNONYM	SPECIES	Plantae	Tracheophyta	Liliopsida	Poales	Poaceae	Saccharum	Saccharum giganteum	Saccharum giganteum Pers.
1	Sacciolepis striata (L.) Nash	Sacciolepis striata Nash	2703628	EXACT	100	ACCEPTED	SPECIES	Plantae	Tracheophyta	Liliopsida	Poales	Poaceae	Sacciolepis	Sacciolepis striata	Sacciolepis striata Nash
1	Sagittaria engelmanniana J.G. Smith	Sagittaria engelmanniana J.G.Sm.	5328955	EXACT	100	ACCEPTED	SPECIES	Plantae	Tracheophyta	Liliopsida	Alismatales	Alismataceae	Sagittaria	Sagittaria engelmanniana	Sagittaria engelmanniana J.G.Sm.
1	Sagittaria latifolia Willd.	Sagittaria latifolia Willd.	5328909	EXACT	100	ACCEPTED	SPECIES	Plantae	Tracheophyta	Liliopsida	Alismatales	Alismataceae	Sagittaria	Sagittaria latifolia	Sagittaria latifolia Willd.
1	Salix nigra Marshall	Salix nigra Marshall	5372854	EXACT	100	ACCEPTED	SPECIES	Plantae	Tracheophyta	Magnoliopsida	Malpighiales	Salicaceae	Salix	Salix nigra	Salix nigra Marshall
1	Salvia lyrata L.	Salvia lyrata L.	2927027	EXACT	100	ACCEPTED	SPECIES	Plantae	Tracheophyta	Magnoliopsida	Lamiales	Lamiaceae	Salvia	Salvia lyrata	Salvia lyrata L.
1	Sambucus canadensis L.	Sambucus canadensis L.	6369819	EXACT	100	ACCEPTED	SPECIES	Plantae	Tracheophyta	Magnoliopsida	Dipsacales	Adoxaceae	Sambucus	Sambucus canadensis	Sambucus canadensis L.
1	Sanguinaria canadensis L.	Sanguinaria canadensis L.	5334192	EXACT	100	ACCEPTED	SPECIES	Plantae	Tracheophyta	Magnoliopsida	Ranunculales	Papaveraceae	Sanguinaria	Sanguinaria canadensis	Sanguinaria canadensis L.
1	Sanicula canadensis L.	Sanicula canadensis L.	3034834	EXACT	100	ACCEPTED	SPECIES	Plantae	Tracheophyta	Magnoliopsida	Apiales	Apiaceae	Sanicula	Sanicula canadensis	Sanicula canadensis L.
1	Sanicula marilandica L.	Sanicula marilandica L.	3034845	EXACT	100	ACCEPTED	SPECIES	Plantae	Tracheophyta	Magnoliopsida	Apiales	Apiaceae	Sanicula	Sanicula marilandica	Sanicula marilandica L.
1	Sanicula gregaria E. Bickn.	Sanicula gregaria Bicknell	3034840	EXACT	100	SYNONYM	SPECIES	Plantae	Tracheophyta	Magnoliopsida	Apiales	Apiaceae	Sanicula	Sanicula odorata	Sanicula odorata (Raf.) K.M.Pryer & L.R.Phillippe
1	Sassafras albidum (Nutt.) Nees	Sassafras albidum (Nutt.) Nees	3034002	EXACT	100	ACCEPTED	SPECIES	Plantae	Tracheophyta	Magnoliopsida	Laurales	Lauraceae	Sassafras	Sassafras albidum	Sassafras albidum (Nutt.) Nees
1	Saururus cernuus L.	Saururus cernuus L.	5384932	EXACT	100	ACCEPTED	SPECIES	Plantae	Tracheophyta	Magnoliopsida	Piperales	Saururaceae	Saururus	Saururus cernuus	Saururus cernuus L.
1	Botrychium biternatum (Sav.) Underw.	Botrychium biternatum (Sav.) Underw.	2650191	EXACT	100	SYNONYM	SPECIES	Plantae	Tracheophyta	Polypodiopsida	Ophioglossales	Ophioglossaceae	Sceptridium	Sceptridium biternatum	Sceptridium biternatum Lyon
1	Botrychium dissectum Spreng.	Botrychium dissectum Spreng.	2650153	EXACT	100	SYNONYM	SPECIES	Plantae	Tracheophyta	Polypodiopsida	Ophioglossales	Ophioglossaceae	Sceptridium	Sceptridium dissectum	Sceptridium dissectum Lyon
1	Scirpus cyperinus (L.) Kunth	Scirpus cyperinus Kunth	2720171	EXACT	100	ACCEPTED	SPECIES	Plantae	Tracheophyta	Liliopsida	Poales	Cyperaceae	Scirpus	Scirpus cyperinus	Scirpus cyperinus Kunth
1	Scirpus georgianus Harper	Scirpus georgianus Harper	2720269	EXACT	100	ACCEPTED	SPECIES	Plantae	Tracheophyta	Liliopsida	Poales	Cyperaceae	Scirpus	Scirpus georgianus	Scirpus georgianus Harper
1	Scirpus polyphyllus Vahl	Scirpus polyphyllus Vahl	2720215	EXACT	100	ACCEPTED	SPECIES	Plantae	Tracheophyta	Liliopsida	Poales	Cyperaceae	Scirpus	Scirpus polyphyllus	Scirpus polyphyllus Vahl
1	Scutellaria elliptica Muhlenb.	Scutellaria elliptica Muhl.	7478502	EXACT	100	ACCEPTED	SPECIES	Plantae	Tracheophyta	Magnoliopsida	Lamiales	Lamiaceae	Scutellaria	Scutellaria elliptica	Scutellaria elliptica Muhl.
1	Scutellaria integrifolia L.	Scutellaria integrifolia L.	5341355	EXACT	100	ACCEPTED	SPECIES	Plantae	Tracheophyta	Magnoliopsida	Lamiales	Lamiaceae	Scutellaria	Scutellaria integrifolia	Scutellaria integrifolia L.
1	Sedum sarmentosum Bunge	Sedum sarmentosum Bunge	5362004	EXACT	100	ACCEPTED	SPECIES	Plantae	Tracheophyta	Magnoliopsida	Saxifragales	Crassulaceae	Sedum	Sedum sarmentosum	Sedum sarmentosum Bunge
1	Selaginella apoda (L.) Spring	Selaginella apoda (L.) Spring	2688214	EXACT	100	ACCEPTED	SPECIES	Plantae	Tracheophyta	Lycopodiopsida	Selaginellales	Selaginellaceae	Selaginella	Selaginella apoda	Selaginella apoda (L.) Spring
1	Desmodium marilandicum (L.) DC.	Desmodium marilandicum (L.) DC.	7738889	EXACT	100	SYNONYM	SPECIES	Plantae	Tracheophyta	Magnoliopsida	Fabales	Fabaceae	Senna	Senna marilandica	Senna marilandica Link
1	Cassia obtusifolia L.	Cassia obtusifolia L.	5354123	EXACT	100	SYNONYM	SPECIES	Plantae	Tracheophyta	Magnoliopsida	Fabales	Fabaceae	Senna	Senna obtusifolia	Senna obtusifolia (L.) H.S.Irwin & Barneby
1	Aster paternus Cronquist	Aster paternus (L.) Cronq.	5385830	EXACT	100	SYNONYM	SPECIES	Plantae	Tracheophyta	Magnoliopsida	Asterales	Asteraceae	Sericocarpus	Sericocarpus asteroides	Sericocarpus asteroides Britton, Sterns & Poggenb.
1	Setaria geniculata (Lam.) Beauvois	Setaria geniculata P.Beauv.	7395899	EXACT	100	SYNONYM	SPECIES	Plantae	Tracheophyta	Liliopsida	Poales	Poaceae	Setaria	Setaria parviflora	Setaria parviflora (Poir.) Kergu√©len
1	Sherardia arvensis L.	Sherardia arvensis L.	5339050	EXACT	100	ACCEPTED	SPECIES	Plantae	Tracheophyta	Magnoliopsida	Gentianales	Rubiaceae	Sherardia	Sherardia arvensis	Sherardia arvensis L.
1	Sida rhombifolia L.	Sida rhombifolia L.	5406735	EXACT	100	ACCEPTED	SPECIES	Plantae	Tracheophyta	Magnoliopsida	Malvales	Malvaceae	Sida	Sida rhombifolia	Sida rhombifolia L.
1	Sida spinosa L.	Sida spinosa L.	5406741	EXACT	100	ACCEPTED	SPECIES	Plantae	Tracheophyta	Magnoliopsida	Malvales	Malvaceae	Sida	Sida spinosa	Sida spinosa L.
1	Silene antirrhina L.	Silene antirrhina L.	5384747	EXACT	100	ACCEPTED	SPECIES	Plantae	Tracheophyta	Magnoliopsida	Caryophyllales	Caryophyllaceae	Silene	Silene antirrhina	Silene antirrhina L.
1	Silene stellata (L.) Aiton f.	Silene stellata Ait.	5384756	EXACT	100	ACCEPTED	SPECIES	Plantae	Tracheophyta	Magnoliopsida	Caryophyllales	Caryophyllaceae	Silene	Silene stellata	Silene stellata Ait.
1	Silphium dentatum Elliott	Silphium dentatum Ell.	6063447	EXACT	100	SYNONYM	SPECIES	Plantae	Tracheophyta	Magnoliopsida	Asterales	Asteraceae	Silphium	Silphium asteriscus	Silphium asteriscus L.
1	Silphium compositum Michaux	Silphium compositum Michx.	3092567	EXACT	100	ACCEPTED	SPECIES	Plantae	Tracheophyta	Magnoliopsida	Asterales	Asteraceae	Silphium	Silphium compositum	Silphium compositum Michx.
1	Sisyrinchium angustifolium Miller	Sisyrinchium angustifolium Mill.	5296015	EXACT	100	ACCEPTED	SPECIES	Plantae	Tracheophyta	Liliopsida	Asparagales	Iridaceae	Sisyrinchium	Sisyrinchium angustifolium	Sisyrinchium angustifolium Mill.
1	Sisyrinchium nashii Bickn.	Sisyrinchium nashii E.P.Bicknell	5296074	EXACT	100	ACCEPTED	SPECIES	Plantae	Tracheophyta	Liliopsida	Asparagales	Iridaceae	Sisyrinchium	Sisyrinchium nashii	Sisyrinchium nashii E.P.Bicknell
1	Smilax bona-nox L.	Smilax bona-nox L.	5295574	EXACT	100	ACCEPTED	SPECIES	Plantae	Tracheophyta	Liliopsida	Liliales	Smilacaceae	Smilax	Smilax bona-nox	Smilax bona-nox L.
1	Smilax ecirrhata (Engelm.) Watson	Smilax ecirrhata S.Watson	5295258	EXACT	100	ACCEPTED	SPECIES	Plantae	Tracheophyta	Liliopsida	Liliales	Smilacaceae	Smilax	Smilax ecirrhata	Smilax ecirrhata S.Watson
1	Smilax glauca Walter	Smilax glauca Walter	5295374	EXACT	100	ACCEPTED	SPECIES	Plantae	Tracheophyta	Liliopsida	Liliales	Smilacaceae	Smilax	Smilax glauca	Smilax glauca Walter
1	Smilax hispida Muhl.	Smilax hispida Muhl.	7711121	EXACT	100	DOUBTFUL	SPECIES	Plantae	Tracheophyta	Liliopsida	Liliales	Smilacaceae	Smilax	Smilax hispida	Smilax hispida Muhl. ex Torr.
1	Smilax rotundifolia L.	Smilax rotundifolia L.	5295375	EXACT	100	ACCEPTED	SPECIES	Plantae	Tracheophyta	Liliopsida	Liliales	Smilacaceae	Smilax	Smilax rotundifolia	Smilax rotundifolia L.
1	Smilax walteri Pursh	Smilax walteri Pursh	5295687	EXACT	100	ACCEPTED	SPECIES	Plantae	Tracheophyta	Liliopsida	Liliales	Smilacaceae	Smilax	Smilax walteri	Smilax walteri Pursh
1	Solanum americanum Miller	Solanum L.	2928997	HIGHERRANK	94	ACCEPTED	GENUS	Plantae	Tracheophyta	Magnoliopsida	Solanales	Solanaceae	Solanum	Solanum americanum	Solanum americanum Mill.
1	Solanum carolinense L.	Solanum carolinense L.	2932011	EXACT	100	ACCEPTED	SPECIES	Plantae	Tracheophyta	Magnoliopsida	Solanales	Solanaceae	Solanum	Solanum carolinense	Solanum carolinense L.
1	Solidago canadensis L. var. scabra Torrey & A. Gray	Solidago canadensis var. scabra (Muhl. ex Willd.) Torr. & A.Gray	5705596	EXACT	100	SYNONYM	VARIETY	Plantae	Tracheophyta	Magnoliopsida	Asterales	Asteraceae	Solidago	Solidago altissima	Solidago altissima L.
1	Solidago caesia L.	Solidago caesia L.	5389076	EXACT	100	ACCEPTED	SPECIES	Plantae	Tracheophyta	Magnoliopsida	Asterales	Asteraceae	Solidago	Solidago caesia	Solidago caesia L.
1	Solidago erecta Pursh	Solidago erecta Herb.Banks ex Pursh	5388875	EXACT	100	ACCEPTED	SPECIES	Plantae	Tracheophyta	Magnoliopsida	Asterales	Asteraceae	Solidago	Solidago erecta	Solidago erecta Herb.Banks ex Pursh
1	Solidago leauenworthii Torrey & A. Gray	Solidago leavenworthii Torr. & A.Gray	5389074	FUZZY	98	ACCEPTED	SPECIES	Plantae	Tracheophyta	Magnoliopsida	Asterales	Asteraceae	Solidago	Solidago leavenworthii	Solidago leavenworthii Torr. & A.Gray
1	Solidago nemoralis Aiton var. haleana Fern.	Solidago nemoralis var. haleana Fern.	6291155	EXACT	100	SYNONYM	VARIETY	Plantae	Tracheophyta	Magnoliopsida	Asterales	Asteraceae	Solidago	Solidago nemoralis	Solidago nemoralis Ait.
1	Sonchus asper (L.) Hill	Sonchus asper Hill	3105782	EXACT	100	ACCEPTED	SPECIES	Plantae	Tracheophyta	Magnoliopsida	Asterales	Asteraceae	Sonchus	Sonchus asper	Sonchus asper Hill
1	Sorghastrum elliottii (Mohr) Nash	Sorghastrum elliottii Nash	2704418	EXACT	100	ACCEPTED	SPECIES	Plantae	Tracheophyta	Liliopsida	Poales	Poaceae	Sorghastrum	Sorghastrum elliottii	Sorghastrum elliottii Nash
1	Sorghum halepense Persoon	Sorghum halepense Pers.	2705185	EXACT	100	ACCEPTED	SPECIES	Plantae	Tracheophyta	Liliopsida	Poales	Poaceae	Sorghum	Sorghum halepense	Sorghum halepense Pers.
1	Sparganium americanum Nuttall	Sparganium americanum Nutt.	2702311	EXACT	100	ACCEPTED	SPECIES	Plantae	Tracheophyta	Liliopsida	Poales	Typhaceae	Sparganium	Sparganium americanum	Sparganium americanum Nutt.
1	Spigelia marilandica L.	Spigelia marilandica L.	5414398	EXACT	100	ACCEPTED	SPECIES	Plantae	Tracheophyta	Magnoliopsida	Gentianales	Loganiaceae	Spigelia	Spigelia marilandica	Spigelia marilandica L.
1	Spiranthes praecox (Walter) Watson	Spiranthes praecox (Walter) S.Watson	2805498	EXACT	100	ACCEPTED	SPECIES	Plantae	Tracheophyta	Liliopsida	Asparagales	Orchidaceae	Spiranthes	Spiranthes praecox	Spiranthes praecox (Walter) S.Watson
1	Stellaria media (L.) Cyrillo	Stellaria media (L.) Vill.	5384604	EXACT	88	ACCEPTED	SPECIES	Plantae	Tracheophyta	Magnoliopsida	Caryophyllales	Caryophyllaceae	Stellaria	Stellaria media	Stellaria media (L.) Vill.
1	Stylosanthes biflora (L.) BSP	Stylosanthes biflora (L.) Britton, Sterns & Poggenb.	2975738	EXACT	89	ACCEPTED	SPECIES	Plantae	Tracheophyta	Magnoliopsida	Fabales	Fabaceae	Stylosanthes	Stylosanthes biflora	Stylosanthes biflora (L.) Britton, Sterns & Poggenb.
1	Styrax americana Lam.	Styrax americanus Lam.	5371669	FUZZY	99	ACCEPTED	SPECIES	Plantae	Tracheophyta	Magnoliopsida	Ericales	Styracaceae	Styrax	Styrax americanus	Styrax americanus Lam.
1	Aster dumosus L.	Aster dumosus L.	5406308	EXACT	100	SYNONYM	SPECIES	Plantae	Tracheophyta	Magnoliopsida	Asterales	Asteraceae	Symphyotrichum	Symphyotrichum dumosum	Symphyotrichum dumosum (L.) G.L.Nesom
1	Aster lateriflorus (L.) Britton var. flagellaris Shinners	Aster lateriflorus var. flagellaris Shinners	5693487	EXACT	100	SYNONYM	VARIETY	Plantae	Tracheophyta	Magnoliopsida	Asterales	Asteraceae	Symphyotrichum	Symphyotrichum lateriflorum	Symphyotrichum lateriflorum (L.) √Å.L√∂ve & D.L√∂ve
1	Aster lateriflorus (L.) Britton var. lateriflorus	Aster lateriflorus var. lateriflorus	7174544	EXACT	98	SYNONYM	VARIETY	Plantae	Tracheophyta	Magnoliopsida	Asterales	Asteraceae	Symphyotrichum	Symphyotrichum lateriflorum	Symphyotrichum lateriflorum (L.) √Å.L√∂ve & D.L√∂ve
1	Aster patens Aiton	Aster patens Dryand. ex Ait.	5406504	EXACT	100	SYNONYM	SPECIES	Plantae	Tracheophyta	Magnoliopsida	Asterales	Asteraceae	Symphyotrichum	Symphyotrichum patens	Symphyotrichum patens (Aiton) G.L.Nesom
1	Aster shortii Lindl.	Aster shortii Lindl., 1834	5406357	EXACT	100	SYNONYM	SPECIES	Plantae	Tracheophyta	Magnoliopsida	Asterales	Asteraceae	Symphyotrichum	Symphyotrichum shortii	Symphyotrichum shortii (Lindl.) G.L.Nesom
1	Aster urophyllus Lindley in DC.	Aster urophyllus Lindl.	8008288	EXACT	100	SYNONYM	SPECIES	Plantae	Tracheophyta	Magnoliopsida	Asterales	Asteraceae	Symphyotrichum	Symphyotrichum urophyllum	Symphyotrichum urophyllum (Lindl. ex DC.) G.L.Nesom
1	Taraxacum officinale Wiggers	Taraxacum officinale F.H.Wigg.	5394163	EXACT	100	ACCEPTED	SPECIES	Plantae	Tracheophyta	Magnoliopsida	Asterales	Asteraceae	Taraxacum	Taraxacum officinale	Taraxacum officinale F.H.Wigg.
1	Tephrosia spicata (Walter) Torr. & Gray	Tephrosia spicata Torr. & A.Gray	5342199	EXACT	100	ACCEPTED	SPECIES	Plantae	Tracheophyta	Magnoliopsida	Fabales	Fabaceae	Tephrosia	Tephrosia spicata	Tephrosia spicata Torr. & A.Gray
1	Thalictrum revolutum DC.	Thalictrum revolutum DC.	3033127	EXACT	100	ACCEPTED	SPECIES	Plantae	Tracheophyta	Magnoliopsida	Ranunculales	Ranunculaceae	Thalictrum	Thalictrum revolutum	Thalictrum revolutum DC.
1	Thalictrum thalictroides (L.) J. Boivin	Thalictrum thalictroides (L.) Eames & B.Boivin	3033114	EXACT	100	ACCEPTED	SPECIES	Plantae	Tracheophyta	Magnoliopsida	Ranunculales	Ranunculaceae	Thalictrum	Thalictrum thalictroides	Thalictrum thalictroides (L.) Eames & B.Boivin
1	Tilia americana L.	Tilia americana L.	3152042	EXACT	100	ACCEPTED	SPECIES	Plantae	Tracheophyta	Magnoliopsida	Malvales	Malvaceae	Tilia	Tilia americana	Tilia americana L.
1	Tipularia discolor (Pursh) Nuttall	Tipularia discolor (Pursh) Nutt.	5308378	EXACT	100	ACCEPTED	SPECIES	Plantae	Tracheophyta	Liliopsida	Asparagales	Orchidaceae	Tipularia	Tipularia discolor	Tipularia discolor (Pursh) Nutt.
1	Toxicodendron radicans (L.) Kuntze	Toxicodendron radicans (L.) Kuntze	3190628	EXACT	100	ACCEPTED	SPECIES	Plantae	Tracheophyta	Magnoliopsida	Sapindales	Anacardiaceae	Toxicodendron	Toxicodendron radicans	Toxicodendron radicans (L.) Kuntze
1	Tradescantia hirsuticaulis Small	Tradescantia hirsuticaulis Small	2765306	EXACT	100	ACCEPTED	SPECIES	Plantae	Tracheophyta	Liliopsida	Commelinales	Commelinaceae	Tradescantia	Tradescantia hirsuticaulis	Tradescantia hirsuticaulis Small
1	Tradescantia ohiensis Raf.	Tradescantia ohiensis Raf.	2765175	EXACT	100	ACCEPTED	SPECIES	Plantae	Tracheophyta	Liliopsida	Commelinales	Commelinaceae	Tradescantia	Tradescantia ohiensis	Tradescantia ohiensis Raf.
1	Tradescantia subaspera Ker	Tradescantia subaspera Ker Gawl.	2765298	EXACT	83	ACCEPTED	SPECIES	Plantae	Tracheophyta	Liliopsida	Commelinales	Commelinaceae	Tradescantia	Tradescantia subaspera	Tradescantia subaspera Ker Gawl.
1	Tragia urticifolia Michaux	Tragia urticifolia Michx.	3061642	EXACT	100	ACCEPTED	SPECIES	Plantae	Tracheophyta	Magnoliopsida	Malpighiales	Euphorbiaceae	Tragia	Tragia urticifolia	Tragia urticifolia Michx.
1	Triadenum walteri (Gmelin) Gleason	Triadenum walteri (F.Gmel.) Gleason	3189582	EXACT	100	ACCEPTED	SPECIES	Plantae	Tracheophyta	Magnoliopsida	Malpighiales	Hypericaceae	Triadenum	Triadenum walteri	Triadenum walteri (F.Gmel.) Gleason
1	Tridens flavus (L.) Hitchcock	Tridens flavus Hitchc.	5289648	EXACT	100	ACCEPTED	SPECIES	Plantae	Tracheophyta	Liliopsida	Poales	Poaceae	Tridens	Tridens flavus	Tridens flavus Hitchc.
1	Trifolium arvense L.	Trifolium arvense L.	5359246	EXACT	100	ACCEPTED	SPECIES	Plantae	Tracheophyta	Magnoliopsida	Fabales	Fabaceae	Trifolium	Trifolium arvense	Trifolium arvense L.
1	Trifolium campestre Schreber	Trifolium campestre Schreb.	5359477	EXACT	100	ACCEPTED	SPECIES	Plantae	Tracheophyta	Magnoliopsida	Fabales	Fabaceae	Trifolium	Trifolium campestre	Trifolium campestre Schreb.
1	Trifolium carolinianum Michaux	Trifolium carolinianum Michx.	5359241	EXACT	100	ACCEPTED	SPECIES	Plantae	Tracheophyta	Magnoliopsida	Fabales	Fabaceae	Trifolium	Trifolium carolinianum	Trifolium carolinianum Michx.
1	Trifolium dubium Sibthorp	Trifolium dubium Sibth.	5359429	EXACT	100	ACCEPTED	SPECIES	Plantae	Tracheophyta	Magnoliopsida	Fabales	Fabaceae	Trifolium	Trifolium dubium	Trifolium dubium Sibth.
1	Trifolium pratense L.	Trifolium pratense L.	8324121	EXACT	100	ACCEPTED	SPECIES	Plantae	Tracheophyta	Magnoliopsida	Fabales	Fabaceae	Trifolium	Trifolium pratense	Trifolium pratense L.
1	Trifolium repens L.	Trifolium repens L.	5358748	EXACT	100	ACCEPTED	SPECIES	Plantae	Tracheophyta	Magnoliopsida	Fabales	Fabaceae	Trifolium	Trifolium repens	Trifolium repens L.
1	Trillium catesbaei Elliott	Trillium catesbaei Elliott	2742183	EXACT	100	ACCEPTED	SPECIES	Plantae	Tracheophyta	Liliopsida	Liliales	Melanthiaceae	Trillium	Trillium catesbaei	Trillium catesbaei Elliott
1	Trillium cuneatum Raf.	Trillium cuneatum Raf.	2742247	EXACT	100	ACCEPTED	SPECIES	Plantae	Tracheophyta	Liliopsida	Liliales	Melanthiaceae	Trillium	Trillium cuneatum	Trillium cuneatum Raf.
1	Triodanis perfoliata (L.) Nieuvl.	Triodanis perfoliata Nieuwl.	3167003	EXACT	100	ACCEPTED	SPECIES	Plantae	Tracheophyta	Magnoliopsida	Asterales	Campanulaceae	Triodanis	Triodanis perfoliata	Triodanis perfoliata Nieuwl.
1	Tripsacum dactyloides L.	Tripsacum dactyloides L.	2705536	EXACT	100	ACCEPTED	SPECIES	Plantae	Tracheophyta	Liliopsida	Poales	Poaceae	Tripsacum	Tripsacum dactyloides	Tripsacum dactyloides L.
1	Tsuga canadensis (L.) Carr. (planted)	Tsuga canadensis Carri√®re	2687182	EXACT	100	ACCEPTED	SPECIES	Plantae	Tracheophyta	Pinopsida	Pinales	Pinaceae	Tsuga	Tsuga canadensis	Tsuga canadensis Carri√®re
1	Typha latifolia L.	Typha latifolia L.	5289423	EXACT	100	ACCEPTED	SPECIES	Plantae	Tracheophyta	Liliopsida	Poales	Typhaceae	Typha	Typha latifolia	Typha latifolia L.
1	Ulmus alata Michaux	Ulmus alata Michx.	5361878	EXACT	100	ACCEPTED	SPECIES	Plantae	Tracheophyta	Magnoliopsida	Rosales	Ulmaceae	Ulmus	Ulmus alata	Ulmus alata Michx.
1	Ulmus americana L.	Ulmus americana L.	5361872	EXACT	100	ACCEPTED	SPECIES	Plantae	Tracheophyta	Magnoliopsida	Rosales	Ulmaceae	Ulmus	Ulmus americana	Ulmus americana L.
1	Vaccinium arboreum Marshall	Vaccinium arboreum Marshall	2882828	EXACT	100	ACCEPTED	SPECIES	Plantae	Tracheophyta	Magnoliopsida	Ericales	Ericaceae	Vaccinium	Vaccinium arboreum	Vaccinium arboreum Marshall
1	Vaccinium corybosum L.	Vaccinium corymbosum L.	2882849	FUZZY	98	ACCEPTED	SPECIES	Plantae	Tracheophyta	Magnoliopsida	Ericales	Ericaceae	Vaccinium	Vaccinium corymbosum	Vaccinium corymbosum L.
1	Vaccinium stamineum L.	Vaccinium stamineum L.	2882913	EXACT	100	ACCEPTED	SPECIES	Plantae	Tracheophyta	Magnoliopsida	Ericales	Ericaceae	Vaccinium	Vaccinium stamineum	Vaccinium stamineum L.
1	Valerianella radiata (L.) Dufr.	Valerianella radiata Dufr.	2888782	EXACT	100	ACCEPTED	SPECIES	Plantae	Tracheophyta	Magnoliopsida	Dipsacales	Caprifoliaceae	Valerianella	Valerianella radiata	Valerianella radiata Dufr.
1	Vallisneria americana Michaux	Vallisneria americana Michx.	2865501	EXACT	100	ACCEPTED	SPECIES	Plantae	Tracheophyta	Liliopsida	Alismatales	Hydrocharitaceae	Vallisneria	Vallisneria americana	Vallisneria americana Michx.
1	Verbascum thapsus L.	Verbascum thapsus L.	3171949	EXACT	100	ACCEPTED	SPECIES	Plantae	Tracheophyta	Magnoliopsida	Lamiales	Scrophulariaceae	Verbascum	Verbascum thapsus	Verbascum thapsus L.
1	Verbena brasiliensis Vellozo	Verbena brasiliensis Velloso	2925518	EXACT	100	ACCEPTED	SPECIES	Plantae	Tracheophyta	Magnoliopsida	Lamiales	Verbenaceae	Verbena	Verbena brasiliensis	Verbena brasiliensis Velloso
1	Vernonia noueboracensis (L.) Michaux	Vernonia noveboracensis (L.) Michx.	5397534	FUZZY	97	DOUBTFUL	SPECIES	Plantae	Tracheophyta	Magnoliopsida	Asterales	Asteraceae	Vernonia	Vernonia noveboracensis	Vernonia noveboracensis Willd.
1	Veronica arvensis L.	Veronica arvensis L.	3172048	EXACT	100	ACCEPTED	SPECIES	Plantae	Tracheophyta	Magnoliopsida	Lamiales	Plantaginaceae	Veronica	Veronica arvensis	Veronica arvensis L.
1	Veronica hederaefolia L.	Veronica hederaefolia L.	8894657	EXACT	100	ACCEPTED	SPECIES	Plantae	Tracheophyta	Magnoliopsida	Lamiales	Plantaginaceae	Veronica	Veronica hederaefolia	Veronica hederaefolia L.
1	Viburnum acerifolium L.	Viburnum acerifolium L.	2888596	EXACT	100	ACCEPTED	SPECIES	Plantae	Tracheophyta	Magnoliopsida	Dipsacales	Adoxaceae	Viburnum	Viburnum acerifolium	Viburnum acerifolium L.
1	Viburnum nudum L.	Viburnum nudum L.	2888627	EXACT	100	ACCEPTED	SPECIES	Plantae	Tracheophyta	Magnoliopsida	Dipsacales	Adoxaceae	Viburnum	Viburnum nudum	Viburnum nudum L.
1	Viburnum rufidulum Raf.	Viburnum rufidulum Raf.	2888590	EXACT	100	ACCEPTED	SPECIES	Plantae	Tracheophyta	Magnoliopsida	Dipsacales	Adoxaceae	Viburnum	Viburnum rufidulum	Viburnum rufidulum Raf.
1	Vicia caroliniana Walter	Vicia caroliniana Walter	2975000	EXACT	100	ACCEPTED	SPECIES	Plantae	Tracheophyta	Magnoliopsida	Fabales	Fabaceae	Vicia	Vicia caroliniana	Vicia caroliniana Walter
1	Vicia grandiflora Scopoli	Vicia grandiflora Scop.	2974901	EXACT	100	ACCEPTED	SPECIES	Plantae	Tracheophyta	Magnoliopsida	Fabales	Fabaceae	Vicia	Vicia grandiflora	Vicia grandiflora Scop.
1	Vicia angustifolia Reichard	Vicia angustifolia Reichard	8194575	EXACT	100	SYNONYM	SPECIES	Plantae	Tracheophyta	Magnoliopsida	Fabales	Fabaceae	Vicia	Vicia sativa	Vicia sativa L.
1	Vinca major L.	Vinca major L.	3169708	EXACT	100	ACCEPTED	SPECIES	Plantae	Tracheophyta	Magnoliopsida	Gentianales	Apocynaceae	Vinca	Vinca major	Vinca major L.
1	Viola bicolor Pursh	Viola bicolor Pursh	5331340	EXACT	100	ACCEPTED	SPECIES	Plantae	Tracheophyta	Magnoliopsida	Malpighiales	Violaceae	Viola	Viola bicolor	Viola bicolor Pursh
1	Viola sororia Willd. var. sororia	Viola sororia var. sororia	7226038	EXACT	98	ACCEPTED	VARIETY	Plantae	Tracheophyta	Magnoliopsida	Malpighiales	Violaceae	Viola	Viola sororia	Viola sororia Willd.
1	Viola tripartita Elliott	Viola tripartita Elliott	5331304	EXACT	100	ACCEPTED	SPECIES	Plantae	Tracheophyta	Magnoliopsida	Malpighiales	Violaceae	Viola	Viola tripartita	Viola tripartita Elliott
1	Vitis aestivalis Michaux var. aestivalis	Vitis aestivalis var. aestivalis	6394171	EXACT	98	ACCEPTED	VARIETY	Plantae	Tracheophyta	Magnoliopsida	Vitales	Vitaceae	Vitis	Vitis aestivalis	Vitis aestivalis Michx.
1	Vitis cinerea (Engelm. ex A. Gray) Millardet var. baileyana (Munson) Comeaux	Vitis cinerea var. baileyana (Munson) Comeaux	5658537	EXACT	100	ACCEPTED	VARIETY	Plantae	Tracheophyta	Magnoliopsida	Vitales	Vitaceae	Vitis	Vitis cinerea	Vitis cinerea (Engelm.) Millardet
1	Vitis rotundifolia Michaux	Vitis rotundifolia Michx.	5372394	EXACT	100	ACCEPTED	SPECIES	Plantae	Tracheophyta	Magnoliopsida	Vitales	Vitaceae	Vitis	Vitis rotundifolia	Vitis rotundifolia Michx.
1	Vulpia octoflora (Walter) Rydb.	Vulpia octoflora Rydb.	5289597	EXACT	100	ACCEPTED	SPECIES	Plantae	Tracheophyta	Liliopsida	Poales	Poaceae	Vulpia	Vulpia octoflora	Vulpia octoflora Rydb.
1	Wisteria sinensis (Sims) Sweet	Wisteria sinensis Sweet	2977331	EXACT	100	ACCEPTED	SPECIES	Plantae	Tracheophyta	Magnoliopsida	Fabales	Fabaceae	Wisteria	Wisteria sinensis	Wisteria sinensis Sweet
1	Wolffia brasiliensis Weddell	Wolffia brasiliensis Wedd.	5330080	EXACT	100	ACCEPTED	SPECIES	Plantae	Tracheophyta	Liliopsida	Alismatales	Araceae	Wolffia	Wolffia brasiliensis	Wolffia brasiliensis Wedd.
1	Xanthium strumarium L.	Xanthium strumarium L.	3089154	EXACT	100	ACCEPTED	SPECIES	Plantae	Tracheophyta	Magnoliopsida	Asterales	Asteraceae	Xanthium	Xanthium strumarium	Xanthium strumarium L.
1	Xanthorhiza simplicissima Marshall	Xanthorhiza simplicissima Marshall	3033662	EXACT	100	ACCEPTED	SPECIES	Plantae	Tracheophyta	Magnoliopsida	Ranunculales	Ranunculaceae	Xanthorhiza	Xanthorhiza simplicissima	Xanthorhiza simplicissima Marshall
1	Yucca filamentosa L.	Yucca filamentosa L.	2775561	EXACT	100	ACCEPTED	SPECIES	Plantae	Tracheophyta	Liliopsida	Asparagales	Asparagaceae	Yucca	Yucca filamentosa	Yucca filamentosa L.
2	Acer rubrum L.	Acer rubrum L.	3189883	EXACT	100	ACCEPTED	SPECIES	Plantae	Tracheophyta	Magnoliopsida	Sapindales	Sapindaceae	Acer	Acer rubrum	Acer rubrum L.
2	Acer saccharum Marshall ssp. Leucoderme (Small) Desmarais	Acer saccharum Marshall	3189859	EXACT	100	ACCEPTED	SPECIES	Plantae	Tracheophyta	Magnoliopsida	Sapindales	Sapindaceae	Acer	Acer saccharum	Acer saccharum Marshall
2	Achillea millefolium L.	Achillea millefolium L.	3120060	EXACT	100	ACCEPTED	SPECIES	Plantae	Tracheophyta	Magnoliopsida	Asterales	Asteraceae	Achillea	Achillea millefolium	Achillea millefolium L.
2	Actaea pachypoda EU.	Actaea pachypoda Elliott	5371705	EXACT	83	ACCEPTED	SPECIES	Plantae	Tracheophyta	Magnoliopsida	Ranunculales	Ranunculaceae	Actaea	Actaea pachypoda	Actaea pachypoda Elliott
2	Adiantum pedatum L.	Adiantum pedatum L.	2651832	EXACT	100	ACCEPTED	SPECIES	Plantae	Tracheophyta	Polypodiopsida	Polypodiales	Pteridaceae	Adiantum	Adiantum pedatum	Adiantum pedatum L.
2	Aesculus sylvatica Bartram	Aesculus sylvatica W.Bartram	3189816	EXACT	100	ACCEPTED	SPECIES	Plantae	Tracheophyta	Magnoliopsida	Sapindales	Sapindaceae	Aesculus	Aesculus sylvatica	Aesculus sylvatica W.Bartram
2	Agalinis purpurea (L.) Pennell	Agalinis purpurea Pennell	3171284	EXACT	100	ACCEPTED	SPECIES	Plantae	Tracheophyta	Magnoliopsida	Lamiales	Orobanchaceae	Agalinis	Agalinis purpurea	Agalinis purpurea Pennell
2	Agalinis tenuifolia Raf.	Agalinis tenuifolia Raf.	3171226	EXACT	100	ACCEPTED	SPECIES	Plantae	Tracheophyta	Magnoliopsida	Lamiales	Orobanchaceae	Agalinis	Agalinis tenuifolia	Agalinis tenuifolia Raf.
2	Eupatorium rugosum Houttuyn.	Eupatorium rugosum Houtt.	7654128	EXACT	100	SYNONYM	SPECIES	Plantae	Tracheophyta	Magnoliopsida	Asterales	Asteraceae	Ageratina	Ageratina altissima	Ageratina altissima (L.) R.M.King & H.Rob.
2	Agrimonia gryposepala Waliroth	Agrimonia gryposepala Wallr.	3002117	EXACT	83	ACCEPTED	SPECIES	Plantae	Tracheophyta	Magnoliopsida	Rosales	Rosaceae	Agrimonia	Agrimonia gryposepala	Agrimonia gryposepala Wallr.
2	Agrimonia parviflora Aiton	Agrimonia parviflora Aiton	8236970	EXACT	100	ACCEPTED	SPECIES	Plantae	Tracheophyta	Magnoliopsida	Rosales	Rosaceae	Agrimonia	Agrimonia parviflora	Agrimonia parviflora Aiton
2	Agrostis perennans (Walter) Tuckerman	Agrostis perennans (Walter) Tuck.	2706477	EXACT	100	ACCEPTED	SPECIES	Plantae	Tracheophyta	Liliopsida	Poales	Poaceae	Agrostis	Agrostis perennans	Agrostis perennans (Walter) Tuck.
2	Albizia julibrissin Durazzini	Albizia julibrissin Durazz.	2972983	EXACT	100	ACCEPTED	SPECIES	Plantae	Tracheophyta	Magnoliopsida	Fabales	Fabaceae	Albizia	Albizia julibrissin	Albizia julibrissin Durazz.
2	Aletris farinosa L.	Aletris farinosa L.	2756106	EXACT	100	ACCEPTED	SPECIES	Plantae	Tracheophyta	Liliopsida	Dioscoreales	Nartheciaceae	Aletris	Aletris farinosa	Aletris farinosa L.
2	Allium cernuum Roth ex Roemer	Allium L.	9624496	HIGHERRANK	94	ACCEPTED	GENUS	Plantae	Tracheophyta	Liliopsida	Asparagales	Amaryllidaceae	Allium	Allium cernuum	Allium cernuum Roth
2	Alnus serrulata (Aiton) Wild.	Alnus serrata hort.	9201337	FUZZY	92	SYNONYM	SPECIES	Plantae	Tracheophyta	Magnoliopsida	Fagales	Betulaceae	Alnus	Alnus serrulata	Alnus serrulata Willd.
2	Amaranthus hybridus L.	Amaranthus hybridus L.	5384364	EXACT	100	ACCEPTED	SPECIES	Plantae	Tracheophyta	Magnoliopsida	Caryophyllales	Amaranthaceae	Amaranthus	Amaranthus hybridus	Amaranthus hybridus L.
2	Ambrosia artemisiifolia L.	Ambrosia artemisiifolia L.	8002952	EXACT	100	ACCEPTED	SPECIES	Plantae	Tracheophyta	Magnoliopsida	Asterales	Asteraceae	Ambrosia	Ambrosia artemisiifolia	Ambrosia artemisiifolia L.
2	Amelanchier arborea (Michx. f.) Fernald	Amelanchier arborea (Michx.f.) Fernald	3024052	EXACT	100	ACCEPTED	SPECIES	Plantae	Tracheophyta	Magnoliopsida	Rosales	Rosaceae	Amelanchier	Amelanchier arborea	Amelanchier arborea (Michx.f.) Fernald
2	Amianthium muscaetoxicum (Walter) Gray	Amianthium muscaetoxicum (Walter) A.Gray	3873811	EXACT	100	SYNONYM	SPECIES	Plantae	Tracheophyta	Liliopsida	Liliales	Melanthiaceae	Amianthium	Amianthium muscitoxicum	Amianthium muscitoxicum (Walter) A.Gray
2	Amorpha glabra Poiret	Amorpha glabra (Pers.) Poir.	5357375	EXACT	100	ACCEPTED	SPECIES	Plantae	Tracheophyta	Magnoliopsida	Fabales	Fabaceae	Amorpha	Amorpha glabra	Amorpha glabra (Pers.) Poir.
2	Amsonia tabernaemontana Walter	Amsonia tabernaemontana Walter	3169689	EXACT	100	ACCEPTED	SPECIES	Plantae	Tracheophyta	Magnoliopsida	Gentianales	Apocynaceae	Amsonia	Amsonia tabernaemontana	Amsonia tabernaemontana Walter
2	Anemone lancifolia Pursh.	Anemone lancifolia Pursh	3033230	EXACT	100	ACCEPTED	SPECIES	Plantae	Tracheophyta	Magnoliopsida	Ranunculales	Ranunculaceae	Anemone	Anemone lancifolia	Anemone lancifolia Pursh
2	Anemone virginiana L.	Anemone virginiana L.	3033255	EXACT	100	ACCEPTED	SPECIES	Plantae	Tracheophyta	Magnoliopsida	Ranunculales	Ranunculaceae	Anemone	Anemone virginiana	Anemone virginiana L.
2	Angelica venenosa (Greenway) Fernald	Angelica venenosa (Greenway) Fernald	5371819	EXACT	100	ACCEPTED	SPECIES	Plantae	Tracheophyta	Magnoliopsida	Apiales	Apiaceae	Angelica	Angelica venenosa	Angelica venenosa (Greenway) Fernald
2	Antennaria plantaginifolia (L.) Richardson	Antennaria plantaginifolia (L.) Richardson, 1823	5385473	EXACT	100	DOUBTFUL	SPECIES	Plantae	Tracheophyta	Magnoliopsida	Asterales	Asteraceae	Antennaria	Antennaria plantaginifolia	Antennaria plantaginifolia Hook.
2	Antennaria solitaria Rydberg	Antennaria solitaria Rydb.	5385600	EXACT	100	ACCEPTED	SPECIES	Plantae	Tracheophyta	Magnoliopsida	Asterales	Asteraceae	Antennaria	Antennaria solitaria	Antennaria solitaria Rydb.
2	Anthoxanthum odoratum L.	Anthoxanthum odoratum L.	2705975	EXACT	100	ACCEPTED	SPECIES	Plantae	Tracheophyta	Liliopsida	Poales	Poaceae	Anthoxanthum	Anthoxanthum odoratum	Anthoxanthum odoratum L.
2	Apios americana Walter	Apios americana Medik.	2966796	EXACT	83	ACCEPTED	SPECIES	Plantae	Tracheophyta	Magnoliopsida	Fabales	Fabaceae	Apios	Apios americana	Apios americana Medik.
2	Aralia racemosa L.	Aralia racemosa L.	3036958	EXACT	100	ACCEPTED	SPECIES	Plantae	Tracheophyta	Magnoliopsida	Apiales	Araliaceae	Aralia	Aralia racemosa	Aralia racemosa L.
2	Aralia spinosa L.	Aralia spinosa L.	3036972	EXACT	100	ACCEPTED	SPECIES	Plantae	Tracheophyta	Magnoliopsida	Apiales	Araliaceae	Aralia	Aralia spinosa	Aralia spinosa L.
2	Arisaema triphyllum (L.) Schott	Arisaema triphyllum (L.) Schott	2867316	EXACT	100	ACCEPTED	SPECIES	Plantae	Tracheophyta	Liliopsida	Alismatales	Araceae	Arisaema	Arisaema triphyllum	Arisaema triphyllum (L.) Schott
2	Aristolochia serpentaria L.	Aristolochia serpentaria L.	2873979	EXACT	100	ACCEPTED	SPECIES	Plantae	Tracheophyta	Magnoliopsida	Piperales	Aristolochiaceae	Aristolochia	Aristolochia serpentaria	Aristolochia serpentaria L.
2	Cacalia atriplicifolia L.	Cacalia atriplicifolia L.	5390072	EXACT	100	SYNONYM	SPECIES	Plantae	Tracheophyta	Magnoliopsida	Asterales	Asteraceae	Arnoglossum	Arnoglossum atriplicifolium	Arnoglossum atriplicifolium (L.) H.Rob.
2	Sorbus arbutifolia (L.) Heynhold	Sorbus arbutifolia (L.) Heynh.	2988608	EXACT	100	SYNONYM	SPECIES	Plantae	Tracheophyta	Magnoliopsida	Rosales	Rosaceae	Aronia	Aronia arbutifolia	Aronia arbutifolia (L.) Pers.
2	Anthaxon hispidus var. cryptatherus (Hackel)	Arthraxon hispidus var. cryptatherus (Hack.) Honda	5290204	FUZZY	83	SYNONYM	VARIETY	Plantae	Tracheophyta	Liliopsida	Poales	Poaceae	Arthraxon	Arthraxon hispidus	Arthraxon hispidus (Thunb.) Makino
2	Aruncus dioicus (Walter) Fernald	Aruncus dioicus (Walter) Fernald	5362136	EXACT	100	ACCEPTED	SPECIES	Plantae	Tracheophyta	Magnoliopsida	Rosales	Rosaceae	Aruncus	Aruncus dioicus	Aruncus dioicus (Walter) Fernald
2	Arundinaria gigantea (Walter) Muhl.	Arundinaria gigantea (Walter) Muhl.	2705964	EXACT	100	ACCEPTED	SPECIES	Plantae	Tracheophyta	Liliopsida	Poales	Poaceae	Arundinaria	Arundinaria gigantea	Arundinaria gigantea (Walter) Muhl.
2	Asclepias amplexicaulis Smith	Asclepias amplexicaulis Sm.	3170332	EXACT	100	ACCEPTED	SPECIES	Plantae	Tracheophyta	Magnoliopsida	Gentianales	Apocynaceae	Asclepias	Asclepias amplexicaulis	Asclepias amplexicaulis Sm.
2	Asclepias tuberosa L.	Asclepias tuberosa L.	3170305	EXACT	100	ACCEPTED	SPECIES	Plantae	Tracheophyta	Magnoliopsida	Gentianales	Apocynaceae	Asclepias	Asclepias tuberosa	Asclepias tuberosa L.
2	Asclepias variegata L.	Asclepias variegata L.	3170272	EXACT	100	ACCEPTED	SPECIES	Plantae	Tracheophyta	Magnoliopsida	Gentianales	Apocynaceae	Asclepias	Asclepias variegata	Asclepias variegata L.
2	Asimina parviflora (Michaux) Dunal	Asimina parviflora Dunal	3158051	EXACT	100	ACCEPTED	SPECIES	Plantae	Tracheophyta	Magnoliopsida	Magnoliales	Annonaceae	Asimina	Asimina parviflora	Asimina parviflora Dunal
2	Asimina triloba (L.) Dunal	Asimina triloba Dunal	3158040	EXACT	100	ACCEPTED	SPECIES	Plantae	Tracheophyta	Magnoliopsida	Magnoliales	Annonaceae	Asimina	Asimina triloba	Asimina triloba Dunal
2	Asplenium montanum Willd.	Asplenium montanum Willd.	2650651	EXACT	100	ACCEPTED	SPECIES	Plantae	Tracheophyta	Polypodiopsida	Polypodiales	Aspleniaceae	Asplenium	Asplenium montanum	Asplenium montanum Willd.
2	Asplenium platyneuron (L.) Oakes	Asplenium platyneuron (L.) Oakes	8010341	EXACT	100	SYNONYM	SPECIES	Plantae	Tracheophyta	Polypodiopsida	Polypodiales	Aspleniaceae	Asplenium	Asplenium platyneuron	Asplenium platyneuron (L.) Britton, Sterns & Poggenb.
2	Asplenium rhizophyllum L.	Asplenium rhizophyllum L.	2650633	EXACT	100	ACCEPTED	SPECIES	Plantae	Tracheophyta	Polypodiopsida	Polypodiales	Aspleniaceae	Asplenium	Asplenium rhizophyllum	Asplenium rhizophyllum L.
2	Asplenium trichomanes L.	Asplenium trichomanes L.	8108066	EXACT	100	ACCEPTED	SPECIES	Plantae	Tracheophyta	Polypodiopsida	Polypodiales	Aspleniaceae	Asplenium	Asplenium trichomanes	Asplenium trichomanes L.
2	Athyrium asplenioides (Michx.) A.A. Eaton	Athyrium asplenioides (Michx.) A.A.Eaton	6388610	EXACT	100	SYNONYM	SPECIES	Plantae	Tracheophyta	Polypodiopsida	Polypodiales	Athyriaceae	Athyrium	Athyrium asplenioides	Athyrium asplenioides (Michx.) Desv.
2	Aureolaria virginica (L.) Pennell	Aureolaria virginica Pennell	3170773	EXACT	100	ACCEPTED	SPECIES	Plantae	Tracheophyta	Magnoliopsida	Lamiales	Orobanchaceae	Aureolaria	Aureolaria virginica	Aureolaria virginica Pennell
2	Baptisia alba (L.) Brown	Baptisia alba R.Br.	7629935	EXACT	100	DOUBTFUL	SPECIES	Plantae	Tracheophyta	Magnoliopsida	Fabales	Fabaceae	Baptisia	Baptisia alba	Baptisia alba (L.) Vent.
2	Baptisia tinctoria (L.) R. Brown	Baptisia tinctoria (L.) R.Br.	7943262	EXACT	100	DOUBTFUL	SPECIES	Plantae	Tracheophyta	Magnoliopsida	Fabales	Fabaceae	Baptisia	Baptisia tinctoria	Baptisia tinctoria (L.) Vent.
2	Betula lenta L.	Betula lenta L.	5331709	EXACT	100	ACCEPTED	SPECIES	Plantae	Tracheophyta	Magnoliopsida	Fagales	Betulaceae	Betula	Betula lenta	Betula lenta L.
2	Betula nigra L.	Betula nigra L.	5331532	EXACT	100	ACCEPTED	SPECIES	Plantae	Tracheophyta	Magnoliopsida	Fagales	Betulaceae	Betula	Betula nigra	Betula nigra L.
2	Bidens aristosa (Michx.) Britton	Bidens aristosa Britton	5391901	EXACT	100	ACCEPTED	SPECIES	Plantae	Tracheophyta	Magnoliopsida	Asterales	Asteraceae	Bidens	Bidens aristosa	Bidens aristosa Britton
2	Bidens frondosa L.	Bidens frondosa L.	5392174	EXACT	100	ACCEPTED	SPECIES	Plantae	Tracheophyta	Magnoliopsida	Asterales	Asteraceae	Bidens	Bidens frondosa	Bidens frondosa L.
2	Anisostichus capreolata (L.) Bureau	Anisostichus capreolatus (L.) Bureau	7357681	FUZZY	99	SYNONYM	SPECIES	Plantae	Tracheophyta	Magnoliopsida	Lamiales	Bignoniaceae	Bignonia	Bignonia capreolata	Bignonia capreolata L.
2	Boehmeria cylindrica (L.) Swartz	Boehmeria cylindrica (L.) Sw.	2984345	EXACT	100	ACCEPTED	SPECIES	Plantae	Tracheophyta	Magnoliopsida	Rosales	Urticaceae	Boehmeria	Boehmeria cylindrica	Boehmeria cylindrica (L.) Sw.
2	Botrychium virginianum (L.) Swartz	Botrychium virginianum (L.) Sw.	2650159	EXACT	100	SYNONYM	SPECIES	Plantae	Tracheophyta	Polypodiopsida	Ophioglossales	Ophioglossaceae	Botrypus	Botrypus virginianus	Botrypus virginianus (L.) Michx.
2	Panicum ramosum L.	Panicum ramosum L.	2705877	EXACT	100	SYNONYM	SPECIES	Plantae	Tracheophyta	Liliopsida	Poales	Poaceae	Brachiaria	Brachiaria ramosa	Brachiaria ramosa Stapf
2	Calycanthus floridus var. laevigatus (Willd.)	Calycanthus floridus var. laevigatus (Willd.) Torr. & A.Gray	3915921	EXACT	99	SYNONYM	VARIETY	Plantae	Tracheophyta	Magnoliopsida	Laurales	Calycanthaceae	Calycanthus	Calycanthus floridus	Calycanthus floridus L.
2	Calystegia catesbeiana Pursh ssp. Sericata	Calystegia catesbeiana Pursh	7163257	EXACT	100	ACCEPTED	SPECIES	Plantae	Tracheophyta	Magnoliopsida	Solanales	Convolvulaceae	Calystegia	Calystegia catesbeiana	Calystegia catesbeiana Pursh
2	Campanula divaricata Michx.	Campanula divaricata Michx.	5410780	EXACT	100	ACCEPTED	SPECIES	Plantae	Tracheophyta	Magnoliopsida	Asterales	Campanulaceae	Campanula	Campanula divaricata	Campanula divaricata Michx.
2	Campsis radicans (L.) Seemann	Campsis radicans (L.) Seem.	7613490	EXACT	100	ACCEPTED	SPECIES	Plantae	Tracheophyta	Magnoliopsida	Lamiales	Bignoniaceae	Campsis	Campsis radicans	Campsis radicans (L.) Seem.
2	Cardamine clematitis Shuttlew	Cardamine clematitis Shuttlew.	8615085	EXACT	100	DOUBTFUL	SPECIES	Plantae	Tracheophyta	Magnoliopsida	Brassicales	Brassicaceae	Cardamine	Cardamine clematitis	Cardamine clematitis Shuttlew. ex A.Gray
2	Cardamine concatenata (Michx.) Ahles	Cardamine concatenata (Michx.) O.Schwarz	3046217	EXACT	86	ACCEPTED	SPECIES	Plantae	Tracheophyta	Magnoliopsida	Brassicales	Brassicaceae	Cardamine	Cardamine concatenata	Cardamine concatenata (Michx.) O.Schwarz
2	Carex abscondita Mackenzie	Carex abscondita Mack.	2723821	EXACT	100	ACCEPTED	SPECIES	Plantae	Tracheophyta	Liliopsida	Poales	Cyperaceae	Carex	Carex abscondita	Carex abscondita Mack.
2	Carex artitecta Mack.	Carex artitecta Mack.	2725467	EXACT	100	SYNONYM	SPECIES	Plantae	Tracheophyta	Liliopsida	Poales	Cyperaceae	Carex	Carex albicans	Carex albicans Willd. ex Spreng.
2	Carex austro-caroliniana Bailey	Carex austrocaroliniana L.H.Bailey	2728622	FUZZY	99	ACCEPTED	SPECIES	Plantae	Tracheophyta	Liliopsida	Poales	Cyperaceae	Carex	Carex austrocaroliniana	Carex austrocaroliniana L.H.Bailey
2	Carex blanda Dewey	Carex blanda Dewey	2728993	EXACT	100	ACCEPTED	SPECIES	Plantae	Tracheophyta	Liliopsida	Poales	Cyperaceae	Carex	Carex blanda	Carex blanda Dewey
2	Carex complanata Torrey & Hooker.	Carex complanata Torr. & Hook.	2722980	EXACT	100	ACCEPTED	SPECIES	Plantae	Tracheophyta	Liliopsida	Poales	Cyperaceae	Carex	Carex complanata	Carex complanata Torr. & Hook.
2	Carex crinita Lam.	Carex crinita Lam.	2725898	EXACT	100	ACCEPTED	SPECIES	Plantae	Tracheophyta	Liliopsida	Poales	Cyperaceae	Carex	Carex crinita	Carex crinita Lam.
2	Carex debilis Michx. var. pubera Gray.	Carex debilis var. pubera A.Gray	6311377	EXACT	100	SYNONYM	VARIETY	Plantae	Tracheophyta	Liliopsida	Poales	Cyperaceae	Carex	Carex debilis	Carex debilis Michx.
2	Carex digitalis Willd.	Carex digitalis Willd.	2722156	EXACT	100	ACCEPTED	SPECIES	Plantae	Tracheophyta	Liliopsida	Poales	Cyperaceae	Carex	Carex digitalis	Carex digitalis Willd.
2	Carex gracillima Schweinitz.	Carex gracillima Schwein.	2724492	EXACT	100	ACCEPTED	SPECIES	Plantae	Tracheophyta	Liliopsida	Poales	Cyperaceae	Carex	Carex gracillima	Carex gracillima Schwein.
2	Carex intumescens Rudge.	Carex intumescens Rudge	2727755	EXACT	100	ACCEPTED	SPECIES	Plantae	Tracheophyta	Liliopsida	Poales	Cyperaceae	Carex	Carex intumescens	Carex intumescens Rudge
2	Carex laxiculmis Schweinitz	Carex laxiculmis Schwein.	2726928	EXACT	100	ACCEPTED	SPECIES	Plantae	Tracheophyta	Liliopsida	Poales	Cyperaceae	Carex	Carex laxiculmis	Carex laxiculmis Schwein.
2	Carex laxiflora Lam.	Carex laxiflora Lam.	2724466	EXACT	100	ACCEPTED	SPECIES	Plantae	Tracheophyta	Liliopsida	Poales	Cyperaceae	Carex	Carex laxiflora	Carex laxiflora Lam.
2	Carex leptalea Wahlenberg	Carex leptalea Wahlenb.	2729017	EXACT	100	ACCEPTED	SPECIES	Plantae	Tracheophyta	Liliopsida	Poales	Cyperaceae	Carex	Carex leptalea	Carex leptalea Wahlenb.
2	Carex longii Mack	Carex longii Mackenzie	2729850	EXACT	100	ACCEPTED	SPECIES	Plantae	Tracheophyta	Liliopsida	Poales	Cyperaceae	Carex	Carex longii	Carex longii Mackenzie
2	Carex lupulina Muhl. ex Schkuhr.	Carex lupulina Muhl. ex Schkuhr	7368071	EXACT	100	DOUBTFUL	SPECIES	Plantae	Tracheophyta	Liliopsida	Poales	Cyperaceae	Carex	Carex lupulina	Carex lupulina Muhl. ex Willd.
2	Carex lurida Wahlenberg	Carex lurida Wahlenb.	2722529	EXACT	100	ACCEPTED	SPECIES	Plantae	Tracheophyta	Liliopsida	Poales	Cyperaceae	Carex	Carex lurida	Carex lurida Wahlenb.
2	Carex pedunculata Muhl.	Carex pedunculata Muhl.	8588780	EXACT	100	SYNONYM	SPECIES	Plantae	Tracheophyta	Liliopsida	Poales	Cyperaceae	Carex	Carex pedunculata	Carex pedunculata Muhl. ex Willd.
2	Carex plantaginea Lam.	Carex plantaginea Lam.	2723909	EXACT	100	ACCEPTED	SPECIES	Plantae	Tracheophyta	Liliopsida	Poales	Cyperaceae	Carex	Carex plantaginea	Carex plantaginea Lam.
2	Carex retroflexa Muhl. ex Schkuhr.	Carex retroflexa Muhl. ex Schkuhr	7705692	EXACT	100	DOUBTFUL	SPECIES	Plantae	Tracheophyta	Liliopsida	Poales	Cyperaceae	Carex	Carex retroflexa	Carex retroflexa Muhl. ex Willd.
2	Carex striatula Michx.	Carex striatula Michx.	2722475	EXACT	100	ACCEPTED	SPECIES	Plantae	Tracheophyta	Liliopsida	Poales	Cyperaceae	Carex	Carex striatula	Carex striatula Michx.
2	Carex styloflexa Buckley	Carex styloflexa Buckley	2729172	EXACT	100	ACCEPTED	SPECIES	Plantae	Tracheophyta	Liliopsida	Poales	Cyperaceae	Carex	Carex styloflexa	Carex styloflexa Buckley
2	Carex torta Boot.	Carex torta Boott	7847460	EXACT	100	DOUBTFUL	SPECIES	Plantae	Tracheophyta	Liliopsida	Poales	Cyperaceae	Carex	Carex torta	Carex torta Boott ex Tuckerm.
2	Carex vulpinoidea Michx.	Carex vulpinoidea Michx.	2728060	EXACT	100	ACCEPTED	SPECIES	Plantae	Tracheophyta	Liliopsida	Poales	Cyperaceae	Carex	Carex vulpinoidea	Carex vulpinoidea Michx.
2	Carex willdenowii Schkuhr.	Carex willdenowii Schkuhr	8067576	EXACT	100	DOUBTFUL	SPECIES	Plantae	Tracheophyta	Liliopsida	Poales	Cyperaceae	Carex	Carex willdenowii	Carex willdenowii Willd.
2	Carpinus caroliniana Walter	Carpinus caroliniana Walter	2875842	EXACT	100	ACCEPTED	SPECIES	Plantae	Tracheophyta	Magnoliopsida	Fagales	Betulaceae	Carpinus	Carpinus caroliniana	Carpinus caroliniana Walter
2	Carya tomentosa (Poiret) Nuttall	Carya tomentosa (Lam.) Nutt.	3054304	EXACT	99	SYNONYM	SPECIES	Plantae	Tracheophyta	Magnoliopsida	Fagales	Juglandaceae	Carya	Carya alba	Carya alba (L.) Nutt.
2	Carya glabra (Miller) Sweet	Carya glabra (Mill.) Sweet	3054325	EXACT	100	ACCEPTED	SPECIES	Plantae	Tracheophyta	Magnoliopsida	Fagales	Juglandaceae	Carya	Carya glabra	Carya glabra (Mill.) Sweet
2	Castanea dentata (Marshall) Borkh.	Castanea dentata Borkh.	5333230	EXACT	100	ACCEPTED	SPECIES	Plantae	Tracheophyta	Magnoliopsida	Fagales	Fagaceae	Castanea	Castanea dentata	Castanea dentata Borkh.
2	Castanea pumila (L.) Miller	Castanea pumila (L.) Mill.	5333212	EXACT	100	ACCEPTED	SPECIES	Plantae	Tracheophyta	Magnoliopsida	Fagales	Fagaceae	Castanea	Castanea pumila	Castanea pumila (L.) Mill.
2	Catalpa speciosa Warder ex Engelm.	Catalpa speciosa Warder ex Engelm.	3172612	EXACT	100	ACCEPTED	SPECIES	Plantae	Tracheophyta	Magnoliopsida	Lamiales	Bignoniaceae	Catalpa	Catalpa speciosa	Catalpa speciosa Warder ex Engelm.
2	Caulophyllum thalictroides (L.) Michx.	Caulophyllum thalictroides (L.) Michx.	3033920	EXACT	100	ACCEPTED	SPECIES	Plantae	Tracheophyta	Magnoliopsida	Ranunculales	Berberidaceae	Caulophyllum	Caulophyllum thalictroides	Caulophyllum thalictroides (L.) Michx.
2	Ceanothus americanus L.	Ceanothus americanus L.	3039318	EXACT	100	ACCEPTED	SPECIES	Plantae	Tracheophyta	Magnoliopsida	Rosales	Rhamnaceae	Ceanothus	Ceanothus americanus	Ceanothus americanus L.
2	Celtis laevigata Willd.	Celtis laevigata Willd.	2984491	EXACT	100	ACCEPTED	SPECIES	Plantae	Tracheophyta	Magnoliopsida	Rosales	Cannabaceae	Celtis	Celtis laevigata	Celtis laevigata Willd.
2	Celtis occidentalis var. georgiana (Small)	Celtis occidentalis var. georgiana (Small) H.E.Ahles	2984490	EXACT	99	SYNONYM	VARIETY	Plantae	Tracheophyta	Magnoliopsida	Rosales	Cannabaceae	Celtis	Celtis tenuifolia	Celtis tenuifolia Nutt.
2	Centrosema virginianum (L.) Bentham	Centrosema virginianum (L.) Benth.	2964906	EXACT	100	ACCEPTED	SPECIES	Plantae	Tracheophyta	Magnoliopsida	Fabales	Fabaceae	Centrosema	Centrosema virginianum	Centrosema virginianum (L.) Benth.
2	Cephalanthus occidentalis L.	Cephalanthus occidentalis L.	2923947	EXACT	100	ACCEPTED	SPECIES	Plantae	Tracheophyta	Magnoliopsida	Gentianales	Rubiaceae	Cephalanthus	Cephalanthus occidentalis	Cephalanthus occidentalis L.
2	Cercis canadensis L.	Cercis canadensis L.	5353583	EXACT	100	ACCEPTED	SPECIES	Plantae	Tracheophyta	Magnoliopsida	Fabales	Fabaceae	Cercis	Cercis canadensis	Cercis canadensis L.
2	Cassia fasciculata Michx.	Cassia fasciculata Michx.	5351287	EXACT	100	SYNONYM	SPECIES	Plantae	Tracheophyta	Magnoliopsida	Fabales	Fabaceae	Chamaecrista	Chamaecrista fasciculata	Chamaecrista fasciculata (Michx.) Greene
2	Cassia nictitans L.	Cassia nictitans L.	8206052	EXACT	100	SYNONYM	SPECIES	Plantae	Tracheophyta	Magnoliopsida	Fabales	Fabaceae	Chamaecrista	Chamaecrista nictitans	Chamaecrista nictitans Moench
2	Chamaelirium luteum (L.) Gray	Chamaelirium luteum A.Gray	2741647	EXACT	100	ACCEPTED	SPECIES	Plantae	Tracheophyta	Liliopsida	Liliales	Melanthiaceae	Chamaelirium	Chamaelirium luteum	Chamaelirium luteum A.Gray
2	Uniola latifolia Michx.	Uniola latifolia Michx.	2703078	EXACT	100	SYNONYM	SPECIES	Plantae	Tracheophyta	Liliopsida	Poales	Poaceae	Chasmanthium	Chasmanthium latifolium	Chasmanthium latifolium (Michx.) H.O.Yates
2	Uniola sessiliflora Poiret.	Uniola sessiliflora Poir.	2703082	EXACT	100	SYNONYM	SPECIES	Plantae	Tracheophyta	Liliopsida	Poales	Poaceae	Chasmanthium	Chasmanthium laxum	Chasmanthium laxum (L.) H.O.Yates
2	Chelone glabra L.	Chelone glabra L.	5414935	EXACT	100	ACCEPTED	SPECIES	Plantae	Tracheophyta	Magnoliopsida	Lamiales	Plantaginaceae	Chelone	Chelone glabra	Chelone glabra L.
2	Chimaphila maculata (L.) Pursh	Chimaphila maculata Pursh	2888304	EXACT	100	ACCEPTED	SPECIES	Plantae	Tracheophyta	Magnoliopsida	Ericales	Ericaceae	Chimaphila	Chimaphila maculata	Chimaphila maculata Pursh
2	Chionanthus virginicus L.	Chionanthus virginicus L.	3172303	EXACT	100	ACCEPTED	SPECIES	Plantae	Tracheophyta	Magnoliopsida	Lamiales	Oleaceae	Chionanthus	Chionanthus virginicus	Chionanthus virginicus L.
2	Heterotheca mariana (L.) Shinners	Heterotheca mariana (L.) Shinners	5385924	EXACT	100	SYNONYM	SPECIES	Plantae	Tracheophyta	Magnoliopsida	Asterales	Asteraceae	Chrysopsis	Chrysopsis mariana	Chrysopsis mariana (L.) Elliott
2	Cichorium intybus L.	Cichorium intybus L.	5392252	EXACT	100	ACCEPTED	SPECIES	Plantae	Tracheophyta	Magnoliopsida	Asterales	Asteraceae	Cichorium	Cichorium intybus	Cichorium intybus L.
2	Cicuta maculata L.	Cicuta maculata L.	5371867	EXACT	100	ACCEPTED	SPECIES	Plantae	Tracheophyta	Magnoliopsida	Apiales	Apiaceae	Cicuta	Cicuta maculata	Cicuta maculata L.
2	Circaea lutetiana (L.) A. & M. ssp. canadensis	Circaea lutetiana subsp. canadensis (L.) Asch. & Magnus	3665362	EXACT	98	SYNONYM	SUBSPECIES	Plantae	Tracheophyta	Magnoliopsida	Myrtales	Onagraceae	Circaea	Circaea canadensis	Circaea canadensis (L.) Hill
2	Carduus altissimus L.	Carduus altissimus L.	3113557	EXACT	100	SYNONYM	SPECIES	Plantae	Tracheophyta	Magnoliopsida	Asterales	Asteraceae	Cirsium	Cirsium altissimum	Cirsium altissimum (L.) Spreng.
2	Cleistes divaricata (L.) Ames	Cleistes divaricata (L.) Ames	2785917	EXACT	100	SYNONYM	SPECIES	Plantae	Tracheophyta	Liliopsida	Asparagales	Orchidaceae	Cleistesiopsis	Cleistesiopsis divaricata	Cleistesiopsis divaricata (L.) Pansarin & F.Barros
2	Clethra acuminata Michx.	Clethra acuminata Michx.	2888322	EXACT	100	ACCEPTED	SPECIES	Plantae	Tracheophyta	Magnoliopsida	Ericales	Clethraceae	Clethra	Clethra acuminata	Clethra acuminata Michx.
2	Clitoria mariana L.	Clitoria mariana L.	2946542	EXACT	100	ACCEPTED	SPECIES	Plantae	Tracheophyta	Magnoliopsida	Fabales	Fabaceae	Clitoria	Clitoria mariana	Clitoria mariana L.
2	Panicum anceps Michx.	Panicum anceps Michx.	2705070	EXACT	100	SYNONYM	SPECIES	Plantae	Tracheophyta	Liliopsida	Poales	Poaceae	Coleataenia	Coleataenia anceps	Coleataenia anceps (Michx.) Soreng
2	Collinsonia canadensis L.	Collinsonia canadensis L.	2926628	EXACT	100	ACCEPTED	SPECIES	Plantae	Tracheophyta	Magnoliopsida	Lamiales	Lamiaceae	Collinsonia	Collinsonia canadensis	Collinsonia canadensis L.
2	Collinsonia verticillata Baldwin ex Ell.	Collinsonia verticillata Baldw. ex Elliott	8045566	EXACT	100	ACCEPTED	SPECIES	Plantae	Tracheophyta	Magnoliopsida	Lamiales	Lamiaceae	Collinsonia	Collinsonia verticillata	Collinsonia verticillata Baldw. ex Elliott
2	Commelina communis L	Commelina communis L.	2764179	EXACT	100	ACCEPTED	SPECIES	Plantae	Tracheophyta	Liliopsida	Commelinales	Commelinaceae	Commelina	Commelina communis	Commelina communis L.
2	Corallorhiza odontorhiza (Willd.) Nuttall	Corallorhiza odontorhiza Nutt.	2797260	EXACT	100	ACCEPTED	SPECIES	Plantae	Tracheophyta	Liliopsida	Asparagales	Orchidaceae	Corallorhiza	Corallorhiza odontorhiza	Corallorhiza odontorhiza Nutt.
2	Coreopsis auriculata L.	Coreopsis auriculata L.	3133965	EXACT	100	ACCEPTED	SPECIES	Plantae	Tracheophyta	Magnoliopsida	Asterales	Asteraceae	Coreopsis	Coreopsis auriculata	Coreopsis auriculata L.
2	Coreopsis major Walter var. stellata (Nuttall)	Coreopsis major var. stellata (Nutt.) B.L.Rob.	4206928	EXACT	99	SYNONYM	VARIETY	Plantae	Tracheophyta	Magnoliopsida	Asterales	Asteraceae	Coreopsis	Coreopsis major	Coreopsis major Walter
2	Cornus amomum Miller	Cornus amomum Mill.	3082227	EXACT	100	ACCEPTED	SPECIES	Plantae	Tracheophyta	Magnoliopsida	Cornales	Cornaceae	Cornus	Cornus amomum	Cornus amomum Mill.
2	Cornus florida L.	Cornus florida L.	3082240	EXACT	100	ACCEPTED	SPECIES	Plantae	Tracheophyta	Magnoliopsida	Cornales	Cornaceae	Cornus	Cornus florida	Cornus florida L.
2	Corylus americana Walter	Corylus americana Walter	2876060	EXACT	100	ACCEPTED	SPECIES	Plantae	Tracheophyta	Magnoliopsida	Fagales	Betulaceae	Corylus	Corylus americana	Corylus americana Walter
2	Crataegus uniflora Muenchh	Crataegus uniflora M√ºnchh.	3015389	EXACT	100	ACCEPTED	SPECIES	Plantae	Tracheophyta	Magnoliopsida	Rosales	Rosaceae	Crataegus	Crataegus uniflora	Crataegus uniflora M√ºnchh.
2	Crataegus viridis L.	Crataegus viridis L.	3014089	EXACT	100	ACCEPTED	SPECIES	Plantae	Tracheophyta	Magnoliopsida	Rosales	Rosaceae	Crataegus	Crataegus viridis	Crataegus viridis L.
2	Aster cordifolius L.	Aster cordifolius L.	5406305	EXACT	100	SYNONYM	SPECIES	Plantae	Tracheophyta	Magnoliopsida	Asterales	Asteraceae	Croptilon	Croptilon divaricatum	Croptilon divaricatum (Nutt.) Raf.
2	Aster divaricatus L.	Aster divaricatus L.	7659971	EXACT	100	SYNONYM	SPECIES	Plantae	Tracheophyta	Magnoliopsida	Asterales	Asteraceae	Croptilon	Croptilon divaricatum	Croptilon divaricatum (Nutt.) Raf.
2	Croton glandulosus L. var. septentrionalis	Croton glandulosus var. septentrionalis M√ºll.Arg.	8032516	EXACT	98	ACCEPTED	VARIETY	Plantae	Tracheophyta	Magnoliopsida	Malpighiales	Euphorbiaceae	Croton	Croton glandulosus	Croton glandulosus L.
2	Cuscuta compacta Jussieu	Cuscuta compacta Juss.	7363321	EXACT	100	DOUBTFUL	SPECIES	Plantae	Tracheophyta	Magnoliopsida	Solanales	Convolvulaceae	Cuscuta	Cuscuta compacta	Cuscuta compacta Juss. ex Choisy
2	Cyperus strigosus L.	Cyperus strigosus L.	2716719	EXACT	100	ACCEPTED	SPECIES	Plantae	Tracheophyta	Liliopsida	Poales	Cyperaceae	Cyperus	Cyperus strigosus	Cyperus strigosus L.
2	Cypripedium acaule Aiton	Cypripedium acaule Ait.	2820380	EXACT	100	ACCEPTED	SPECIES	Plantae	Tracheophyta	Liliopsida	Asparagales	Orchidaceae	Cypripedium	Cypripedium acaule	Cypripedium acaule Ait.
2	Cypripedium calceolus var. pubescens (Willd.)	Cypripedium calceolus var. pubescens (Willd.) Correll	2820495	EXACT	99	SYNONYM	VARIETY	Plantae	Tracheophyta	Liliopsida	Asparagales	Orchidaceae	Cypripedium	Cypripedium parviflorum	Cypripedium parviflorum Salisb.
2	Dactylis glomerata L.	Dactylis glomerata L.	2705308	EXACT	100	ACCEPTED	SPECIES	Plantae	Tracheophyta	Liliopsida	Poales	Poaceae	Dactylis	Dactylis glomerata	Dactylis glomerata L.
2	Danthonia compressa Austin	Danthonia compressa Austin	2703259	EXACT	100	ACCEPTED	SPECIES	Plantae	Tracheophyta	Liliopsida	Poales	Poaceae	Danthonia	Danthonia compressa	Danthonia compressa Austin
2	Danthonia sericea var. sericea Nuttall	Danthonia sericea var. sericea	6068914	EXACT	98	SYNONYM	VARIETY	Plantae	Tracheophyta	Liliopsida	Poales	Poaceae	Danthonia	Danthonia sericea	Danthonia sericea Nutt.
2	Daucus carota L.	Daucus carota L.	3034742	EXACT	100	ACCEPTED	SPECIES	Plantae	Tracheophyta	Magnoliopsida	Apiales	Apiaceae	Daucus	Daucus carota	Daucus carota L.
2	Lycopodium obscurum L.	Lycopodium obscurum L.	2688403	EXACT	100	SYNONYM	SPECIES	Plantae	Tracheophyta	Lycopodiopsida	Lycopodiales	Lycopodiaceae	Dendrolycopodium	Dendrolycopodium obscurum	Dendrolycopodium obscurum (L.) A.Haines
2	Dennstaedtia punctilobula (Michx.) Moore	Dennstaedtia punctilobula (Michx.) T.Moore	2650777	EXACT	100	ACCEPTED	SPECIES	Plantae	Tracheophyta	Polypodiopsida	Polypodiales	Dennstaedtiaceae	Dennstaedtia	Dennstaedtia punctilobula	Dennstaedtia punctilobula (Michx.) T.Moore
2	Athyrium thelypterioides (Michaux) Desvaux	Athyrium thelypterioides (Michx.) Desv.	5275060	EXACT	100	SYNONYM	SPECIES	Plantae	Tracheophyta	Polypodiopsida	Polypodiales	Athyriaceae	Deparia	Deparia acrostichoides	Deparia acrostichoides (Sw.) M.Kato
2	Desmodium glabellum (Michx.) DC.	Desmodium glabellum DC.	2967151	EXACT	100	ACCEPTED	SPECIES	Plantae	Tracheophyta	Magnoliopsida	Fabales	Fabaceae	Desmodium	Desmodium glabellum	Desmodium glabellum DC.
2	Desmodium glutinosum (Muhl. ex. Willd.)	Desmodium glutinosum (Muhl. ex Willd.) A.Wood	2967416	EXACT	98	ACCEPTED	SPECIES	Plantae	Tracheophyta	Magnoliopsida	Fabales	Fabaceae	Desmodium	Desmodium glutinosum	Desmodium glutinosum (Muhl. ex Willd.) A.Wood
2	Desmodium nudiflorum (L.) DC.	Desmodium nudiflorum (L.) DC.	2967613	EXACT	100	ACCEPTED	SPECIES	Plantae	Tracheophyta	Magnoliopsida	Fabales	Fabaceae	Desmodium	Desmodium nudiflorum	Desmodium nudiflorum (L.) DC.
2	Desmodium paniculatum (L.) DC.	Desmodium paniculatum DC.	2967543	EXACT	100	ACCEPTED	SPECIES	Plantae	Tracheophyta	Magnoliopsida	Fabales	Fabaceae	Desmodium	Desmodium paniculatum	Desmodium paniculatum DC.
2	Desmodium perplexum Schubert.	Desmodium perplexum B.G.Schub.	2967495	EXACT	100	ACCEPTED	SPECIES	Plantae	Tracheophyta	Magnoliopsida	Fabales	Fabaceae	Desmodium	Desmodium perplexum	Desmodium perplexum B.G.Schub.
2	Desmodium rotundifolium DC.	Desmodium rotundifolium DC.	2952124	EXACT	100	ACCEPTED	SPECIES	Plantae	Tracheophyta	Magnoliopsida	Fabales	Fabaceae	Desmodium	Desmodium rotundifolium	Desmodium rotundifolium DC.
2	Dianthus armeria L.	Dianthus armeria L.	3085413	EXACT	100	ACCEPTED	SPECIES	Plantae	Tracheophyta	Magnoliopsida	Caryophyllales	Caryophyllaceae	Dianthus	Dianthus armeria	Dianthus armeria L.
2	Trichomanes petesii Gray	Trichomanes petersii A.Gray	5275179	FUZZY	97	SYNONYM	SPECIES	Plantae	Tracheophyta	Polypodiopsida	Hymenophyllales	Hymenophyllaceae	Didymoglossum	Didymoglossum petersii	Didymoglossum petersii (A.Gray) Copel.
2	Digitaria sanguinalis (L.) Scopoli	Digitaria sanguinalis (L.) Scop.	5289972	EXACT	100	ACCEPTED	SPECIES	Plantae	Tracheophyta	Liliopsida	Poales	Poaceae	Digitaria	Digitaria sanguinalis	Digitaria sanguinalis (L.) Scop.
2	Diodia virginiana L.	Diodia virginiana L.	2908579	EXACT	100	ACCEPTED	SPECIES	Plantae	Tracheophyta	Magnoliopsida	Gentianales	Rubiaceae	Diodia	Diodia virginiana	Diodia virginiana L.
2	Dioscorea villosa L.	Dioscorea villosa L.	2754553	EXACT	100	ACCEPTED	SPECIES	Plantae	Tracheophyta	Liliopsida	Dioscoreales	Dioscoreaceae	Dioscorea	Dioscorea villosa	Dioscorea villosa L.
2	Diospyros virginiana L.	Diospyros virginiana L.	3032986	EXACT	100	ACCEPTED	SPECIES	Plantae	Tracheophyta	Magnoliopsida	Ericales	Ebenaceae	Diospyros	Diospyros virginiana	Diospyros virginiana L.
2	Dryopteris marginalis (L.) Gray	Dryopteris marginalis (L.) A.Gray	5275091	EXACT	100	ACCEPTED	SPECIES	Plantae	Tracheophyta	Polypodiopsida	Polypodiales	Dryopteridaceae	Dryopteris	Dryopteris marginalis	Dryopteris marginalis (L.) A.Gray
2	Echinacea laevigata (Boynton & Beadle)	Echinacea laevigata S.F.Blake	3150927	EXACT	98	ACCEPTED	SPECIES	Plantae	Tracheophyta	Magnoliopsida	Asterales	Asteraceae	Echinacea	Echinacea laevigata	Echinacea laevigata S.F.Blake
2	Echinochloa crus-galli (L.) Beauvois	Echinochloa crus-galli (L.) P.Beauv.	2702808	EXACT	100	ACCEPTED	SPECIES	Plantae	Tracheophyta	Liliopsida	Poales	Poaceae	Echinochloa	Echinochloa crus-galli	Echinochloa crus-galli (L.) P.Beauv.
2	Eleocharis obtusa (Willd.) Schultes	Eleocharis obtusa (Willd.) Schult.	2717467	EXACT	100	ACCEPTED	SPECIES	Plantae	Tracheophyta	Liliopsida	Poales	Cyperaceae	Eleocharis	Eleocharis obtusa	Eleocharis obtusa (Willd.) Schult.
2	Elephantopus carolinianus Willd.	Elephantopus carolinianus Willd.	7434217	EXACT	100	SYNONYM	SPECIES	Plantae	Tracheophyta	Magnoliopsida	Asterales	Asteraceae	Elephantopus	Elephantopus carolinianus	Elephantopus carolinianus Raeusch.
2	Elephantopus tomentosus L.	Elephantopus tomentosus L.	5395934	EXACT	100	ACCEPTED	SPECIES	Plantae	Tracheophyta	Magnoliopsida	Asterales	Asteraceae	Elephantopus	Elephantopus tomentosus	Elephantopus tomentosus L.
2	Eleusine indica (L.) Gaertner	Eleusine indica (L.) Gaertn.	2705953	EXACT	100	ACCEPTED	SPECIES	Plantae	Tracheophyta	Liliopsida	Poales	Poaceae	Eleusine	Eleusine indica	Eleusine indica (L.) Gaertn.
2	Elymus virginicus L.	Elymus virginicus L.	5290318	EXACT	100	ACCEPTED	SPECIES	Plantae	Tracheophyta	Liliopsida	Poales	Poaceae	Elymus	Elymus virginicus	Elymus virginicus L.
2	Epifagus virginiana (L.) Barton	Epifagus virginiana (L.) W.P.C.Barton	3173317	EXACT	100	ACCEPTED	SPECIES	Plantae	Tracheophyta	Magnoliopsida	Lamiales	Orobanchaceae	Epifagus	Epifagus virginiana	Epifagus virginiana (L.) W.P.C.Barton
2	Epigaea repens L.	Epigaea repens L.	2882805	EXACT	100	ACCEPTED	SPECIES	Plantae	Tracheophyta	Magnoliopsida	Ericales	Ericaceae	Epigaea	Epigaea repens	Epigaea repens L.
2	Equisetum arvense L.	Equisetum arvense L.	7924597	EXACT	100	ACCEPTED	SPECIES	Plantae	Tracheophyta	Polypodiopsida	Equisetales	Equisetaceae	Equisetum	Equisetum arvense	Equisetum arvense L.
2	Eragrostis capillaris (L.) Nees	Eragrostis capillaris Nees	7976546	EXACT	100	ACCEPTED	SPECIES	Plantae	Tracheophyta	Liliopsida	Poales	Poaceae	Eragrostis	Eragrostis capillaris	Eragrostis capillaris Nees
2	Eragrostis pilosa (L.) Beauvois	Eragrostis pilosa P.Beauv.	2705400	EXACT	100	ACCEPTED	SPECIES	Plantae	Tracheophyta	Liliopsida	Poales	Poaceae	Eragrostis	Eragrostis pilosa	Eragrostis pilosa P.Beauv.
2	Erigeron annuus (L.) Persoon	Erigeron annuus Pers.	3117449	EXACT	100	ACCEPTED	SPECIES	Plantae	Tracheophyta	Magnoliopsida	Asterales	Asteraceae	Erigeron	Erigeron annuus	Erigeron annuus Pers.
2	Erigeron canadensis L.	Erigeron canadensis L.	3146791	EXACT	100	ACCEPTED	SPECIES	Plantae	Tracheophyta	Magnoliopsida	Asterales	Asteraceae	Erigeron	Erigeron canadensis	Erigeron canadensis L.
2	Erigeron pulchellus Michx.	Erigeron pulchellus Michx.	7820446	EXACT	100	ACCEPTED	SPECIES	Plantae	Tracheophyta	Magnoliopsida	Asterales	Asteraceae	Erigeron	Erigeron pulchellus	Erigeron pulchellus Michx.
2	Eryngium yuccifolium Michx.	Eryngium yuccifolium Michx.	3034408	EXACT	100	ACCEPTED	SPECIES	Plantae	Tracheophyta	Magnoliopsida	Apiales	Apiaceae	Eryngium	Eryngium yuccifolium	Eryngium yuccifolium Michx.
2	Erythronium americanum Ker.	Erythronium americanum Ker Gawl.	2752815	EXACT	83	ACCEPTED	SPECIES	Plantae	Tracheophyta	Liliopsida	Liliales	Liliaceae	Erythronium	Erythronium americanum	Erythronium americanum Ker Gawl.
2	Euonymus americanus L.	Euonymus americanus L.	3169130	EXACT	100	ACCEPTED	SPECIES	Plantae	Tracheophyta	Magnoliopsida	Celastrales	Celastraceae	Euonymus	Euonymus americanus	Euonymus americanus L.
2	Eupatorium album L.	Eupatorium album L.	7393636	EXACT	100	ACCEPTED	SPECIES	Plantae	Tracheophyta	Magnoliopsida	Asterales	Asteraceae	Eupatorium	Eupatorium album	Eupatorium album L.
2	Eupatorium capillifolium (Lam.) Small	Eupatorium capillifolium Small.	5403126	EXACT	100	ACCEPTED	SPECIES	Plantae	Tracheophyta	Magnoliopsida	Asterales	Asteraceae	Eupatorium	Eupatorium capillifolium	Eupatorium capillifolium Small.
2	Eupatorium hyssopifolium L.	Eupatorium hyssopifolium L.	5403057	EXACT	100	ACCEPTED	SPECIES	Plantae	Tracheophyta	Magnoliopsida	Asterales	Asteraceae	Eupatorium	Eupatorium hyssopifolium	Eupatorium hyssopifolium L.
2	Eupatorium perfoliatum L., Boneset.	Eupatorium perfoliatum L.	5402874	EXACT	100	ACCEPTED	SPECIES	Plantae	Tracheophyta	Magnoliopsida	Asterales	Asteraceae	Eupatorium	Eupatorium perfoliatum	Eupatorium perfoliatum L.
2	Euphorbia corollata L. var. corollata	Euphorbia corollata var. corollata	7276373	EXACT	98	SYNONYM	VARIETY	Plantae	Tracheophyta	Magnoliopsida	Malpighiales	Euphorbiaceae	Euphorbia	Euphorbia corollata	Euphorbia corollata L.
2	Aster surculosus Michx.	Aster surculosus Michx.	5396105	EXACT	100	SYNONYM	SPECIES	Plantae	Tracheophyta	Magnoliopsida	Asterales	Asteraceae	Eurybia	Eurybia surculosa	Eurybia surculosa (Michx.) G.L.Nesom
2	Eupatorium fistulosum Barratt	Eupatorium fistulosum J.Barratt	8406520	EXACT	100	SYNONYM	SPECIES	Plantae	Tracheophyta	Magnoliopsida	Asterales	Asteraceae	Eutrochium	Eutrochium fistulosum	Eutrochium fistulosum (Barratt) E.E.Lamont
2	Fagus grandifolia Erhart.	Fagus grandiflora	7274483	FUZZY	92	ACCEPTED	SPECIES	Plantae	Tracheophyta	Magnoliopsida	Fagales	Fagaceae	Fagus	Fagus grandiflora	Fagus grandiflora
2	Oxypolis rigidior (L.) Raf.	Oxypolis rigidior (L.) Raf.	3034755	EXACT	100	SYNONYM	SPECIES	Plantae	Tracheophyta	Magnoliopsida	Apiales	Apiaceae	Ferula	Ferula communis	Ferula communis L.
2	Fimbristylis autumnalis (L.) R. & S.	Fimbristylis autumnalis Roem. & Schult.	2708280	EXACT	100	ACCEPTED	SPECIES	Plantae	Tracheophyta	Liliopsida	Poales	Cyperaceae	Fimbristylis	Fimbristylis autumnalis	Fimbristylis autumnalis Roem. & Schult.
2	Fragaria X ananassa Duchesne			NONE	100									Fragaria ananassa	Fragaria ananassa (Weston) Duchesne ex Rozier
2	Fragaria virginiana Duchesne	Fragaria virginiana Duchesne	7950792	EXACT	100	ACCEPTED	SPECIES	Plantae	Tracheophyta	Magnoliopsida	Rosales	Rosaceae	Fragaria	Fragaria virginiana	Fragaria virginiana Duchesne
2	Fraxinis americana L. var. americana	Fraxinus americana var. americana	7325897	FUZZY	84	SYNONYM	VARIETY	Plantae	Tracheophyta	Magnoliopsida	Lamiales	Oleaceae	Fraxinus	Fraxinus americana	Fraxinus americana L.
2	Fraxinis americana L. var. biltmoreana (Bea-	Fraxinus americana var. biltmoreana (Beadle) J.W.Wright ex Fernald	3172333	FUZZY	81	SYNONYM	VARIETY	Plantae	Tracheophyta	Magnoliopsida	Lamiales	Oleaceae	Fraxinus	Fraxinus americana	Fraxinus americana L.
2	Galactia volubilis (L.) Britton	Galactia volubilis (L.) Britton	2984194	EXACT	100	SYNONYM	SPECIES	Plantae	Tracheophyta	Magnoliopsida	Fabales	Fabaceae	Galactia	Galactia regularis	Galactia regularis Britton, Sterns & Poggenb.
2	Galax aphylla L.	Galax aphylla	5333325	EXACT	98	SYNONYM	SPECIES	Plantae	Tracheophyta	Magnoliopsida	Ericales	Diapensiaceae	Galax	Galax urceolata	Galax urceolata (Poir.) Brummitt
2	Orchis spectabilis L.	Orchis spectabilis L.	2850133	EXACT	100	SYNONYM	SPECIES	Plantae	Tracheophyta	Liliopsida	Asparagales	Orchidaceae	Galearis	Galearis spectabilis	Galearis spectabilis (L.) Raf.
2	Galium circaezans Michx.	Galium circaezans Michx.	2914722	EXACT	100	ACCEPTED	SPECIES	Plantae	Tracheophyta	Magnoliopsida	Gentianales	Rubiaceae	Galium	Galium circaezans	Galium circaezans Michx.
2	Galium pilosum Aiton.	Galium pilosum Aiton	2913935	EXACT	100	ACCEPTED	SPECIES	Plantae	Tracheophyta	Magnoliopsida	Gentianales	Rubiaceae	Galium	Galium pilosum	Galium pilosum Aiton
2	Galium tinctorium L.	Galium tinctorium L.	2913380	EXACT	100	ACCEPTED	SPECIES	Plantae	Tracheophyta	Magnoliopsida	Gentianales	Rubiaceae	Galium	Galium tinctorium	Galium tinctorium L.
2	Galium triflorum Michx.	Galium triflorum Michx.	2913463	EXACT	100	ACCEPTED	SPECIES	Plantae	Tracheophyta	Magnoliopsida	Gentianales	Rubiaceae	Galium	Galium triflorum	Galium triflorum Michx.
2	Gnaphalium purpureum L.	Gnaphalium purpureum L.	5390819	EXACT	100	SYNONYM	SPECIES	Plantae	Tracheophyta	Magnoliopsida	Asterales	Asteraceae	Gamochaeta	Gamochaeta purpurea	Gamochaeta purpurea (L.) Cabrera
2	Gaultheria procumbens L.	Gaultheria procumbens L.	2882753	EXACT	100	ACCEPTED	SPECIES	Plantae	Tracheophyta	Magnoliopsida	Ericales	Ericaceae	Gaultheria	Gaultheria procumbens	Gaultheria procumbens L.
2	Gaylussacia baccata (Wang.) K. Koch	Gaylussacia baccata K.Koch	2882739	EXACT	100	ACCEPTED	SPECIES	Plantae	Tracheophyta	Magnoliopsida	Ericales	Ericaceae	Gaylussacia	Gaylussacia baccata	Gaylussacia baccata K.Koch
2	Gaylussacia ursira (M.A. Curtis) T. & G. ex	Gaylussacia ursina (M.A.Curtis) Torr. & A.Gray	2882727	FUZZY	99	ACCEPTED	SPECIES	Plantae	Tracheophyta	Magnoliopsida	Ericales	Ericaceae	Gaylussacia	Gaylussacia ursina	Gaylussacia ursina (M.A.Curtis) Torr. & A.Gray
2	Gentiana decora Pollard	Gentiana decora Pollard	3170059	EXACT	100	ACCEPTED	SPECIES	Plantae	Tracheophyta	Magnoliopsida	Gentianales	Gentianaceae	Gentiana	Gentiana decora	Gentiana decora Pollard
2	Gentiana saponaria L.	Gentiana saponaria L.	3170086	EXACT	100	ACCEPTED	SPECIES	Plantae	Tracheophyta	Magnoliopsida	Gentianales	Gentianaceae	Gentiana	Gentiana saponaria	Gentiana saponaria L.
2	Gentiana villosa L.	Gentiana villosa L.	3170088	EXACT	100	ACCEPTED	SPECIES	Plantae	Tracheophyta	Magnoliopsida	Gentianales	Gentianaceae	Gentiana	Gentiana villosa	Gentiana villosa L.
2	Geranium maculatum L.	Geranium maculatum L.	7808016	EXACT	100	ACCEPTED	SPECIES	Plantae	Tracheophyta	Magnoliopsida	Geraniales	Geraniaceae	Geranium	Geranium maculatum	Geranium maculatum L.
2	Geum canadensis Jacquin	Geum canadense Jacq.	5369800	FUZZY	96	ACCEPTED	SPECIES	Plantae	Tracheophyta	Magnoliopsida	Rosales	Rosaceae	Geum	Geum canadense	Geum canadense Jacq.
2	Waldsteinia lobata (Baldw.) T. & G.	Waldsteinia lobata (Baldw.) Torr. & Gray	2986311	EXACT	100	SYNONYM	SPECIES	Plantae	Tracheophyta	Magnoliopsida	Rosales	Rosaceae	Geum	Geum lobatum	Geum lobatum (Baldwin) Smedmark
2	Gillenia trifoliata (L.) Moench.	Gillenia trifoliata Moench	2986435	EXACT	100	ACCEPTED	SPECIES	Plantae	Tracheophyta	Magnoliopsida	Rosales	Rosaceae	Gillenia	Gillenia trifoliata	Gillenia trifoliata Moench
2	Gleditsia triacanthos L.	Gleditsia triacanthos L.	2959443	EXACT	100	ACCEPTED	SPECIES	Plantae	Tracheophyta	Magnoliopsida	Fabales	Fabaceae	Gleditsia	Gleditsia triacanthos	Gleditsia triacanthos L.
2	Glyceria striata (Lam.) Hitchcock	Glyceria striata (Lam.) Hitchc.	2705503	EXACT	100	ACCEPTED	SPECIES	Plantae	Tracheophyta	Liliopsida	Poales	Poaceae	Glyceria	Glyceria striata	Glyceria striata (Lam.) Hitchc.
2	Glycine max (L.) Merrill	Glycine max (L.) Merr.	5359660	EXACT	100	ACCEPTED	SPECIES	Plantae	Tracheophyta	Magnoliopsida	Fabales	Fabaceae	Glycine	Glycine max	Glycine max (L.) Merr.
2	Matelea suberosa (L.) Shinners	Matelea suberosa (L.) Shinners	3170506	EXACT	100	SYNONYM	SPECIES	Plantae	Tracheophyta	Magnoliopsida	Gentianales	Apocynaceae	Gonolobus	Gonolobus suberosus	Gonolobus suberosus (L.) Schult.
2	Goodyerapubescens (Willd.) R. Brown	Goodyera pubescens R.Br.	2840768	FUZZY	95	ACCEPTED	SPECIES	Plantae	Tracheophyta	Liliopsida	Asparagales	Orchidaceae	Goodyera	Goodyera pubescens	Goodyera pubescens R.Br.
2	Gratiola virginiana L.	Gratiola virginiana L.	3171917	EXACT	100	ACCEPTED	SPECIES	Plantae	Tracheophyta	Magnoliopsida	Lamiales	Plantaginaceae	Gratiola	Gratiola virginiana	Gratiola virginiana L.
2	Halesia carolina L.	Halesia carolina L.	5371655	EXACT	100	ACCEPTED	SPECIES	Plantae	Tracheophyta	Magnoliopsida	Ericales	Styracaceae	Halesia	Halesia carolina	Halesia carolina L.
2	Hamamelis virginiana Michx.	Hamamelis virginiana L.	3152827	EXACT	83	ACCEPTED	SPECIES	Plantae	Tracheophyta	Magnoliopsida	Saxifragales	Hamamelidaceae	Hamamelis	Hamamelis virginiana	Hamamelis virginiana L.
2	Hedera helix L.	Hedera helix L.	8351737	EXACT	100	ACCEPTED	SPECIES	Plantae	Tracheophyta	Magnoliopsida	Apiales	Araliaceae	Hedera	Hedera helix	Hedera helix L.
2	Helenium amarum (Raf.) H. Rock	Helenium amarum (Raf.) H.Rock	5401836	EXACT	100	ACCEPTED	SPECIES	Plantae	Tracheophyta	Magnoliopsida	Asterales	Asteraceae	Helenium	Helenium amarum	Helenium amarum (Raf.) H.Rock
2	Helenium flexuosum Raf.	Helenium flexuosum Raf.	5401838	EXACT	100	ACCEPTED	SPECIES	Plantae	Tracheophyta	Magnoliopsida	Asterales	Asteraceae	Helenium	Helenium flexuosum	Helenium flexuosum Raf.
2	Helianthus atrorubens L.	Helianthus atrorubens L.	3119160	EXACT	100	ACCEPTED	SPECIES	Plantae	Tracheophyta	Magnoliopsida	Asterales	Asteraceae	Helianthus	Helianthus atrorubens	Helianthus atrorubens L.
2	Helianthus divaricatus L.	Helianthus divaricatus L.	3119249	EXACT	100	ACCEPTED	SPECIES	Plantae	Tracheophyta	Magnoliopsida	Asterales	Asteraceae	Helianthus	Helianthus divaricatus	Helianthus divaricatus L.
2	Helianthus hirsutus Raf.	Helianthus hirsutus Raf.	3119209	EXACT	100	ACCEPTED	SPECIES	Plantae	Tracheophyta	Magnoliopsida	Asterales	Asteraceae	Helianthus	Helianthus hirsutus	Helianthus hirsutus Raf.
2	Helianthus microcephalus T. & G.	Helianthus microcephalus Torr. & A.Gray	4250889	EXACT	100	ACCEPTED	SPECIES	Plantae	Tracheophyta	Magnoliopsida	Asterales	Asteraceae	Helianthus	Helianthus microcephalus	Helianthus microcephalus Torr. & A.Gray
2	Chrysogonum virginianum L. var. australe	Chrysogonum virginianum var. australe (Alexander ex Small) H.E.Ahles	4232724	EXACT	98	SYNONYM	VARIETY	Plantae	Tracheophyta	Magnoliopsida	Asterales	Asteraceae	Helianthus	Helianthus strumosus	Helianthus strumosus L.
2	Helianthus tomentosus Michx.	Helianthus tomentosus Michx.	3119178	EXACT	100	SYNONYM	SPECIES	Plantae	Tracheophyta	Magnoliopsida	Asterales	Asteraceae	Helianthus	Helianthus tuberosus	Helianthus tuberosus L.
2	Hemerocallis fulva L.	Hemerocallis fulva L.	2781074	EXACT	100	ACCEPTED	SPECIES	Plantae	Tracheophyta	Liliopsida	Asparagales	Asphodelaceae	Hemerocallis	Hemerocallis fulva	Hemerocallis fulva L.
2	Hepatica acutiloba DC.	Hepatica acutiloba DC.	6374883	EXACT	100	SYNONYM	SPECIES	Plantae	Tracheophyta	Magnoliopsida	Ranunculales	Ranunculaceae	Hepatica	Hepatica nobilis	Hepatica nobilis Schreb.
2	Hepatica americana (DC) Ker.	Hepatica americana (DC.) Ker-Gawl.	6374864	EXACT	88	SYNONYM	SPECIES	Plantae	Tracheophyta	Magnoliopsida	Ranunculales	Ranunculaceae	Hepatica	Hepatica nobilis	Hepatica nobilis Schreb.
2	Heuchera americana L.	Heuchera americana L.	3032665	EXACT	100	ACCEPTED	SPECIES	Plantae	Tracheophyta	Magnoliopsida	Saxifragales	Saxifragaceae	Heuchera	Heuchera americana	Heuchera americana L.
2	Heuchera parviflora Bartling	Heuchera parviflora Bartl.	3032678	EXACT	100	ACCEPTED	SPECIES	Plantae	Tracheophyta	Magnoliopsida	Saxifragales	Saxifragaceae	Heuchera	Heuchera parviflora	Heuchera parviflora Bartl.
2	Heuchera villosa Michx.	Heuchera villosa Michx.	3032655	EXACT	100	ACCEPTED	SPECIES	Plantae	Tracheophyta	Magnoliopsida	Saxifragales	Saxifragaceae	Heuchera	Heuchera villosa	Heuchera villosa Michx.
2	Diodia teres Walter	Diodia teres Walter	2901521	EXACT	100	SYNONYM	SPECIES	Plantae	Tracheophyta	Magnoliopsida	Gentianales	Rubiaceae	Hexasepalum	Hexasepalum teres	Hexasepalum teres (Walter) J.H.Kirkbr.
2	Hexastylis arifolia (Michx.) Small	Hexastylis arifolia Small	5331104	EXACT	100	ACCEPTED	SPECIES	Plantae	Tracheophyta	Magnoliopsida	Piperales	Aristolochiaceae	Hexastylis	Hexastylis arifolia	Hexastylis arifolia Small
2	Hexastylis heterophylla (Ashe) Small	Hexastylis heterophylla Small	5331107	EXACT	100	ACCEPTED	SPECIES	Plantae	Tracheophyta	Magnoliopsida	Piperales	Aristolochiaceae	Hexastylis	Hexastylis heterophylla	Hexastylis heterophylla Small
2	Hieracium gronovii L.	Hieracium gronovii L.	3136062	EXACT	100	ACCEPTED	SPECIES	Plantae	Tracheophyta	Magnoliopsida	Asterales	Asteraceae	Hieracium	Hieracium gronovii	Hieracium gronovii L.
2	Hordeum pusillum Nuttall	Hordeum pusillum Nutt.	2706070	EXACT	100	ACCEPTED	SPECIES	Plantae	Tracheophyta	Liliopsida	Poales	Poaceae	Hordeum	Hordeum pusillum	Hordeum pusillum Nutt.
2	Houstonia caerulea L.	Houstonia caerulea L.	5338866	EXACT	100	ACCEPTED	SPECIES	Plantae	Tracheophyta	Magnoliopsida	Gentianales	Rubiaceae	Houstonia	Houstonia caerulea	Houstonia caerulea L.
2	Houstonia purpurea L.	Houstonia purpurea L.	5338840	EXACT	100	ACCEPTED	SPECIES	Plantae	Tracheophyta	Magnoliopsida	Gentianales	Rubiaceae	Houstonia	Houstonia purpurea	Houstonia purpurea L.
2	Houstonia serpyllifolia Michx.	Houstonia serpyllifolia Michx.	5338825	EXACT	100	ACCEPTED	SPECIES	Plantae	Tracheophyta	Magnoliopsida	Gentianales	Rubiaceae	Houstonia	Houstonia serpyllifolia	Houstonia serpyllifolia Michx.
2	Lycopodium lucidulum Michx.	Lycopodium lucidulum Michx.	2688527	EXACT	100	SYNONYM	SPECIES	Plantae	Tracheophyta	Lycopodiopsida	Lycopodiales	Lycopodiaceae	Huperzia	Huperzia lucidula	Huperzia lucidula (Michx.) Trevis.
2	Hydrangea arborescens ssp. arborescens L.	Hydrangea arborescens subsp. arborescens	6549796	EXACT	98	SYNONYM	SUBSPECIES	Plantae	Tracheophyta	Magnoliopsida	Cornales	Hydrangeaceae	Hydrangea	Hydrangea arborescens	Hydrangea arborescens L.
2	Decumaria barbara L.	Decumaria barbara L.	2985969	EXACT	100	SYNONYM	SPECIES	Plantae	Tracheophyta	Magnoliopsida	Cornales	Hydrangeaceae	Hydrangea	Hydrangea barbara	Hydrangea barbara (L.) Bernd Schulz
2	Hypericum gentianoides (L.) BSP.	Hypericum gentianoides Britton	3189514	EXACT	81	ACCEPTED	SPECIES	Plantae	Tracheophyta	Magnoliopsida	Malpighiales	Hypericaceae	Hypericum	Hypericum gentianoides	Hypericum gentianoides Britton
2	Hypericum stragalum P. Adams & Robson	Hypericum stragulum P.Adams & N.Robson	7522357	FUZZY	97	SYNONYM	SPECIES	Plantae	Tracheophyta	Magnoliopsida	Malpighiales	Hypericaceae	Hypericum	Hypericum hypericoides	Hypericum hypericoides Crantz
2	Hypericum punctatum Lam.	Hypericum punctatum Lam.	3189495	EXACT	100	ACCEPTED	SPECIES	Plantae	Tracheophyta	Magnoliopsida	Malpighiales	Hypericaceae	Hypericum	Hypericum punctatum	Hypericum punctatum Lam.
2	Monotropa hypopithys L.	Monotropa hypopitys L.	8249145	FUZZY	99	SYNONYM	SPECIES	Plantae	Tracheophyta	Magnoliopsida	Ericales	Ericaceae	Hypopitys	Hypopitys monotropa	Hypopitys monotropa Crantz
2	Hypoxis hirsuta (L.) Coville	Hypoxis hirsuta Coville	2852794	EXACT	100	ACCEPTED	SPECIES	Plantae	Tracheophyta	Liliopsida	Asparagales	Hypoxidaceae	Hypoxis	Hypoxis hirsuta	Hypoxis hirsuta Coville
2	Ilex opaca Aiton	Ilex opaca Soland. ex Ait.	5414248	EXACT	100	ACCEPTED	SPECIES	Plantae	Tracheophyta	Magnoliopsida	Aquifoliales	Aquifoliaceae	Ilex	Ilex opaca	Ilex opaca Soland. ex Ait.
2	Impatiens capensis Meerb.	Impatiens capensis Meerb.	2891774	EXACT	100	ACCEPTED	SPECIES	Plantae	Tracheophyta	Magnoliopsida	Ericales	Balsaminaceae	Impatiens	Impatiens capensis	Impatiens capensis Meerb.
2	Aster linariifolius L.	Aster linariifolius L.	5396001	EXACT	100	SYNONYM	SPECIES	Plantae	Tracheophyta	Magnoliopsida	Asterales	Asteraceae	Ionactis	Ionactis linariifolia	Ionactis linariifolia Greene
2	Ipomoea pandurata (L.) G.F.W. Meyer	Ipomoea pandurata (L.) G.F.W.Mey.	2928514	EXACT	100	SYNONYM	SPECIES	Plantae	Tracheophyta	Magnoliopsida	Solanales	Convolvulaceae	Ipomoea	Ipomoea batatas	Ipomoea batatas (L.) Lam.
2	Ipomoea purpurea (L.) Roth	Ipomoea purpurea (L.) Roth	2928576	EXACT	100	ACCEPTED	SPECIES	Plantae	Tracheophyta	Magnoliopsida	Solanales	Convolvulaceae	Ipomoea	Ipomoea purpurea	Ipomoea purpurea (L.) Roth
2	Ipomoea coccinea L.	Ipomoea coccinea L.	2928560	EXACT	100	SYNONYM	SPECIES	Plantae	Tracheophyta	Magnoliopsida	Solanales	Convolvulaceae	Ipomoea	Ipomoea rubriflora	Ipomoea rubriflora O'Donell
2	Iris cristata Aiton	Iris cristata Aiton	8271039	EXACT	100	ACCEPTED	SPECIES	Plantae	Tracheophyta	Liliopsida	Asparagales	Iridaceae	Iris	Iris cristata	Iris cristata Aiton
2	Iris verna var. smalliana Fernald	Iris verna var. smalliana Fernald	5298318	EXACT	100	DOUBTFUL	VARIETY	Plantae	Tracheophyta	Liliopsida	Asparagales	Iridaceae	Iris	Iris verna	Iris verna L.
2	Itea virginica L.	Itea virginica L.	5362113	EXACT	100	ACCEPTED	SPECIES	Plantae	Tracheophyta	Magnoliopsida	Saxifragales	Iteaceae	Itea	Itea virginica	Itea virginica L.
2	Juglans cinerea L.	Juglans cinerea L.	3054352	EXACT	100	ACCEPTED	SPECIES	Plantae	Tracheophyta	Magnoliopsida	Fagales	Juglandaceae	Juglans	Juglans cinerea	Juglans cinerea L.
2	Juglans nigra L.	Juglans nigra L.	3054357	EXACT	100	ACCEPTED	SPECIES	Plantae	Tracheophyta	Magnoliopsida	Fagales	Juglandaceae	Juglans	Juglans nigra	Juglans nigra L.
2	Juncus acuminatus Michx.	Juncus acuminatus Michx.	2701323	EXACT	100	ACCEPTED	SPECIES	Plantae	Tracheophyta	Liliopsida	Poales	Juncaceae	Juncus	Juncus acuminatus	Juncus acuminatus Michx.
2	Juncus coriaceus Mackenzie.	Juncus coriaceus Mack.	2701445	EXACT	100	ACCEPTED	SPECIES	Plantae	Tracheophyta	Liliopsida	Poales	Juncaceae	Juncus	Juncus coriaceus	Juncus coriaceus Mack.
2	Juncus effusus L.	Juncus effusus L.	2701311	EXACT	100	ACCEPTED	SPECIES	Plantae	Tracheophyta	Liliopsida	Poales	Juncaceae	Juncus	Juncus effusus	Juncus effusus L.
2	Juncus tenuis Willd.	Juncus tenuis Willd.	2702084	EXACT	100	ACCEPTED	SPECIES	Plantae	Tracheophyta	Liliopsida	Poales	Juncaceae	Juncus	Juncus tenuis	Juncus tenuis Willd.
2	Juniperus virginiana L.	Juniperus virginiana L.	2684391	EXACT	100	ACCEPTED	SPECIES	Plantae	Tracheophyta	Pinopsida	Pinales	Cupressaceae	Juniperus	Juniperus virginiana	Juniperus virginiana L.
2	Kalmia latifolia L.	Kalmia latifolia L.	2883005	EXACT	100	ACCEPTED	SPECIES	Plantae	Tracheophyta	Magnoliopsida	Ericales	Ericaceae	Kalmia	Kalmia latifolia	Kalmia latifolia L.
2	Krigia virginica (L.) Willd.	Krigia virginica Willd.	3132412	EXACT	100	ACCEPTED	SPECIES	Plantae	Tracheophyta	Magnoliopsida	Asterales	Asteraceae	Krigia	Krigia virginica	Krigia virginica Willd.
2	Lactuca canadensis L.	Lactuca canadensis L.	3140315	EXACT	100	ACCEPTED	SPECIES	Plantae	Tracheophyta	Magnoliopsida	Asterales	Asteraceae	Lactuca	Lactuca canadensis	Lactuca canadensis L.
2	Lactuca floridana (L.) Gaertner	Lactuca floridana (L.) Gaertn.	3140423	EXACT	100	ACCEPTED	SPECIES	Plantae	Tracheophyta	Magnoliopsida	Asterales	Asteraceae	Lactuca	Lactuca floridana	Lactuca floridana (L.) Gaertn.
2	Lagerstroemia indica L.	Lagerstroemia indica L.	3188725	EXACT	100	ACCEPTED	SPECIES	Plantae	Tracheophyta	Magnoliopsida	Myrtales	Lythraceae	Lagerstroemia	Lagerstroemia indica	Lagerstroemia indica L.
2	Laportea canadensis (L.) Weddell	Laportea canadensis Wedd.	2984463	EXACT	100	ACCEPTED	SPECIES	Plantae	Tracheophyta	Magnoliopsida	Rosales	Urticaceae	Laportea	Laportea canadensis	Laportea canadensis Wedd.
2	Lechea racemulosa Michx.	Lechea racemulosa Michx.	5331120	EXACT	100	DOUBTFUL	SPECIES	Plantae	Tracheophyta	Magnoliopsida	Malvales	Cistaceae	Lechea	Lechea racemulosa	Lechea racemulosa Lam.
2	Leersia oryzoides (L.) Swartz	Leersia oryzoides (L.) Sw.	2702905	EXACT	100	ACCEPTED	SPECIES	Plantae	Tracheophyta	Liliopsida	Poales	Poaceae	Leersia	Leersia oryzoides	Leersia oryzoides (L.) Sw.
2	Leersia virginica Willd.	Leersia virginica Willd.	7325335	EXACT	100	ACCEPTED	SPECIES	Plantae	Tracheophyta	Liliopsida	Poales	Poaceae	Leersia	Leersia virginica	Leersia virginica Willd.
2	Lepidium virginicum L.	Lepidium virginicum L.	5376648	EXACT	100	ACCEPTED	SPECIES	Plantae	Tracheophyta	Magnoliopsida	Brassicales	Brassicaceae	Lepidium	Lepidium virginicum	Lepidium virginicum L.
2	Lespedeza bicolor Turzc.	Lespedeza Michx.	2955600	HIGHERRANK	94	ACCEPTED	GENUS	Plantae	Tracheophyta	Magnoliopsida	Fabales	Fabaceae	Lespedeza	Lespedeza bicolor	Lespedeza bicolor Turcz.
2	Lespedeza cuneata (Dumont) G. Don	Lespedeza cuneata (Dum.Cours.) G.Don	8114276	EXACT	99	SYNONYM	SPECIES	Plantae	Tracheophyta	Magnoliopsida	Fabales	Fabaceae	Lespedeza	Lespedeza juncea	Lespedeza juncea (L.) Pers.
2	Lespedeza repens (L.) Barton.	Lespedeza repens Barton	2955745	EXACT	100	ACCEPTED	SPECIES	Plantae	Tracheophyta	Magnoliopsida	Fabales	Fabaceae	Lespedeza	Lespedeza repens	Lespedeza repens Barton
2	Chrysanthemum leucanthemum L.	Chrysanthemum leucanthemum L.	3134125	EXACT	100	SYNONYM	SPECIES	Plantae	Tracheophyta	Magnoliopsida	Asterales	Asteraceae	Leucanthemum	Leucanthemum vulgare	Leucanthemum vulgare Lam.
2	Leucothoe axillaris (Lam.) D. Don var. editor	Leucothoe axillaris var. editorum (Fernald & B.G.Schub.) H.E.Ahles	4174638	FUZZY	94	SYNONYM	VARIETY	Plantae	Tracheophyta	Magnoliopsida	Ericales	Ericaceae	Leucothoe	Leucothoe fontanesiana	Leucothoe fontanesiana (Steud.) Sleumer
2	Liatris graminifolia Wild.	Liatris Schreb.	3104263	HIGHERRANK	94	ACCEPTED	GENUS	Plantae	Tracheophyta	Magnoliopsida	Asterales	Asteraceae	Liatris	Liatris pilosa	Liatris pilosa Willd.
2	Liatris scariosa (L.) Willd.	Liatris scariosa (L.) Willd.	3104328	EXACT	100	ACCEPTED	SPECIES	Plantae	Tracheophyta	Magnoliopsida	Asterales	Asteraceae	Liatris	Liatris scariosa	Liatris scariosa (L.) Willd.
2	Liatris spicata (L.) Willd.	Liatris spicata Willd.	3104314	EXACT	100	ACCEPTED	SPECIES	Plantae	Tracheophyta	Magnoliopsida	Asterales	Asteraceae	Liatris	Liatris spicata	Liatris spicata Willd.
2	Ligusticum canadense (L.) Britton	Ligusticum canadense Britton	3034793	EXACT	100	ACCEPTED	SPECIES	Plantae	Tracheophyta	Magnoliopsida	Apiales	Apiaceae	Ligusticum	Ligusticum canadense	Ligusticum canadense Britton
2	Ligustrum sinense Lour.	Ligustrum sinense Lour.	3172294	EXACT	100	ACCEPTED	SPECIES	Plantae	Tracheophyta	Magnoliopsida	Lamiales	Oleaceae	Ligustrum	Ligustrum sinense	Ligustrum sinense Lour.
2	Lilium michauxii Poiret.	Lilium michauxii Poir.	2753428	EXACT	100	ACCEPTED	SPECIES	Plantae	Tracheophyta	Liliopsida	Liliales	Liliaceae	Lilium	Lilium michauxii	Lilium michauxii Poir.
2	Lindera benzoin (L.) Blume	Lindera benzoin Blume	5371740	EXACT	100	DOUBTFUL	SPECIES	Plantae	Tracheophyta	Magnoliopsida	Laurales	Lauraceae	Lindera	Lindera benzoin	Lindera benzoin Meisn.
2	Linum striatum Walter	Linum striatum Walter	2873857	EXACT	100	ACCEPTED	SPECIES	Plantae	Tracheophyta	Magnoliopsida	Malpighiales	Linaceae	Linum	Linum striatum	Linum striatum Walter
2	Liquidambar styraciflua L.	Liquidambar styraciflua L.	3152824	EXACT	100	ACCEPTED	SPECIES	Plantae	Tracheophyta	Magnoliopsida	Saxifragales	Altingiaceae	Liquidambar	Liquidambar styraciflua	Liquidambar styraciflua L.
2	Liriodendron tulipifera L.	Liriodendron tulipifera L.	3152861	EXACT	100	ACCEPTED	SPECIES	Plantae	Tracheophyta	Magnoliopsida	Magnoliales	Magnoliaceae	Liriodendron	Liriodendron tulipifera	Liriodendron tulipifera L.
2	Lobelia cardinalis L.	Lobelia cardinalis L.	5408269	EXACT	100	ACCEPTED	SPECIES	Plantae	Tracheophyta	Magnoliopsida	Asterales	Campanulaceae	Lobelia	Lobelia cardinalis	Lobelia cardinalis L.
2	Lobelia inflata L.	Lobelia inflata L.	5408737	EXACT	100	ACCEPTED	SPECIES	Plantae	Tracheophyta	Magnoliopsida	Asterales	Campanulaceae	Lobelia	Lobelia inflata	Lobelia inflata L.
2	Lobelia puberula Michx.	Lobelia puberula Michx.	5408342	EXACT	100	ACCEPTED	SPECIES	Plantae	Tracheophyta	Magnoliopsida	Asterales	Campanulaceae	Lobelia	Lobelia puberula	Lobelia puberula Michx.
2	Lobelia spicata Lam.	Lobelia spicata Lam.	5408750	EXACT	100	ACCEPTED	SPECIES	Plantae	Tracheophyta	Magnoliopsida	Asterales	Campanulaceae	Lobelia	Lobelia spicata	Lobelia spicata Lam.
2	Lolium multiflorum Lam.	Lolium multiflorum Lam.	4129708	EXACT	100	ACCEPTED	SPECIES	Plantae	Tracheophyta	Liliopsida	Poales	Poaceae	Lolium	Lolium multiflorum	Lolium multiflorum Lam.
2	Lonicera japonica Thunberg	Lonicera japonica Thunb.	5334240	EXACT	100	ACCEPTED	SPECIES	Plantae	Tracheophyta	Magnoliopsida	Dipsacales	Caprifoliaceae	Lonicera	Lonicera japonica	Lonicera japonica Thunb.
2	Lonicera sempervirens L.	Lonicera sempervirens L.	5334239	EXACT	100	ACCEPTED	SPECIES	Plantae	Tracheophyta	Magnoliopsida	Dipsacales	Caprifoliaceae	Lonicera	Lonicera sempervirens	Lonicera sempervirens L.
2	Ludwigia alternifolia L.	Ludwigia alternifolia L.	5420992	EXACT	100	ACCEPTED	SPECIES	Plantae	Tracheophyta	Magnoliopsida	Myrtales	Onagraceae	Ludwigia	Ludwigia alternifolia	Ludwigia alternifolia L.
2	Ludwigia decurrens Walter	Ludwigia decurrens Walter	5421002	EXACT	100	ACCEPTED	SPECIES	Plantae	Tracheophyta	Magnoliopsida	Myrtales	Onagraceae	Ludwigia	Ludwigia decurrens	Ludwigia decurrens Walter
2	Luzula acuminata Raf.	Luzula acuminata Raf.	2700818	EXACT	100	ACCEPTED	SPECIES	Plantae	Tracheophyta	Liliopsida	Poales	Juncaceae	Luzula	Luzula acuminata	Luzula acuminata Raf.
2	Luzula multiflora (Retzius) Lej.	Luzula multiflora (Retz.) Lej.	2700934	EXACT	100	SYNONYM	SPECIES	Plantae	Tracheophyta	Liliopsida	Poales	Juncaceae	Luzula	Luzula lutea	Luzula lutea DC.
2	Lycopus virginicus L., Water	Lycopus virginicus L.	5341476	EXACT	100	ACCEPTED	SPECIES	Plantae	Tracheophyta	Magnoliopsida	Lamiales	Lamiaceae	Lycopus	Lycopus virginicus	Lycopus virginicus L.
2	Lygodium palmatum (Bernh.) Swartz	Lygodium palmatum (Bernh.) Sw.	2650432	EXACT	100	ACCEPTED	SPECIES	Plantae	Tracheophyta	Polypodiopsida	Schizaeales	Lygodiaceae	Lygodium	Lygodium palmatum	Lygodium palmatum (Bernh.) Sw.
2	Lyonia ligustrina (L.) DC.	Lyonia ligustrina DC.	5333391	EXACT	100	ACCEPTED	SPECIES	Plantae	Tracheophyta	Magnoliopsida	Ericales	Ericaceae	Lyonia	Lyonia ligustrina	Lyonia ligustrina DC.
2	Lysimachia ciliata L.	Lysimachia ciliata L.	3169391	EXACT	100	ACCEPTED	SPECIES	Plantae	Tracheophyta	Magnoliopsida	Ericales	Primulaceae	Lysimachia	Lysimachia ciliata	Lysimachia ciliata L.
2	Lysimachia fraseri Duby	Lysimachia fraseri Duby	3169354	EXACT	100	ACCEPTED	SPECIES	Plantae	Tracheophyta	Magnoliopsida	Ericales	Primulaceae	Lysimachia	Lysimachia fraseri	Lysimachia fraseri Duby
2	Lysimachia quadrifolia L.	Lysimachia quadrifolia L.	3169357	EXACT	100	ACCEPTED	SPECIES	Plantae	Tracheophyta	Magnoliopsida	Ericales	Primulaceae	Lysimachia	Lysimachia quadrifolia	Lysimachia quadrifolia L.
2	Magnolia acuminata L.	Magnolia acuminata L.	3153837	EXACT	100	ACCEPTED	SPECIES	Plantae	Tracheophyta	Magnoliopsida	Magnoliales	Magnoliaceae	Magnolia	Magnolia acuminata	Magnolia acuminata L.
2	Magnolia fraseri Walter	Magnolia fraseri Walter	3153619	EXACT	100	ACCEPTED	SPECIES	Plantae	Tracheophyta	Magnoliopsida	Magnoliales	Magnoliaceae	Magnolia	Magnolia fraseri	Magnolia fraseri Walter
2	Smilacina racemosa (L.) Desf.	Smilacina racemosa (L.) Desf.	2769490	EXACT	100	SYNONYM	SPECIES	Plantae	Tracheophyta	Liliopsida	Asparagales	Asparagaceae	Maianthemum	Maianthemum racemosum	Maianthemum racemosum Link
2	Malus angustifolia (Aiton) Michx.	Malus angustifolia (Aiton) Michx.	3001548	EXACT	100	ACCEPTED	SPECIES	Plantae	Tracheophyta	Magnoliopsida	Rosales	Rosaceae	Malus	Malus angustifolia	Malus angustifolia (Aiton) Michx.
2	Malus pumila Miller	Malus pumila Mill.	3001093	EXACT	100	ACCEPTED	SPECIES	Plantae	Tracheophyta	Magnoliopsida	Rosales	Rosaceae	Malus	Malus pumila	Malus pumila Mill.
2	Medeola virginiana L.	Medeola virginiana L.	2750658	EXACT	100	ACCEPTED	SPECIES	Plantae	Tracheophyta	Liliopsida	Liliales	Liliaceae	Medeola	Medeola virginiana	Medeola virginiana L.
2	Melica mutica Walter	Melica mutica Walter	2703127	EXACT	100	ACCEPTED	SPECIES	Plantae	Tracheophyta	Liliopsida	Poales	Poaceae	Melica	Melica mutica	Melica mutica Walter
2	Saxifraga virginiensis Michx.	Saxifraga virginiensis Michx.	3032764	EXACT	100	SYNONYM	SPECIES	Plantae	Tracheophyta	Magnoliopsida	Saxifragales	Saxifragaceae	Micranthes	Micranthes virginiensis	Micranthes virginiensis Small
2	Microstegium vimineum (Trinius) A. Camus	Microstegium vimineum (Trin.) A.Camus	5289808	EXACT	100	ACCEPTED	SPECIES	Plantae	Tracheophyta	Liliopsida	Poales	Poaceae	Microstegium	Microstegium vimineum	Microstegium vimineum (Trin.) A.Camus
2	Mimulus ringens L.	Mimulus ringens L.	6070732	EXACT	100	ACCEPTED	SPECIES	Plantae	Tracheophyta	Magnoliopsida	Lamiales	Phrymaceae	Mimulus	Mimulus ringens	Mimulus ringens L.
2	Mitchella repens L.	Mitchella repens L.	5338762	EXACT	100	ACCEPTED	SPECIES	Plantae	Tracheophyta	Magnoliopsida	Gentianales	Rubiaceae	Mitchella	Mitchella repens	Mitchella repens L.
2	Monarda clinopodia L.	Monarda clinopodia L.	5341398	EXACT	100	ACCEPTED	SPECIES	Plantae	Tracheophyta	Magnoliopsida	Lamiales	Lamiaceae	Monarda	Monarda clinopodia	Monarda clinopodia L.
2	Monotropa uniflora L.	Monotropa uniflora L.	2888353	EXACT	100	ACCEPTED	SPECIES	Plantae	Tracheophyta	Magnoliopsida	Ericales	Ericaceae	Monotropa	Monotropa uniflora	Monotropa uniflora L.
2	Morus rubra L.	Morus rubra L.	5361886	EXACT	100	ACCEPTED	SPECIES	Plantae	Tracheophyta	Magnoliopsida	Rosales	Moraceae	Morus	Morus rubra	Morus rubra L.
2	Cheilanthes tomentosa Link	Cheilanthes tomentosa Link	2651751	EXACT	100	SYNONYM	SPECIES	Plantae	Tracheophyta	Polypodiopsida	Polypodiales	Pteridaceae	Myriopteris	Myriopteris tomentosa	Myriopteris tomentosa F
2	Prenanthes serpentaria Pursh	Prenanthes serpentaria Pursh	3090770	EXACT	100	SYNONYM	SPECIES	Plantae	Tracheophyta	Magnoliopsida	Asterales	Asteraceae	Nabalus	Nabalus serpentarius	Nabalus serpentarius Hook.
2	Nyssa sylvatica Marshall	Nyssa sylvatica Marshall	5383717	EXACT	100	ACCEPTED	SPECIES	Plantae	Tracheophyta	Magnoliopsida	Cornales	Nyssaceae	Nyssa	Nyssa sylvatica	Nyssa sylvatica Marshall
2	Obolaria virginica L.	Obolaria virginica L.	5414495	EXACT	100	ACCEPTED	SPECIES	Plantae	Tracheophyta	Magnoliopsida	Gentianales	Gentianaceae	Obolaria	Obolaria virginica	Obolaria virginica L.
2	Oenothera biennis L.	Oenothera biennis L.	3188924	EXACT	100	ACCEPTED	SPECIES	Plantae	Tracheophyta	Magnoliopsida	Myrtales	Onagraceae	Oenothera	Oenothera biennis	Oenothera biennis L.
2	Oenothera tetragona Roth	Oenothera tetragona Roth	6427785	EXACT	100	SYNONYM	SPECIES	Plantae	Tracheophyta	Magnoliopsida	Myrtales	Onagraceae	Oenothera	Oenothera fruticosa	Oenothera fruticosa L.
2	Oenothera laciniata Hill	Oenothera laciniata Hill	3188867	EXACT	100	ACCEPTED	SPECIES	Plantae	Tracheophyta	Magnoliopsida	Myrtales	Onagraceae	Oenothera	Oenothera laciniata	Oenothera laciniata Hill
2	Onoclea sensibilis L.	Onoclea sensibilis L.	2650903	EXACT	100	ACCEPTED	SPECIES	Plantae	Tracheophyta	Polypodiopsida	Polypodiales	Onocleaceae	Onoclea	Onoclea sensibilis	Onoclea sensibilis L.
2	Osmunda regalis var. spectabilis (Wilid.)	Osmunda regalis var. spectabilis (Willd.) A.Gray	6425048	EXACT	95	SYNONYM	VARIETY	Plantae	Tracheophyta	Polypodiopsida	Osmundales	Osmundaceae	Osmunda	Osmunda spectabilis	Osmunda spectabilis Willd.
2	Osmunda cinnamomea L.	Osmunda cinnamomea L.	2651326	EXACT	100	SYNONYM	SPECIES	Plantae	Tracheophyta	Polypodiopsida	Osmundales	Osmundaceae	Osmundastrum	Osmundastrum cinnamomeum	Osmundastrum cinnamomeum (L.) C.Presl
2	Ostrya virginiana (Miller) K. Koch.	Ostrya virginiana K.Koch	5332289	EXACT	100	ACCEPTED	SPECIES	Plantae	Tracheophyta	Magnoliopsida	Fagales	Betulaceae	Ostrya	Ostrya virginiana	Ostrya virginiana K.Koch
2	Oxalis dillenii Jacquin	Oxalis dillenii Jacq.	2891677	EXACT	100	ACCEPTED	SPECIES	Plantae	Tracheophyta	Magnoliopsida	Oxalidales	Oxalidaceae	Oxalis	Oxalis dillenii	Oxalis dillenii Jacq.
2	Oxalis violacea L.	Oxalis violacea L.	2891708	EXACT	100	ACCEPTED	SPECIES	Plantae	Tracheophyta	Magnoliopsida	Oxalidales	Oxalidaceae	Oxalis	Oxalis violacea	Oxalis violacea L.
2	Oxydendrum arboreum (L.) DC.	Oxydendrum arboreum DC.	2882708	EXACT	100	ACCEPTED	SPECIES	Plantae	Tracheophyta	Magnoliopsida	Ericales	Ericaceae	Oxydendrum	Oxydendrum arboreum	Oxydendrum arboreum DC.
2	Senecio smallii Britton	Senecio smallii Britton, 1893	3113930	EXACT	100	SYNONYM	SPECIES	Plantae	Tracheophyta	Magnoliopsida	Asterales	Asteraceae	Packera	Packera anonyma	Packera anonyma (Wood) W.A.Weber & √Å.L√∂ve
2	Panax quinquefolium L.	Panax quinquefolius L.	5372246	FUZZY	99	ACCEPTED	SPECIES	Plantae	Tracheophyta	Magnoliopsida	Apiales	Araliaceae	Panax	Panax quinquefolius	Panax quinquefolius L.
2	Panicum acuminatum Swartz	Panicum acuminatum Sw.	7985821	EXACT	100	ACCEPTED	SPECIES	Plantae	Tracheophyta	Liliopsida	Poales	Poaceae	Panicum	Panicum acuminatum	Panicum acuminatum Sw.
2	Panicum ovale var. pseudopubescens (Nash)	Panicum ovale var. pseudopubescens (Nash) Lelong	4131583	EXACT	99	SYNONYM	VARIETY	Plantae	Tracheophyta	Liliopsida	Poales	Poaceae	Panicum	Panicum acuminatum	Panicum acuminatum Sw.
2	Panicum boscii Poiret	Panicum boscii Poir.	2702589	EXACT	100	ACCEPTED	SPECIES	Plantae	Tracheophyta	Liliopsida	Poales	Poaceae	Panicum	Panicum boscii	Panicum boscii Poir.
2	Panicum commutatum Schultes	Panicum commutatum Schult.	2702607	EXACT	100	ACCEPTED	SPECIES	Plantae	Tracheophyta	Liliopsida	Poales	Poaceae	Panicum	Panicum commutatum	Panicum commutatum Schult.
2	Panicum commutatum Schultes var. ashei	Panicum commutatum var. ashei (T.G.Pearson ex Ashe) Fernald	2702611	EXACT	98	SYNONYM	VARIETY	Plantae	Tracheophyta	Liliopsida	Poales	Poaceae	Panicum	Panicum commutatum	Panicum commutatum Schult.
2	Panicum dichotomum L.	Panicum dichotomum L.	4148267	EXACT	100	ACCEPTED	SPECIES	Plantae	Tracheophyta	Liliopsida	Poales	Poaceae	Panicum	Panicum dichotomum	Panicum dichotomum L.
2	Panicum dichotomum var. ramulosum (Tor-	Panicum dichotomum var. ramulosum (Torr.) Lelong	4148361	EXACT	98	SYNONYM	VARIETY	Plantae	Tracheophyta	Liliopsida	Poales	Poaceae	Panicum	Panicum dichotomum	Panicum dichotomum L.
2	Panicum laxiflorum Lam.	Panicum laxiflorum Lam.	2702598	EXACT	100	ACCEPTED	SPECIES	Plantae	Tracheophyta	Liliopsida	Poales	Poaceae	Panicum	Panicum laxiflorum	Panicum laxiflorum Lam.
2	Panicum polyanthes Schyltes	Panicum polyanthes Schult.	4128988	EXACT	83	ACCEPTED	SPECIES	Plantae	Tracheophyta	Liliopsida	Poales	Poaceae	Panicum	Panicum polyanthes	Panicum polyanthes Schult.
2	Panicum scoparium Lam.	Panicum scoparium Lam.	8240850	EXACT	100	ACCEPTED	SPECIES	Plantae	Tracheophyta	Liliopsida	Poales	Poaceae	Panicum	Panicum scoparium	Panicum scoparium Lam.
2	Thelypteris noveboracensis (L.) Nieuwland	Thelypteris noveboracensis (L.) Nieuwl.	5275242	EXACT	100	SYNONYM	SPECIES	Plantae	Tracheophyta	Polypodiopsida	Polypodiales	Thelypteridaceae	Parathelypteris	Parathelypteris noveboracensis	Parathelypteris noveboracensis (L.) Ching
2	Parnassia asarifolia Vent.	Parnassia asarifolia Vent.	3032581	EXACT	100	ACCEPTED	SPECIES	Plantae	Tracheophyta	Magnoliopsida	Celastrales	Celastraceae	Parnassia	Parnassia asarifolia	Parnassia asarifolia Vent.
2	Parthenium integrifolium L.	Parthenium integrifolium L.	3086802	EXACT	100	ACCEPTED	SPECIES	Plantae	Tracheophyta	Magnoliopsida	Asterales	Asteraceae	Parthenium	Parthenium integrifolium	Parthenium integrifolium L.
2	Parthenocissus quinquefolia (L.) Planchon	Parthenocissus quinquefolia (L.) Planch.	3039194	EXACT	100	ACCEPTED	SPECIES	Plantae	Tracheophyta	Magnoliopsida	Vitales	Vitaceae	Parthenocissus	Parthenocissus quinquefolia	Parthenocissus quinquefolia (L.) Planch.
2	Paspalum boscianum Flugge.	Paspalum boscianum Fl√ºgg√©	2705599	EXACT	100	SYNONYM	SPECIES	Plantae	Tracheophyta	Liliopsida	Poales	Poaceae	Paspalum	Paspalum scrobiculatum	Paspalum scrobiculatum L.
2	Passiflora incarnata L.	Passiflora incarnata L.	2874218	EXACT	100	ACCEPTED	SPECIES	Plantae	Tracheophyta	Magnoliopsida	Malpighiales	Passifloraceae	Passiflora	Passiflora incarnata	Passiflora incarnata L.
2	Passiflora lutea L.	Passiflora lutea L.	2874220	EXACT	100	ACCEPTED	SPECIES	Plantae	Tracheophyta	Magnoliopsida	Malpighiales	Passifloraceae	Passiflora	Passiflora lutea	Passiflora lutea L.
2	Paulownia tomentosa (Thunberg) Steudel	Paulownia tomentosa Steud.	3170823	EXACT	100	ACCEPTED	SPECIES	Plantae	Tracheophyta	Magnoliopsida	Lamiales	Paulowniaceae	Paulownia	Paulownia tomentosa	Paulownia tomentosa Steud.
2	Pedicularis canadensis L.	Pedicularis canadensis L.	3171674	EXACT	100	ACCEPTED	SPECIES	Plantae	Tracheophyta	Magnoliopsida	Lamiales	Orobanchaceae	Pedicularis	Pedicularis canadensis	Pedicularis canadensis L.
2	Penstemon australis Small	Penstemon australis Small	3171553	EXACT	100	ACCEPTED	SPECIES	Plantae	Tracheophyta	Magnoliopsida	Lamiales	Plantaginaceae	Penstemon	Penstemon australis	Penstemon australis Small
2	Polygonum cespitosum var. longisetum (De	Polygonum cespitosum var. longisetum (Bruijn) A.Stewart	5708407	EXACT	98	SYNONYM	VARIETY	Plantae	Tracheophyta	Magnoliopsida	Caryophyllales	Polygonaceae	Persicaria	Persicaria longiseta	Persicaria longiseta (Bruijn) Kitag.
2	Polygonum sagittatum L.	Polygonum sagittatum L.	5334307	EXACT	100	SYNONYM	SPECIES	Plantae	Tracheophyta	Magnoliopsida	Caryophyllales	Polygonaceae	Persicaria	Persicaria sagittata	Persicaria sagittata (L.) H.Gross
2	Tovara virginiana (L.) Raf.	Tovara virginiana (L.) Raf.	2889321	EXACT	100	SYNONYM	SPECIES	Plantae	Tracheophyta	Magnoliopsida	Caryophyllales	Polygonaceae	Persicaria	Persicaria virginiana	Persicaria virginiana (L.) Gaertn.
2	Thelypteris hexagonoptera (Michx.) Weatherby	Thelypteris hexagonoptera (Michx.) Weath.	5275217	EXACT	100	SYNONYM	SPECIES	Plantae	Tracheophyta	Polypodiopsida	Polypodiales	Thelypteridaceae	Phegopteris	Phegopteris hexagonoptera	Phegopteris hexagonoptera F√©e
2	Philadelphus hirsutus Nuttall	Philadelphus hirsutus Nutt.	2986048	EXACT	100	ACCEPTED	SPECIES	Plantae	Tracheophyta	Magnoliopsida	Cornales	Hydrangeaceae	Philadelphus	Philadelphus hirsutus	Philadelphus hirsutus Nutt.
2	Phlox amoena Sims	Phlox amoena Sims	2927711	EXACT	100	ACCEPTED	SPECIES	Plantae	Tracheophyta	Magnoliopsida	Ericales	Polemoniaceae	Phlox	Phlox amoena	Phlox amoena Sims
2	Phlox carolina L.	Phlox carolina L.	2927756	EXACT	100	ACCEPTED	SPECIES	Plantae	Tracheophyta	Magnoliopsida	Ericales	Polemoniaceae	Phlox	Phlox carolina	Phlox carolina L.
2	Phlox paniculata L.	Phlox paniculata L.	2927744	EXACT	100	ACCEPTED	SPECIES	Plantae	Tracheophyta	Magnoliopsida	Ericales	Polemoniaceae	Phlox	Phlox paniculata	Phlox paniculata L.
2	Phlox stolonifera Sims	Phlox stolonifera Sims	2927738	EXACT	100	ACCEPTED	SPECIES	Plantae	Tracheophyta	Magnoliopsida	Ericales	Polemoniaceae	Phlox	Phlox stolonifera	Phlox stolonifera Sims
2	Phryma leptostachya L.	Phryma leptostachya L.	2925445	EXACT	100	ACCEPTED	SPECIES	Plantae	Tracheophyta	Magnoliopsida	Lamiales	Phrymaceae	Phryma	Phryma leptostachya	Phryma leptostachya L.
2	Phytolacca americana L.	Phytolacca americana L.	3084015	EXACT	100	ACCEPTED	SPECIES	Plantae	Tracheophyta	Magnoliopsida	Caryophyllales	Phytolaccaceae	Phytolacca	Phytolacca americana	Phytolacca americana L.
2	Hieracium venosum L.	Hieracium venosum L.	3135852	EXACT	100	SYNONYM	SPECIES	Plantae	Tracheophyta	Magnoliopsida	Asterales	Asteraceae	Pilosella	Pilosella venosa	Pilosella venosa F.W.Schultz & Sch.Bip.
2	Pinus echinata Miller	Pinus echinata Mill.	5285324	EXACT	100	ACCEPTED	SPECIES	Plantae	Tracheophyta	Pinopsida	Pinales	Pinaceae	Pinus	Pinus echinata	Pinus echinata Mill.
2	Pinus pungens Lambert	Pinus pungens Lamb.	5285139	EXACT	100	ACCEPTED	SPECIES	Plantae	Tracheophyta	Pinopsida	Pinales	Pinaceae	Pinus	Pinus pungens	Pinus pungens Lamb.
2	Pinus rigida Miller	Pinus rigida Mill.	5285635	EXACT	100	ACCEPTED	SPECIES	Plantae	Tracheophyta	Pinopsida	Pinales	Pinaceae	Pinus	Pinus rigida	Pinus rigida Mill.
2	Pinus strobus L.	Pinus strobus L.	5284982	EXACT	100	ACCEPTED	SPECIES	Plantae	Tracheophyta	Pinopsida	Pinales	Pinaceae	Pinus	Pinus strobus	Pinus strobus L.
2	Pinus taeda L.	Pinus taeda L.	5285241	EXACT	100	ACCEPTED	SPECIES	Plantae	Tracheophyta	Pinopsida	Pinales	Pinaceae	Pinus	Pinus taeda	Pinus taeda L.
2	Pinus virginiana Miller	Pinus virginiana Mill.	5285091	EXACT	100	ACCEPTED	SPECIES	Plantae	Tracheophyta	Pinopsida	Pinales	Pinaceae	Pinus	Pinus virginiana	Pinus virginiana Mill.
2	Stipa avenacea L.	Stipa avenacea L.	8018608	EXACT	100	SYNONYM	SPECIES	Plantae	Tracheophyta	Liliopsida	Poales	Poaceae	Piptochaetium	Piptochaetium avenaceum	Piptochaetium avenaceum (L.) Parodi
2	Heterotheca graminifolia (Michx.) Shinners	Heterotheca graminifolia (Michx.) Shinners	6064676	EXACT	100	SYNONYM	SPECIES	Plantae	Tracheophyta	Magnoliopsida	Asterales	Asteraceae	Pityopsis	Pityopsis graminifolia	Pityopsis graminifolia Nutt.
2	Sibara virginica (L.) Rollins.	Sibara virginica (L.) Rollins	3047320	EXACT	100	SYNONYM	SPECIES	Plantae	Tracheophyta	Magnoliopsida	Brassicales	Brassicaceae	Planodes	Planodes virginicum	Planodes virginicum Greene
2	Plantago aristata Michx.	Plantago aristata Michx.	3189696	EXACT	100	ACCEPTED	SPECIES	Plantae	Tracheophyta	Magnoliopsida	Lamiales	Plantaginaceae	Plantago	Plantago aristata	Plantago aristata Michx.
2	Plantago rugelii Dcne.	Plantago rugelii Decne.	3189781	EXACT	81	ACCEPTED	SPECIES	Plantae	Tracheophyta	Magnoliopsida	Lamiales	Plantaginaceae	Plantago	Plantago rugelii	Plantago rugelii Decne.
2	Plantago virginica L.	Plantago virginica L.	3189751	EXACT	100	ACCEPTED	SPECIES	Plantae	Tracheophyta	Magnoliopsida	Lamiales	Plantaginaceae	Plantago	Plantago virginica	Plantago virginica L.
2	Habenaria ciliaris (L.) R. Brown	Habenaria ciliaris (L.) R.Br.	2798082	EXACT	100	SYNONYM	SPECIES	Plantae	Tracheophyta	Liliopsida	Asparagales	Orchidaceae	Platanthera	Platanthera ciliaris	Platanthera ciliaris Lindl.
2	Platanus occidentalis L.	Platanus occidentalis L.	3152820	EXACT	100	ACCEPTED	SPECIES	Plantae	Tracheophyta	Magnoliopsida	Proteales	Platanaceae	Platanus	Platanus occidentalis	Platanus occidentalis L.
2	Polypodium polypodioides (L.) Watt	Polypodium polypodioides (L.) Watt.	6389739	EXACT	100	SYNONYM	SPECIES	Plantae	Tracheophyta	Polypodiopsida	Polypodiales	Polypodiaceae	Pleopeltis	Pleopeltis polypodioides	Pleopeltis polypodioides (L.) E.G.Andrews & Windham
2	Poa cuspidata Nuttall	Poa cuspidata Nutt.	2704244	EXACT	100	ACCEPTED	SPECIES	Plantae	Tracheophyta	Liliopsida	Poales	Poaceae	Poa	Poa cuspidata	Poa cuspidata Nutt.
2	Podophyllum peltatum L.	Podophyllum peltatum L.	3033839	EXACT	100	ACCEPTED	SPECIES	Plantae	Tracheophyta	Magnoliopsida	Ranunculales	Berberidaceae	Podophyllum	Podophyllum peltatum	Podophyllum peltatum L.
2	Podostemum ceratophyllum Michx.	Podostemum ceratophyllum Michx.	2932949	EXACT	100	ACCEPTED	SPECIES	Plantae	Tracheophyta	Magnoliopsida	Malpighiales	Podostemaceae	Podostemum	Podostemum ceratophyllum	Podostemum ceratophyllum Michx.
2	Polygala curtissii Gray	Polygala curtissii A.Gray	3191384	EXACT	100	ACCEPTED	SPECIES	Plantae	Tracheophyta	Magnoliopsida	Fabales	Polygalaceae	Polygala	Polygala curtissii	Polygala curtissii A.Gray
2	Polygala polygama Walter	Polygala polygama Walter	3191425	EXACT	100	ACCEPTED	SPECIES	Plantae	Tracheophyta	Magnoliopsida	Fabales	Polygalaceae	Polygala	Polygala polygama	Polygala polygama Walter
2	Polygonatum biflorum (Walter) Ell.	Polygonatum biflorum Elliott	2770039	EXACT	100	ACCEPTED	SPECIES	Plantae	Tracheophyta	Liliopsida	Asparagales	Asparagaceae	Polygonatum	Polygonatum biflorum	Polygonatum biflorum Elliott
2	Polypodium virginianum L.	Polypodium virginianum L.	5274950	EXACT	100	ACCEPTED	SPECIES	Plantae	Tracheophyta	Polypodiopsida	Polypodiales	Polypodiaceae	Polypodium	Polypodium virginianum	Polypodium virginianum L.
2	Polypremum procumbens L.	Polypremum procumbens L.	5415472	EXACT	100	ACCEPTED	SPECIES	Plantae	Tracheophyta	Magnoliopsida	Lamiales	Tetrachondraceae	Polypremum	Polypremum procumbens	Polypremum procumbens L.
2	Polystichum acrostichoides (Michx.) Schoot	Polystichum acrostichoides (Michx.) Schott	2651098	EXACT	100	ACCEPTED	SPECIES	Plantae	Tracheophyta	Polypodiopsida	Polypodiales	Dryopteridaceae	Polystichum	Polystichum acrostichoides	Polystichum acrostichoides (Michx.) Schott
2	Populus nigra var. nigra Duroi.	Populus nigra var. nigra	7266798	EXACT	98	ACCEPTED	VARIETY	Plantae	Tracheophyta	Magnoliopsida	Malpighiales	Salicaceae	Populus	Populus nigra	Populus nigra L.
2	Potamogeton diversifolius Raf.	Potamogeton diversifolius Raf.	5301163	EXACT	100	ACCEPTED	SPECIES	Plantae	Tracheophyta	Liliopsida	Alismatales	Potamogetonaceae	Potamogeton	Potamogeton diversifolius	Potamogeton diversifolius Raf.
2	Potentilla canadensis L.	Potentilla canadensis L.	5368951	EXACT	100	ACCEPTED	SPECIES	Plantae	Tracheophyta	Magnoliopsida	Rosales	Rosaceae	Potentilla	Potentilla canadensis	Potentilla canadensis L.
2	Potentila recta L.	Potentilla recta L.	5367294	FUZZY	91	ACCEPTED	SPECIES	Plantae	Tracheophyta	Magnoliopsida	Rosales	Rosaceae	Potentilla	Potentilla recta	Potentilla recta L.
2	Prunella vulgaris L.	Prunella vulgaris L.	5341297	EXACT	100	ACCEPTED	SPECIES	Plantae	Tracheophyta	Magnoliopsida	Lamiales	Lamiaceae	Prunella	Prunella vulgaris	Prunella vulgaris L.
2	Prunus americana Marshall	Prunus americana Marshall	3021106	EXACT	100	ACCEPTED	SPECIES	Plantae	Tracheophyta	Magnoliopsida	Rosales	Rosaceae	Prunus	Prunus americana	Prunus americana Marshall
2	Prunus angustifolia Marshall	Prunus angustifolia Marshall	3021368	EXACT	100	ACCEPTED	SPECIES	Plantae	Tracheophyta	Magnoliopsida	Rosales	Rosaceae	Prunus	Prunus angustifolia	Prunus angustifolia Marshall
2	Prunus persica (L.) Batsch	Prunus persica (L.) Batsch	3022511	EXACT	100	SYNONYM	SPECIES	Plantae	Tracheophyta	Magnoliopsida	Rosales	Rosaceae	Prunus	Prunus persica	Prunus persica Stokes
2	Prunus serotina Ehrhart	Prunus serotina Ehrh.	3021850	EXACT	100	ACCEPTED	SPECIES	Plantae	Tracheophyta	Magnoliopsida	Rosales	Rosaceae	Prunus	Prunus serotina	Prunus serotina Ehrh.
2	Psoralea psoralioides (Walter) Cory var. eglan	Psoralea psoralioides	6372980	HIGHERRANK	97	ACCEPTED	SPECIES	Plantae	Tracheophyta	Magnoliopsida	Fabales	Fabaceae	Psoralea	Psoralea psoralioides	Psoralea psoralioides
2	Pteridium aquilinum (L.) Kuhn	Pteridium aquilinum (L.) Kuhn	5275012	EXACT	100	ACCEPTED	SPECIES	Plantae	Tracheophyta	Polypodiopsida	Polypodiales	Dennstaedtiaceae	Pteridium	Pteridium aquilinum	Pteridium aquilinum (L.) Kuhn
2	Pueraria lobata (Willd.) Ohwi	Pueraria lobata (Willd.) Ohwi	2977654	EXACT	100	SYNONYM	SPECIES	Plantae	Tracheophyta	Magnoliopsida	Fabales	Fabaceae	Pueraria	Pueraria montana	Pueraria montana (Lour.) Merr.
2	Pycnanthemum incanum (L.) Michx.	Pycnanthemum incanum (L.) Michx.	2927354	EXACT	100	ACCEPTED	SPECIES	Plantae	Tracheophyta	Magnoliopsida	Lamiales	Lamiaceae	Pycnanthemum	Pycnanthemum incanum	Pycnanthemum incanum (L.) Michx.
2	Pyrrhopappus carolinianus (Walter) DC.	Pyrrhopappus carolinianus DC.	3145236	EXACT	100	ACCEPTED	SPECIES	Plantae	Tracheophyta	Magnoliopsida	Asterales	Asteraceae	Pyrrhopappus	Pyrrhopappus carolinianus	Pyrrhopappus carolinianus DC.
2	Pyrularia pubera Michx.	Pyrularia pubera Michx.	2889775	EXACT	100	ACCEPTED	SPECIES	Plantae	Tracheophyta	Magnoliopsida	Santalales	Santalaceae	Pyrularia	Pyrularia pubera	Pyrularia pubera Michx.
2	Quercus alba L.	Quercus alba L.	2879737	EXACT	100	ACCEPTED	SPECIES	Plantae	Tracheophyta	Magnoliopsida	Fagales	Fagaceae	Quercus	Quercus alba	Quercus alba L.
2	Quercus coccinea Muenchh.	Quercus coccinea M√ºnchh.	8326061	EXACT	100	ACCEPTED	SPECIES	Plantae	Tracheophyta	Magnoliopsida	Fagales	Fagaceae	Quercus	Quercus coccinea	Quercus coccinea M√ºnchh.
2	Quercus falcata Michx.	Quercus falcata Michx.	2880967	EXACT	100	ACCEPTED	SPECIES	Plantae	Tracheophyta	Magnoliopsida	Fagales	Fagaceae	Quercus	Quercus falcata	Quercus falcata Michx.
2	Quercus marilandica Muenchh.	Quercus marilandica M√ºnchh.	2881630	EXACT	100	ACCEPTED	SPECIES	Plantae	Tracheophyta	Magnoliopsida	Fagales	Fagaceae	Quercus	Quercus marilandica	Quercus marilandica M√ºnchh.
2	Quercus prinus L.	Quercus prinus L.	8401105	EXACT	100	SYNONYM	SPECIES	Plantae	Tracheophyta	Magnoliopsida	Fagales	Fagaceae	Quercus	Quercus michauxii	Quercus michauxii Nutt.
2	Quercus nigra L.	Quercus nigra L.	2879328	EXACT	100	ACCEPTED	SPECIES	Plantae	Tracheophyta	Magnoliopsida	Fagales	Fagaceae	Quercus	Quercus nigra	Quercus nigra L.
2	Quercus rubra L.	Quercus rubra L.	2880539	EXACT	100	ACCEPTED	SPECIES	Plantae	Tracheophyta	Magnoliopsida	Fagales	Fagaceae	Quercus	Quercus rubra	Quercus rubra L.
2	Quercus stellata Wang.	Quercus stellata Wangenh.	8879961	EXACT	100	ACCEPTED	SPECIES	Plantae	Tracheophyta	Magnoliopsida	Fagales	Fagaceae	Quercus	Quercus stellata	Quercus stellata Wangenh.
2	Quercus velutina Lam.	Quercus velutina Lam.	8086561	EXACT	100	ACCEPTED	SPECIES	Plantae	Tracheophyta	Magnoliopsida	Fagales	Fagaceae	Quercus	Quercus velutina	Quercus velutina Lam.
2	Ranunculus recurvatus Poiret	Ranunculus recurvatus Poir.	3033394	EXACT	100	ACCEPTED	SPECIES	Plantae	Tracheophyta	Magnoliopsida	Ranunculales	Ranunculaceae	Ranunculus	Ranunculus recurvatus	Ranunculus recurvatus Poir.
2	Rhexia virginica L.	Rhexia virginica L.	6370198	EXACT	100	ACCEPTED	SPECIES	Plantae	Tracheophyta	Magnoliopsida	Myrtales	Melastomataceae	Rhexia	Rhexia virginica	Rhexia virginica L.
2	Rhododendron arborescens (Pursh) Torrey	Rhododendron arborescens Torr.	2883054	EXACT	100	ACCEPTED	SPECIES	Plantae	Tracheophyta	Magnoliopsida	Ericales	Ericaceae	Rhododendron	Rhododendron arborescens	Rhododendron arborescens Torr.
2	Rhododendron maximum L.	Rhododendron maximum L.	2883094	EXACT	100	ACCEPTED	SPECIES	Plantae	Tracheophyta	Magnoliopsida	Ericales	Ericaceae	Rhododendron	Rhododendron maximum	Rhododendron maximum L.
2	Rhododendron minus Michx.	Rhododendron minus Michx.	2883076	EXACT	100	ACCEPTED	SPECIES	Plantae	Tracheophyta	Magnoliopsida	Ericales	Ericaceae	Rhododendron	Rhododendron minus	Rhododendron minus Michx.
2	Rhododendron nudiflorum (L.) Torrey	Rhododendron nudiflorum (L.) Torr.	2883030	EXACT	100	SYNONYM	SPECIES	Plantae	Tracheophyta	Magnoliopsida	Ericales	Ericaceae	Rhododendron	Rhododendron periclymenoides	Rhododendron periclymenoides (Michx.) Shinners
2	Rhus copallina L.	Rhus copallina L.	3190557	EXACT	100	ACCEPTED	SPECIES	Plantae	Tracheophyta	Magnoliopsida	Sapindales	Anacardiaceae	Rhus	Rhus copallina	Rhus copallina L.
2	Rhus glabra L.	Rhus glabra L.	3190544	EXACT	100	ACCEPTED	SPECIES	Plantae	Tracheophyta	Magnoliopsida	Sapindales	Anacardiaceae	Rhus	Rhus glabra	Rhus glabra L.
2	Rhynchospora chalarocephala Fernald & Gale.	Rhynchospora chalarocephala Fernald & Gale	2721149	EXACT	100	ACCEPTED	SPECIES	Plantae	Tracheophyta	Liliopsida	Poales	Cyperaceae	Rhynchospora	Rhynchospora chalarocephala	Rhynchospora chalarocephala Fernald & Gale
2	Rhynchospora glomerata (L.) Vahl	Rhynchospora glomerata Vahl	2713065	EXACT	100	ACCEPTED	SPECIES	Plantae	Tracheophyta	Liliopsida	Poales	Cyperaceae	Rhynchospora	Rhynchospora glomerata	Rhynchospora glomerata Vahl
2	Robinia hispida L.	Robinia hispida L.	5352221	EXACT	100	ACCEPTED	SPECIES	Plantae	Tracheophyta	Magnoliopsida	Fabales	Fabaceae	Robinia	Robinia hispida	Robinia hispida L.
2	Robinia psuedo-acacia L.	Robinia pseudoacacia L.	5352251	FUZZY	97	ACCEPTED	SPECIES	Plantae	Tracheophyta	Magnoliopsida	Fabales	Fabaceae	Robinia	Robinia pseudoacacia	Robinia pseudoacacia L.
2	Rosa carolina L.	Rosa carolina L.	3006171	EXACT	100	ACCEPTED	SPECIES	Plantae	Tracheophyta	Magnoliopsida	Rosales	Rosaceae	Rosa	Rosa carolina	Rosa carolina L.
2	Rosa wichuriana Crepin	Rosa wichurana Cr	7904955	FUZZY	96	SYNONYM	SPECIES	Plantae	Tracheophyta	Magnoliopsida	Rosales	Rosaceae	Rosa	Rosa luciae	Rosa luciae Franch. & Rochebr.
2	Rubus argutus Link	Rubus argutus Link	2990801	EXACT	100	ACCEPTED	SPECIES	Plantae	Tracheophyta	Magnoliopsida	Rosales	Rosaceae	Rubus	Rubus argutus	Rubus argutus Link
2	Rubus betulifolius Small	Rubus betulifolius Small	2990803	EXACT	100	SYNONYM	SPECIES	Plantae	Tracheophyta	Magnoliopsida	Rosales	Rosaceae	Rubus	Rubus argutus	Rubus argutus Link
2	Rubus flagellaris Willd.	Rubus flagellaris Willd.	2992071	EXACT	100	ACCEPTED	SPECIES	Plantae	Tracheophyta	Magnoliopsida	Rosales	Rosaceae	Rubus	Rubus flagellaris	Rubus flagellaris Willd.
2	Rudbeckia hirta L.	Rudbeckia hirta L.	3114225	EXACT	100	ACCEPTED	SPECIES	Plantae	Tracheophyta	Magnoliopsida	Asterales	Asteraceae	Rudbeckia	Rudbeckia hirta	Rudbeckia hirta L.
2	Rudbeckia laciniata L.	Rudbeckia laciniata L.	3114229	EXACT	100	ACCEPTED	SPECIES	Plantae	Tracheophyta	Magnoliopsida	Asterales	Asteraceae	Rudbeckia	Rudbeckia laciniata	Rudbeckia laciniata L.
2	Ruellia caroliniensis (J.F. Gmel.) Steudel.	Ruellia caroliniensis (J.F.Gmel.) Steud.	5415376	EXACT	100	ACCEPTED	SPECIES	Plantae	Tracheophyta	Magnoliopsida	Lamiales	Acanthaceae	Ruellia	Ruellia caroliniensis	Ruellia caroliniensis (J.F.Gmel.) Steud.
2	Rumex crispus L.	Rumex crispus L.	8195144	EXACT	100	ACCEPTED	SPECIES	Plantae	Tracheophyta	Magnoliopsida	Caryophyllales	Polygonaceae	Rumex	Rumex crispus	Rumex crispus L.
2	Rumex hastatulus Baldwin ex Ell.	Rumex hastatulus Baldwin ex Elliott, 1817	7840099	EXACT	100	DOUBTFUL	SPECIES	Plantae	Tracheophyta	Magnoliopsida	Caryophyllales	Polygonaceae	Rumex	Rumex hastatulus	Rumex hastatulus Baldwin
2	Sebatia angularis (L.) Pursh	Sabatia angularis Pursh	5414514	FUZZY	91	ACCEPTED	SPECIES	Plantae	Tracheophyta	Magnoliopsida	Gentianales	Gentianaceae	Sabatia	Sabatia angularis	Sabatia angularis Pursh
2	Erianthus alopecuroides (L.) EII.	Erianthus alopecuroides (L.) Elliott	5289881	EXACT	88	SYNONYM	SPECIES	Plantae	Tracheophyta	Liliopsida	Poales	Poaceae	Saccharum	Saccharum alopecuroides	Saccharum alopecuroides (L.) Nutt.
2	Sacciolepsis striata (L.) Nash	Sacciolepis striata Nash	2703628	FUZZY	91	ACCEPTED	SPECIES	Plantae	Tracheophyta	Liliopsida	Poales	Poaceae	Sacciolepis	Sacciolepis striata	Sacciolepis striata Nash
2	Sagittaria latifolia var. pubescens (Muhl.) J.G.	Sagittaria latifolia Willd.	5328909	HIGHERRANK	98	ACCEPTED	SPECIES	Plantae	Tracheophyta	Liliopsida	Alismatales	Alismataceae	Sagittaria	Sagittaria latifolia	Sagittaria latifolia Willd.
2	Salix nigra Marshall	Salix nigra Marshall	5372854	EXACT	100	ACCEPTED	SPECIES	Plantae	Tracheophyta	Magnoliopsida	Malpighiales	Salicaceae	Salix	Salix nigra	Salix nigra Marshall
2	Salvia lyrata L.	Salvia lyrata L.	2927027	EXACT	100	ACCEPTED	SPECIES	Plantae	Tracheophyta	Magnoliopsida	Lamiales	Lamiaceae	Salvia	Salvia lyrata	Salvia lyrata L.
2	Sambucus canadensis L.	Sambucus canadensis L.	6369819	EXACT	100	ACCEPTED	SPECIES	Plantae	Tracheophyta	Magnoliopsida	Dipsacales	Adoxaceae	Sambucus	Sambucus canadensis	Sambucus canadensis L.
2	Sanguinaria canadensis L.	Sanguinaria canadensis L.	5334192	EXACT	100	ACCEPTED	SPECIES	Plantae	Tracheophyta	Magnoliopsida	Ranunculales	Papaveraceae	Sanguinaria	Sanguinaria canadensis	Sanguinaria canadensis L.
2	Sanicula canadensis L.	Sanicula canadensis L.	3034834	EXACT	100	ACCEPTED	SPECIES	Plantae	Tracheophyta	Magnoliopsida	Apiales	Apiaceae	Sanicula	Sanicula canadensis	Sanicula canadensis L.
2	Sanicula gregaria Bicknell	Sanicula gregaria Bicknell	3034840	EXACT	100	SYNONYM	SPECIES	Plantae	Tracheophyta	Magnoliopsida	Apiales	Apiaceae	Sanicula	Sanicula odorata	Sanicula odorata (Raf.) K.M.Pryer & L.R.Phillippe
2	Sanicula smalli Bicknell	Sanicula smallii E.P.Bicknell	3034865	FUZZY	99	ACCEPTED	SPECIES	Plantae	Tracheophyta	Magnoliopsida	Apiales	Apiaceae	Sanicula	Sanicula smallii	Sanicula smallii E.P.Bicknell
2	Sassafras albidum (Nuttall) Nees	Sassafras albidum (Nutt.) Nees	3034002	EXACT	100	ACCEPTED	SPECIES	Plantae	Tracheophyta	Magnoliopsida	Laurales	Lauraceae	Sassafras	Sassafras albidum	Sassafras albidum (Nutt.) Nees
2	Botrychium biternatum (Sav.) Underwood	Botrychium biternatum (Sav.) Underw.	2650191	EXACT	100	SYNONYM	SPECIES	Plantae	Tracheophyta	Polypodiopsida	Ophioglossales	Ophioglossaceae	Sceptridium	Sceptridium biternatum	Sceptridium biternatum Lyon
2	Andropogon scoparius Michx.	Andropogon scoparius Michx.	8271955	EXACT	100	SYNONYM	SPECIES	Plantae	Tracheophyta	Liliopsida	Poales	Poaceae	Schizachyrium	Schizachyrium scoparium	Schizachyrium scoparium (Michx.) Nash
2	Scirpus purshianus Fernald	Scirpus purshianus Fernald	2710819	EXACT	100	SYNONYM	SPECIES	Plantae	Tracheophyta	Liliopsida	Poales	Cyperaceae	Schoenoplectiella	Schoenoplectiella purshiana	Schoenoplectiella purshiana (Fernald) Lye
2	Scirpus validus Vahl	Scirpus validus Vahl	7593868	EXACT	100	SYNONYM	SPECIES	Plantae	Tracheophyta	Liliopsida	Poales	Cyperaceae	Schoenoplectus	Schoenoplectus tabernaemontani	Schoenoplectus tabernaemontani (C.C.Gmel.) Palla
2	Schrankia microphylla (Solander ex Smith)	Schrankia microphylla Standl.	7568725	EXACT	96	DOUBTFUL	SPECIES	Plantae	Tracheophyta	Magnoliopsida	Fabales	Fabaceae	Schrankia	Schrankia microphylla	Schrankia microphylla (Dryand.) J.F.Macbr.
2	Scirpus expansus Fern.	Scirpus expansus Fernald	2720257	EXACT	100	ACCEPTED	SPECIES	Plantae	Tracheophyta	Liliopsida	Poales	Cyperaceae	Scirpus	Scirpus expansus	Scirpus expansus Fernald
2	Scirpus poliphyllus Vahl	Scirpus polyphyllus Vahl	2720215	FUZZY	99	ACCEPTED	SPECIES	Plantae	Tracheophyta	Liliopsida	Poales	Cyperaceae	Scirpus	Scirpus polyphyllus	Scirpus polyphyllus Vahl
2	Scleria oligantha Michx.	Scleria oligantha Michx.	2712784	EXACT	100	ACCEPTED	SPECIES	Plantae	Tracheophyta	Liliopsida	Poales	Cyperaceae	Scleria	Scleria oligantha	Scleria oligantha Michx.
2	Festuca arundinaceae Liljebl.	Festuca arundinacea Lilj.	7828497	FUZZY	97	SYNONYM	SPECIES	Plantae	Tracheophyta	Liliopsida	Poales	Poaceae	Scolochloa	Scolochloa festucacea	Scolochloa festucacea Link
2	Scutellaria elliptica Muhl.	Scutellaria elliptica Muhl.	7478502	EXACT	100	ACCEPTED	SPECIES	Plantae	Tracheophyta	Magnoliopsida	Lamiales	Lamiaceae	Scutellaria	Scutellaria elliptica	Scutellaria elliptica Muhl.
2	Coronilla varia L.	Coronilla varia L.	5350005	EXACT	100	SYNONYM	SPECIES	Plantae	Tracheophyta	Magnoliopsida	Fabales	Fabaceae	Securigera	Securigera varia	Securigera varia (L.) Lassen
2	Selaginella apoda (L.) Spring	Selaginella apoda (L.) Spring	2688214	EXACT	100	ACCEPTED	SPECIES	Plantae	Tracheophyta	Lycopodiopsida	Selaginellales	Selaginellaceae	Selaginella	Selaginella apoda	Selaginella apoda (L.) Spring
2	Aster paternus Cronquist	Aster paternus (L.) Cronq.	5385830	EXACT	100	SYNONYM	SPECIES	Plantae	Tracheophyta	Magnoliopsida	Asterales	Asteraceae	Sericocarpus	Sericocarpus asteroides	Sericocarpus asteroides Britton, Sterns & Poggenb.
2	Aster solidagineus Michx.	Aster solidagineus Michx., 1803	7570527	EXACT	100	SYNONYM	SPECIES	Plantae	Tracheophyta	Magnoliopsida	Asterales	Asteraceae	Sericocarpus	Sericocarpus linifolius	Sericocarpus linifolius (L.) B.S.P.
2	Silene virginica L.	Silene virginica L.	5384823	EXACT	100	ACCEPTED	SPECIES	Plantae	Tracheophyta	Magnoliopsida	Caryophyllales	Caryophyllaceae	Silene	Silene virginica	Silene virginica L.
2	Silphium dentatum EII.	Silphium dentatum Ell.	6063447	EXACT	82	SYNONYM	SPECIES	Plantae	Tracheophyta	Magnoliopsida	Asterales	Asteraceae	Silphium	Silphium asteriscus	Silphium asteriscus L.
2	Silphium compositum Michx.	Silphium compositum Michx.	3092567	EXACT	100	ACCEPTED	SPECIES	Plantae	Tracheophyta	Magnoliopsida	Asterales	Asteraceae	Silphium	Silphium compositum	Silphium compositum Michx.
2	Sisyrinchium nashii Bicknell	Sisyrinchium nashii E.P.Bicknell	5296074	EXACT	100	ACCEPTED	SPECIES	Plantae	Tracheophyta	Liliopsida	Asparagales	Iridaceae	Sisyrinchium	Sisyrinchium nashii	Sisyrinchium nashii E.P.Bicknell
2	Polymnia uvedalia L.	Polymnia uvedalia (L.) L.	5404071	EXACT	100	SYNONYM	SPECIES	Plantae	Tracheophyta	Magnoliopsida	Asterales	Asteraceae	Smallanthus	Smallanthus uvedalia	Smallanthus uvedalia (L.) Mack.
2	Smilax ecirrhata var. biltmoreana (Small)	Smilax ecirrhata var. biltmoreana (Small) H.E.Ahles	8621914	EXACT	99	SYNONYM	VARIETY	Plantae	Tracheophyta	Liliopsida	Liliales	Smilacaceae	Smilax	Smilax biltmoreana	Smilax biltmoreana J.B.Norton ex Pennell
2	Smilar bona-nox L.	Smilax bona-nox L.	5295574	FUZZY	91	ACCEPTED	SPECIES	Plantae	Tracheophyta	Liliopsida	Liliales	Smilacaceae	Smilax	Smilax bona-nox	Smilax bona-nox L.
2	Smilax glauca Walter	Smilax glauca Walter	5295374	EXACT	100	ACCEPTED	SPECIES	Plantae	Tracheophyta	Liliopsida	Liliales	Smilacaceae	Smilax	Smilax glauca	Smilax glauca Walter
2	Solanum carolinense L.	Solanum carolinense L.	2932011	EXACT	100	ACCEPTED	SPECIES	Plantae	Tracheophyta	Magnoliopsida	Solanales	Solanaceae	Solanum	Solanum carolinense	Solanum carolinense L.
2	Solidago arguta Aiton	Solidago arguta Ait.	5388878	EXACT	100	ACCEPTED	SPECIES	Plantae	Tracheophyta	Magnoliopsida	Asterales	Asteraceae	Solidago	Solidago arguta	Solidago arguta Ait.
2	Solidago caesia L.	Solidago caesia L.	5389076	EXACT	100	ACCEPTED	SPECIES	Plantae	Tracheophyta	Magnoliopsida	Asterales	Asteraceae	Solidago	Solidago caesia	Solidago caesia L.
2	Solidago erecta Pursh	Solidago erecta Herb.Banks ex Pursh	5388875	EXACT	100	ACCEPTED	SPECIES	Plantae	Tracheophyta	Magnoliopsida	Asterales	Asteraceae	Solidago	Solidago erecta	Solidago erecta Herb.Banks ex Pursh
2	Solidago gigantea Aiton	Solidago gigantea Aiton	5389017	EXACT	100	ACCEPTED	SPECIES	Plantae	Tracheophyta	Magnoliopsida	Asterales	Asteraceae	Solidago	Solidago gigantea	Solidago gigantea Aiton
2	Solidago odora Aiton	Solidago odora Aiton	5388923	EXACT	100	ACCEPTED	SPECIES	Plantae	Tracheophyta	Magnoliopsida	Asterales	Asteraceae	Solidago	Solidago odora	Solidago odora Aiton
2	Solidago petiolaris Aiton	Solidago petiolaris Ait.	5389089	EXACT	100	ACCEPTED	SPECIES	Plantae	Tracheophyta	Magnoliopsida	Asterales	Asteraceae	Solidago	Solidago petiolaris	Solidago petiolaris Ait.
2	Sparganium americanum Nuttall	Sparganium americanum Nutt.	2702311	EXACT	100	ACCEPTED	SPECIES	Plantae	Tracheophyta	Liliopsida	Poales	Typhaceae	Sparganium	Sparganium americanum	Sparganium americanum Nutt.
2	Spigelia marilandica L.	Spigelia marilandica L.	5414398	EXACT	100	ACCEPTED	SPECIES	Plantae	Tracheophyta	Magnoliopsida	Gentianales	Loganiaceae	Spigelia	Spigelia marilandica	Spigelia marilandica L.
2	Spiranthes cernua (L.) Richard	Spiranthes cernua (L.) Rich.	2805420	EXACT	100	ACCEPTED	SPECIES	Plantae	Tracheophyta	Liliopsida	Asparagales	Orchidaceae	Spiranthes	Spiranthes cernua	Spiranthes cernua (L.) Rich.
2	Spiranthes gracilis (Bigelow) Beck	Spiranthes gracilis (Bigelow) L.C.Beck	2805538	EXACT	100	SYNONYM	SPECIES	Plantae	Tracheophyta	Liliopsida	Asparagales	Orchidaceae	Spiranthes	Spiranthes lacera	Spiranthes lacera (Raf.) Raf.
2	Stachys latidens Small	Stachys latidens Small	7400146	EXACT	100	ACCEPTED	SPECIES	Plantae	Tracheophyta	Magnoliopsida	Lamiales	Lamiaceae	Stachys	Stachys latidens	Stachys latidens Small
2	Stellaria pubera Michx.	Stellaria pubera Michx.	5384664	EXACT	100	ACCEPTED	SPECIES	Plantae	Tracheophyta	Magnoliopsida	Caryophyllales	Caryophyllaceae	Stellaria	Stellaria pubera	Stellaria pubera Michx.
2	Stenanthium gramineum (Ker.) Morong.	Stenanthium gramineum Morong	2741746	EXACT	100	ACCEPTED	SPECIES	Plantae	Tracheophyta	Liliopsida	Liliales	Melanthiaceae	Stenanthium	Stenanthium gramineum	Stenanthium gramineum Morong
2	Stewartia ovata (Cav.) Weatherby	Stewartia ovata (Cav.) Weath.	5421085	EXACT	100	ACCEPTED	SPECIES	Plantae	Tracheophyta	Magnoliopsida	Ericales	Theaceae	Stewartia	Stewartia ovata	Stewartia ovata (Cav.) Weath.
2	Strophostyles helvola (L.) Ell.	Strophostyles helvola (L.) Elliott	3912996	EXACT	100	ACCEPTED	SPECIES	Plantae	Tracheophyta	Magnoliopsida	Fabales	Fabaceae	Strophostyles	Strophostyles helvola	Strophostyles helvola (L.) Elliott
2	Stylosanthes biflora (L.) BSP.	Stylosanthes biflora (L.) Britton, Sterns & Poggenb.	2975738	EXACT	89	ACCEPTED	SPECIES	Plantae	Tracheophyta	Magnoliopsida	Fabales	Fabaceae	Stylosanthes	Stylosanthes biflora	Stylosanthes biflora (L.) Britton, Sterns & Poggenb.
2	Styrax grandifolia Aiton	Styrax grandifolium Ait.	5541302	FUZZY	99	ACCEPTED	SPECIES	Plantae	Tracheophyta	Magnoliopsida	Ericales	Styracaceae	Styrax	Styrax grandifolium	Styrax grandifolium Ait.
2	Aster concolor L.	Aster concolor L.	5406345	EXACT	100	SYNONYM	SPECIES	Plantae	Tracheophyta	Magnoliopsida	Asterales	Asteraceae	Symphyotrichum	Symphyotrichum concolor	Symphyotrichum concolor (L.) G.L.Nesom
2	Aster dumosus L.	Aster dumosus L.	5406308	EXACT	100	SYNONYM	SPECIES	Plantae	Tracheophyta	Magnoliopsida	Asterales	Asteraceae	Symphyotrichum	Symphyotrichum dumosum	Symphyotrichum dumosum (L.) G.L.Nesom
2	Aster lateriflorus (L.) Britton	Aster lateriflorus (L.) Britt.	5406366	EXACT	100	SYNONYM	SPECIES	Plantae	Tracheophyta	Magnoliopsida	Asterales	Asteraceae	Symphyotrichum	Symphyotrichum lateriflorum	Symphyotrichum lateriflorum (L.) √Å.L√∂ve & D.L√∂ve
2	Aster patens Aiton.	Aster patens Dryand. ex Ait.	5406504	EXACT	100	SYNONYM	SPECIES	Plantae	Tracheophyta	Magnoliopsida	Asterales	Asteraceae	Symphyotrichum	Symphyotrichum patens	Symphyotrichum patens (Aiton) G.L.Nesom
2	Aster undulatus L.	Aster undulatus L.	5406531	EXACT	100	SYNONYM	SPECIES	Plantae	Tracheophyta	Magnoliopsida	Asterales	Asteraceae	Symphyotrichum	Symphyotrichum undulatum	Symphyotrichum undulatum (L.) G.L.Nesom
2	Symplocos tinctoria (L.) L'Her.	Symplocos tinctoria L'H√©r.	3032999	EXACT	100	ACCEPTED	SPECIES	Plantae	Tracheophyta	Magnoliopsida	Ericales	Symplocaceae	Symplocos	Symplocos tinctoria	Symplocos tinctoria L'H√©r.
2	Taraxacum officinale Wiggers	Taraxacum officinale F.H.Wigg.	5394163	EXACT	100	ACCEPTED	SPECIES	Plantae	Tracheophyta	Magnoliopsida	Asterales	Asteraceae	Taraxacum	Taraxacum officinale	Taraxacum officinale F.H.Wigg.
2	Tephrosia spicata (Walter) T. & G	Tephrosia spicata Torr. & A.Gray	5342199	EXACT	100	ACCEPTED	SPECIES	Plantae	Tracheophyta	Magnoliopsida	Fabales	Fabaceae	Tephrosia	Tephrosia spicata	Tephrosia spicata Torr. & A.Gray
2	Tephrosia virginiana (L.) Persoon	Tephrosia virginiana (L.) Pers.	5342304	EXACT	100	ACCEPTED	SPECIES	Plantae	Tracheophyta	Magnoliopsida	Fabales	Fabaceae	Tephrosia	Tephrosia virginiana	Tephrosia virginiana (L.) Pers.
2	Thalictrum clavatum DC.	Thalictrum clavatum DC.	3033164	EXACT	100	ACCEPTED	SPECIES	Plantae	Tracheophyta	Magnoliopsida	Ranunculales	Ranunculaceae	Thalictrum	Thalictrum clavatum	Thalictrum clavatum DC.
2	Thalictrum macrostylum Small & Heller	Thalictrum macrostylum Small & A.Heller	3033125	EXACT	100	ACCEPTED	SPECIES	Plantae	Tracheophyta	Magnoliopsida	Ranunculales	Ranunculaceae	Thalictrum	Thalictrum macrostylum	Thalictrum macrostylum Small & A.Heller
2	Thalictrum thalictroides (L.) Boivin	Thalictrum thalictroides (L.) Eames & B.Boivin	3033114	EXACT	100	ACCEPTED	SPECIES	Plantae	Tracheophyta	Magnoliopsida	Ranunculales	Ranunculaceae	Thalictrum	Thalictrum thalictroides	Thalictrum thalictroides (L.) Eames & B.Boivin
2	Thaspium trifoliatum (L.) Gray var. flavum	Thaspium trifoliatum var. flavum S.F.Blake	3634631	EXACT	98	SYNONYM	VARIETY	Plantae	Tracheophyta	Magnoliopsida	Apiales	Apiaceae	Thaspium	Thaspium trifoliatum	Thaspium trifoliatum (L.) A.Gray
2	Tiarella cordifolia L.	Tiarella cordifolia L.	5371610	EXACT	100	ACCEPTED	SPECIES	Plantae	Tracheophyta	Magnoliopsida	Saxifragales	Saxifragaceae	Tiarella	Tiarella cordifolia	Tiarella cordifolia L.
2	Tilia heterophylla Vent.	Tilia heterophylla Vent.	6415174	EXACT	100	SYNONYM	SPECIES	Plantae	Tracheophyta	Magnoliopsida	Malvales	Malvaceae	Tilia	Tilia americana	Tilia americana L.
2	Tipularia discolor (Purch) Nuttall	Tipularia discolor (Pursh) Nutt.	5308378	EXACT	100	ACCEPTED	SPECIES	Plantae	Tracheophyta	Liliopsida	Asparagales	Orchidaceae	Tipularia	Tipularia discolor	Tipularia discolor (Pursh) Nutt.
2	Rhus radicans L.	Rhus radicans L.	6427274	EXACT	100	SYNONYM	SPECIES	Plantae	Tracheophyta	Magnoliopsida	Sapindales	Anacardiaceae	Toxicodendron	Toxicodendron radicans	Toxicodendron radicans (L.) Kuntze
2	Tradescantia subaspera Ker.	Tradescantia subaspera Ker Gawl.	2765298	EXACT	83	ACCEPTED	SPECIES	Plantae	Tracheophyta	Liliopsida	Commelinales	Commelinaceae	Tradescantia	Tradescantia subaspera	Tradescantia subaspera Ker Gawl.
2	Trautuetteria carolinensis (Walter) Vail.	Trautvetteria carolinensis (Walt.) Britton ex A.Murr. & Vail	4927062	FUZZY	92	ACCEPTED	SPECIES	Plantae	Tracheophyta	Magnoliopsida	Ranunculales	Ranunculaceae	Trautvetteria	Trautvetteria carolinensis	Trautvetteria carolinensis (Walt.) Britton ex A.Murr. & Vail
2	Trichostema dichotomum L.	Trichostema dichotomum L.	2926665	EXACT	100	ACCEPTED	SPECIES	Plantae	Tracheophyta	Magnoliopsida	Lamiales	Lamiaceae	Trichostema	Trichostema dichotomum	Trichostema dichotomum L.
2	Tridens flavus (L.) Hitchcock	Tridens flavus Hitchc.	5289648	EXACT	100	ACCEPTED	SPECIES	Plantae	Tracheophyta	Liliopsida	Poales	Poaceae	Tridens	Tridens flavus	Tridens flavus Hitchc.
2	Trifolium dubium Sibthorp.	Trifolium dubium Sibth.	5359429	EXACT	100	ACCEPTED	SPECIES	Plantae	Tracheophyta	Magnoliopsida	Fabales	Fabaceae	Trifolium	Trifolium dubium	Trifolium dubium Sibth.
2	Trifolium pratense L.	Trifolium pratense L.	8324121	EXACT	100	ACCEPTED	SPECIES	Plantae	Tracheophyta	Magnoliopsida	Fabales	Fabaceae	Trifolium	Trifolium pratense	Trifolium pratense L.
2	Trifolium repens L.	Trifolium repens L.	5358748	EXACT	100	ACCEPTED	SPECIES	Plantae	Tracheophyta	Magnoliopsida	Fabales	Fabaceae	Trifolium	Trifolium repens	Trifolium repens L.
2	Trilium catesbaei Ell.	Trillium catesbaei Elliott	2742183	FUZZY	91	ACCEPTED	SPECIES	Plantae	Tracheophyta	Liliopsida	Liliales	Melanthiaceae	Trillium	Trillium catesbaei	Trillium catesbaei Elliott
2	Trillium cuneatum Raf.	Trillium cuneatum Raf.	2742247	EXACT	100	ACCEPTED	SPECIES	Plantae	Tracheophyta	Liliopsida	Liliales	Melanthiaceae	Trillium	Trillium cuneatum	Trillium cuneatum Raf.
2	Trillium discolor Wray	Trillium discolor Wray	9616025	EXACT	100	SYNONYM	SPECIES	Plantae	Tracheophyta	Liliopsida	Liliales	Melanthiaceae	Trillium	Trillium discolor	Trillium discolor Wray ex Hook.
2	Trillium cuneatum var. luteum (Muhl.) Ahles	Trillium cuneatum var. luteum (Muhl.) H.E.Ahles	6448902	EXACT	100	SYNONYM	VARIETY	Plantae	Tracheophyta	Liliopsida	Liliales	Melanthiaceae	Trillium	Trillium luteum	Trillium luteum Harbison
2	Trillium erectum var. vaseyi (Harbison) Ahles	Trillium erectum var. vaseyi (Harb.) H.E.Ahles	2742245	EXACT	100	SYNONYM	VARIETY	Plantae	Tracheophyta	Liliopsida	Liliales	Melanthiaceae	Trillium	Trillium vaseyi	Trillium vaseyi Harb.
2	Specularia perfoliata (L.) A. DC.	Specularia perfoliata (L.) A.DC.	3167027	EXACT	100	SYNONYM	SPECIES	Plantae	Tracheophyta	Magnoliopsida	Asterales	Campanulaceae	Triodanis	Triodanis perfoliata	Triodanis perfoliata Nieuwl.
2	Thipsacum dactyloides L.	Tripsacum dactyloides L.	2705536	FUZZY	91	ACCEPTED	SPECIES	Plantae	Tracheophyta	Liliopsida	Poales	Poaceae	Tripsacum	Tripsacum dactyloides	Tripsacum dactyloides L.
2	Triticum aestivum L.	Triticum aestivum L.	7795888	EXACT	100	ACCEPTED	SPECIES	Plantae	Tracheophyta	Liliopsida	Poales	Poaceae	Triticum	Triticum aestivum	Triticum aestivum L.
2	Tsuga canadensis (L.) Carr.	Tsuga canadensis Carri√®re	2687182	EXACT	100	ACCEPTED	SPECIES	Plantae	Tracheophyta	Pinopsida	Pinales	Pinaceae	Tsuga	Tsuga canadensis	Tsuga canadensis Carri√®re
2	Ulmus alata Michx.	Ulmus alata Michx.	5361878	EXACT	100	ACCEPTED	SPECIES	Plantae	Tracheophyta	Magnoliopsida	Rosales	Ulmaceae	Ulmus	Ulmus alata	Ulmus alata Michx.
2	Ulmus rubra Muhl.	Ulmus rubra Muhl.	5361867	EXACT	100	ACCEPTED	SPECIES	Plantae	Tracheophyta	Magnoliopsida	Rosales	Ulmaceae	Ulmus	Ulmus rubra	Ulmus rubra Muhl.
2	Uvularia perfoliata L.	Uvularia perfoliata L.	2740329	EXACT	100	ACCEPTED	SPECIES	Plantae	Tracheophyta	Liliopsida	Liliales	Colchicaceae	Uvularia	Uvularia perfoliata	Uvularia perfoliata L.
2	Vaccinium arboreum Marshall	Vaccinium arboreum Marshall	2882828	EXACT	100	ACCEPTED	SPECIES	Plantae	Tracheophyta	Magnoliopsida	Ericales	Ericaceae	Vaccinium	Vaccinium arboreum	Vaccinium arboreum Marshall
2	Vaccinium pallidum Aiton	Vaccinium pallidum Ait.	2882895	EXACT	100	ACCEPTED	SPECIES	Plantae	Tracheophyta	Magnoliopsida	Ericales	Ericaceae	Vaccinium	Vaccinium pallidum	Vaccinium pallidum Ait.
2	Vaccinium stamineum L.	Vaccinium stamineum L.	2882913	EXACT	100	ACCEPTED	SPECIES	Plantae	Tracheophyta	Magnoliopsida	Ericales	Ericaceae	Vaccinium	Vaccinium stamineum	Vaccinium stamineum L.
2	Trichomanes boschianum Sturm ex. Bosch	Trichomanes boschianum J.W.Sturm ex Bosch	5275191	EXACT	100	SYNONYM	SPECIES	Plantae	Tracheophyta	Polypodiopsida	Hymenophyllales	Hymenophyllaceae	Vandenboschia	Vandenboschia boschiana	Vandenboschia boschiana (J.W.Sturm ex Bosch) Ebihara & K.Iwats.
2	Veratrum parviflorum Michx.	Veratrum parviflorum Michx.	2741812	EXACT	100	ACCEPTED	SPECIES	Plantae	Tracheophyta	Liliopsida	Liliales	Melanthiaceae	Veratrum	Veratrum parviflorum	Veratrum parviflorum Michx.
2	Verbascum thapsus L.	Verbascum thapsus L.	3171949	EXACT	100	ACCEPTED	SPECIES	Plantae	Tracheophyta	Magnoliopsida	Lamiales	Scrophulariaceae	Verbascum	Verbascum thapsus	Verbascum thapsus L.
2	Verbesina alternifolia (L.) Britton ex Kearney	Verbesina alternifolia Britton ex Kearney	3147815	EXACT	100	ACCEPTED	SPECIES	Plantae	Tracheophyta	Magnoliopsida	Asterales	Asteraceae	Verbesina	Verbesina alternifolia	Verbesina alternifolia Britton ex Kearney
2	Verbesina virginica L.	Verbesina virginica L.	3148137	EXACT	100	ACCEPTED	SPECIES	Plantae	Tracheophyta	Magnoliopsida	Asterales	Asteraceae	Verbesina	Verbesina virginica	Verbesina virginica L.
2	Vernonia glauca (L.) Willd.	Vernonia glauca (L.) Willd.	5396749	EXACT	100	ACCEPTED	SPECIES	Plantae	Tracheophyta	Magnoliopsida	Asterales	Asteraceae	Vernonia	Vernonia glauca	Vernonia glauca (L.) Willd.
2	Vernonia noveboracensis (L.) Michx.	Vernonia noveboracensis (L.) Michx.	5397534	EXACT	100	DOUBTFUL	SPECIES	Plantae	Tracheophyta	Magnoliopsida	Asterales	Asteraceae	Vernonia	Vernonia noveboracensis	Vernonia noveboracensis Willd.
2	Veronica arvensis L.	Veronica arvensis L.	3172048	EXACT	100	ACCEPTED	SPECIES	Plantae	Tracheophyta	Magnoliopsida	Lamiales	Plantaginaceae	Veronica	Veronica arvensis	Veronica arvensis L.
2	Veronica officinalis L.	Veronica officinalis L.	3172049	EXACT	100	ACCEPTED	SPECIES	Plantae	Tracheophyta	Magnoliopsida	Lamiales	Plantaginaceae	Veronica	Veronica officinalis	Veronica officinalis L.
2	Viburnum acerifolium L.	Viburnum acerifolium L.	2888596	EXACT	100	ACCEPTED	SPECIES	Plantae	Tracheophyta	Magnoliopsida	Dipsacales	Adoxaceae	Viburnum	Viburnum acerifolium	Viburnum acerifolium L.
2	Viburnum cassinoides L.	Viburnum cassinoides L.	6369862	EXACT	100	SYNONYM	SPECIES	Plantae	Tracheophyta	Magnoliopsida	Dipsacales	Adoxaceae	Viburnum	Viburnum nudum	Viburnum nudum L.
2	Viburnum prunifolium L.	Viburnum prunifolium L.	2888608	EXACT	100	ACCEPTED	SPECIES	Plantae	Tracheophyta	Magnoliopsida	Dipsacales	Adoxaceae	Viburnum	Viburnum prunifolium	Viburnum prunifolium L.
2	Viburnum rufidulum Raf.	Viburnum rufidulum Raf.	2888590	EXACT	100	ACCEPTED	SPECIES	Plantae	Tracheophyta	Magnoliopsida	Dipsacales	Adoxaceae	Viburnum	Viburnum rufidulum	Viburnum rufidulum Raf.
2	Vicia caroliniana Walter	Vicia caroliniana Walter	2975000	EXACT	100	ACCEPTED	SPECIES	Plantae	Tracheophyta	Magnoliopsida	Fabales	Fabaceae	Vicia	Vicia caroliniana	Vicia caroliniana Walter
2	Vicia dasycarpa Tenore	Vicia dasycarpa Ten.	2974922	EXACT	100	SYNONYM	SPECIES	Plantae	Tracheophyta	Magnoliopsida	Fabales	Fabaceae	Vicia	Vicia villosa	Vicia villosa Roth
2	Vigna unguiculata (L.) Walpers	Vigna unguiculata (L.) Walp.	2982583	EXACT	100	ACCEPTED	SPECIES	Plantae	Tracheophyta	Magnoliopsida	Fabales	Fabaceae	Vigna	Vigna unguiculata	Vigna unguiculata (L.) Walp.
2	Vinca minor L.	Vinca minor L.	3169707	EXACT	100	ACCEPTED	SPECIES	Plantae	Tracheophyta	Magnoliopsida	Gentianales	Apocynaceae	Vinca	Vinca minor	Vinca minor L.
2	Viola rafinesquii Greene	Viola rafinesquii Greene	7296411	EXACT	100	SYNONYM	SPECIES	Plantae	Tracheophyta	Magnoliopsida	Malpighiales	Violaceae	Viola	Viola bicolor	Viola bicolor Pursh
2	Viola blanda Willd.	Viola blanda Willd.	5331300	EXACT	100	ACCEPTED	SPECIES	Plantae	Tracheophyta	Magnoliopsida	Malpighiales	Violaceae	Viola	Viola blanda	Viola blanda Willd.
2	Viola canadensis L.	Viola canadensis L.	5331231	EXACT	100	ACCEPTED	SPECIES	Plantae	Tracheophyta	Magnoliopsida	Malpighiales	Violaceae	Viola	Viola canadensis	Viola canadensis L.
2	Viola hastata Michx.	Viola hastata Michx.	5331331	EXACT	100	ACCEPTED	SPECIES	Plantae	Tracheophyta	Magnoliopsida	Malpighiales	Violaceae	Viola	Viola hastata	Viola hastata Michx.
2	Viola conspersa Reichenb.	Viola conspersa Rchb.	5331339	EXACT	100	SYNONYM	SPECIES	Plantae	Tracheophyta	Magnoliopsida	Malpighiales	Violaceae	Viola	Viola labradorica	Viola labradorica Schrank
2	Viola palmata L.	Viola palmata L.	5331370	EXACT	100	ACCEPTED	SPECIES	Plantae	Tracheophyta	Magnoliopsida	Malpighiales	Violaceae	Viola	Viola palmata	Viola palmata L.
2	Viola pedata L.	Viola pedata L.	5331278	EXACT	100	ACCEPTED	SPECIES	Plantae	Tracheophyta	Magnoliopsida	Malpighiales	Violaceae	Viola	Viola pedata	Viola pedata L.
2	Viola primulifolia L.	Viola primulifolia L.	8215820	EXACT	100	ACCEPTED	SPECIES	Plantae	Tracheophyta	Magnoliopsida	Malpighiales	Violaceae	Viola	Viola primulifolia	Viola primulifolia L.
2	Viola rotundifolia Michx.	Viola rotundifolia Michx.	5331203	EXACT	100	ACCEPTED	SPECIES	Plantae	Tracheophyta	Magnoliopsida	Malpighiales	Violaceae	Viola	Viola rotundifolia	Viola rotundifolia Michx.
2	Viola papilionacea Pursh.	Viola papilionacea Pursh	5331250	EXACT	100	SYNONYM	SPECIES	Plantae	Tracheophyta	Magnoliopsida	Malpighiales	Violaceae	Viola	Viola sororia	Viola sororia Willd.
2	Viola sororia Willd.	Viola sororia Willd.	5331238	EXACT	100	ACCEPTED	SPECIES	Plantae	Tracheophyta	Magnoliopsida	Malpighiales	Violaceae	Viola	Viola sororia	Viola sororia Willd.
2	Viola tripartita Ell.	Viola tripartita Elliott	5331304	EXACT	100	ACCEPTED	SPECIES	Plantae	Tracheophyta	Magnoliopsida	Malpighiales	Violaceae	Viola	Viola tripartita	Viola tripartita Elliott
2	Viola walteri House	Viola walteri House	5331182	EXACT	100	ACCEPTED	SPECIES	Plantae	Tracheophyta	Magnoliopsida	Malpighiales	Violaceae	Viola	Viola walteri	Viola walteri House
2	Vitis labrusca L.	Vitis labrusca L.	5372424	EXACT	100	ACCEPTED	SPECIES	Plantae	Tracheophyta	Magnoliopsida	Vitales	Vitaceae	Vitis	Vitis labrusca	Vitis labrusca L.
2	Vitis rotundifolia Michx.	Vitis rotundifolia Michx.	5372394	EXACT	100	ACCEPTED	SPECIES	Plantae	Tracheophyta	Magnoliopsida	Vitales	Vitaceae	Vitis	Vitis rotundifolia	Vitis rotundifolia Michx.
2	Xanthium strumarium L.	Xanthium strumarium L.	3089154	EXACT	100	ACCEPTED	SPECIES	Plantae	Tracheophyta	Magnoliopsida	Asterales	Asteraceae	Xanthium	Xanthium strumarium	Xanthium strumarium L.
2	Xanthorhiza simplicissima Marshall	Xanthorhiza simplicissima Marshall	3033662	EXACT	100	ACCEPTED	SPECIES	Plantae	Tracheophyta	Magnoliopsida	Ranunculales	Ranunculaceae	Xanthorhiza	Xanthorhiza simplicissima	Xanthorhiza simplicissima Marshall
2	Xerophyllum asphodeloides (L.) Nuttall	Xerophyllum asphodeloides Nutt.	5295838	EXACT	100	ACCEPTED	SPECIES	Plantae	Tracheophyta	Liliopsida	Liliales	Melanthiaceae	Xerophyllum	Xerophyllum asphodeloides	Xerophyllum asphodeloides Nutt.
2	Yucca filamentosa var. smalliana (Fernald)	Yucca filamentosa var. smalliana (Fernald) H.E.Ahles	6316620	EXACT	99	SYNONYM	VARIETY	Plantae	Tracheophyta	Liliopsida	Asparagales	Asparagaceae	Yucca	Yucca flaccida	Yucca flaccida Haw.
2	Zizia trifoliata (Michx.) Fernald.	Zizia trifoliata (Michx.) Fernald	3034514	EXACT	100	ACCEPTED	SPECIES	Plantae	Tracheophyta	Magnoliopsida	Apiales	Apiaceae	Zizia	Zizia trifoliata	Zizia trifoliata (Michx.) Fernald
3	Acer rubrum¬†L.	Acer rubrum L.	3189883	EXACT	97	ACCEPTED	SPECIES	Plantae	Tracheophyta	Magnoliopsida	Sapindales	Sapindaceae	Acer	Acer rubrum	Acer rubrum L.
3	Agalinis setacea (Gmel.) Raf.	Agalinis setacea Raf.	3171221	EXACT	100	ACCEPTED	SPECIES	Plantae	Tracheophyta	Magnoliopsida	Lamiales	Orobanchaceae	Agalinis	Agalinis setacea	Agalinis setacea Raf.
3	Ageratina aromatica¬†(L.) Spach	Ageratina aromatica Spach	5400300	EXACT	98	ACCEPTED	SPECIES	Plantae	Tracheophyta	Magnoliopsida	Asterales	Asteraceae	Ageratina	Ageratina aromatica	Ageratina aromatica Spach
3	Agrostis hyemalis (Walt.) BSP.	Agrostis hyemalis (Walter) Britton, Sterns & Poggenb.	2706548	EXACT	89	ACCEPTED	SPECIES	Plantae	Tracheophyta	Liliopsida	Poales	Poaceae	Agrostis	Agrostis hyemalis	Agrostis hyemalis (Walter) Britton, Sterns & Poggenb.
3	Agrostis perennans (Walt.) Tuckerm.	Agrostis perennans (Walter) Tuck.	2706477	EXACT	100	ACCEPTED	SPECIES	Plantae	Tracheophyta	Liliopsida	Poales	Poaceae	Agrostis	Agrostis perennans	Agrostis perennans (Walter) Tuck.
3	Alnus serrulata (Ait.) Wild	Alnus serrata hort.	9201337	FUZZY	92	SYNONYM	SPECIES	Plantae	Tracheophyta	Magnoliopsida	Fagales	Betulaceae	Alnus	Alnus serrulata	Alnus serrulata Willd.
3	Ampelopsis arborea (L.) Koehne	Ampelopsis arborea Koehne	3039184	EXACT	100	ACCEPTED	SPECIES	Plantae	Tracheophyta	Magnoliopsida	Vitales	Vitaceae	Ampelopsis	Ampelopsis arborea	Ampelopsis arborea Koehne
3	Amsonia tabernaemontana¬†Walt.	Amsonia tabernaemontana Walter	3169689	EXACT	98	ACCEPTED	SPECIES	Plantae	Tracheophyta	Magnoliopsida	Gentianales	Apocynaceae	Amsonia	Amsonia tabernaemontana	Amsonia tabernaemontana Walter
3	Woodwardia virginica¬†(L.) Sm.	Woodwardia virginica (L.) Sm.	5275358	EXACT	98	SYNONYM	SPECIES	Plantae	Tracheophyta	Polypodiopsida	Polypodiales	Blechnaceae	Anchistea	Anchistea virginica	Anchistea virginica C.Presl
3	Andropogon gerardii Vitman	Andropogon gerardii Vitman	2706099	EXACT	100	ACCEPTED	SPECIES	Plantae	Tracheophyta	Liliopsida	Poales	Poaceae	Andropogon	Andropogon gerardii	Andropogon gerardii Vitman
3	Andropogon gyrans Ashe.	Andropogon gyrans Ashe	2706106	EXACT	100	ACCEPTED	SPECIES	Plantae	Tracheophyta	Liliopsida	Poales	Poaceae	Andropogon	Andropogon gyrans	Andropogon gyrans Ashe
3	Andropogon ternarius Michx.	Andropogon ternarius Michx.	2706082	EXACT	100	ACCEPTED	SPECIES	Plantae	Tracheophyta	Liliopsida	Poales	Poaceae	Andropogon	Andropogon ternarius	Andropogon ternarius Michx.
3	Andropogon virginicus L. var. virginicus	Andropogon virginicus var. virginicus	6448939	EXACT	98	ACCEPTED	VARIETY	Plantae	Tracheophyta	Liliopsida	Poales	Poaceae	Andropogon	Andropogon virginicus	Andropogon virginicus L.
3	Andropogon virginicus var. glaucus Hack.	Andropogon virginicus var. glaucus Hack.	2706084	EXACT	100	SYNONYM	VARIETY	Plantae	Tracheophyta	Liliopsida	Poales	Poaceae	Andropogon	Andropogon virginicus	Andropogon virginicus L.
3	Anthaenantia villosa (Michx.) Beauv.	Anthaenantia villosa (Michx.) P.Beauv.	2703090	EXACT	100	ACCEPTED	SPECIES	Plantae	Tracheophyta	Liliopsida	Poales	Poaceae	Anthaenantia	Anthaenantia villosa	Anthaenantia villosa (Michx.) P.Beauv.
3	Apios americana Medic.	Apios americana Medik.	2966796	EXACT	100	ACCEPTED	SPECIES	Plantae	Tracheophyta	Magnoliopsida	Fabales	Fabaceae	Apios	Apios americana	Apios americana Medik.
3	Apocynum cannabinum¬†L.	Apocynum cannabinum L.	3169790	EXACT	98	ACCEPTED	SPECIES	Plantae	Tracheophyta	Magnoliopsida	Gentianales	Apocynaceae	Apocynum	Apocynum cannabinum	Apocynum cannabinum L.
3	Arabidopsis thaliana (L.) Heynhold	Arabidopsis thaliana (L.) Heynh.	3052436	EXACT	100	ACCEPTED	SPECIES	Plantae	Tracheophyta	Magnoliopsida	Brassicales	Brassicaceae	Arabidopsis	Arabidopsis thaliana	Arabidopsis thaliana (L.) Heynh.
3	Aralia spinosa¬†L.	Aralia spinosa L.	3036972	EXACT	98	ACCEPTED	SPECIES	Plantae	Tracheophyta	Magnoliopsida	Apiales	Araliaceae	Aralia	Aralia spinosa	Aralia spinosa L.
3	Aristida stricta Michx.	Aristida stricta Michx.	2706263	EXACT	100	ACCEPTED	SPECIES	Plantae	Tracheophyta	Liliopsida	Poales	Poaceae	Aristida	Aristida stricta	Aristida stricta Michx.
3	Aronia arbutifolia (L.) Ell.	Aronia arbutifolia (L.) Elliott	7830996	EXACT	100	SYNONYM	SPECIES	Plantae	Tracheophyta	Magnoliopsida	Rosales	Rosaceae	Aronia	Aronia arbutifolia	Aronia arbutifolia (L.) Pers.
3	Arundinaria gigantia (Walt.) Muhl.	Arundinaria gigantea (Walter) Muhl.	2705964	FUZZY	99	ACCEPTED	SPECIES	Plantae	Tracheophyta	Liliopsida	Poales	Poaceae	Arundinaria	Arundinaria gigantea	Arundinaria gigantea (Walter) Muhl.
3	Asclepias amplexicaulis Sm.	Asclepias amplexicaulis Sm.	3170332	EXACT	100	ACCEPTED	SPECIES	Plantae	Tracheophyta	Magnoliopsida	Gentianales	Apocynaceae	Asclepias	Asclepias amplexicaulis	Asclepias amplexicaulis Sm.
3	Asclepias humistrata¬†Walt.	Asclepias humistrata Walter	3170319	EXACT	98	ACCEPTED	SPECIES	Plantae	Tracheophyta	Magnoliopsida	Gentianales	Apocynaceae	Asclepias	Asclepias humistrata	Asclepias humistrata Walter
3	Asclepias ovalifolia Decne.	Asclepias ovalifolia Decne.	3170264	EXACT	100	ACCEPTED	SPECIES	Plantae	Tracheophyta	Magnoliopsida	Gentianales	Apocynaceae	Asclepias	Asclepias ovalifolia	Asclepias ovalifolia Decne.
3	Asclepias tuberosa¬†L.	Asclepias tuberosa L.	3170305	EXACT	97	ACCEPTED	SPECIES	Plantae	Tracheophyta	Magnoliopsida	Gentianales	Apocynaceae	Asclepias	Asclepias tuberosa	Asclepias tuberosa L.
3	Asclepias verticillata¬†L.	Asclepias verticillata L.	3170235	EXACT	98	ACCEPTED	SPECIES	Plantae	Tracheophyta	Magnoliopsida	Gentianales	Apocynaceae	Asclepias	Asclepias verticillata	Asclepias verticillata L.
3	Asimina incana¬†(W. Bartram) Exell	Asimina incana (W.Bartram) Exell	3158024	EXACT	98	SYNONYM	SPECIES	Plantae	Tracheophyta	Magnoliopsida	Magnoliales	Annonaceae	Asimina	Asimina speciosa	Asimina speciosa Nash
3	Asplenium platyneuron (L.) Britton, Sterns & Poggenb	Asplenium platyneuron (L.) Britton, Sterns & Poggenb.	2650714	EXACT	100	ACCEPTED	SPECIES	Plantae	Tracheophyta	Polypodiopsida	Polypodiales	Aspleniaceae	Asplenium	Asplenium platyneuron	Asplenium platyneuron (L.) Britton, Sterns & Poggenb.
3	Astragalus michauxii (Kuntze) Hermann.	Astragalus michauxii (Kuntze) F.J.Herm.	5345882	EXACT	100	ACCEPTED	SPECIES	Plantae	Tracheophyta	Magnoliopsida	Fabales	Fabaceae	Astragalus	Astragalus michauxii	Astragalus michauxii (Kuntze) F.J.Herm.
3	Aureolaria pedicularia (L.) Raf.	Aureolaria pedicularia (Linnaeus) Rafinesque	8286881	EXACT	100	SYNONYM	SPECIES	Plantae	Tracheophyta	Magnoliopsida	Lamiales	Orobanchaceae	Aureolaria	Aureolaria pedicularia	Aureolaria pedicularia (L.) Raf. ex Pennell
3	Azolla pinnata¬†R. Br.	Azolla pinnata R.Br.	2650106	EXACT	98	ACCEPTED	SPECIES	Plantae	Tracheophyta	Polypodiopsida	Salviniales	Salviniaceae	Azolla	Azolla pinnata	Azolla pinnata R.Br.
3	Baccharis halimifolia¬†L.	Baccharis halimifolia L.	3129663	EXACT	97	ACCEPTED	SPECIES	Plantae	Tracheophyta	Magnoliopsida	Asterales	Asteraceae	Baccharis	Baccharis halimifolia	Baccharis halimifolia L.
3	Balduina angustifolia (Pursh) B.L. Rob.	Balduina angustifolia B.L.Rob.	3104988	EXACT	100	ACCEPTED	SPECIES	Plantae	Tracheophyta	Magnoliopsida	Asterales	Asteraceae	Balduina	Balduina angustifolia	Balduina angustifolia B.L.Rob.
3	Balduina uniflora¬†Nutt.	Balduina uniflora Nutt.	3104992	EXACT	98	ACCEPTED	SPECIES	Plantae	Tracheophyta	Magnoliopsida	Asterales	Asteraceae	Balduina	Balduina uniflora	Balduina uniflora Nutt.
3	Baptisia lanceolata (Walt.) Ell.	Baptisia lanceolata (Walter) Elliott	2976122	EXACT	100	ACCEPTED	SPECIES	Plantae	Tracheophyta	Magnoliopsida	Fabales	Fabaceae	Baptisia	Baptisia lanceolata	Baptisia lanceolata (Walter) Elliott
3	Baptisia perfoliata (L.) R. Brown.	Baptisia perfoliata (L.) R.Br.	2976109	EXACT	100	ACCEPTED	SPECIES	Plantae	Tracheophyta	Magnoliopsida	Fabales	Fabaceae	Baptisia	Baptisia perfoliata	Baptisia perfoliata (L.) R.Br.
3	Berchemia scandens (Hill) K. Koch.	Berchemia scandens (Hill) K.Koch	3039506	EXACT	100	ACCEPTED	SPECIES	Plantae	Tracheophyta	Magnoliopsida	Rosales	Rhamnaceae	Berchemia	Berchemia scandens	Berchemia scandens (Hill) K.Koch
3	Bidens bipinnata¬†L.	Bidens bipinnata L.	5389402	EXACT	97	ACCEPTED	SPECIES	Plantae	Tracheophyta	Magnoliopsida	Asterales	Asteraceae	Bidens	Bidens bipinnata	Bidens bipinnata L.
3	Bignonia capreolata L.	Bignonia capreolata L.	3172516	EXACT	100	ACCEPTED	SPECIES	Plantae	Tracheophyta	Magnoliopsida	Lamiales	Bignoniaceae	Bignonia	Bignonia capreolata	Bignonia capreolata L.
3	Boehmeria cylindrica (L.) Sw.	Boehmeria cylindrica (L.) Sw.	2984345	EXACT	100	ACCEPTED	SPECIES	Plantae	Tracheophyta	Magnoliopsida	Rosales	Urticaceae	Boehmeria	Boehmeria cylindrica	Boehmeria cylindrica (L.) Sw.
3	Brasenia schreberi Gmel.	Brasenia schreberi J.F.Gmel.	2882446	EXACT	100	ACCEPTED	SPECIES	Plantae	Tracheophyta	Magnoliopsida	Nymphaeales	Cabombaceae	Brasenia	Brasenia schreberi	Brasenia schreberi J.F.Gmel.
3	Bulbostylis warei (Torr.) Clarke	Bulbostylis warei C.B.Clarke	5292204	EXACT	100	ACCEPTED	SPECIES	Plantae	Tracheophyta	Liliopsida	Poales	Cyperaceae	Bulbostylis	Bulbostylis warei	Bulbostylis warei C.B.Clarke
3	Cabomba caroliniana Gray	Cabomba caroliniana A.Gray	2882443	EXACT	100	ACCEPTED	SPECIES	Plantae	Tracheophyta	Magnoliopsida	Nymphaeales	Cabombaceae	Cabomba	Cabomba caroliniana	Cabomba caroliniana A.Gray
3	Callicarpa americana L.	Callicarpa americana L.	5341129	EXACT	100	ACCEPTED	SPECIES	Plantae	Tracheophyta	Magnoliopsida	Lamiales	Lamiaceae	Callicarpa	Callicarpa americana	Callicarpa americana L.
3	Cuthbertia rosea (Vent.) Small	Cuthbertia rosea (Vent.) Small	2763746	EXACT	100	SYNONYM	SPECIES	Plantae	Tracheophyta	Liliopsida	Commelinales	Commelinaceae	Callisia	Callisia rosea	Callisia rosea (Vent.) D.R.Hunt
3	Campsis radicans (L.) Seem. ex Bureau	Campsis radicans (L.) Bureau	3172549	EXACT	100	SYNONYM	SPECIES	Plantae	Tracheophyta	Magnoliopsida	Lamiales	Bignoniaceae	Campsis	Campsis radicans	Campsis radicans (L.) Seem.
3	Carex albolutescens Schw.	Carex albolutescens Schwein.	2723628	EXACT	100	ACCEPTED	SPECIES	Plantae	Tracheophyta	Liliopsida	Poales	Cyperaceae	Carex	Carex albolutescens	Carex albolutescens Schwein.
3	Carex debilis Michx.	Carex debilis Michx.	2724457	EXACT	100	ACCEPTED	SPECIES	Plantae	Tracheophyta	Liliopsida	Poales	Cyperaceae	Carex	Carex debilis	Carex debilis Michx.
3	Carex folliculata L.	Carex folliculata L.	2722527	EXACT	100	ACCEPTED	SPECIES	Plantae	Tracheophyta	Liliopsida	Poales	Cyperaceae	Carex	Carex folliculata	Carex folliculata L.
3	Carex glaucescens Ell.	Carex glaucescens Elliott	2725264	EXACT	100	ACCEPTED	SPECIES	Plantae	Tracheophyta	Liliopsida	Poales	Cyperaceae	Carex	Carex glaucescens	Carex glaucescens Elliott
3	Carphephorus odoratissimus¬†(J.F. Gmel.) Herb.	Carphephorus odoratissimus (J.F.Gmel.) Hebert	7795803	EXACT	97	ACCEPTED	SPECIES	Plantae	Tracheophyta	Magnoliopsida	Asterales	Asteraceae	Carphephorus	Carphephorus odoratissimus	Carphephorus odoratissimus (J.F.Gmel.) Hebert
3	Osmanthus americanus (L.) Benth. & Hook F. ex Gray	Osmanthus americanus (L.) A.Gray	8076138	EXACT	100	SYNONYM	SPECIES	Plantae	Tracheophyta	Magnoliopsida	Lamiales	Oleaceae	Cartrema	Cartrema americana	Cartrema americana (L.) G.L.Nesom
3	Carya illinoensis (Wang.) K. Koch	Carya illinoensis (Wangenh.) K.Koch, 1869	4205617	EXACT	100	SYNONYM	SPECIES	Plantae	Tracheophyta	Magnoliopsida	Fagales	Juglandaceae	Carya	Carya illinoiensis	Carya illinoiensis (Wangenh.) K.Koch
3	Catalpa bignonioides Walt.	Catalpa bignonioides Walter	3172615	EXACT	100	ACCEPTED	SPECIES	Plantae	Tracheophyta	Magnoliopsida	Lamiales	Bignoniaceae	Catalpa	Catalpa bignonioides	Catalpa bignonioides Walter
3	Cenchrus longispinus (Hack.) .	Cenchrus L.	2703201	HIGHERRANK	94	ACCEPTED	GENUS	Plantae	Tracheophyta	Liliopsida	Poales	Poaceae	Cenchrus	Cenchrus longispinus	Cenchrus longispinus (Hack. ex Kneucker) Fernald
3	Centella asiatica¬†(L.) Urb.	Centella asiatica (L.) Urb.	3034128	EXACT	98	ACCEPTED	SPECIES	Plantae	Tracheophyta	Magnoliopsida	Apiales	Apiaceae	Centella	Centella asiatica	Centella asiatica (L.) Urb.
3	Centrosema virginianum (L.) Benth.	Centrosema virginianum (L.) Benth.	2964906	EXACT	100	ACCEPTED	SPECIES	Plantae	Tracheophyta	Magnoliopsida	Fabales	Fabaceae	Centrosema	Centrosema virginianum	Centrosema virginianum (L.) Benth.
3	Cephalanthus occidentalis L.	Cephalanthus occidentalis L.	2923947	EXACT	100	ACCEPTED	SPECIES	Plantae	Tracheophyta	Magnoliopsida	Gentianales	Rubiaceae	Cephalanthus	Cephalanthus occidentalis	Cephalanthus occidentalis L.
3	Cerastium glomeratum Thuill.	Cerastium glomeratum Thuill.	3085440	EXACT	100	ACCEPTED	SPECIES	Plantae	Tracheophyta	Magnoliopsida	Caryophyllales	Caryophyllaceae	Cerastium	Cerastium glomeratum	Cerastium glomeratum Thuill.
3	Ceratiola ericoides Michx.	Ceratiola ericoides Michx.	2888365	EXACT	100	ACCEPTED	SPECIES	Plantae	Tracheophyta	Magnoliopsida	Ericales	Ericaceae	Ceratiola	Ceratiola ericoides	Ceratiola ericoides Michx.
3	Cercis canadensis L.	Cercis canadensis L.	5353583	EXACT	100	ACCEPTED	SPECIES	Plantae	Tracheophyta	Magnoliopsida	Fabales	Fabaceae	Cercis	Cercis canadensis	Cercis canadensis L.
3	Cassia fasciculata Michx.	Cassia fasciculata Michx.	5351287	EXACT	100	SYNONYM	SPECIES	Plantae	Tracheophyta	Magnoliopsida	Fabales	Fabaceae	Chamaecrista	Chamaecrista fasciculata	Chamaecrista fasciculata (Michx.) Greene
3	Chionanthus virginicus L.	Chionanthus virginicus L.	3172303	EXACT	100	ACCEPTED	SPECIES	Plantae	Tracheophyta	Magnoliopsida	Lamiales	Oleaceae	Chionanthus	Chionanthus virginicus	Chionanthus virginicus L.
3	Cirsium repandum¬†Michx.	Cirsium repandum Michx.	3113685	EXACT	98	ACCEPTED	SPECIES	Plantae	Tracheophyta	Magnoliopsida	Asterales	Asteraceae	Cirsium	Cirsium repandum	Cirsium repandum Michx.
3	Clethra alnifolia¬†L.	Clethra alnifolia L.	2888323	EXACT	98	ACCEPTED	SPECIES	Plantae	Tracheophyta	Magnoliopsida	Ericales	Clethraceae	Clethra	Clethra alnifolia	Clethra alnifolia L.
3	Cliftonia monophylla (Lam.) Britt. ex Sarg.	Cliftonia monophylla (Lam.) Britt. ex Sarg.	5333450	EXACT	100	ACCEPTED	SPECIES	Plantae	Tracheophyta	Magnoliopsida	Ericales	Cyrillaceae	Cliftonia	Cliftonia monophylla	Cliftonia monophylla (Lam.) Britt. ex Sarg.
3	Calamintha coccinea (Nutt.) Benth.	Calamintha coccinea (Nutt. ex Hook.) Benth.	5341428	EXACT	99	SYNONYM	SPECIES	Plantae	Tracheophyta	Magnoliopsida	Lamiales	Lamiaceae	Clinopodium	Clinopodium coccineum	Clinopodium coccineum Kuntze
3	Clitoria mariana L.	Clitoria mariana L.	2946542	EXACT	100	ACCEPTED	SPECIES	Plantae	Tracheophyta	Magnoliopsida	Fabales	Fabaceae	Clitoria	Clitoria mariana	Clitoria mariana L.
3	Cnidoscolus stimulosus (Michx.) Engelm.	Cnidoscolus stimulosus (Michx.) Engelm. & A.Gray	3073687	EXACT	100	SYNONYM	SPECIES	Plantae	Tracheophyta	Magnoliopsida	Malpighiales	Euphorbiaceae	Cnidoscolus	Cnidoscolus urens	Cnidoscolus urens Arthur
3	Panicum anceps Michx.	Panicum anceps Michx.	2705070	EXACT	100	SYNONYM	SPECIES	Plantae	Tracheophyta	Liliopsida	Poales	Poaceae	Coleataenia	Coleataenia anceps	Coleataenia anceps (Michx.) Soreng
3	Panicum rigidulum Bose ex Nees	Panicum rigidulum Bosc ex Nees	2705137	EXACT	100	SYNONYM	SPECIES	Plantae	Tracheophyta	Liliopsida	Poales	Poaceae	Coleataenia	Coleataenia rigidula	Coleataenia rigidula (Bosc ex Nees) LeBlond
3	Panicum tenerium Beyr. Trin.	Panicum tenerum Beyr. ex Trin.	2705101	FUZZY	97	SYNONYM	SPECIES	Plantae	Tracheophyta	Liliopsida	Poales	Poaceae	Coleataenia	Coleataenia tenera	Coleataenia tenera (Beyr. ex Trin.) Soreng
3	Commelina erecta L.	Commelina erecta L.	2764389	EXACT	100	ACCEPTED	SPECIES	Plantae	Tracheophyta	Liliopsida	Commelinales	Commelinaceae	Commelina	Commelina erecta	Commelina erecta L.
3	Coreopsis auriculata¬†L.	Coreopsis auriculata L.	3133965	EXACT	97	ACCEPTED	SPECIES	Plantae	Tracheophyta	Magnoliopsida	Asterales	Asteraceae	Coreopsis	Coreopsis auriculata	Coreopsis auriculata L.
3	Cornus florida L.	Cornus florida L.	3082240	EXACT	100	ACCEPTED	SPECIES	Plantae	Tracheophyta	Magnoliopsida	Cornales	Cornaceae	Cornus	Cornus florida	Cornus florida L.
3	Crataegus uniflora Muenchh.	Crataegus uniflora M√ºnchh.	3015389	EXACT	100	ACCEPTED	SPECIES	Plantae	Tracheophyta	Magnoliopsida	Rosales	Rosaceae	Crataegus	Crataegus uniflora	Crataegus uniflora M√ºnchh.
3	Haplopappus divaricatus (Nutt.) A. Gray	Haplopappus Cass.	3100380	EXACT	94	ACCEPTED	GENUS	Plantae	Tracheophyta	Magnoliopsida	Asterales	Asteraceae	Haplopappus	Croptilon divaricatum	Croptilon divaricatum (Nutt.) Raf.
3	Croton argyranthemus Michx.	Croton argyranthemus Michx.	3060257	EXACT	100	ACCEPTED	SPECIES	Plantae	Tracheophyta	Magnoliopsida	Malpighiales	Euphorbiaceae	Croton	Croton argyranthemus	Croton argyranthemus Michx.
3	Cynodon dactylon (L.) Pers.	Cynodon dactylon (L.) Pers.	6109637	EXACT	100	ACCEPTED	SPECIES	Plantae	Tracheophyta	Liliopsida	Poales	Poaceae	Cynodon	Cynodon dactylon	Cynodon dactylon (L.) Pers.
3	Cyperus globulosus Aubl.	Cyperus globulosus Aubl.	2714694	EXACT	100	SYNONYM	SPECIES	Plantae	Tracheophyta	Liliopsida	Poales	Cyperaceae	Cyperus	Cyperus luzulae	Cyperus luzulae (L.) Retz.
3	Cyrilla racemiflora L.	Cyrilla racemiflora L.	5333448	EXACT	100	ACCEPTED	SPECIES	Plantae	Tracheophyta	Magnoliopsida	Ericales	Cyrillaceae	Cyrilla	Cyrilla racemiflora	Cyrilla racemiflora L.
3	Citisus fragrans Lam.	Cytisus fragrans Lam.	5354589	FUZZY	91	SYNONYM	SPECIES	Plantae	Tracheophyta	Magnoliopsida	Fabales	Fabaceae	Cytisus	Cytisus supranubius	Cytisus supranubius Kuntze
3	Dalea pinnata (Gmel.) Bameby	Dalea pinnata (J.F.Gmel.) Barneby	5353205	EXACT	89	ACCEPTED	SPECIES	Plantae	Tracheophyta	Magnoliopsida	Fabales	Fabaceae	Dalea	Dalea pinnata	Dalea pinnata (J.F.Gmel.) Barneby
3	Danthonia sericea Nutt. var. sericea	Danthonia sericea var. sericea	6068914	EXACT	98	SYNONYM	VARIETY	Plantae	Tracheophyta	Liliopsida	Poales	Poaceae	Danthonia	Danthonia sericea	Danthonia sericea Nutt.
3	Daucus pusillus¬†Michx.	Daucus pusillus Michx.	3034741	EXACT	98	ACCEPTED	SPECIES	Plantae	Tracheophyta	Magnoliopsida	Apiales	Apiaceae	Daucus	Daucus pusillus	Daucus pusillus Michx.
3	Desmodium glutinosum (Muhl. ex Wild.) Wood	Desmodium glutinosum (Muhl. ex Willd.) A.Wood	2967416	EXACT	100	ACCEPTED	SPECIES	Plantae	Tracheophyta	Magnoliopsida	Fabales	Fabaceae	Desmodium	Desmodium glutinosum	Desmodium glutinosum (Muhl. ex Willd.) A.Wood
3	Desmodium tortuosum (Sw.) DC.	Desmodium tortuosum (Sw.) DC.	2967221	EXACT	100	ACCEPTED	SPECIES	Plantae	Tracheophyta	Magnoliopsida	Fabales	Fabaceae	Desmodium	Desmodium tortuosum	Desmodium tortuosum (Sw.) DC.
3	Desmodium viridiflorum (L.) DC.	Desmodium viridiflorum DC.	2967608	EXACT	100	ACCEPTED	SPECIES	Plantae	Tracheophyta	Magnoliopsida	Fabales	Fabaceae	Desmodium	Desmodium viridiflorum	Desmodium viridiflorum DC.
3	Digitaria ciliaris (Retz.) Koel.	Digitaria ciliaris (Retz.) Koeler	5289998	EXACT	100	ACCEPTED	SPECIES	Plantae	Tracheophyta	Liliopsida	Poales	Poaceae	Digitaria	Digitaria ciliaris	Digitaria ciliaris (Retz.) Koeler
3	Leptoloma cognatum (Schult.) Chase	Leptoloma cognata (Schult.) Chase	5676547	FUZZY	99	SYNONYM	SPECIES	Plantae	Tracheophyta	Liliopsida	Poales	Poaceae	Digitaria	Digitaria cognata	Digitaria cognata (Schult.) Pilg.
3	Diodia virginiana L.	Diodia virginiana L.	2908579	EXACT	100	ACCEPTED	SPECIES	Plantae	Tracheophyta	Magnoliopsida	Gentianales	Rubiaceae	Diodia	Diodia virginiana	Diodia virginiana L.
3	Diospyros virginiana L.	Diospyros virginiana L.	3032986	EXACT	100	ACCEPTED	SPECIES	Plantae	Tracheophyta	Magnoliopsida	Ericales	Ebenaceae	Diospyros	Diospyros virginiana	Diospyros virginiana L.
3	Dyschoriste humistrata (Michx.) Kuntze	Dyschoriste Nees	3173054	EXACT	94	ACCEPTED	GENUS	Plantae	Tracheophyta	Magnoliopsida	Lamiales	Acanthaceae	Dyschoriste	Dyschoriste humistrata	Dyschoriste humistrata Kuntze
3	Dysphania ambrosioides (L.)	Dysphania ambrosioides (L.) Mosyakin & Clemants	5568446	EXACT	99	ACCEPTED	SPECIES	Plantae	Tracheophyta	Magnoliopsida	Caryophyllales	Amaranthaceae	Dysphania	Dysphania ambrosioides	Dysphania ambrosioides (L.) Mosyakin & Clemants
3	Erigeron annuus¬†(L.) Pers.	Erigeron annuus Pers.	3117449	EXACT	97	ACCEPTED	SPECIES	Plantae	Tracheophyta	Magnoliopsida	Asterales	Asteraceae	Erigeron	Erigeron annuus	Erigeron annuus Pers.
3	Conyza canadensis var. pusilla¬†(Nutt.) Cronq.	Conyza canadensis var. pusilla (Nutt.) Cronquist	5692851	EXACT	98	SYNONYM	VARIETY	Plantae	Tracheophyta	Magnoliopsida	Asterales	Asteraceae	Erigeron	Erigeron canadensis	Erigeron canadensis L.
3	Erigeron strigosus¬†Muhl.¬†ex.¬†Willd.	Erigeron strigosus Muhl. ex Willd.	3146632	EXACT	97	ACCEPTED	SPECIES	Plantae	Tracheophyta	Magnoliopsida	Asterales	Asteraceae	Erigeron	Erigeron strigosus	Erigeron strigosus Muhl. ex Willd.
3	Erigeron vernus¬†(L.) Torr. & A. Gray	Erigeron vernus Torr. & A.Gray	3146922	EXACT	98	ACCEPTED	SPECIES	Plantae	Tracheophyta	Magnoliopsida	Asterales	Asteraceae	Erigeron	Erigeron vernus	Erigeron vernus Torr. & A.Gray
3	Eriocaulon decangulare L.	Eriocaulon decangulare L.	2690647	EXACT	100	ACCEPTED	SPECIES	Plantae	Tracheophyta	Liliopsida	Poales	Eriocaulaceae	Eriocaulon	Eriocaulon decangulare	Eriocaulon decangulare L.
3	Eriogonum tomentosum Michx.	Eriogonum tomentosum Michx.	2889645	EXACT	100	ACCEPTED	SPECIES	Plantae	Tracheophyta	Magnoliopsida	Caryophyllales	Polygonaceae	Eriogonum	Eriogonum tomentosum	Eriogonum tomentosum Michx.
3	Leucothoe racemosa (L.) Gray	Leucothoe racemosa (L.) Gray	5333363	EXACT	100	SYNONYM	SPECIES	Plantae	Tracheophyta	Magnoliopsida	Ericales	Ericaceae	Eubotrys	Eubotrys racemosa	Eubotrys racemosa Nutt.
3	Eupatorium capillifolium¬†(Lam.) Small	Eupatorium capillifolium Small.	5403126	EXACT	97	ACCEPTED	SPECIES	Plantae	Tracheophyta	Magnoliopsida	Asterales	Asteraceae	Eupatorium	Eupatorium capillifolium	Eupatorium capillifolium Small.
3	Eupatorium compositifolium¬†Walt.	Eupatorium compositifolium Walter	5403000	EXACT	98	ACCEPTED	SPECIES	Plantae	Tracheophyta	Magnoliopsida	Asterales	Asteraceae	Eupatorium	Eupatorium compositifolium	Eupatorium compositifolium Walter
3	Eupatorium hyssopifolium¬†L.	Eupatorium hyssopifolium L.	5403057	EXACT	98	ACCEPTED	SPECIES	Plantae	Tracheophyta	Magnoliopsida	Asterales	Asteraceae	Eupatorium	Eupatorium hyssopifolium	Eupatorium hyssopifolium L.
3	Eupatorium cuneifolium Willd.	Eupatorium cuneifolium Willd.	7386637	EXACT	100	SYNONYM	SPECIES	Plantae	Tracheophyta	Magnoliopsida	Asterales	Asteraceae	Eupatorium	Eupatorium linearifolium	Eupatorium linearifolium Walter
3	Euphorbia gracilior Cronq.	Euphorbia gracilior Cronquist	3064953	EXACT	100	ACCEPTED	SPECIES	Plantae	Tracheophyta	Magnoliopsida	Malpighiales	Euphorbiaceae	Euphorbia	Euphorbia gracilior	Euphorbia gracilior Cronquist
3	Euphorbia heterophylla L. var. heterophylla	Euphorbia heterophylla var. heterophylla	8373587	EXACT	98	ACCEPTED	VARIETY	Plantae	Tracheophyta	Magnoliopsida	Malpighiales	Euphorbiaceae	Euphorbia	Euphorbia heterophylla	Euphorbia heterophylla L.
3	Euthamia minor¬†(Michx.) Greene	Euthamia minor (Michx.) Greene	3092785	EXACT	98	SYNONYM	SPECIES	Plantae	Tracheophyta	Magnoliopsida	Asterales	Asteraceae	Euthamia	Euthamia caroliniana	Euthamia caroliniana (L.) Greene ex Porter & Britton
3	Fraxinus caroliniana Mill.	Fraxinus caroliniana Mill.	3172339	EXACT	100	ACCEPTED	SPECIES	Plantae	Tracheophyta	Magnoliopsida	Lamiales	Oleaceae	Fraxinus	Fraxinus caroliniana	Fraxinus caroliniana Mill.
3	Fuirena breviseta (Coville) Coville in Harper	Fuirena breviseta Coville	2719152	EXACT	100	ACCEPTED	SPECIES	Plantae	Tracheophyta	Liliopsida	Poales	Cyperaceae	Fuirena	Fuirena breviseta	Fuirena breviseta Coville
3	Galium obtusum Bigelow var. obtusum	Galium obtusum var. obtusum	7621122	EXACT	98	SYNONYM	VARIETY	Plantae	Tracheophyta	Magnoliopsida	Gentianales	Rubiaceae	Galium	Galium obtusum	Galium obtusum Bigelow
3	Galium pilosum Ait.	Galium pilosum Aiton	2913935	EXACT	100	ACCEPTED	SPECIES	Plantae	Tracheophyta	Magnoliopsida	Gentianales	Rubiaceae	Galium	Galium pilosum	Galium pilosum Aiton
3	Gnaphalium purpureum L.	Gnaphalium Adans., 1763	7655428	EXACT	94	ACCEPTED	GENUS	Plantae	Tracheophyta	Magnoliopsida	Asterales	Asteraceae	Gnaphalium	Gamochaeta purpurea	Gamochaeta purpurea (L.) Cabrera
3	Gaylussacia dumosa (Andrz.) T. & G.	Gaylussacia dumosa Torr. & A.Gray	2882744	EXACT	100	ACCEPTED	SPECIES	Plantae	Tracheophyta	Magnoliopsida	Ericales	Ericaceae	Gaylussacia	Gaylussacia dumosa	Gaylussacia dumosa Torr. & A.Gray
3	Gaylussacia frondosa (L.) T. & G.	Gaylussacia frondosa (L.) Torr. & A.Gray	2882729	EXACT	100	ACCEPTED	SPECIES	Plantae	Tracheophyta	Magnoliopsida	Ericales	Ericaceae	Gaylussacia	Gaylussacia frondosa	Gaylussacia frondosa (L.) Torr. & A.Gray
3	Gelsemium sempervirens¬†(L.) J. St.-Hil.	Gelsemium sempervirens (L.) J.St.-Hil.	3169513	EXACT	97	ACCEPTED	SPECIES	Plantae	Tracheophyta	Magnoliopsida	Gentianales	Gelsemiaceae	Gelsemium	Gelsemium sempervirens	Gelsemium sempervirens (L.) J.St.-Hil.
3	Geranium carolinianum L.	Geranium carolinianum L.	2890623	EXACT	100	ACCEPTED	SPECIES	Plantae	Tracheophyta	Magnoliopsida	Geraniales	Geraniaceae	Geranium	Geranium carolinianum	Geranium carolinianum L.
3	Glandularia pulchella (Sweet) Troncoso	Glandularia pulchella (Sweet) Tronc.	5341157	EXACT	100	SYNONYM	SPECIES	Plantae	Tracheophyta	Magnoliopsida	Lamiales	Verbenaceae	Glandularia	Glandularia tenera	Glandularia tenera (Spreng.) Cabrera
3	Gordonia lasianthus (L.) Ellis	Gordonia lasianthus (L.) Ellis	5421090	EXACT	100	ACCEPTED	SPECIES	Plantae	Tracheophyta	Magnoliopsida	Ericales	Theaceae	Gordonia	Gordonia lasianthus	Gordonia lasianthus (L.) Ellis
3	Hamamelis virginiana L.	Hamamelis virginiana L.	3152827	EXACT	100	ACCEPTED	SPECIES	Plantae	Tracheophyta	Magnoliopsida	Saxifragales	Hamamelidaceae	Hamamelis	Hamamelis virginiana	Hamamelis virginiana L.
3	Helenium amarum¬†(Raf.) H. Rock	Helenium amarum (Raf.) H.Rock	5401836	EXACT	98	ACCEPTED	SPECIES	Plantae	Tracheophyta	Magnoliopsida	Asterales	Asteraceae	Helenium	Helenium amarum	Helenium amarum (Raf.) H.Rock
3	Heterotheca subaxillaris (Lam.) Britt. & Rusby			NONE	100									Heterotheca subaxillaris	Heterotheca subaxillaris (Lam.) Britton & Rusby
3	Hieracium gronovii¬†L.	Hieracium gronovii L.	3136062	EXACT	97	ACCEPTED	SPECIES	Plantae	Tracheophyta	Magnoliopsida	Asterales	Asteraceae	Hieracium	Hieracium gronovii	Hieracium gronovii L.
3	Hedyotis procumbens (Walt. ex Gmel.) Fosb.	Hedyotis procumbens (Walter ex J.F.Gmel.) Fosberg	2908121	EXACT	100	SYNONYM	SPECIES	Plantae	Tracheophyta	Magnoliopsida	Gentianales	Rubiaceae	Houstonia	Houstonia procumbens	Houstonia procumbens (J.F.Gmel.) Standl.
3	Hypericum gentianoides (L.) BSP.	Hypericum gentianoides Britton	3189514	EXACT	81	ACCEPTED	SPECIES	Plantae	Tracheophyta	Magnoliopsida	Malpighiales	Hypericaceae	Hypericum	Hypericum gentianoides	Hypericum gentianoides Britton
3	Hypericum hypericoides (L.) Crantz	Hypericum hypericoides Crantz	3189520	EXACT	100	ACCEPTED	SPECIES	Plantae	Tracheophyta	Magnoliopsida	Malpighiales	Hypericaceae	Hypericum	Hypericum hypericoides	Hypericum hypericoides Crantz
3	Hypericum mutilum L.	Hypericum mutilum L.	3189462	EXACT	100	ACCEPTED	SPECIES	Plantae	Tracheophyta	Magnoliopsida	Malpighiales	Hypericaceae	Hypericum	Hypericum mutilum	Hypericum mutilum L.
3	Hypericum suffruticosum Adams & Robson	Hypericum suffruticosum P.Adams & N.Robson	7524879	EXACT	100	ACCEPTED	SPECIES	Plantae	Tracheophyta	Magnoliopsida	Malpighiales	Hypericaceae	Hypericum	Hypericum suffruticosum	Hypericum suffruticosum P.Adams & N.Robson
3	Hypericum reductum Adams	Hypericum reductum (Svens.) P.Adams	8425073	EXACT	100	SYNONYM	SPECIES	Plantae	Tracheophyta	Magnoliopsida	Malpighiales	Hypericaceae	Hypericum	Hypericum tenuifolium	Hypericum tenuifolium Pursh
3	Ilex amelanchier¬†M.A. Curtis ex Chapm.	Ilex amelanchier M.A.Curtis ex Chapm.	5414275	EXACT	97	ACCEPTED	SPECIES	Plantae	Tracheophyta	Magnoliopsida	Aquifoliales	Aquifoliaceae	Ilex	Ilex amelanchier	Ilex amelanchier M.A.Curtis ex Chapm.
3	Ilex coriacea¬†(Pursh) Chapm.	Ilex coriacea Chapm.	5414223	EXACT	97	ACCEPTED	SPECIES	Plantae	Tracheophyta	Magnoliopsida	Aquifoliales	Aquifoliaceae	Ilex	Ilex coriacea	Ilex coriacea Chapm.
3	Ilex glabra¬†(L.) A. Gray	Ilex glabra A.Gray	5414266	EXACT	98	ACCEPTED	SPECIES	Plantae	Tracheophyta	Magnoliopsida	Aquifoliales	Aquifoliaceae	Ilex	Ilex glabra	Ilex glabra A.Gray
3	Ilex opaca¬†Ait.	Ilex opaca Soland. ex Ait.	5414248	EXACT	97	ACCEPTED	SPECIES	Plantae	Tracheophyta	Magnoliopsida	Aquifoliales	Aquifoliaceae	Ilex	Ilex opaca	Ilex opaca Soland. ex Ait.
3	Ilex vomitoria¬†Ait.	Ilex vomitoria Aiton	5414250	EXACT	98	ACCEPTED	SPECIES	Plantae	Tracheophyta	Magnoliopsida	Aquifoliales	Aquifoliaceae	Ilex	Ilex vomitoria	Ilex vomitoria Aiton
3	Indigofera caroliniana Mill	Indigofera L.	2971355	EXACT	94	ACCEPTED	GENUS	Plantae	Tracheophyta	Magnoliopsida	Fabales	Fabaceae	Indigofera	Indigofera caroliniana	Indigofera caroliniana Mill.
3	Ipomoea pandurata (L.) G. Mey.	Ipomoea L.	2928509	HIGHERRANK	94	ACCEPTED	GENUS	Plantae	Tracheophyta	Magnoliopsida	Solanales	Convolvulaceae	Ipomoea	Ipomoea batatas	Ipomoea batatas (L.) Lam.
3	Ipomoea hederacea¬†Jacq.	Ipomoea hederacea Jacq.	2928538	EXACT	98	ACCEPTED	SPECIES	Plantae	Tracheophyta	Magnoliopsida	Solanales	Convolvulaceae	Ipomoea	Ipomoea hederacea	Ipomoea hederacea Jacq.
3	Ipomoea purpurea¬†(L.) Roth	Ipomoea purpurea (L.) Roth	2928576	EXACT	98	ACCEPTED	SPECIES	Plantae	Tracheophyta	Magnoliopsida	Solanales	Convolvulaceae	Ipomoea	Ipomoea purpurea	Ipomoea purpurea (L.) Roth
3	Ipomoea quamoclit¬†L.	Ipomoea quamoclit L.	2928562	EXACT	98	ACCEPTED	SPECIES	Plantae	Tracheophyta	Magnoliopsida	Solanales	Convolvulaceae	Ipomoea	Ipomoea quamoclit	Ipomoea quamoclit L.
3	Iris virginica L.	Iris virginica L.	5298008	EXACT	100	ACCEPTED	SPECIES	Plantae	Tracheophyta	Liliopsida	Asparagales	Iridaceae	Iris	Iris virginica	Iris virginica L.
3	Itea virginica L.	Itea virginica L.	5362113	EXACT	100	ACCEPTED	SPECIES	Plantae	Tracheophyta	Magnoliopsida	Saxifragales	Iteaceae	Itea	Itea virginica	Itea virginica L.
3	Jacquemontia tamnifolia¬†(L.) Griseb.	Jacquemontia tamnifolia (L.) Griseb.	5341725	EXACT	98	ACCEPTED	SPECIES	Plantae	Tracheophyta	Magnoliopsida	Solanales	Convolvulaceae	Jacquemontia	Jacquemontia tamnifolia	Jacquemontia tamnifolia (L.) Griseb.
3	Juncus dichotomus Ell.	Juncus dichotomus Elliott	2701120	EXACT	100	ACCEPTED	SPECIES	Plantae	Tracheophyta	Liliopsida	Poales	Juncaceae	Juncus	Juncus dichotomus	Juncus dichotomus Elliott
3	Juncus effusus. L.	Juncus effusus L.	2701311	EXACT	100	ACCEPTED	SPECIES	Plantae	Tracheophyta	Liliopsida	Poales	Juncaceae	Juncus	Juncus effusus	Juncus effusus L.
3	Juncus polycephalus Michx.	Juncus polycephalus Michx.	2702076	EXACT	100	ACCEPTED	SPECIES	Plantae	Tracheophyta	Liliopsida	Poales	Juncaceae	Juncus	Juncus polycephalus	Juncus polycephalus Michx.
3	Juncus scirpoides Lam.	Juncus scirpoides Lam.	2701678	EXACT	100	ACCEPTED	SPECIES	Plantae	Tracheophyta	Liliopsida	Poales	Juncaceae	Juncus	Juncus scirpoides	Juncus scirpoides Lam.
3	Juniperus virginiana L.	Juniperus virginiana L.	2684391	EXACT	100	ACCEPTED	SPECIES	Plantae	Tracheophyta	Pinopsida	Pinales	Cupressaceae	Juniperus	Juniperus virginiana	Juniperus virginiana L.
3	Kalmia hirsuta Walt.	Kalmia hirsuta Walter	2882993	EXACT	100	ACCEPTED	SPECIES	Plantae	Tracheophyta	Magnoliopsida	Ericales	Ericaceae	Kalmia	Kalmia hirsuta	Kalmia hirsuta Walter
3	Krigia virginica (L.) Willd.	Krigia Schreb.	3132392	EXACT	94	ACCEPTED	GENUS	Plantae	Tracheophyta	Magnoliopsida	Asterales	Asteraceae	Krigia	Krigia virginica	Krigia virginica Willd.
3	Lactuca floridana (L.) Gaertn.	Lactuca L.	3140231	EXACT	94	ACCEPTED	GENUS	Plantae	Tracheophyta	Magnoliopsida	Asterales	Asteraceae	Lactuca	Lactuca floridana	Lactuca floridana (L.) Gaertn.
3	Lactuca graminifolia¬†Michx.	Lactuca graminifolia Michx.	3140577	EXACT	98	ACCEPTED	SPECIES	Plantae	Tracheophyta	Magnoliopsida	Asterales	Asteraceae	Lactuca	Lactuca graminifolia	Lactuca graminifolia Michx.
3	Lactuca hirsuta¬†Muhl. ex Nutt.	Lactuca hirsuta Muhl. ex Nutt.	7521930	EXACT	97	ACCEPTED	SPECIES	Plantae	Tracheophyta	Magnoliopsida	Asterales	Asteraceae	Lactuca	Lactuca hirsuta	Lactuca hirsuta Muhl. ex Nutt.
3	Lantana horrida HBK.	Lantana horrida Kunth	2925336	EXACT	83	ACCEPTED	SPECIES	Plantae	Tracheophyta	Magnoliopsida	Lamiales	Verbenaceae	Lantana	Lantana horrida	Lantana horrida Kunth
3	Lemna valdiviana Phil.	Lemna valdiviana Phil.	2867612	EXACT	100	ACCEPTED	SPECIES	Plantae	Tracheophyta	Liliopsida	Alismatales	Araceae	Lemna	Lemna valdiviana	Lemna valdiviana Phil.
3	Lepidium virginicum L.	Lepidium virginicum L.	5376648	EXACT	100	ACCEPTED	SPECIES	Plantae	Tracheophyta	Magnoliopsida	Brassicales	Brassicaceae	Lepidium	Lepidium virginicum	Lepidium virginicum L.
3	Lespedeza hirta (L.) Homem.	Lespedeza Michx.	2955600	HIGHERRANK	94	ACCEPTED	GENUS	Plantae	Tracheophyta	Magnoliopsida	Fabales	Fabaceae	Lespedeza	Lespedeza hirta	Lespedeza hirta Hornem.
3	Lespedeza cuniata (Dumont) G. Don	Lespedeza cuneata (Dum.Cours.) G.Don	8114276	FUZZY	95	SYNONYM	SPECIES	Plantae	Tracheophyta	Magnoliopsida	Fabales	Fabaceae	Lespedeza	Lespedeza juncea	Lespedeza juncea (L.) Pers.
3	Lespedeza repens (L.) Barton	Lespedeza repens Barton	2955745	EXACT	100	ACCEPTED	SPECIES	Plantae	Tracheophyta	Magnoliopsida	Fabales	Fabaceae	Lespedeza	Lespedeza repens	Lespedeza repens Barton
3	Liatris gracilis Pursh	Liatris Schreb.	3104263	EXACT	94	ACCEPTED	GENUS	Plantae	Tracheophyta	Magnoliopsida	Asterales	Asteraceae	Liatris	Liatris gracilis	Liatris gracilis Pursh
3	Liatris tenuifolia¬†Nutt.	Liatris tenuifolia Nutt.	3104337	EXACT	98	ACCEPTED	SPECIES	Plantae	Tracheophyta	Magnoliopsida	Asterales	Asteraceae	Liatris	Liatris tenuifolia	Liatris tenuifolia Nutt.
3	Licania michauxii Prance	Licania michauxii Prance	2985315	EXACT	100	ACCEPTED	SPECIES	Plantae	Tracheophyta	Magnoliopsida	Malpighiales	Chrysobalanaceae	Licania	Licania michauxii	Licania michauxii Prance
3	Ligustrum sinense Lour.	Ligustrum sinense Lour.	3172294	EXACT	100	ACCEPTED	SPECIES	Plantae	Tracheophyta	Magnoliopsida	Lamiales	Oleaceae	Ligustrum	Ligustrum sinense	Ligustrum sinense Lour.
3	Linaria canadensis (L.) Dumont.	Linaria canadensis (L.) Dumort.	7497062	EXACT	100	DOUBTFUL	SPECIES	Plantae	Tracheophyta	Magnoliopsida	Lamiales	Plantaginaceae	Linaria	Linaria canadensis	Linaria canadensis (L.) Dum.-Courset
3	Liquidambar styraciflua L.	Liquidambar styraciflua L.	3152824	EXACT	100	ACCEPTED	SPECIES	Plantae	Tracheophyta	Magnoliopsida	Saxifragales	Altingiaceae	Liquidambar	Liquidambar styraciflua	Liquidambar styraciflua L.
3	Liriodendron tulipifera L.	Liriodendron tulipifera L.	3152861	EXACT	100	ACCEPTED	SPECIES	Plantae	Tracheophyta	Magnoliopsida	Magnoliales	Magnoliaceae	Liriodendron	Liriodendron tulipifera	Liriodendron tulipifera L.
3	Lobelia flaccidifolia Small	Lobelia flaccidifolia Small	5408788	EXACT	100	ACCEPTED	SPECIES	Plantae	Tracheophyta	Magnoliopsida	Asterales	Campanulaceae	Lobelia	Lobelia flaccidifolia	Lobelia flaccidifolia Small
3	Lolium perenne L.	Lolium perenne L.	2706241	EXACT	100	ACCEPTED	SPECIES	Plantae	Tracheophyta	Liliopsida	Poales	Poaceae	Lolium	Lolium perenne	Lolium perenne L.
3	Lonicera japonica Thunb.	Lonicera japonica Thunb.	5334240	EXACT	100	ACCEPTED	SPECIES	Plantae	Tracheophyta	Magnoliopsida	Dipsacales	Caprifoliaceae	Lonicera	Lonicera japonica	Lonicera japonica Thunb.
3	Lonicera sempervirens L.	Lonicera sempervirens L.	5334239	EXACT	100	ACCEPTED	SPECIES	Plantae	Tracheophyta	Magnoliopsida	Dipsacales	Caprifoliaceae	Lonicera	Lonicera sempervirens	Lonicera sempervirens L.
3	Woodwardia areolata¬†(L.) T. Moore	Woodwardia areolata (L.) Moore	5275360	EXACT	98	SYNONYM	SPECIES	Plantae	Tracheophyta	Polypodiopsida	Polypodiales	Blechnaceae	Lorinseria	Lorinseria areolata	Lorinseria areolata C.Presl
3	Ludwigia alternifolia L.	Ludwigia alternifolia L.	5420992	EXACT	100	ACCEPTED	SPECIES	Plantae	Tracheophyta	Magnoliopsida	Myrtales	Onagraceae	Ludwigia	Ludwigia alternifolia	Ludwigia alternifolia L.
3	Ludwigia decurrens Walt.	Ludwigia decurrens Walter	5421002	EXACT	100	ACCEPTED	SPECIES	Plantae	Tracheophyta	Magnoliopsida	Myrtales	Onagraceae	Ludwigia	Ludwigia decurrens	Ludwigia decurrens Walter
3	Ludwigia linearis Walt.	Ludwigia linearis Walter	5420989	EXACT	100	ACCEPTED	SPECIES	Plantae	Tracheophyta	Magnoliopsida	Myrtales	Onagraceae	Ludwigia	Ludwigia linearis	Ludwigia linearis Walter
3	Ludwigia palustris (L.) Ell.	Ludwigia palustris (L.) Elliott	5421025	EXACT	100	ACCEPTED	SPECIES	Plantae	Tracheophyta	Magnoliopsida	Myrtales	Onagraceae	Ludwigia	Ludwigia palustris	Ludwigia palustris (L.) Elliott
3	Ludwigia pilosa Walt.	Ludwigia pilosa Walter	5421011	EXACT	100	ACCEPTED	SPECIES	Plantae	Tracheophyta	Magnoliopsida	Myrtales	Onagraceae	Ludwigia	Ludwigia pilosa	Ludwigia pilosa Walter
3	Lupinus diffusus Nutt.	Lupinus diffusus Nutt.	2964138	EXACT	100	ACCEPTED	SPECIES	Plantae	Tracheophyta	Magnoliopsida	Fabales	Fabaceae	Lupinus	Lupinus diffusus	Lupinus diffusus Nutt.
3	Lycopus angustifolius (Ell.) Ahles	Lycopus angustifolius Elliott	5341467	EXACT	81	ACCEPTED	SPECIES	Plantae	Tracheophyta	Magnoliopsida	Lamiales	Lamiaceae	Lycopus	Lycopus angustifolius	Lycopus angustifolius Elliott
3	Lyonia lucida (Lam.) K. Koch	Lyonia lucida K.Koch	5333386	EXACT	100	DOUBTFUL	SPECIES	Plantae	Tracheophyta	Magnoliopsida	Ericales	Ericaceae	Lyonia	Lyonia lucida	Lyonia lucida (Lam.) C.Koch
3	Lyonia mariana (L.) D. Don	Lyonia mariana D.Don	5333392	EXACT	100	ACCEPTED	SPECIES	Plantae	Tracheophyta	Magnoliopsida	Ericales	Ericaceae	Lyonia	Lyonia mariana	Lyonia mariana D.Don
3	Magnolia grandiflora L.	Magnolia grandiflora L.	9605163	EXACT	100	ACCEPTED	SPECIES	Plantae	Tracheophyta	Magnoliopsida	Magnoliales	Magnoliaceae	Magnolia	Magnolia grandiflora	Magnolia grandiflora L.
3	Magnolia virginiana L.	Magnolia virginiana L.	3153639	EXACT	100	ACCEPTED	SPECIES	Plantae	Tracheophyta	Magnoliopsida	Magnoliales	Magnoliaceae	Magnolia	Magnolia virginiana	Magnolia virginiana L.
3	Melia azedarach L.	Melia azedarach L.	5914287	EXACT	100	ACCEPTED	SPECIES	Plantae	Tracheophyta	Magnoliopsida	Sapindales	Meliaceae	Melia	Melia azedarach	Melia azedarach L.
3	Mikania scandens¬†(L.) Willd.	Mikania scandens Willd.	5398828	EXACT	98	ACCEPTED	SPECIES	Plantae	Tracheophyta	Magnoliopsida	Asterales	Asteraceae	Mikania	Mikania scandens	Mikania scandens Willd.
3	Schrankia microphylla (Dry.) MacBride	Schrankia microphylla (Dryand.) J.F.Macbr.	5358382	EXACT	100	SYNONYM	SPECIES	Plantae	Tracheophyta	Magnoliopsida	Fabales	Fabaceae	Mimosa	Mimosa quadrivalvis	Mimosa quadrivalvis L.
3	Arenaria caroliniana Walt.	Arenaria caroliniana Walt.	5384557	EXACT	100	SYNONYM	SPECIES	Plantae	Tracheophyta	Magnoliopsida	Caryophyllales	Caryophyllaceae	Mononeuria	Mononeuria caroliniana	Mononeuria caroliniana (Walter) Dillenb. & Rabeler
3	Myrica heterophylla Raf.	Myrica heterophylla Raf.	5414220	EXACT	100	SYNONYM	SPECIES	Plantae	Tracheophyta	Magnoliopsida	Fagales	Myricaceae	Morella	Morella caroliniensis	Morella caroliniensis (Mill.) Small
3	Myrica cerifera L. var. cerifera	Myrica cerifera L.	5414216	HIGHERRANK	97	SYNONYM	SPECIES	Plantae	Tracheophyta	Magnoliopsida	Fagales	Myricaceae	Morella	Morella cerifera	Morella cerifera Small
3	Myrica cerifera var. pumila Michx.	Myrica cerifera var. pumila Michx.	5414215	EXACT	100	SYNONYM	VARIETY	Plantae	Tracheophyta	Magnoliopsida	Fagales	Myricaceae	Morella	Morella cerifera	Morella cerifera Small
3	Marus rubra L.	Morus rubra L.	5361886	FUZZY	91	ACCEPTED	SPECIES	Plantae	Tracheophyta	Magnoliopsida	Rosales	Moraceae	Morus	Morus rubra	Morus rubra L.
3	Murdannia keisak (Hassk.) Hand.	Murdannia keisak (Hassk.) Hand.-Mazz.	2764809	EXACT	89	ACCEPTED	SPECIES	Plantae	Tracheophyta	Liliopsida	Commelinales	Commelinaceae	Murdannia	Murdannia keisak	Murdannia keisak (Hassk.) Hand.-Mazz.
3	Myriophyllum heterophyllum Michx.	Myriophyllum heterophyllum Michx.	5361762	EXACT	100	ACCEPTED	SPECIES	Plantae	Tracheophyta	Magnoliopsida	Saxifragales	Haloragaceae	Myriophyllum	Myriophyllum heterophyllum	Myriophyllum heterophyllum Michx.
3	Narcissus incomparabilis Mill.	Narcissus incomparabilis Mill.	2859255	EXACT	100	ACCEPTED	SPECIES	Plantae	Tracheophyta	Liliopsida	Asparagales	Amaryllidaceae	Narcissus	Narcissus incomparabilis	Narcissus incomparabilis Mill.
3	Narcissus jonquilla L.	Narcissus jonquilla L.	2858909	EXACT	100	ACCEPTED	SPECIES	Plantae	Tracheophyta	Liliopsida	Asparagales	Amaryllidaceae	Narcissus	Narcissus jonquilla	Narcissus jonquilla L.
3	Nolina georgiana	Nolina georgiana Michx.	2776983	EXACT	98	ACCEPTED	SPECIES	Plantae	Tracheophyta	Liliopsida	Asparagales	Asparagaceae	Nolina	Nolina georgiana	Nolina georgiana Michx.
3	Nymphaea odorata Ait.	Nymphaea odorata Aiton	2882412	EXACT	100	ACCEPTED	SPECIES	Plantae	Tracheophyta	Magnoliopsida	Nymphaeales	Nymphaeaceae	Nymphaea	Nymphaea odorata	Nymphaea odorata Aiton
3	Nymphoides aquatica (Walt.) Kuntze	Nymphoides aquatica Kuntze	5341508	EXACT	100	ACCEPTED	SPECIES	Plantae	Tracheophyta	Magnoliopsida	Asterales	Menyanthaceae	Nymphoides	Nymphoides aquatica	Nymphoides aquatica Kuntze
3	Nyssa ogeche Bartr. ex Marsh.	Nyssa ogeche Marshall	5383722	EXACT	100	ACCEPTED	SPECIES	Plantae	Tracheophyta	Magnoliopsida	Cornales	Nyssaceae	Nyssa	Nyssa ogeche	Nyssa ogeche Marshall
3	Nyssa biflora Walt.	Nyssa biflora Walter	5383713	EXACT	100	SYNONYM	SPECIES	Plantae	Tracheophyta	Magnoliopsida	Cornales	Nyssaceae	Nyssa	Nyssa sylvatica	Nyssa sylvatica Marshall
3	Oenothera biennis L.	Oenothera biennis L.	3188924	EXACT	100	ACCEPTED	SPECIES	Plantae	Tracheophyta	Magnoliopsida	Myrtales	Onagraceae	Oenothera	Oenothera biennis	Oenothera biennis L.
3	Gaura filipes Spach.	Gaura filipes Spach	3189239	EXACT	100	SYNONYM	SPECIES	Plantae	Tracheophyta	Magnoliopsida	Myrtales	Onagraceae	Oenothera	Oenothera filipes	Oenothera filipes (Spach) W.L.Wagner & Hoch
3	Oenothera laciniata Hill var. laciniata	Oenothera laciniata var. laciniata	7322346	EXACT	98	SYNONYM	VARIETY	Plantae	Tracheophyta	Magnoliopsida	Myrtales	Onagraceae	Oenothera	Oenothera laciniata	Oenothera laciniata Hill
3	Hedyotis boscii DC.	Hedyotis boscii DC.	2916124	EXACT	100	SYNONYM	SPECIES	Plantae	Tracheophyta	Magnoliopsida	Gentianales	Rubiaceae	Oldenlandia	Oldenlandia boscii	Oldenlandia boscii Chapm.
3	Opuntia humifusa Raf.	Opuntia humifusa Raf.	5384047	EXACT	100	ACCEPTED	SPECIES	Plantae	Tracheophyta	Magnoliopsida	Caryophyllales	Cactaceae	Opuntia	Opuntia humifusa	Opuntia humifusa Raf.
3	Osmunda regalis¬†L.	Osmunda regalis L.	8049341	EXACT	98	ACCEPTED	SPECIES	Plantae	Tracheophyta	Polypodiopsida	Osmundales	Osmundaceae	Osmunda	Osmunda regalis	Osmunda regalis L.
3	Osmunda cinnamomea¬†L.	Osmunda cinnamomea L.	2651326	EXACT	98	SYNONYM	SPECIES	Plantae	Tracheophyta	Polypodiopsida	Osmundales	Osmundaceae	Osmundastrum	Osmundastrum cinnamomeum	Osmundastrum cinnamomeum (L.) C.Presl
3	Oxalis corniculata L.	Oxalis corniculata L.	8427624	EXACT	100	ACCEPTED	SPECIES	Plantae	Tracheophyta	Magnoliopsida	Oxalidales	Oxalidaceae	Oxalis	Oxalis corniculata	Oxalis corniculata L.
3	Senecio tomentosus Michx.	Senecio Herbarium Practice & Following Welman.	9802230	EXACT	94	ACCEPTED	GENUS	Plantae	Tracheophyta	Magnoliopsida	Asterales	Asteraceae	Senecio	Packera tomentosa	Packera tomentosa (Michx.) C.Jeffrey
3	Dichanthelium aciculare (Desv. ex. Poir.) Gould & Clark	Dichanthelium aciculare (Desv.) Gould & C.A.Clark	2702633	EXACT	99	SYNONYM	SPECIES	Plantae	Tracheophyta	Liliopsida	Poales	Poaceae	Panicum	Panicum aciculare	Panicum aciculare Desv.
3	Dichanthelium acuminatum (Sw.) Gould & Clark	Dichanthelium acuminatum (Sw.) Gould & C.A.Clark	2702678	EXACT	100	SYNONYM	SPECIES	Plantae	Tracheophyta	Liliopsida	Poales	Poaceae	Panicum	Panicum acuminatum	Panicum acuminatum Sw.
3	Dichanthelium depauperatum (Muhl.) Gould	Dichanthelium depauperatum (Muhl.) Gould	2702591	EXACT	100	SYNONYM	SPECIES	Plantae	Tracheophyta	Liliopsida	Poales	Poaceae	Panicum	Panicum depauperatum	Panicum depauperatum Muhl.
3	Panicum dichotomiflorum Michx.	Panicum dichotomiflorum Michx.	2705144	EXACT	100	ACCEPTED	SPECIES	Plantae	Tracheophyta	Liliopsida	Poales	Poaceae	Panicum	Panicum dichotomiflorum	Panicum dichotomiflorum Michx.
3	Dichanthelium dichotomum (L.) Gould	Dichanthelium dichotomum (L.) Gould	8545872	EXACT	100	SYNONYM	SPECIES	Plantae	Tracheophyta	Liliopsida	Poales	Poaceae	Panicum	Panicum dichotomum	Panicum dichotomum L.
3	Dichanthelium linearifolium (Scribn.) Gould & Clark	Dichanthelium linearifolium (Scribn.) Gould	2702666	EXACT	100	SYNONYM	SPECIES	Plantae	Tracheophyta	Liliopsida	Poales	Poaceae	Panicum	Panicum linearifolium	Panicum linearifolium Scribn.
3	Dichanthelium oligosanthes Schult.	Dichanthelium oligosanthes (Schult.) Gould	2702602	EXACT	82	SYNONYM	SPECIES	Plantae	Tracheophyta	Liliopsida	Poales	Poaceae	Panicum	Panicum oligosanthes	Panicum oligosanthes Schult.
3	Dichanthelium consanguineum (Kunth) Guild & Clark	Dichanthelium consanguineum (Kunth) Gould & C.A.Clark	2702652	EXACT	100	SYNONYM	SPECIES	Plantae	Tracheophyta	Liliopsida	Poales	Poaceae	Panicum	Panicum ovale	Panicum ovale Elliott
3	Panicum repens L.	Panicum repens L.	2705093	EXACT	100	ACCEPTED	SPECIES	Plantae	Tracheophyta	Liliopsida	Poales	Poaceae	Panicum	Panicum repens	Panicum repens L.
3	Dichanthelium sabulorum (Lam.) Gould & Clark	Dichanthelium sabulorum (Lam.) Gould & C.A.Clark	2702620	EXACT	100	SYNONYM	SPECIES	Plantae	Tracheophyta	Liliopsida	Poales	Poaceae	Panicum	Panicum sabulorum	Panicum sabulorum Lam.
3	Dichanthelium scabriusculum (Ell.) Gould	Dichanthelium scabriusculum (Elliott) Gould & C.A.Clark	2702613	EXACT	100	SYNONYM	SPECIES	Plantae	Tracheophyta	Liliopsida	Poales	Poaceae	Panicum	Panicum scabriusculum	Panicum scabriusculum Elliott
3	Dichanthelium scoparium (Lam.) Gould	Dichanthelium scoparium (Lam.) Gould	2702562	EXACT	100	SYNONYM	SPECIES	Plantae	Tracheophyta	Liliopsida	Poales	Poaceae	Panicum	Panicum scoparium	Panicum scoparium Lam.
3	Dichanthelium strigosum (Muhl.) Freckmann	Dichanthelium strigosum (Muhl. ex Elliott) Freckmann	2702542	EXACT	99	SYNONYM	SPECIES	Plantae	Tracheophyta	Liliopsida	Poales	Poaceae	Panicum	Panicum strigosum	Panicum strigosum Muhl. ex Elliott
3	Parthenocissus quinquefolia (L.) Planchon	Parthenocissus quinquefolia (L.) Planch.	3039194	EXACT	100	ACCEPTED	SPECIES	Plantae	Tracheophyta	Magnoliopsida	Vitales	Vitaceae	Parthenocissus	Parthenocissus quinquefolia	Parthenocissus quinquefolia (L.) Planch.
3	Paspalum laeve Michx.	Paspalum laeve Michx.	2705589	EXACT	100	ACCEPTED	SPECIES	Plantae	Tracheophyta	Liliopsida	Poales	Poaceae	Paspalum	Paspalum laeve	Paspalum laeve Michx.
3	Paspalum notatum var. saurae Paradi	Paspalum notatum var. saurae Parodi	4106609	EXACT	82	SYNONYM	VARIETY	Plantae	Tracheophyta	Liliopsida	Poales	Poaceae	Paspalum	Paspalum saurae	Paspalum saurae (Parodi) Parodi
3	Paspalum setaceum Michx.	Paspalum setaceum Michx.	2705541	EXACT	100	ACCEPTED	SPECIES	Plantae	Tracheophyta	Liliopsida	Poales	Poaceae	Paspalum	Paspalum setaceum	Paspalum setaceum Michx.
3	Palpalum urvillei Steud.	Paspalum urvillei Steud.	2705650	FUZZY	91	ACCEPTED	SPECIES	Plantae	Tracheophyta	Liliopsida	Poales	Poaceae	Paspalum	Paspalum urvillei	Paspalum urvillei Steud.
3	Passiflora incarnata L.	Passiflora incarnata L.	2874218	EXACT	100	ACCEPTED	SPECIES	Plantae	Tracheophyta	Magnoliopsida	Malpighiales	Passifloraceae	Passiflora	Passiflora incarnata	Passiflora incarnata L.
3	Penstemon australis Small	Penstemon australis Small	3171553	EXACT	100	ACCEPTED	SPECIES	Plantae	Tracheophyta	Magnoliopsida	Lamiales	Plantaginaceae	Penstemon	Penstemon australis	Penstemon australis Small
3	Persea palustris (Raf.) Sarg.	Persea palustris (Raf.) Sarg.	3034052	EXACT	100	ACCEPTED	SPECIES	Plantae	Tracheophyta	Magnoliopsida	Laurales	Lauraceae	Persea	Persea palustris	Persea palustris (Raf.) Sarg.
3	Polygonum punctatum Ell.	Polygonum punctatum Ell.	5334330	EXACT	100	SYNONYM	SPECIES	Plantae	Tracheophyta	Magnoliopsida	Caryophyllales	Polygonaceae	Persicaria	Persicaria punctata	Persicaria punctata Small
3	Phoradendron serotinum (Raf.) M.C. Johnston	Phoradendron serotinum (Rafin.) M.C.Johnston	2889890	EXACT	100	SYNONYM	SPECIES	Plantae	Tracheophyta	Magnoliopsida	Santalales	Santalaceae	Phoradendron	Phoradendron leucarpum	Phoradendron leucarpum (Raf.) Reveal & M.C.Johnst.
3	Pinus elliottii¬†Engelm.	Pinus elliottii Engelm.	5285777	EXACT	98	ACCEPTED	SPECIES	Plantae	Tracheophyta	Pinopsida	Pinales	Pinaceae	Pinus	Pinus elliottii	Pinus elliottii Engelm.
3	Pinus palustris Mill.	Pinus palustris Mill.	5285816	EXACT	100	ACCEPTED	SPECIES	Plantae	Tracheophyta	Pinopsida	Pinales	Pinaceae	Pinus	Pinus palustris	Pinus palustris Mill.
3	Pinus serotina¬†Michx.	Pinus serotina Michx.	5285602	EXACT	98	ACCEPTED	SPECIES	Plantae	Tracheophyta	Pinopsida	Pinales	Pinaceae	Pinus	Pinus serotina	Pinus serotina Michx.
3	Pinus taeda¬†L.	Pinus taeda L.	5285241	EXACT	97	ACCEPTED	SPECIES	Plantae	Tracheophyta	Pinopsida	Pinales	Pinaceae	Pinus	Pinus taeda	Pinus taeda L.
3	Chrysopsis graminifolia var. aspera (Shuttlew. ex Small) A.¬†Gray	Chrysopsis graminifolia var. aspera A.Gray	5699169	EXACT	82	SYNONYM	VARIETY	Plantae	Tracheophyta	Magnoliopsida	Asterales	Asteraceae	Pityopsis	Pityopsis aspera	Pityopsis aspera (A.Gray) Small
3	Plantago aristata Michx.	Plantago aristata Michx.	3189696	EXACT	100	ACCEPTED	SPECIES	Plantae	Tracheophyta	Magnoliopsida	Lamiales	Plantaginaceae	Plantago	Plantago aristata	Plantago aristata Michx.
3	Plantago virginica L.	Plantago virginica L.	3189751	EXACT	100	ACCEPTED	SPECIES	Plantae	Tracheophyta	Magnoliopsida	Lamiales	Plantaginaceae	Plantago	Plantago virginica	Plantago virginica L.
3	Plantago wrightiana Decne.	Plantago wrightiana Decne.	3189732	EXACT	100	ACCEPTED	SPECIES	Plantae	Tracheophyta	Magnoliopsida	Lamiales	Plantaginaceae	Plantago	Plantago wrightiana	Plantago wrightiana Decne.
3	Platanus occidentalis L.	Platanus occidentalis L.	3152820	EXACT	100	ACCEPTED	SPECIES	Plantae	Tracheophyta	Magnoliopsida	Proteales	Platanaceae	Platanus	Platanus occidentalis	Platanus occidentalis L.
3	Pleopeltis polypodioides¬†(L.) E.G. Andrews & Windham	Pleopeltis polypodioides (L.) E.G.Andrews & Windham	2650496	EXACT	97	ACCEPTED	SPECIES	Plantae	Tracheophyta	Polypodiopsida	Polypodiales	Polypodiaceae	Pleopeltis	Pleopeltis polypodioides	Pleopeltis polypodioides (L.) E.G.Andrews & Windham
3	Pluchea foetida¬†(L.) DC.	Pluchea foetida (L.) DC.	3132645	EXACT	97	ACCEPTED	SPECIES	Plantae	Tracheophyta	Magnoliopsida	Asterales	Asteraceae	Pluchea	Pluchea foetida	Pluchea foetida (L.) DC.
3	Poa annua L.	Poa annua L.	2704179	EXACT	100	ACCEPTED	SPECIES	Plantae	Tracheophyta	Liliopsida	Poales	Poaceae	Poa	Poa annua	Poa annua L.
3	Polygala lutea L.	Polygala lutea L.	3191419	EXACT	100	ACCEPTED	SPECIES	Plantae	Tracheophyta	Magnoliopsida	Fabales	Polygalaceae	Polygala	Polygala lutea	Polygala lutea L.
3	Polygala nana (Michx.) DC.	Polygala nana (Michx.) DC.	3191453	EXACT	100	ACCEPTED	SPECIES	Plantae	Tracheophyta	Magnoliopsida	Fabales	Polygalaceae	Polygala	Polygala nana	Polygala nana (Michx.) DC.
3	Polygala polygama Walt.	Polygala polygama Walter	3191425	EXACT	100	ACCEPTED	SPECIES	Plantae	Tracheophyta	Magnoliopsida	Fabales	Polygalaceae	Polygala	Polygala polygama	Polygala polygama Walter
3	Polygonella fimbriata (L.) Horton	Polygonella fimbriata (Ell.) Horton	5334499	EXACT	100	ACCEPTED	SPECIES	Plantae	Tracheophyta	Magnoliopsida	Caryophyllales	Polygonaceae	Polygonella	Polygonella fimbriata	Polygonella fimbriata (Ell.) Horton
3	Prunus angustifolia Marsh.	Prunus angustifolia Marshall	3021368	EXACT	100	ACCEPTED	SPECIES	Plantae	Tracheophyta	Magnoliopsida	Rosales	Rosaceae	Prunus	Prunus angustifolia	Prunus angustifolia Marshall
3	Prunus serotina Ehrh.	Prunus serotina Ehrh.	3021850	EXACT	100	ACCEPTED	SPECIES	Plantae	Tracheophyta	Magnoliopsida	Rosales	Rosaceae	Prunus	Prunus serotina	Prunus serotina Ehrh.
3	Gnaphalium obtusifolium L.	Gnaphalium Adans., 1763	7655428	EXACT	94	ACCEPTED	GENUS	Plantae	Tracheophyta	Magnoliopsida	Asterales	Asteraceae	Gnaphalium	Pseudognaphalium obtusifolium	Pseudognaphalium obtusifolium (L.) Hilliard & B.L.Burtt
3	Pediomelum canescens (Michx.) Isely	Pediomelum canescens (Michx.) Rydb.	2944129	EXACT	88	SYNONYM	SPECIES	Plantae	Tracheophyta	Magnoliopsida	Fabales	Fabaceae	Psoralea	Psoralea canescens	Psoralea canescens Michx.
3	Orbexilum lupinellus (Michx.) Isely	Orbexilum lupinellus (Michx.) Isely	2944069	EXACT	100	SYNONYM	SPECIES	Plantae	Tracheophyta	Magnoliopsida	Fabales	Fabaceae	Psoralea	Psoralea lupinella	Psoralea lupinella Michx.
3	Pteridium aquilinum¬†(L.) Kuhn	Pteridium aquilinum (L.) Kuhn	5275012	EXACT	98	ACCEPTED	SPECIES	Plantae	Tracheophyta	Polypodiopsida	Polypodiales	Dennstaedtiaceae	Pteridium	Pteridium aquilinum	Pteridium aquilinum (L.) Kuhn
3	Pueraria lobata (Willd.) Ohwi	Pueraria lobata (Willd.) Ohwi	2977654	EXACT	100	SYNONYM	SPECIES	Plantae	Tracheophyta	Magnoliopsida	Fabales	Fabaceae	Pueraria	Pueraria montana	Pueraria montana (Lour.) Merr.
3	Quercus hemisphaerica Bartr.	Quercus hemisphaerica Bartr.	7966390	EXACT	100	DOUBTFUL	SPECIES	Plantae	Tracheophyta	Magnoliopsida	Fagales	Fagaceae	Quercus	Quercus hemisphaerica	Quercus hemisphaerica W.Bartram ex Willd.
3	Quercus incana Bartr.	Quercus incana W.Bartram	2878060	EXACT	100	ACCEPTED	SPECIES	Plantae	Tracheophyta	Magnoliopsida	Fagales	Fagaceae	Quercus	Quercus incana	Quercus incana W.Bartram
3	Quercus laevis Walt.	Quercus laevis Walter	2878626	EXACT	100	ACCEPTED	SPECIES	Plantae	Tracheophyta	Magnoliopsida	Fagales	Fagaceae	Quercus	Quercus laevis	Quercus laevis Walter
3	Quercus laurifolia Michx.	Quercus laurifolia Michx.	2877708	EXACT	100	ACCEPTED	SPECIES	Plantae	Tracheophyta	Magnoliopsida	Fagales	Fagaceae	Quercus	Quercus laurifolia	Quercus laurifolia Michx.
3	Quercus margaretta Ashe	Quercus margaretta Ashe	8995896	EXACT	100	ACCEPTED	SPECIES	Plantae	Tracheophyta	Magnoliopsida	Fagales	Fagaceae	Quercus	Quercus margaretta	Quercus margaretta Ashe
3	Quercus marilandica Muench.	Quercus marilandica M√ºnchh.	2881630	EXACT	100	ACCEPTED	SPECIES	Plantae	Tracheophyta	Magnoliopsida	Fagales	Fagaceae	Quercus	Quercus marilandica	Quercus marilandica M√ºnchh.
3	Quercus nigra L.	Quercus nigra L.	2879328	EXACT	100	ACCEPTED	SPECIES	Plantae	Tracheophyta	Magnoliopsida	Fagales	Fagaceae	Quercus	Quercus nigra	Quercus nigra L.
3	Quercus phellos L.	Quercus phellos L.	2880652	EXACT	100	ACCEPTED	SPECIES	Plantae	Tracheophyta	Magnoliopsida	Fagales	Fagaceae	Quercus	Quercus phellos	Quercus phellos L.
3	Rhexia lutea Walter	Rhexia lutea Walter	5420885	EXACT	100	ACCEPTED	SPECIES	Plantae	Tracheophyta	Magnoliopsida	Myrtales	Melastomataceae	Rhexia	Rhexia lutea	Rhexia lutea Walter
3	Rhexia mariana var. exalbida Michx.	Rhexia mariana var. exalbida Michx.	5600156	EXACT	100	SYNONYM	VARIETY	Plantae	Tracheophyta	Magnoliopsida	Myrtales	Melastomataceae	Rhexia	Rhexia mariana	Rhexia mariana L.
3	Rhododendron atlanticum (Ashe) Rehder	Rhododendron atlanticum Rehder	2883032	EXACT	100	ACCEPTED	SPECIES	Plantae	Tracheophyta	Magnoliopsida	Ericales	Ericaceae	Rhododendron	Rhododendron atlanticum	Rhododendron atlanticum Rehder
3	Rhododendron canescens (Michx.) Sweet	Rhododendron canescens (Michx.) Sweet	2883039	EXACT	100	SYNONYM	SPECIES	Plantae	Tracheophyta	Magnoliopsida	Ericales	Ericaceae	Rhododendron	Rhododendron canescens	Rhododendron canescens G.Don
3	Rhododendron pulchrum Sweet	Rhododendron pulchrum Sweet	4167103	EXACT	100	ACCEPTED	SPECIES	Plantae	Tracheophyta	Magnoliopsida	Ericales	Ericaceae	Rhododendron	Rhododendron pulchrum	Rhododendron pulchrum Sweet
3	Rhus copallinum¬†L.	Rhus copallina L.	3190557	FUZZY	96	ACCEPTED	SPECIES	Plantae	Tracheophyta	Magnoliopsida	Sapindales	Anacardiaceae	Rhus	Rhus copallina	Rhus copallina L.
3	Rhynchosia reniformis (Pursh) DC.	Rhynchosia reniformis DC.	5350795	EXACT	100	ACCEPTED	SPECIES	Plantae	Tracheophyta	Magnoliopsida	Fabales	Fabaceae	Rhynchosia	Rhynchosia reniformis	Rhynchosia reniformis DC.
3	Rhynchospora corniculata (Lam.) Gray	Rhynchospora corniculata (Lam.) A.Gray	2720590	EXACT	100	ACCEPTED	SPECIES	Plantae	Tracheophyta	Liliopsida	Poales	Cyperaceae	Rhynchospora	Rhynchospora corniculata	Rhynchospora corniculata (Lam.) A.Gray
3	Rhynchospora globularis (Chapm.) Small	Rhynchospora globularis (Chapm.) Small	2721796	EXACT	100	ACCEPTED	SPECIES	Plantae	Tracheophyta	Liliopsida	Poales	Cyperaceae	Rhynchospora	Rhynchospora globularis	Rhynchospora globularis (Chapm.) Small
3	Rhynchospora inexpansa (Michx.) Vahl.	Rhynchospora inexpansa Vahl	2721053	EXACT	100	ACCEPTED	SPECIES	Plantae	Tracheophyta	Liliopsida	Poales	Cyperaceae	Rhynchospora	Rhynchospora inexpansa	Rhynchospora inexpansa Vahl
3	Rhynchospora megalocarpa Gray	Rhynchospora megalocarpa A.Gray	2721068	EXACT	100	ACCEPTED	SPECIES	Plantae	Tracheophyta	Liliopsida	Poales	Cyperaceae	Rhynchospora	Rhynchospora megalocarpa	Rhynchospora megalocarpa A.Gray
3	Rhynchospora microcephala Britt. ex. Small	Rhynchospora Vahl	2701052	HIGHERRANK	94	ACCEPTED	GENUS	Plantae	Tracheophyta	Liliopsida	Poales	Cyperaceae	Rhynchospora	Rhynchospora microcephala	Rhynchospora microcephala (Britton) Britton
3	Rubus argutus Link.	Rubus argutus Link	2990801	EXACT	100	ACCEPTED	SPECIES	Plantae	Tracheophyta	Magnoliopsida	Rosales	Rosaceae	Rubus	Rubus argutus	Rubus argutus Link
3	Rubus cuneifolius Pursh	Rubus cuneifolius Pursh	2996841	EXACT	100	ACCEPTED	SPECIES	Plantae	Tracheophyta	Magnoliopsida	Rosales	Rosaceae	Rubus	Rubus cuneifolius	Rubus cuneifolius Pursh
3	Rubus flagellaris Willd.	Rubus flagellaris Willd.	2992071	EXACT	100	ACCEPTED	SPECIES	Plantae	Tracheophyta	Magnoliopsida	Rosales	Rosaceae	Rubus	Rubus flagellaris	Rubus flagellaris Willd.
3	Rubus trivialis Michx.	Rubus L.	2988638	HIGHERRANK	94	ACCEPTED	GENUS	Plantae	Tracheophyta	Magnoliopsida	Rosales	Rosaceae	Rubus	Rubus trivialis	Rubus trivialis Michx.
3	Rumex crispus L.	Rumex crispus L.	8195144	EXACT	100	ACCEPTED	SPECIES	Plantae	Tracheophyta	Magnoliopsida	Caryophyllales	Polygonaceae	Rumex	Rumex crispus	Rumex crispus L.
3	Rumex hastatulus Baldwin ex Ell.	Rumex hastatulus Baldwin ex Elliott, 1817	7840099	EXACT	100	DOUBTFUL	SPECIES	Plantae	Tracheophyta	Magnoliopsida	Caryophyllales	Polygonaceae	Rumex	Rumex hastatulus	Rumex hastatulus Baldwin
3	Sabatia dodecandra (L.) BSP.	Sabatia dodecandra (L.) Britton, Sterns & Poggenb.	5414529	EXACT	89	ACCEPTED	SPECIES	Plantae	Tracheophyta	Magnoliopsida	Gentianales	Gentianaceae	Sabatia	Sabatia dodecandra	Sabatia dodecandra (L.) Britton, Sterns & Poggenb.
3	Erianthus giganteus Muhl.	Erianthus giganteus (Walter) Muhl.	7698500	EXACT	100	SYNONYM	SPECIES	Plantae	Tracheophyta	Liliopsida	Poales	Poaceae	Saccharum	Saccharum giganteum	Saccharum giganteum Pers.
3	Sagittaria graminea Michx. var. graminea.	Sagittaria graminea var. graminea	8252280	EXACT	98	SYNONYM	VARIETY	Plantae	Tracheophyta	Liliopsida	Alismatales	Alismataceae	Sagittaria	Sagittaria graminea	Sagittaria graminea Michx.
3	Sagittaria graminea var. weatherbiana (Fern.) Bogin.	Sagittaria graminea var. weatherbiana (Fernald) Bogin	7968627	EXACT	100	SYNONYM	VARIETY	Plantae	Tracheophyta	Liliopsida	Alismatales	Alismataceae	Sagittaria	Sagittaria graminea	Sagittaria graminea Michx.
3	Salix caroliniana Michx.	Salix caroliniana Michx.	5373004	EXACT	100	ACCEPTED	SPECIES	Plantae	Tracheophyta	Magnoliopsida	Malpighiales	Salicaceae	Salix	Salix caroliniana	Salix caroliniana Michx.
3	Salvia azurea Lam.	Salvia azurea Lam.	2927067	EXACT	99	DOUBTFUL	SPECIES	Plantae	Tracheophyta	Magnoliopsida	Lamiales	Lamiaceae	Salvia	Salvia azurea	Salvia azurea Michx. ex Vahl
3	Salvia lyrata L.	Salvia lyrata L.	2927027	EXACT	100	ACCEPTED	SPECIES	Plantae	Tracheophyta	Magnoliopsida	Lamiales	Lamiaceae	Salvia	Salvia lyrata	Salvia lyrata L.
3	Sambucus canadensis L.	Sambucus canadensis L.	6369819	EXACT	100	ACCEPTED	SPECIES	Plantae	Tracheophyta	Magnoliopsida	Dipsacales	Adoxaceae	Sambucus	Sambucus canadensis	Sambucus canadensis L.
3	Sassafras albidum (Nutt.) Nees	Sassafras albidum (Nutt.) Nees	3034002	EXACT	100	ACCEPTED	SPECIES	Plantae	Tracheophyta	Magnoliopsida	Laurales	Lauraceae	Sassafras	Sassafras albidum	Sassafras albidum (Nutt.) Nees
3	Schizachyrium scoparium (Michx.) Nash	Schizachyrium scoparium (Michx.) Nash	2704432	EXACT	100	ACCEPTED	SPECIES	Plantae	Tracheophyta	Liliopsida	Poales	Poaceae	Schizachyrium	Schizachyrium scoparium	Schizachyrium scoparium (Michx.) Nash
3	Scirpus cyperinus (L.) Kunth.	Scirpus cyperinus Kunth	2720171	EXACT	100	ACCEPTED	SPECIES	Plantae	Tracheophyta	Liliopsida	Poales	Cyperaceae	Scirpus	Scirpus cyperinus	Scirpus cyperinus Kunth
3	Scleria triglomerata Michx.	Scleria triglomerata Michx.	2712681	EXACT	100	ACCEPTED	SPECIES	Plantae	Tracheophyta	Liliopsida	Poales	Cyperaceae	Scleria	Scleria triglomerata	Scleria triglomerata Michx.
3	Festuca elator L.	Festuca elatior L.	8083660	FUZZY	97	SYNONYM	SPECIES	Plantae	Tracheophyta	Liliopsida	Poales	Poaceae	Scolochloa	Scolochloa festucacea	Scolochloa festucacea Link
3	Scutellaria integrifolia L.	Scutellaria integrifolia L.	5341355	EXACT	100	ACCEPTED	SPECIES	Plantae	Tracheophyta	Magnoliopsida	Lamiales	Lamiaceae	Scutellaria	Scutellaria integrifolia	Scutellaria integrifolia L.
3	Selaginella arenicola¬†Underw.	Selaginella arenicola Underwood	2688204	EXACT	98	ACCEPTED	SPECIES	Plantae	Tracheophyta	Lycopodiopsida	Selaginellales	Selaginellaceae	Selaginella	Selaginella arenicola	Selaginella arenicola Underwood
3	Senna occidentalis (L.) Link	Senna occidentalis (L.) Link	2957966	EXACT	100	ACCEPTED	SPECIES	Plantae	Tracheophyta	Magnoliopsida	Fabales	Fabaceae	Senna	Senna occidentalis	Senna occidentalis (L.) Link
3	Seymeria pectinata Pursh.	Seymeria pectinata Pursh	3172006	EXACT	100	ACCEPTED	SPECIES	Plantae	Tracheophyta	Magnoliopsida	Lamiales	Orobanchaceae	Seymeria	Seymeria pectinata	Seymeria pectinata Pursh
3	Sida rhombifolia L.	Sida rhombifolia L.	5406735	EXACT	100	ACCEPTED	SPECIES	Plantae	Tracheophyta	Magnoliopsida	Malvales	Malvaceae	Sida	Sida rhombifolia	Sida rhombifolia L.
3	Silphium compositum Michx.	Silphium compositum Michx.	3092567	EXACT	100	ACCEPTED	SPECIES	Plantae	Tracheophyta	Magnoliopsida	Asterales	Asteraceae	Silphium	Silphium compositum	Silphium compositum Michx.
3	Sisyrinchium nashii Bickn.	Sisyrinchium nashii E.P.Bicknell	5296074	EXACT	100	ACCEPTED	SPECIES	Plantae	Tracheophyta	Liliopsida	Asparagales	Iridaceae	Sisyrinchium	Sisyrinchium nashii	Sisyrinchium nashii E.P.Bicknell
3	Smilax glauca Walt.	Smilax glauca Walter	5295374	EXACT	100	ACCEPTED	SPECIES	Plantae	Tracheophyta	Liliopsida	Liliales	Smilacaceae	Smilax	Smilax glauca	Smilax glauca Walter
3	Smilax laurifolia L.	Smilax laurifolia L.	5295268	EXACT	100	ACCEPTED	SPECIES	Plantae	Tracheophyta	Liliopsida	Liliales	Smilacaceae	Smilax	Smilax laurifolia	Smilax laurifolia L.
3	Smilax pumila Walt.	Smilax pumila Walter	5295658	EXACT	100	ACCEPTED	SPECIES	Plantae	Tracheophyta	Liliopsida	Liliales	Smilacaceae	Smilax	Smilax pumila	Smilax pumila Walter
3	Smilax walteri Pursh	Smilax walteri Pursh	5295687	EXACT	100	ACCEPTED	SPECIES	Plantae	Tracheophyta	Liliopsida	Liliales	Smilacaceae	Smilax	Smilax walteri	Smilax walteri Pursh
3	Solanum americanum Mill.	Solanum americanum Mill.	2930222	EXACT	100	ACCEPTED	SPECIES	Plantae	Tracheophyta	Magnoliopsida	Solanales	Solanaceae	Solanum	Solanum americanum	Solanum americanum Mill.
3	Solanum carolinense L.	Solanum carolinense L.	2932011	EXACT	100	ACCEPTED	SPECIES	Plantae	Tracheophyta	Magnoliopsida	Solanales	Solanaceae	Solanum	Solanum carolinense	Solanum carolinense L.
3	Solanum sarrachoides Sendtner	Solanum sarrachoides Sendtn.	2930805	EXACT	100	ACCEPTED	SPECIES	Plantae	Tracheophyta	Magnoliopsida	Solanales	Solanaceae	Solanum	Solanum sarrachoides	Solanum sarrachoides Sendtn.
3	Solidago canadensis¬†L.	Solidago canadensis L.	5389029	EXACT	98	ACCEPTED	SPECIES	Plantae	Tracheophyta	Magnoliopsida	Asterales	Asteraceae	Solidago	Solidago canadensis	Solidago canadensis L.
3	Solidago odora¬†Ait.	Solidago odora Aiton	5388923	EXACT	97	ACCEPTED	SPECIES	Plantae	Tracheophyta	Magnoliopsida	Asterales	Asteraceae	Solidago	Solidago odora	Solidago odora Aiton
3	Solidago petiolaris Ait.	Solidago petiolaris Ait.	5389089	EXACT	100	ACCEPTED	SPECIES	Plantae	Tracheophyta	Magnoliopsida	Asterales	Asteraceae	Solidago	Solidago petiolaris	Solidago petiolaris Ait.
3	Sonchus asper¬†(L.) Hill	Sonchus asper Hill	3105782	EXACT	97	ACCEPTED	SPECIES	Plantae	Tracheophyta	Magnoliopsida	Asterales	Asteraceae	Sonchus	Sonchus asper	Sonchus asper Hill
3	Sorghastrum secundum (Ell.) Nash	Sorghastrum secundum Nash	2704421	EXACT	100	ACCEPTED	SPECIES	Plantae	Tracheophyta	Liliopsida	Poales	Poaceae	Sorghastrum	Sorghastrum secundum	Sorghastrum secundum Nash
3	Spermolepis divaricata¬†(Walter)¬†Raf. ex Ser.	Spermolepis divaricata Raf.	5371848	EXACT	97	ACCEPTED	SPECIES	Plantae	Tracheophyta	Magnoliopsida	Apiales	Apiaceae	Spermolepis	Spermolepis divaricata	Spermolepis divaricata Raf.
3	Sphenopholis intermedia Rydberg	Sphenopholis intermedia Rydb.	2703359	EXACT	100	ACCEPTED	SPECIES	Plantae	Tracheophyta	Liliopsida	Poales	Poaceae	Sphenopholis	Sphenopholis intermedia	Sphenopholis intermedia Rydb.
3	Spirea cantoniensis Lour.	Spiraea cantoniensis Lour.	3026906	FUZZY	91	ACCEPTED	SPECIES	Plantae	Tracheophyta	Magnoliopsida	Rosales	Rosaceae	Spiraea	Spiraea cantoniensis	Spiraea cantoniensis Lour.
3	Spirodela polyrhiza (L.) Schleid.	Spirodela polyrhiza (L.) Schleid.	4097481	EXACT	100	ACCEPTED	SPECIES	Plantae	Tracheophyta	Liliopsida	Alismatales	Araceae	Spirodela	Spirodela polyrhiza	Spirodela polyrhiza (L.) Schleid.
3	Stellaria media (L.) Vill.	Stellaria media (L.) Vill.	5384604	EXACT	100	ACCEPTED	SPECIES	Plantae	Tracheophyta	Magnoliopsida	Caryophyllales	Caryophyllaceae	Stellaria	Stellaria media	Stellaria media (L.) Vill.
3	Stillingia sylvatica Garden ex L.	Stillingia sylvatica L.	3055154	EXACT	100	ACCEPTED	SPECIES	Plantae	Tracheophyta	Magnoliopsida	Malpighiales	Euphorbiaceae	Stillingia	Stillingia sylvatica	Stillingia sylvatica L.
3	Stipulicida setacea Michx.	Stipulicida setacea Michx.	3085327	EXACT	100	ACCEPTED	SPECIES	Plantae	Tracheophyta	Magnoliopsida	Caryophyllales	Caryophyllaceae	Stipulicida	Stipulicida setacea	Stipulicida setacea Michx.
3	Stylisma patens¬†(Desr.) Myint	Stylisma patens (Desr.) Myint	2928458	EXACT	98	SYNONYM	SPECIES	Plantae	Tracheophyta	Magnoliopsida	Solanales	Convolvulaceae	Stylisma	Stylisma humistrata	Stylisma humistrata Chapm.
3	Stylosanthes biflora (L.) BSP.	Stylosanthes biflora (L.) Britton, Sterns & Poggenb.	2975738	EXACT	89	ACCEPTED	SPECIES	Plantae	Tracheophyta	Magnoliopsida	Fabales	Fabaceae	Stylosanthes	Stylosanthes biflora	Stylosanthes biflora (L.) Britton, Sterns & Poggenb.
3	Styrax americana Lam.	Styrax americanus Lam.	5371669	FUZZY	99	ACCEPTED	SPECIES	Plantae	Tracheophyta	Magnoliopsida	Ericales	Styracaceae	Styrax	Styrax americanus	Styrax americanus Lam.
3	Symphyotrichum concolor¬†(L.) G.L. Nesom	Symphyotrichum concolor (L.) G.L.Nesom	3151497	EXACT	98	ACCEPTED	SPECIES	Plantae	Tracheophyta	Magnoliopsida	Asterales	Asteraceae	Symphyotrichum	Symphyotrichum concolor	Symphyotrichum concolor (L.) G.L.Nesom
3	Symphyotrichum pilosum var. pilosum¬†(Willd.) G.L. Nesom	Symphyotrichum pilosum var. pilosum	4273851	EXACT	98	ACCEPTED	VARIETY	Plantae	Tracheophyta	Magnoliopsida	Asterales	Asteraceae	Symphyotrichum	Symphyotrichum pilosum	Symphyotrichum pilosum (Willd.) G.L.Nesom
3	Aster vimineus Lam.	Aster L.	3093921	EXACT	92	ACCEPTED	GENUS	Plantae	Tracheophyta	Magnoliopsida	Asterales	Asteraceae	Aster	Symphyotrichum racemosum	Symphyotrichum racemosum (Elliott) G.L.Nesom
3	Symplocos tinctoria (L.) L'Her.	Symplocos tinctoria L'H√©r.	3032999	EXACT	100	ACCEPTED	SPECIES	Plantae	Tracheophyta	Magnoliopsida	Ericales	Symplocaceae	Symplocos	Symplocos tinctoria	Symplocos tinctoria L'H√©r.
3	Syngonanthus flavidulus (Michx.) Ruhl. in Engler	Syngonanthus flavidulus Ruhland	2689846	EXACT	100	ACCEPTED	SPECIES	Plantae	Tracheophyta	Liliopsida	Poales	Eriocaulaceae	Syngonanthus	Syngonanthus flavidulus	Syngonanthus flavidulus Ruhland
3	Taraxacum officinale¬†F.H. Wigg. eg Weber	Taraxacum officinale F.H.Wigg.	5394163	HIGHERRANK	97	ACCEPTED	SPECIES	Plantae	Tracheophyta	Magnoliopsida	Asterales	Asteraceae	Taraxacum	Taraxacum officinale	Taraxacum officinale F.H.Wigg.
3	Taxodium ascendens¬†Brongn.	Taxodium ascendens Brongn.	2684203	EXACT	98	SYNONYM	SPECIES	Plantae	Tracheophyta	Pinopsida	Pinales	Cupressaceae	Taxodium	Taxodium distichum	Taxodium distichum Rich.
3	Taxodium distichum¬†(L.) Rich.	Taxodium distichum Rich.	2684191	EXACT	97	ACCEPTED	SPECIES	Plantae	Tracheophyta	Pinopsida	Pinales	Cupressaceae	Taxodium	Taxodium distichum	Taxodium distichum Rich.
3	Tephrosia florida (Dietr.) Wood	Tephrosia florida (F.Dietr.) Alph.Wood	5342168	EXACT	100	ACCEPTED	SPECIES	Plantae	Tracheophyta	Magnoliopsida	Fabales	Fabaceae	Tephrosia	Tephrosia florida	Tephrosia florida (F.Dietr.) Alph.Wood
3	Tephrosia virginiana (L.) Pers.	Tephrosia virginiana (L.) Pers.	5342304	EXACT	100	ACCEPTED	SPECIES	Plantae	Tracheophyta	Magnoliopsida	Fabales	Fabaceae	Tephrosia	Tephrosia virginiana	Tephrosia virginiana (L.) Pers.
3	Thaspium barbinode¬†(Michx.) Nutt.	Thaspium barbinode Nutt.	3034875	EXACT	98	ACCEPTED	SPECIES	Plantae	Tracheophyta	Magnoliopsida	Apiales	Apiaceae	Thaspium	Thaspium barbinode	Thaspium barbinode Nutt.
3	Tillandsia usneoides L.	Tillandsia usneoides (L.) L.	2695149	EXACT	100	ACCEPTED	SPECIES	Plantae	Tracheophyta	Liliopsida	Poales	Bromeliaceae	Tillandsia	Tillandsia usneoides	Tillandsia usneoides (L.) L.
3	Toxicodendron toxicarium (Salisb.) Gillis	Toxicodendron Mill.	8686559	EXACT	94	ACCEPTED	GENUS	Plantae	Tracheophyta	Magnoliopsida	Sapindales	Anacardiaceae	Toxicodendron	Toxicodendron pubescens	Toxicodendron pubescens Mill.
3	Toxicodendron radicans¬†(L.) Kuntze	Toxicodendron radicans (L.) Kuntze	3190628	EXACT	98	ACCEPTED	SPECIES	Plantae	Tracheophyta	Magnoliopsida	Sapindales	Anacardiaceae	Toxicodendron	Toxicodendron radicans	Toxicodendron radicans (L.) Kuntze
3	Toxicodendron vernix¬†(L.) Kuntze	Toxicodendron vernix Kuntze	3190626	EXACT	97	ACCEPTED	SPECIES	Plantae	Tracheophyta	Magnoliopsida	Sapindales	Anacardiaceae	Toxicodendron	Toxicodendron vernix	Toxicodendron vernix Kuntze
3	Tradescantia hirsutiflora Bush	Tradescantia hirsutiflora Bush	2765258	EXACT	100	ACCEPTED	SPECIES	Plantae	Tracheophyta	Liliopsida	Commelinales	Commelinaceae	Tradescantia	Tradescantia hirsutiflora	Tradescantia hirsutiflora Bush
3	Triadenum walteri (Gmel.) Gl.	Triadenum walteri (F.Gmel.) Gleason	3189582	EXACT	100	ACCEPTED	SPECIES	Plantae	Tracheophyta	Magnoliopsida	Malpighiales	Hypericaceae	Triadenum	Triadenum walteri	Triadenum walteri (F.Gmel.) Gleason
3	Trichostema dichotomum L.	Trichostema dichotomum L.	2926665	EXACT	100	ACCEPTED	SPECIES	Plantae	Tracheophyta	Magnoliopsida	Lamiales	Lamiaceae	Trichostema	Trichostema dichotomum	Trichostema dichotomum L.
3	Trichostema setaceum Houtt.	Trichostema setaceum Houtt.	2926662	EXACT	100	ACCEPTED	SPECIES	Plantae	Tracheophyta	Magnoliopsida	Lamiales	Lamiaceae	Trichostema	Trichostema setaceum	Trichostema setaceum Houtt.
3	Tridens flavus (L.) Hitchc.	Tridens flavus Hitchc.	5289648	EXACT	100	ACCEPTED	SPECIES	Plantae	Tracheophyta	Liliopsida	Poales	Poaceae	Tridens	Tridens flavus	Tridens flavus Hitchc.
3	Triodanis perfoliata (L.) Nieuwl.	Triodanis perfoliata Nieuwl.	3167003	EXACT	100	ACCEPTED	SPECIES	Plantae	Tracheophyta	Magnoliopsida	Asterales	Campanulaceae	Triodanis	Triodanis perfoliata	Triodanis perfoliata Nieuwl.
3	Triplasis americana Beauv.	Triplasis americana P.Beauv.	2706385	EXACT	100	ACCEPTED	SPECIES	Plantae	Tracheophyta	Liliopsida	Poales	Poaceae	Triplasis	Triplasis americana	Triplasis americana P.Beauv.
3	Typha latifolia L.	Typha latifolia L.	5289423	EXACT	100	ACCEPTED	SPECIES	Plantae	Tracheophyta	Liliopsida	Poales	Typhaceae	Typha	Typha latifolia	Typha latifolia L.
3	Ulmus alata Michx.	Ulmus alata Michx.	5361878	EXACT	100	ACCEPTED	SPECIES	Plantae	Tracheophyta	Magnoliopsida	Rosales	Ulmaceae	Ulmus	Ulmus alata	Ulmus alata Michx.
3	Utricularia biflora Lam.	Utricularia biflora Lam.	3172408	EXACT	100	SYNONYM	SPECIES	Plantae	Tracheophyta	Magnoliopsida	Lamiales	Lentibulariaceae	Utricularia	Utricularia gibba	Utricularia gibba L.
3	Utricularia fibrosa Walt.	Utricularia fibrosa Walt.	7863322	EXACT	100	SYNONYM	SPECIES	Plantae	Tracheophyta	Magnoliopsida	Lamiales	Lentibulariaceae	Utricularia	Utricularia gibba	Utricularia gibba L.
3	Utricularia inflata Walt.	Utricularia inflata Walter	3172442	EXACT	100	ACCEPTED	SPECIES	Plantae	Tracheophyta	Magnoliopsida	Lamiales	Lentibulariaceae	Utricularia	Utricularia inflata	Utricularia inflata Walter
3	Utricularia purpurea Walt.	Utricularia purpurea Walter	3172399	EXACT	100	ACCEPTED	SPECIES	Plantae	Tracheophyta	Magnoliopsida	Lamiales	Lentibulariaceae	Utricularia	Utricularia purpurea	Utricularia purpurea Walter
3	Vaccinium arboreum Marsh.	Vaccinium arboreum Marshall	2882828	EXACT	100	ACCEPTED	SPECIES	Plantae	Tracheophyta	Magnoliopsida	Ericales	Ericaceae	Vaccinium	Vaccinium arboreum	Vaccinium arboreum Marshall
3	Vaccinium elliottii Chapm.	Vaccinium elliottii Chapm.	2882911	EXACT	100	ACCEPTED	SPECIES	Plantae	Tracheophyta	Magnoliopsida	Ericales	Ericaceae	Vaccinium	Vaccinium elliottii	Vaccinium elliottii Chapm.
3	Vaccinium formosum Andr.	Vaccinium formosum Andrews	2882935	EXACT	100	ACCEPTED	SPECIES	Plantae	Tracheophyta	Magnoliopsida	Ericales	Ericaceae	Vaccinium	Vaccinium formosum	Vaccinium formosum Andrews
3	Vaccinium fuscatum Ait.	Vaccinium fuscatum Aiton	2882965	EXACT	100	ACCEPTED	SPECIES	Plantae	Tracheophyta	Magnoliopsida	Ericales	Ericaceae	Vaccinium	Vaccinium fuscatum	Vaccinium fuscatum Aiton
3	Vaccinium x maranum Wats. proto species (V. formosum x fuscatum)			NONE	100									Vaccinium hybrid	Vaccinium L.
3	Vaccinium myrsinites Lam.	Vaccinium myrsinites Lam.	2882937	EXACT	100	ACCEPTED	SPECIES	Plantae	Tracheophyta	Magnoliopsida	Ericales	Ericaceae	Vaccinium	Vaccinium myrsinites	Vaccinium myrsinites Lam.
3	Vaccinium stamineum L. var. staminium	Vaccinium stamineum var. stamineum	7328012	FUZZY	94	SYNONYM	VARIETY	Plantae	Tracheophyta	Magnoliopsida	Ericales	Ericaceae	Vaccinium	Vaccinium stamineum	Vaccinium stamineum L.
3	Vaccinium tenellum Ait.	Vaccinium tenellum W.T.Aiton	2882847	EXACT	100	ACCEPTED	SPECIES	Plantae	Tracheophyta	Magnoliopsida	Ericales	Ericaceae	Vaccinium	Vaccinium tenellum	Vaccinium tenellum W.T.Aiton
3	Verbascum thapsus L.	Verbascum thapsus L.	3171949	EXACT	100	ACCEPTED	SPECIES	Plantae	Tracheophyta	Magnoliopsida	Lamiales	Scrophulariaceae	Verbascum	Verbascum thapsus	Verbascum thapsus L.
3	Stylodon carneus (Medic.) Moldenke	Stylodon carneus (Medik.) Moldenke	5341122	EXACT	100	SYNONYM	SPECIES	Plantae	Tracheophyta	Magnoliopsida	Lamiales	Verbenaceae	Verbena	Verbena carnea	Verbena carnea Medik.
3	Vernonia angustifolia¬†Michx.	Vernonia angustifolia Michx.	7725720	EXACT	97	ACCEPTED	SPECIES	Plantae	Tracheophyta	Magnoliopsida	Asterales	Asteraceae	Vernonia	Vernonia angustifolia	Vernonia angustifolia Michx.
3	Viburnum nudum L.	Viburnum nudum L.	2888627	EXACT	100	ACCEPTED	SPECIES	Plantae	Tracheophyta	Magnoliopsida	Dipsacales	Adoxaceae	Viburnum	Viburnum nudum	Viburnum nudum L.
3	Viola primulifolia L.	Viola primulifolia L.	8215820	EXACT	100	ACCEPTED	SPECIES	Plantae	Tracheophyta	Magnoliopsida	Malpighiales	Violaceae	Viola	Viola primulifolia	Viola primulifolia L.
3	Viola sororia Willd.	Viola sororia Willd.	5331238	EXACT	100	ACCEPTED	SPECIES	Plantae	Tracheophyta	Magnoliopsida	Malpighiales	Violaceae	Viola	Viola sororia	Viola sororia Willd.
3	Vitis cineria Engelm. ex Millard	Vitis cinerea (Engelm.) Millardet	5372379	FUZZY	98	ACCEPTED	SPECIES	Plantae	Tracheophyta	Magnoliopsida	Vitales	Vitaceae	Vitis	Vitis cinerea	Vitis cinerea (Engelm.) Millardet
3	Vitis rotundifolia Michx.	Vitis rotundifolia Michx.	5372394	EXACT	100	ACCEPTED	SPECIES	Plantae	Tracheophyta	Magnoliopsida	Vitales	Vitaceae	Vitis	Vitis rotundifolia	Vitis rotundifolia Michx.
3	Vulpia sciurea Nutt.	Vulpia sciurea (Nutt.) Henrard	5289593	EXACT	82	SYNONYM	SPECIES	Plantae	Tracheophyta	Liliopsida	Poales	Poaceae	Vulpia	Vulpia elliotea	Vulpia elliotea (Raf.) Fernald
3	Wahlenbergia marginata (Thunb.) A. DC.	Wahlenbergia marginata A.DC.	5413733	EXACT	100	ACCEPTED	SPECIES	Plantae	Tracheophyta	Magnoliopsida	Asterales	Campanulaceae	Wahlenbergia	Wahlenbergia marginata	Wahlenbergia marginata A.DC.
3	Wisteria frutescens (L.) Poir.	Wisteria frutescens (L.) Poir.	2977310	EXACT	100	ACCEPTED	SPECIES	Plantae	Tracheophyta	Magnoliopsida	Fabales	Fabaceae	Wisteria	Wisteria frutescens	Wisteria frutescens (L.) Poir.
3	Wisteria sinensis (Sims) Sweet	Wisteria sinensis Sweet	2977331	EXACT	100	ACCEPTED	SPECIES	Plantae	Tracheophyta	Magnoliopsida	Fabales	Fabaceae	Wisteria	Wisteria sinensis	Wisteria sinensis Sweet
3	Wolffiella floridana (J. D. Sm.) Thomps.	Wolffiella floridana (J.D.Sm.) C.H.Thomps.	5330064	EXACT	100	SYNONYM	SPECIES	Plantae	Tracheophyta	Liliopsida	Alismatales	Araceae	Wolffiella	Wolffiella gladiata	Wolffiella gladiata Hegelm.
3	Xanthium strumarium.¬†var.¬†glabratum¬†(DC.)¬†Cronq	Xanthium strumarium L.	3089154	EXACT	98	ACCEPTED	SPECIES	Plantae	Tracheophyta	Magnoliopsida	Asterales	Asteraceae	Xanthium	Xanthium strumarium	Xanthium strumarium L.
3	Xyris ambigua Beyr.	Xyris ambigua Beyrich	8702672	EXACT	100	DOUBTFUL	SPECIES	Plantae	Tracheophyta	Liliopsida	Poales	Xyridaceae	Xyris	Xyris ambigua	Xyris ambigua Beyr. ex Kunth
3	Xyris flabelliformis. Chapm.	Xyris flabelliformis Chapm.	2692843	EXACT	100	ACCEPTED	SPECIES	Plantae	Tracheophyta	Liliopsida	Poales	Xyridaceae	Xyris	Xyris flabelliformis	Xyris flabelliformis Chapm.
3	Xyris jupicai Rich.	Xyris jupicai Rich.	2692758	EXACT	100	ACCEPTED	SPECIES	Plantae	Tracheophyta	Liliopsida	Poales	Xyridaceae	Xyris	Xyris jupicai	Xyris jupicai Rich.
3	Yucca flaccida Haw.	Yucca flaccida Haw.	2775530	EXACT	100	ACCEPTED	SPECIES	Plantae	Tracheophyta	Liliopsida	Asparagales	Asparagaceae	Yucca	Yucca flaccida	Yucca flaccida Haw.
4	Acalypha gracilens Gray	Acalypha gracilens A.Gray	3056054	EXACT	100	ACCEPTED	SPECIES	Plantae	Tracheophyta	Magnoliopsida	Malpighiales	Euphorbiaceae	Acalypha	Acalypha gracilens	Acalypha gracilens A.Gray
4	Acalypha rhomboidea Raf.	Acalypha rhomboidea Raf.	3056384	EXACT	100	SYNONYM	SPECIES	Plantae	Tracheophyta	Magnoliopsida	Malpighiales	Euphorbiaceae	Acalypha	Acalypha virginica	Acalypha virginica L.
4	Acer barbatum Michaux	Acer barbatum Michx.	3189871	EXACT	100	ACCEPTED	SPECIES	Plantae	Tracheophyta	Magnoliopsida	Sapindales	Sapindaceae	Acer	Acer barbatum	Acer barbatum Michx.
4	Acer leucoderme Small	Acer leucoderme Small	3189849	EXACT	100	ACCEPTED	SPECIES	Plantae	Tracheophyta	Magnoliopsida	Sapindales	Sapindaceae	Acer	Acer leucoderme	Acer leucoderme Small
4	Acer negundo L.	Acer negundo L.	3189866	EXACT	100	ACCEPTED	SPECIES	Plantae	Tracheophyta	Magnoliopsida	Sapindales	Sapindaceae	Acer	Acer negundo	Acer negundo L.
4	Acer rubrum L.	Acer rubrum L.	3189883	EXACT	100	ACCEPTED	SPECIES	Plantae	Tracheophyta	Magnoliopsida	Sapindales	Sapindaceae	Acer	Acer rubrum	Acer rubrum L.
4	Achillea millefolium L.	Achillea millefolium L.	3120060	EXACT	100	ACCEPTED	SPECIES	Plantae	Tracheophyta	Magnoliopsida	Asterales	Asteraceae	Achillea	Achillea millefolium	Achillea millefolium L.
4	Aesculus sylvatica Bartram	Aesculus sylvatica W.Bartram	3189816	EXACT	100	ACCEPTED	SPECIES	Plantae	Tracheophyta	Magnoliopsida	Sapindales	Sapindaceae	Aesculus	Aesculus sylvatica	Aesculus sylvatica W.Bartram
4	Agalinis purpurea (L.) Pennell	Agalinis purpurea Pennell	3171284	EXACT	100	ACCEPTED	SPECIES	Plantae	Tracheophyta	Magnoliopsida	Lamiales	Orobanchaceae	Agalinis	Agalinis purpurea	Agalinis purpurea Pennell
4	Agalinis tenuifolia (Vahl) Raf.	Agalinis tenuifolia Raf.	3171226	EXACT	100	ACCEPTED	SPECIES	Plantae	Tracheophyta	Magnoliopsida	Lamiales	Orobanchaceae	Agalinis	Agalinis tenuifolia	Agalinis tenuifolia Raf.
4	Polianthes virginica (L.) Shinners	Polianthes virginica (L.) Shinners	2771761	EXACT	100	SYNONYM	SPECIES	Plantae	Tracheophyta	Liliopsida	Asparagales	Asparagaceae	Agave	Agave virginica	Agave virginica L.
4	Ageratina altissima (L.) King & Robinson	Ageratina altissima (L.) R.M.King & H.Rob.	5400552	EXACT	100	ACCEPTED	SPECIES	Plantae	Tracheophyta	Magnoliopsida	Asterales	Asteraceae	Ageratina	Ageratina altissima	Ageratina altissima (L.) R.M.King & H.Rob.
4	Ageratina aromatica (L.) Spach	Ageratina aromatica Spach	5400300	EXACT	100	ACCEPTED	SPECIES	Plantae	Tracheophyta	Magnoliopsida	Asterales	Asteraceae	Ageratina	Ageratina aromatica	Ageratina aromatica Spach
4	Agrimonia microcarpa Walroth	Agrimonia microcarpa Wallr.	3002129	EXACT	88	ACCEPTED	SPECIES	Plantae	Tracheophyta	Magnoliopsida	Rosales	Rosaceae	Agrimonia	Agrimonia microcarpa	Agrimonia microcarpa Wallr.
4	Agrimonia pubescens Walroth	Agrimonia pubescens Wallr.	3001959	EXACT	88	ACCEPTED	SPECIES	Plantae	Tracheophyta	Magnoliopsida	Rosales	Rosaceae	Agrimonia	Agrimonia pubescens	Agrimonia pubescens Wallr.
4	Aira elegans Willd. ex Gaudin	Aira elegans Willd. ex Gaudin	7410041	EXACT	100	SYNONYM	SPECIES	Plantae	Tracheophyta	Liliopsida	Poales	Poaceae	Aira	Aira elegans	Aira elegans Willd. ex Roem. & Schult.
4	Albizia julibrissin Durazzini	Albizia julibrissin Durazz.	2972983	EXACT	100	ACCEPTED	SPECIES	Plantae	Tracheophyta	Magnoliopsida	Fabales	Fabaceae	Albizia	Albizia julibrissin	Albizia julibrissin Durazz.
4	Alisma subcordatum Raf.	Alisma subcordatum Raf.	2865181	EXACT	100	ACCEPTED	SPECIES	Plantae	Tracheophyta	Liliopsida	Alismatales	Alismataceae	Alisma	Alisma subcordatum	Alisma subcordatum Raf.
4	Allium canadense L.	Allium canadense L.	2855611	EXACT	100	ACCEPTED	SPECIES	Plantae	Tracheophyta	Liliopsida	Asparagales	Amaryllidaceae	Allium	Allium canadense	Allium canadense L.
4	Alnus serrulata (Aiton) Willd.	Alnus serrulata Willd.	2876528	EXACT	100	ACCEPTED	SPECIES	Plantae	Tracheophyta	Magnoliopsida	Fagales	Betulaceae	Alnus	Alnus serrulata	Alnus serrulata Willd.
4	Ambrosia artemisiifolia L.	Ambrosia artemisiifolia L.	8002952	EXACT	100	ACCEPTED	SPECIES	Plantae	Tracheophyta	Magnoliopsida	Asterales	Asteraceae	Ambrosia	Ambrosia artemisiifolia	Ambrosia artemisiifolia L.
4	Ambrosia trifida L.	Ambrosia trifida L.	3110588	EXACT	100	ACCEPTED	SPECIES	Plantae	Tracheophyta	Magnoliopsida	Asterales	Asteraceae	Ambrosia	Ambrosia trifida	Ambrosia trifida L.
4	Amphicarpaea bracteata (L.) Fernald	Amphicarpaea bracteata (L.) Fernald	2960161	EXACT	100	ACCEPTED	SPECIES	Plantae	Tracheophyta	Magnoliopsida	Fabales	Fabaceae	Amphicarpaea	Amphicarpaea bracteata	Amphicarpaea bracteata (L.) Fernald
4	Amsonia tabernaemontana Walter	Amsonia tabernaemontana Walter	3169689	EXACT	100	ACCEPTED	SPECIES	Plantae	Tracheophyta	Magnoliopsida	Gentianales	Apocynaceae	Amsonia	Amsonia tabernaemontana	Amsonia tabernaemontana Walter
4	Andropogon glomeratus	Andropogon glomeratus (Walter) Britton, Sterns & Poggenb.	2706097	EXACT	100	ACCEPTED	SPECIES	Plantae	Tracheophyta	Liliopsida	Poales	Poaceae	Andropogon	Andropogon glomeratus	Andropogon glomeratus (Walter) Britton, Sterns & Poggenb.
4	Andropogon ternarius Michaux	Andropogon ternarius Michx.	2706082	EXACT	100	ACCEPTED	SPECIES	Plantae	Tracheophyta	Liliopsida	Poales	Poaceae	Andropogon	Andropogon ternarius	Andropogon ternarius Michx.
4	Anemone quinquefolia L.	Anemone quinquefolia L.	3033250	EXACT	100	ACCEPTED	SPECIES	Plantae	Tracheophyta	Magnoliopsida	Ranunculales	Ranunculaceae	Anemone	Anemone quinquefolia	Anemone quinquefolia L.
4	Anemone virginiana L.	Anemone virginiana L.	3033255	EXACT	100	ACCEPTED	SPECIES	Plantae	Tracheophyta	Magnoliopsida	Ranunculales	Ranunculaceae	Anemone	Anemone virginiana	Anemone virginiana L.
4	Angelica venenosa (Greenway) Fernald	Angelica venenosa (Greenway) Fernald	5371819	EXACT	100	ACCEPTED	SPECIES	Plantae	Tracheophyta	Magnoliopsida	Apiales	Apiaceae	Angelica	Angelica venenosa	Angelica venenosa (Greenway) Fernald
4	Antennaria plantaginifolia (L.) Richardson	Antennaria plantaginifolia (L.) Richardson, 1823	5385473	EXACT	100	DOUBTFUL	SPECIES	Plantae	Tracheophyta	Magnoliopsida	Asterales	Asteraceae	Antennaria	Antennaria plantaginifolia	Antennaria plantaginifolia Hook.
4	Anthoxanthum odoratum L.	Anthoxanthum odoratum L.	2705975	EXACT	100	ACCEPTED	SPECIES	Plantae	Tracheophyta	Liliopsida	Poales	Poaceae	Anthoxanthum	Anthoxanthum odoratum	Anthoxanthum odoratum L.
4	Apocynum cannabinum L.	Apocynum cannabinum L.	3169790	EXACT	100	ACCEPTED	SPECIES	Plantae	Tracheophyta	Magnoliopsida	Gentianales	Apocynaceae	Apocynum	Apocynum cannabinum	Apocynum cannabinum L.
4	Arabidopsis thaliana (L.) Heynh.	Arabidopsis thaliana (L.) Heynh.	3052436	EXACT	100	ACCEPTED	SPECIES	Plantae	Tracheophyta	Magnoliopsida	Brassicales	Brassicaceae	Arabidopsis	Arabidopsis thaliana	Arabidopsis thaliana (L.) Heynh.
4	Aralia spinosa L.	Aralia spinosa L.	3036972	EXACT	100	ACCEPTED	SPECIES	Plantae	Tracheophyta	Magnoliopsida	Apiales	Araliaceae	Aralia	Aralia spinosa	Aralia spinosa L.
4	Arenaria serpyllifolia L.	Arenaria serpyllifolia L.	8089871	EXACT	100	ACCEPTED	SPECIES	Plantae	Tracheophyta	Magnoliopsida	Caryophyllales	Caryophyllaceae	Arenaria	Arenaria serpyllifolia	Arenaria serpyllifolia L.
4	Arisaema triphyllum (L.) Shott	Arisaema triphyllum (L.) Schott	2867316	EXACT	89	ACCEPTED	SPECIES	Plantae	Tracheophyta	Liliopsida	Alismatales	Araceae	Arisaema	Arisaema triphyllum	Arisaema triphyllum (L.) Schott
4	Arnoglossum atriplicifolium (L.) H. Robins	Arnoglossum atriplicifolium (L.) H.Rob.	5390070	EXACT	100	ACCEPTED	SPECIES	Plantae	Tracheophyta	Magnoliopsida	Asterales	Asteraceae	Arnoglossum	Arnoglossum atriplicifolium	Arnoglossum atriplicifolium (L.) H.Rob.
4	Arthraxon hispidus (Thunb.) Makino var. cryptherus (Hac)	Arthraxon hispidus var. cryptatherus (Hack.) Honda	5290204	FUZZY	96	SYNONYM	VARIETY	Plantae	Tracheophyta	Liliopsida	Poales	Poaceae	Arthraxon	Arthraxon hispidus	Arthraxon hispidus (Thunb.) Makino
4	Arundinaria gigantea (Walter) Muhl.	Arundinaria gigantea (Walter) Muhl.	2705964	EXACT	100	ACCEPTED	SPECIES	Plantae	Tracheophyta	Liliopsida	Poales	Poaceae	Arundinaria	Arundinaria gigantea	Arundinaria gigantea (Walter) Muhl.
4	Asclepias amplexicaulis Smith	Asclepias amplexicaulis Sm.	3170332	EXACT	100	ACCEPTED	SPECIES	Plantae	Tracheophyta	Magnoliopsida	Gentianales	Apocynaceae	Asclepias	Asclepias amplexicaulis	Asclepias amplexicaulis Sm.
4	Asclepias tuberosa L.	Asclepias tuberosa L.	3170305	EXACT	100	ACCEPTED	SPECIES	Plantae	Tracheophyta	Magnoliopsida	Gentianales	Apocynaceae	Asclepias	Asclepias tuberosa	Asclepias tuberosa L.
4	Asclepias variegata L.	Asclepias variegata L.	3170272	EXACT	100	ACCEPTED	SPECIES	Plantae	Tracheophyta	Magnoliopsida	Gentianales	Apocynaceae	Asclepias	Asclepias variegata	Asclepias variegata L.
4	Asimina parviflora (Michx.) Dunal	Asimina parviflora Dunal	3158051	EXACT	100	ACCEPTED	SPECIES	Plantae	Tracheophyta	Magnoliopsida	Magnoliales	Annonaceae	Asimina	Asimina parviflora	Asimina parviflora Dunal
4	Asimina triloba (L.) Dunal	Asimina triloba Dunal	3158040	EXACT	100	ACCEPTED	SPECIES	Plantae	Tracheophyta	Magnoliopsida	Magnoliales	Annonaceae	Asimina	Asimina triloba	Asimina triloba Dunal
4	Asplenium montanum Willd.	Asplenium montanum Willd.	2650651	EXACT	100	ACCEPTED	SPECIES	Plantae	Tracheophyta	Polypodiopsida	Polypodiales	Aspleniaceae	Asplenium	Asplenium montanum	Asplenium montanum Willd.
4	Asplenium platyneuron (L.) Oakes	Asplenium platyneuron (L.) Oakes	8010341	EXACT	100	SYNONYM	SPECIES	Plantae	Tracheophyta	Polypodiopsida	Polypodiales	Aspleniaceae	Asplenium	Asplenium platyneuron	Asplenium platyneuron (L.) Britton, Sterns & Poggenb.
4	Athyrium felix-femina (L.) Roth var. aspleniodes (Mich.) Farwell	Athyrium filix-femina var. asplenioides (Michx.) Farw.	5643872	FUZZY	99	SYNONYM	VARIETY	Plantae	Tracheophyta	Polypodiopsida	Polypodiales	Athyriaceae	Athyrium	Athyrium asplenioides	Athyrium asplenioides (Michx.) Desv.
4	Aureolaria pectinata (Nutt.) Pennell	Aureolaria pectinata (Nutt.) Pennell	3170762	EXACT	100	ACCEPTED	SPECIES	Plantae	Tracheophyta	Magnoliopsida	Lamiales	Orobanchaceae	Aureolaria	Aureolaria pectinata	Aureolaria pectinata (Nutt.) Pennell
4	Aureolaria virginica (L.) Pennell	Aureolaria virginica Pennell	3170773	EXACT	100	ACCEPTED	SPECIES	Plantae	Tracheophyta	Magnoliopsida	Lamiales	Orobanchaceae	Aureolaria	Aureolaria virginica	Aureolaria virginica Pennell
4	Baptisia alba (L.) R. Brown	Baptisia alba R.Br.	7629935	EXACT	100	DOUBTFUL	SPECIES	Plantae	Tracheophyta	Magnoliopsida	Fabales	Fabaceae	Baptisia	Baptisia alba	Baptisia alba (L.) Vent.
4	Barbarea verna (Miller) Ascherson	Barbarea verna (Mill.) Asch.	5374672	EXACT	100	ACCEPTED	SPECIES	Plantae	Tracheophyta	Magnoliopsida	Brassicales	Brassicaceae	Barbarea	Barbarea verna	Barbarea verna (Mill.) Asch.
4	Betula nigra L.	Betula nigra L.	5331532	EXACT	100	ACCEPTED	SPECIES	Plantae	Tracheophyta	Magnoliopsida	Fagales	Betulaceae	Betula	Betula nigra	Betula nigra L.
4	Bidens bipinnata L.	Bidens bipinnata L.	5389402	EXACT	100	ACCEPTED	SPECIES	Plantae	Tracheophyta	Magnoliopsida	Asterales	Asteraceae	Bidens	Bidens bipinnata	Bidens bipinnata L.
4	Bidens mitis (Michaux) Sherff	Bidens mitis (Michx.) Sherff	5392019	EXACT	100	ACCEPTED	SPECIES	Plantae	Tracheophyta	Magnoliopsida	Asterales	Asteraceae	Bidens	Bidens mitis	Bidens mitis (Michx.) Sherff
4	Bidens polylepis Blake	Bidens polylepis S.F.Blake	5391933	EXACT	100	ACCEPTED	SPECIES	Plantae	Tracheophyta	Magnoliopsida	Asterales	Asteraceae	Bidens	Bidens polylepis	Bidens polylepis S.F.Blake
4	Bignonia capreolata L.	Bignonia capreolata L.	3172516	EXACT	100	ACCEPTED	SPECIES	Plantae	Tracheophyta	Magnoliopsida	Lamiales	Bignoniaceae	Bignonia	Bignonia capreolata	Bignonia capreolata L.
4	Blephilia ciliata (L.) Bentham	Blephilia ciliata (L.) Raf. ex Benth.	2926502	EXACT	100	ACCEPTED	SPECIES	Plantae	Tracheophyta	Magnoliopsida	Lamiales	Lamiaceae	Blephilia	Blephilia ciliata	Blephilia ciliata (L.) Raf. ex Benth.
4	Boehmeria cylindrica (L.) Swartz	Boehmeria cylindrica (L.) Sw.	2984345	EXACT	100	ACCEPTED	SPECIES	Plantae	Tracheophyta	Magnoliopsida	Rosales	Urticaceae	Boehmeria	Boehmeria cylindrica	Boehmeria cylindrica (L.) Sw.
4	Botriychium virginianum (L.) Swartz	Botrychium virginianum (L.) Sw.	2650159	FUZZY	95	SYNONYM	SPECIES	Plantae	Tracheophyta	Polypodiopsida	Ophioglossales	Ophioglossaceae	Botrypus	Botrypus virginianus	Botrypus virginianus (L.) Michx.
4	Brachyelytrum erectum (Schreb.) Beauv.	Brachyelytrum erectum (Schreb.) P.Beauv.	8644847	EXACT	100	ACCEPTED	SPECIES	Plantae	Tracheophyta	Liliopsida	Poales	Poaceae	Brachyelytrum	Brachyelytrum erectum	Brachyelytrum erectum (Schreb.) P.Beauv.
4	Bromus commutatus Schrader.	Bromus commutatus Schrad.	2703778	EXACT	100	ACCEPTED	SPECIES	Plantae	Tracheophyta	Liliopsida	Poales	Poaceae	Bromus	Bromus commutatus	Bromus commutatus Schrad.
4	Bromus japonicus.- Thunb.	Bromus japonicus Houtt.	8113508	EXACT	99	ACCEPTED	SPECIES	Plantae	Tracheophyta	Liliopsida	Poales	Poaceae	Bromus	Bromus japonicus	Bromus japonicus Houtt.
4	Bromus purgans L.	Bromus purgans L.	2703645	EXACT	100	SYNONYM	SPECIES	Plantae	Tracheophyta	Liliopsida	Poales	Poaceae	Bromus	Bromus kalmii	Bromus kalmii A.Gray
4	Buglossoides arvense (L.) I. M. Johnst.	Buglossoides arvensis (L.) I.M.Johnst.	2925901	FUZZY	99	ACCEPTED	SPECIES	Plantae	Tracheophyta	Magnoliopsida	Boraginales	Boraginaceae	Buglossoides	Buglossoides arvensis	Buglossoides arvensis (L.) I.M.Johnst.
4	Callicarpa americana L.	Callicarpa americana L.	5341129	EXACT	100	ACCEPTED	SPECIES	Plantae	Tracheophyta	Magnoliopsida	Lamiales	Lamiaceae	Callicarpa	Callicarpa americana	Callicarpa americana L.
4	Calycanthus floridus L. var. floridus	Calycanthus floridus var. floridus	7096664	EXACT	100	ACCEPTED	VARIETY	Plantae	Tracheophyta	Magnoliopsida	Laurales	Calycanthaceae	Calycanthus	Calycanthus floridus	Calycanthus floridus L.
4	Campsis radicans (L.) Seemann	Campsis radicans (L.) Seem.	7613490	EXACT	100	ACCEPTED	SPECIES	Plantae	Tracheophyta	Magnoliopsida	Lamiales	Bignoniaceae	Campsis	Campsis radicans	Campsis radicans (L.) Seem.
4	Capsella bursa-pastoris (L.) Medicus	Capsella bursa-pastoris (L.) Medik.	5375388	EXACT	100	ACCEPTED	SPECIES	Plantae	Tracheophyta	Magnoliopsida	Brassicales	Brassicaceae	Capsella	Capsella bursa-pastoris	Capsella bursa-pastoris (L.) Medik.
4	Cardamine hirsuta L.	Cardamine hirsuta L.	3046258	EXACT	100	ACCEPTED	SPECIES	Plantae	Tracheophyta	Magnoliopsida	Brassicales	Brassicaceae	Cardamine	Cardamine hirsuta	Cardamine hirsuta L.
4	Cardamine parviflora L.	Cardamine parviflora L.	3046092	EXACT	100	ACCEPTED	SPECIES	Plantae	Tracheophyta	Magnoliopsida	Brassicales	Brassicaceae	Cardamine	Cardamine parviflora	Cardamine parviflora L.
4	Carduus nutans L.	Carduus nutans L.	8185959	EXACT	100	ACCEPTED	SPECIES	Plantae	Tracheophyta	Magnoliopsida	Asterales	Asteraceae	Carduus	Carduus nutans	Carduus nutans L.
4	Carex abscondita Mackenzie	Carex abscondita Mack.	2723821	EXACT	100	ACCEPTED	SPECIES	Plantae	Tracheophyta	Liliopsida	Poales	Cyperaceae	Carex	Carex abscondita	Carex abscondita Mack.
4	Carex albolutescens Schweinitz.	Carex albolutescens Schwein.	2723628	EXACT	100	ACCEPTED	SPECIES	Plantae	Tracheophyta	Liliopsida	Poales	Cyperaceae	Carex	Carex albolutescens	Carex albolutescens Schwein.
4	Carex atlantica Bailey ssp. atlantica	Carex atlantica subsp. atlantica	7070267	EXACT	100	ACCEPTED	SUBSPECIES	Plantae	Tracheophyta	Liliopsida	Poales	Cyperaceae	Carex	Carex atlantica	Carex atlantica L.H.Bailey
4	Carex atlantica Bailey ssp. capillacea (Bailey) Reznicek	Carex atlantica subsp. capillacea (L.H.Bailey) Reznicek	2726860	EXACT	100	ACCEPTED	SUBSPECIES	Plantae	Tracheophyta	Liliopsida	Poales	Cyperaceae	Carex	Carex atlantica	Carex atlantica L.H.Bailey
4	Carex bulbostylis Mack.	Carex bulbostylis Mackenzie	2723642	EXACT	100	ACCEPTED	SPECIES	Plantae	Tracheophyta	Liliopsida	Poales	Cyperaceae	Carex	Carex bulbostylis	Carex bulbostylis Mackenzie
4	Carex caroliniana Schweinitz	Carex caroliniana Schwein.	2727906	EXACT	100	ACCEPTED	SPECIES	Plantae	Tracheophyta	Liliopsida	Poales	Cyperaceae	Carex	Carex caroliniana	Carex caroliniana Schwein.
4	Carex cephalophora Muhl. ex Schkuhr.	Carex cephalophora Muhl. ex Schkuhr	7767981	EXACT	100	DOUBTFUL	SPECIES	Plantae	Tracheophyta	Liliopsida	Poales	Cyperaceae	Carex	Carex cephalophora	Carex cephalophora Muhl. ex Willd.
4	Carex crebriflora Wiegand	Carex crebriflora Wieg.	2726157	EXACT	100	ACCEPTED	SPECIES	Plantae	Tracheophyta	Liliopsida	Poales	Cyperaceae	Carex	Carex crebriflora	Carex crebriflora Wieg.
4	Carex crinita Lam. var. crinita	Carex crinita var. crinita	7227182	EXACT	99	ACCEPTED	VARIETY	Plantae	Tracheophyta	Liliopsida	Poales	Cyperaceae	Carex	Carex crinita	Carex crinita Lam.
4	Carex digitalis Willd.	Carex digitalis Willd.	2722156	EXACT	100	ACCEPTED	SPECIES	Plantae	Tracheophyta	Liliopsida	Poales	Cyperaceae	Carex	Carex digitalis	Carex digitalis Willd.
4	Carex flaccosperma Dewey	Carex flaccosperma Dewey	2727069	EXACT	100	ACCEPTED	SPECIES	Plantae	Tracheophyta	Liliopsida	Poales	Cyperaceae	Carex	Carex flaccosperma	Carex flaccosperma Dewey
4	Carex floridana Schweinitz	Carex floridana Schwein. & Torr.	2723124	EXACT	100	ACCEPTED	SPECIES	Plantae	Tracheophyta	Liliopsida	Poales	Cyperaceae	Carex	Carex floridana	Carex floridana Schwein. & Torr.
4	Carex frankii Kunth	Carex frankii Kunth	2722536	EXACT	100	ACCEPTED	SPECIES	Plantae	Tracheophyta	Liliopsida	Poales	Cyperaceae	Carex	Carex frankii	Carex frankii Kunth
4	Carex gigantea Rudge	Carex gigantea Rudge	2728850	EXACT	100	ACCEPTED	SPECIES	Plantae	Tracheophyta	Liliopsida	Poales	Cyperaceae	Carex	Carex gigantea	Carex gigantea Rudge
4	Carex intumescens Rudge	Carex intumescens Rudge	2727755	EXACT	100	ACCEPTED	SPECIES	Plantae	Tracheophyta	Liliopsida	Poales	Cyperaceae	Carex	Carex intumescens	Carex intumescens Rudge
4	Carex laevivaginata (Kukenthal) Mackenzie	Carex laevivaginata (K√ºk.) Mackenzie	8387084	EXACT	100	ACCEPTED	SPECIES	Plantae	Tracheophyta	Liliopsida	Poales	Cyperaceae	Carex	Carex laevivaginata	Carex laevivaginata (K√ºk.) Mackenzie
4	Carex laxiflora Lam.	Carex laxiflora Lam.	2724466	EXACT	100	ACCEPTED	SPECIES	Plantae	Tracheophyta	Liliopsida	Poales	Cyperaceae	Carex	Carex laxiflora	Carex laxiflora Lam.
4	Carex leavenworthii Dewey	Carex leavenworthii Dewey	2725211	EXACT	100	ACCEPTED	SPECIES	Plantae	Tracheophyta	Liliopsida	Poales	Cyperaceae	Carex	Carex leavenworthii	Carex leavenworthii Dewey
4	Carex leptalea Wahlenberg	Carex leptalea Wahlenb.	2729017	EXACT	100	ACCEPTED	SPECIES	Plantae	Tracheophyta	Liliopsida	Poales	Cyperaceae	Carex	Carex leptalea	Carex leptalea Wahlenb.
4	Carex lupulina Willd.	Carex lupulina Muhl. ex Willd.	2727232	EXACT	100	ACCEPTED	SPECIES	Plantae	Tracheophyta	Liliopsida	Poales	Cyperaceae	Carex	Carex lupulina	Carex lupulina Muhl. ex Willd.
4	Carex lurida Wahlenberg	Carex lurida Wahlenb.	2722529	EXACT	100	ACCEPTED	SPECIES	Plantae	Tracheophyta	Liliopsida	Poales	Cyperaceae	Carex	Carex lurida	Carex lurida Wahlenb.
4	Carex nigromarginata Schweinitz	Carex nigromarginata Schwein.	2727797	EXACT	100	ACCEPTED	SPECIES	Plantae	Tracheophyta	Liliopsida	Poales	Cyperaceae	Carex	Carex nigromarginata	Carex nigromarginata Schwein.
4	Carex radiata (Wahlenberg) Dewey	Carex radiata Small	2722811	EXACT	88	ACCEPTED	SPECIES	Plantae	Tracheophyta	Liliopsida	Poales	Cyperaceae	Carex	Carex radiata	Carex radiata Small
4	Carex retroflexa Muhl. ex Schkuhr	Carex retroflexa Muhl. ex Schkuhr	7705692	EXACT	100	DOUBTFUL	SPECIES	Plantae	Tracheophyta	Liliopsida	Poales	Cyperaceae	Carex	Carex retroflexa	Carex retroflexa Muhl. ex Willd.
4	Carex squarrosa L.	Carex squarrosa L.	2728950	EXACT	100	ACCEPTED	SPECIES	Plantae	Tracheophyta	Liliopsida	Poales	Cyperaceae	Carex	Carex squarrosa	Carex squarrosa L.
4	Carex stipata Muhl. ex Willd.	Carex stipata Muhl. ex Willd.	2725605	EXACT	100	ACCEPTED	SPECIES	Plantae	Tracheophyta	Liliopsida	Poales	Cyperaceae	Carex	Carex stipata	Carex stipata Muhl. ex Willd.
4	Carex tribuloides Wahlenberg	Carex tribuloides Wahlenb.	2727891	EXACT	100	ACCEPTED	SPECIES	Plantae	Tracheophyta	Liliopsida	Poales	Cyperaceae	Carex	Carex tribuloides	Carex tribuloides Wahlenb.
4	Carex muhlenbergii Schkuler	Carex muhlenbergii Kunth ex Boott	2728062	EXACT	83	SYNONYM	SPECIES	Plantae	Tracheophyta	Liliopsida	Poales	Cyperaceae	Carex	Carex vulpinoidea	Carex vulpinoidea Michx.
4	Carex vulpinoidea Michaux	Carex vulpinoidea Michx.	2728060	EXACT	100	ACCEPTED	SPECIES	Plantae	Tracheophyta	Liliopsida	Poales	Cyperaceae	Carex	Carex vulpinoidea	Carex vulpinoidea Michx.
4	Carpinus caroliniana Walter	Carpinus caroliniana Walter	2875842	EXACT	100	ACCEPTED	SPECIES	Plantae	Tracheophyta	Magnoliopsida	Fagales	Betulaceae	Carpinus	Carpinus caroliniana	Carpinus caroliniana Walter
4	Carya tomentosa (Poiret) Nuttall	Carya tomentosa (Lam.) Nutt.	3054304	EXACT	100	SYNONYM	SPECIES	Plantae	Tracheophyta	Magnoliopsida	Fagales	Juglandaceae	Carya	Carya alba	Carya alba (L.) Nutt.
4	Carya ovata (Mill) K. Koch	Carya ovata K.Koch	3054296	EXACT	100	ACCEPTED	SPECIES	Plantae	Tracheophyta	Magnoliopsida	Fagales	Juglandaceae	Carya	Carya ovata	Carya ovata K.Koch
4	Carya pallida (Ache) Engler & Graebner	Carya pallida Engl. & Graebn.	3054341	EXACT	100	ACCEPTED	SPECIES	Plantae	Tracheophyta	Magnoliopsida	Fagales	Juglandaceae	Carya	Carya pallida	Carya pallida Engl. & Graebn.
4	Catalpa bignonioides Walter	Catalpa bignonioides Walter	3172615	EXACT	100	ACCEPTED	SPECIES	Plantae	Tracheophyta	Magnoliopsida	Lamiales	Bignoniaceae	Catalpa	Catalpa bignonioides	Catalpa bignonioides Walter
4	Ceanothus americanus L.	Ceanothus americanus L.	3039318	EXACT	100	ACCEPTED	SPECIES	Plantae	Tracheophyta	Magnoliopsida	Rosales	Rhamnaceae	Ceanothus	Ceanothus americanus	Ceanothus americanus L.
4	Celtis occidentalis L.	Celtis occidentalis L.	2984481	EXACT	100	ACCEPTED	SPECIES	Plantae	Tracheophyta	Magnoliopsida	Rosales	Cannabaceae	Celtis	Celtis occidentalis	Celtis occidentalis L.
4	Celtis tenuifolia Nuttall	Celtis tenuifolia Nutt.	2984482	EXACT	100	ACCEPTED	SPECIES	Plantae	Tracheophyta	Magnoliopsida	Rosales	Cannabaceae	Celtis	Celtis tenuifolia	Celtis tenuifolia Nutt.
4	Centrosema virginianum (L.) Bentham	Centrosema virginianum (L.) Benth.	2964906	EXACT	100	ACCEPTED	SPECIES	Plantae	Tracheophyta	Magnoliopsida	Fabales	Fabaceae	Centrosema	Centrosema virginianum	Centrosema virginianum (L.) Benth.
4	Cephalanthus occidentalis L.	Cephalanthus occidentalis L.	2923947	EXACT	100	ACCEPTED	SPECIES	Plantae	Tracheophyta	Magnoliopsida	Gentianales	Rubiaceae	Cephalanthus	Cephalanthus occidentalis	Cephalanthus occidentalis L.
4	Cerastium fontanum Baumg.	Cerastium fontanum Baumg.	3085458	EXACT	100	ACCEPTED	SPECIES	Plantae	Tracheophyta	Magnoliopsida	Caryophyllales	Caryophyllaceae	Cerastium	Cerastium fontanum	Cerastium fontanum Baumg.
4	Cerastium glomeratum Thuiller	Cerastium glomeratum Thuill.	3085440	EXACT	100	ACCEPTED	SPECIES	Plantae	Tracheophyta	Magnoliopsida	Caryophyllales	Caryophyllaceae	Cerastium	Cerastium glomeratum	Cerastium glomeratum Thuill.
4	Cercis canadensis L.	Cercis canadensis L.	5353583	EXACT	100	ACCEPTED	SPECIES	Plantae	Tracheophyta	Magnoliopsida	Fabales	Fabaceae	Cercis	Cercis canadensis	Cercis canadensis L.
4	Chaerophyllum tainturieri Hooker	Chaerophyllum tainturieri Hook.	3034651	EXACT	100	ACCEPTED	SPECIES	Plantae	Tracheophyta	Magnoliopsida	Apiales	Apiaceae	Chaerophyllum	Chaerophyllum tainturieri	Chaerophyllum tainturieri Hook.
4	Chamaecrista fasciculata (Michaux) Greene	Chamaecrista fasciculata (Michx.) Greene	2949728	EXACT	100	ACCEPTED	SPECIES	Plantae	Tracheophyta	Magnoliopsida	Fabales	Fabaceae	Chamaecrista	Chamaecrista fasciculata	Chamaecrista fasciculata (Michx.) Greene
4	Chamaecrista nictitans (L.) Moench var. nictitans	Chamaecrista nictitans var. nictitans	7224476	EXACT	100	ACCEPTED	VARIETY	Plantae	Tracheophyta	Magnoliopsida	Fabales	Fabaceae	Chamaecrista	Chamaecrista nictitans	Chamaecrista nictitans Moench
4	Chamaelirium luteum (L.) Gray	Chamaelirium luteum A.Gray	2741647	EXACT	100	ACCEPTED	SPECIES	Plantae	Tracheophyta	Liliopsida	Liliales	Melanthiaceae	Chamaelirium	Chamaelirium luteum	Chamaelirium luteum A.Gray
4	Chasmanthium latifolium (Michx.) Yates	Chasmanthium latifolium (Michx.) H.O.Yates	2703077	EXACT	100	ACCEPTED	SPECIES	Plantae	Tracheophyta	Liliopsida	Poales	Poaceae	Chasmanthium	Chasmanthium latifolium	Chasmanthium latifolium (Michx.) H.O.Yates
4	Chasmanthium sessilifolium (Poiret) Yates	Chasmanthium sessiliflorum (Poir.) Yates	2703081	FUZZY	99	SYNONYM	SPECIES	Plantae	Tracheophyta	Liliopsida	Poales	Poaceae	Chasmanthium	Chasmanthium laxum	Chasmanthium laxum (L.) H.O.Yates
4	Chelone glabra L.	Chelone glabra L.	5414935	EXACT	100	ACCEPTED	SPECIES	Plantae	Tracheophyta	Magnoliopsida	Lamiales	Plantaginaceae	Chelone	Chelone glabra	Chelone glabra L.
4	Chenopodium album L.	Chenopodium album L.	3083838	EXACT	100	ACCEPTED	SPECIES	Plantae	Tracheophyta	Magnoliopsida	Caryophyllales	Amaranthaceae	Chenopodium	Chenopodium album	Chenopodium album L.
4	Chimaphila maculata (L.) Pursh	Chimaphila maculata Pursh	2888304	EXACT	100	ACCEPTED	SPECIES	Plantae	Tracheophyta	Magnoliopsida	Ericales	Ericaceae	Chimaphila	Chimaphila maculata	Chimaphila maculata Pursh
4	Chionanthus virginicus L.	Chionanthus virginicus L.	3172303	EXACT	100	ACCEPTED	SPECIES	Plantae	Tracheophyta	Magnoliopsida	Lamiales	Oleaceae	Chionanthus	Chionanthus virginicus	Chionanthus virginicus L.
4	Chtysogonum virginianum L.	Chrysogonum virginianum L.	3152026	FUZZY	94	ACCEPTED	SPECIES	Plantae	Tracheophyta	Magnoliopsida	Asterales	Asteraceae	Chrysogonum	Chrysogonum virginianum	Chrysogonum virginianum L.
4	Chrysopsis mariana (L.) Ell.	Chrysopsis mariana (L.) Elliott	5385923	EXACT	100	ACCEPTED	SPECIES	Plantae	Tracheophyta	Magnoliopsida	Asterales	Asteraceae	Chrysopsis	Chrysopsis mariana	Chrysopsis mariana (L.) Elliott
4	Cicuta maculata L.	Cicuta maculata L.	5371867	EXACT	100	ACCEPTED	SPECIES	Plantae	Tracheophyta	Magnoliopsida	Apiales	Apiaceae	Cicuta	Cicuta maculata	Cicuta maculata L.
4	Cinna arundinacea L.	Cinna arundinacea L.	2704847	EXACT	100	ACCEPTED	SPECIES	Plantae	Tracheophyta	Liliopsida	Poales	Poaceae	Cinna	Cinna arundinacea	Cinna arundinacea L.
4	Cirsium altissimum (L.) Spreng.	Cirsium altissimum (L.) Spreng.	8078803	EXACT	100	ACCEPTED	SPECIES	Plantae	Tracheophyta	Magnoliopsida	Asterales	Asteraceae	Cirsium	Cirsium altissimum	Cirsium altissimum (L.) Spreng.
4	Cirsium houidulum Michaux	Cirsium horridulum Michx.	3112777	FUZZY	99	ACCEPTED	SPECIES	Plantae	Tracheophyta	Magnoliopsida	Asterales	Asteraceae	Cirsium	Cirsium horridulum	Cirsium horridulum Michx.
4	Cirsium vulgare (Savi) Tenore	Cirsium vulgare (Savi) Ten.	3112801	EXACT	100	ACCEPTED	SPECIES	Plantae	Tracheophyta	Magnoliopsida	Asterales	Asteraceae	Cirsium	Cirsium vulgare	Cirsium vulgare (Savi) Ten.
4	Clematis crispa L.	Clematis crispa L.	3033593	EXACT	100	ACCEPTED	SPECIES	Plantae	Tracheophyta	Magnoliopsida	Ranunculales	Ranunculaceae	Clematis	Clematis crispa	Clematis crispa L.
4	Clematis virginiana L.	Clematis virginiana L.	3033541	EXACT	100	ACCEPTED	SPECIES	Plantae	Tracheophyta	Magnoliopsida	Ranunculales	Ranunculaceae	Clematis	Clematis virginiana	Clematis virginiana L.
4	Calamintha georgiana (Harper) Shinners	Calamintha georgiana (R.M.Harper) Shinners	5341441	EXACT	100	SYNONYM	SPECIES	Plantae	Tracheophyta	Magnoliopsida	Lamiales	Lamiaceae	Clinopodium	Clinopodium carolinianum	Clinopodium carolinianum Mill.
4	Clitoria mariana L.	Clitoria mariana L.	2946542	EXACT	100	ACCEPTED	SPECIES	Plantae	Tracheophyta	Magnoliopsida	Fabales	Fabaceae	Clitoria	Clitoria mariana	Clitoria mariana L.
4	Cocculus carolinus (L.) DC.	Cocculus carolinus DC.	3033941	EXACT	100	ACCEPTED	SPECIES	Plantae	Tracheophyta	Magnoliopsida	Ranunculales	Menispermaceae	Cocculus	Cocculus carolinus	Cocculus carolinus DC.
4	Panicum anceps Michaux var. anceps	Panicum anceps var. anceps	7324603	EXACT	99	SYNONYM	VARIETY	Plantae	Tracheophyta	Liliopsida	Poales	Poaceae	Coleataenia	Coleataenia anceps	Coleataenia anceps (Michx.) Soreng
4	Panicum rigidulum Nees	Panicum rigidulum Bosc ex Nees	2705137	EXACT	100	SYNONYM	SPECIES	Plantae	Tracheophyta	Liliopsida	Poales	Poaceae	Coleataenia	Coleataenia rigidula	Coleataenia rigidula (Bosc ex Nees) LeBlond
4	Collinsonia verticillata Baldwin ex Ell.	Collinsonia verticillata Baldw. ex Elliott	8045566	EXACT	100	ACCEPTED	SPECIES	Plantae	Tracheophyta	Magnoliopsida	Lamiales	Lamiaceae	Collinsonia	Collinsonia verticillata	Collinsonia verticillata Baldw. ex Elliott
4	Commelina communis L.	Commelina communis L.	2764179	EXACT	100	ACCEPTED	SPECIES	Plantae	Tracheophyta	Liliopsida	Commelinales	Commelinaceae	Commelina	Commelina communis	Commelina communis L.
4	Commelina virginica L.	Commelina virginica L.	2764028	EXACT	100	ACCEPTED	SPECIES	Plantae	Tracheophyta	Liliopsida	Commelinales	Commelinaceae	Commelina	Commelina virginica	Commelina virginica L.
4	Corallorhiza odontorhiza (Willd.) Nuttall	Corallorhiza odontorhiza Nutt.	2797260	EXACT	100	ACCEPTED	SPECIES	Plantae	Tracheophyta	Liliopsida	Asparagales	Orchidaceae	Corallorhiza	Corallorhiza odontorhiza	Corallorhiza odontorhiza Nutt.
4	Coreopsis grandiflora Hogg. var. grandiflora	Coreopsis grandiflora var. grandiflora	4274457	EXACT	99	SYNONYM	VARIETY	Plantae	Tracheophyta	Magnoliopsida	Asterales	Asteraceae	Coreopsis	Coreopsis grandiflora	Coreopsis grandiflora Hogg ex Sw.
4	Coreopsis lanceolata L.	Coreopsis lanceolata L.	3133938	EXACT	100	ACCEPTED	SPECIES	Plantae	Tracheophyta	Magnoliopsida	Asterales	Asteraceae	Coreopsis	Coreopsis lanceolata	Coreopsis lanceolata L.
4	Coreopsis major Walter var. major	Coreopsis major var. major	4206954	EXACT	99	SYNONYM	VARIETY	Plantae	Tracheophyta	Magnoliopsida	Asterales	Asteraceae	Coreopsis	Coreopsis major	Coreopsis major Walter
4	Coreopsis pubescens Ell. var. robusta A. Gray ex. Eames	Coreopsis pubescens var. robusta A.Gray ex Eames	4206391	EXACT	100	SYNONYM	VARIETY	Plantae	Tracheophyta	Magnoliopsida	Asterales	Asteraceae	Coreopsis	Coreopsis pubescens	Coreopsis pubescens Elliott
4	Cornus amomum Miller	Cornus amomum Mill.	3082227	EXACT	100	ACCEPTED	SPECIES	Plantae	Tracheophyta	Magnoliopsida	Cornales	Cornaceae	Cornus	Cornus amomum	Cornus amomum Mill.
4	Cornus florida L.	Cornus florida L.	3082240	EXACT	100	ACCEPTED	SPECIES	Plantae	Tracheophyta	Magnoliopsida	Cornales	Cornaceae	Cornus	Cornus florida	Cornus florida L.
4	Crataegus flabellata (Bose.) K. Koch	Crataegus flabellata (Spach) K.Koch	3014366	EXACT	100	SYNONYM	SPECIES	Plantae	Tracheophyta	Magnoliopsida	Rosales	Rosaceae	Crataegus	Crataegus flabellata	Crataegus flabellata Bosc ex M.Roem.
4	Crataegus flava Aiton	Crataegus flava Aiton	7855454	EXACT	100	ACCEPTED	SPECIES	Plantae	Tracheophyta	Magnoliopsida	Rosales	Rosaceae	Crataegus	Crataegus flava	Crataegus flava Aiton
4	Crataegus uniflora Muenchh	Crataegus uniflora M√ºnchh.	3015389	EXACT	100	ACCEPTED	SPECIES	Plantae	Tracheophyta	Magnoliopsida	Rosales	Rosaceae	Crataegus	Crataegus uniflora	Crataegus uniflora M√ºnchh.
4	Crepis pulchra L.	Crepis pulchra L.	5403272	EXACT	100	ACCEPTED	SPECIES	Plantae	Tracheophyta	Magnoliopsida	Asterales	Asteraceae	Crepis	Crepis pulchra	Crepis pulchra L.
4	Croton glandulosus L. var. septentrionalis Muell-Arg.	Croton glandulosus var. septentrionalis M√ºll.Arg.	8032516	EXACT	100	ACCEPTED	VARIETY	Plantae	Tracheophyta	Magnoliopsida	Malpighiales	Euphorbiaceae	Croton	Croton glandulosus	Croton glandulosus L.
4	Cuscuta compacta Jussieu	Cuscuta compacta Juss.	7363321	EXACT	100	DOUBTFUL	SPECIES	Plantae	Tracheophyta	Magnoliopsida	Solanales	Convolvulaceae	Cuscuta	Cuscuta compacta	Cuscuta compacta Juss. ex Choisy
4	Cyperus croceus Yahl.	Cyperus croceus Vahl	2713916	EXACT	88	ACCEPTED	SPECIES	Plantae	Tracheophyta	Liliopsida	Poales	Cyperaceae	Cyperus	Cyperus croceus	Cyperus croceus Vahl
4	Cyperus echinatus (L.) Wood	Cyperus echinatus Wood	2716294	EXACT	100	ACCEPTED	SPECIES	Plantae	Tracheophyta	Liliopsida	Poales	Cyperaceae	Cyperus	Cyperus echinatus	Cyperus echinatus Wood
4	Cyperus erythrorhizos Muhl.	Cyperus erythrorhizos Muhl.	6417217	EXACT	100	ACCEPTED	SPECIES	Plantae	Tracheophyta	Liliopsida	Poales	Cyperaceae	Cyperus	Cyperus erythrorhizos	Cyperus erythrorhizos Muhl.
4	Kyllinga pumila Michaux	Kyllinga pumila Michx.	2718844	EXACT	100	SYNONYM	SPECIES	Plantae	Tracheophyta	Liliopsida	Poales	Cyperaceae	Cyperus	Cyperus hortensis	Cyperus hortensis (Salzm. ex Steud.) Dorr
4	Cyperus lancastriensis Porter	Cyperus lancastriensis Porter	2714637	EXACT	100	ACCEPTED	SPECIES	Plantae	Tracheophyta	Liliopsida	Poales	Cyperaceae	Cyperus	Cyperus lancastriensis	Cyperus lancastriensis Porter
4	Cyperus pseudovegetus Steudel	Cyperus pseudovegetus Steud.	2715990	EXACT	100	ACCEPTED	SPECIES	Plantae	Tracheophyta	Liliopsida	Poales	Cyperaceae	Cyperus	Cyperus pseudovegetus	Cyperus pseudovegetus Steud.
4	Cyperus retrofractus (L.) Torrey	Cyperus retrofractus Torr.	2714386	EXACT	100	ACCEPTED	SPECIES	Plantae	Tracheophyta	Liliopsida	Poales	Cyperaceae	Cyperus	Cyperus retrofractus	Cyperus retrofractus Torr.
4	Cyperus retrorsus Chapman	Cyperus retrorsus Chapm.	2715517	EXACT	100	ACCEPTED	SPECIES	Plantae	Tracheophyta	Liliopsida	Poales	Cyperaceae	Cyperus	Cyperus retrorsus	Cyperus retrorsus Chapm.
4	Cyperus rotundus L.	Cyperus rotundus L.	2714818	EXACT	100	ACCEPTED	SPECIES	Plantae	Tracheophyta	Liliopsida	Poales	Cyperaceae	Cyperus	Cyperus rotundus	Cyperus rotundus L.
4	Cyperus squarrosa L.	Cyperus squarrosus L.	2714313	FUZZY	100	ACCEPTED	SPECIES	Plantae	Tracheophyta	Liliopsida	Poales	Cyperaceae	Cyperus	Cyperus squarrosus	Cyperus squarrosus L.
4	Cyperus strigosus L.	Cyperus strigosus L.	2716719	EXACT	100	ACCEPTED	SPECIES	Plantae	Tracheophyta	Liliopsida	Poales	Cyperaceae	Cyperus	Cyperus strigosus	Cyperus strigosus L.
4	Cyperus virens Michaux	Cyperus virens Michx.	2716420	EXACT	100	ACCEPTED	SPECIES	Plantae	Tracheophyta	Liliopsida	Poales	Cyperaceae	Cyperus	Cyperus virens	Cyperus virens Michx.
4	Dactylis glomerata L.	Dactylis glomerata L.	2705308	EXACT	100	ACCEPTED	SPECIES	Plantae	Tracheophyta	Liliopsida	Poales	Poaceae	Dactylis	Dactylis glomerata	Dactylis glomerata L.
4	Danthonia sericea Nuttall	Danthonia sericea Nutt.	2703256	EXACT	100	ACCEPTED	SPECIES	Plantae	Tracheophyta	Liliopsida	Poales	Poaceae	Danthonia	Danthonia sericea	Danthonia sericea Nutt.
4	Datura stramonium L.	Datura stramonium L.	2928751	EXACT	100	ACCEPTED	SPECIES	Plantae	Tracheophyta	Magnoliopsida	Solanales	Solanaceae	Datura	Datura stramonium	Datura stramonium L.
4	Daucus carota L.	Daucus carota L.	3034742	EXACT	100	ACCEPTED	SPECIES	Plantae	Tracheophyta	Magnoliopsida	Apiales	Apiaceae	Daucus	Daucus carota	Daucus carota L.
4	Desmodium ciliare (Muhl. ex Willd.) DC.	Desmodium ciliare DC.	2967713	EXACT	100	ACCEPTED	SPECIES	Plantae	Tracheophyta	Magnoliopsida	Fabales	Fabaceae	Desmodium	Desmodium ciliare	Desmodium ciliare DC.
4	Desmodium dillenii Dari.	Desmodium dillenii Darl.	2967866	EXACT	88	ACCEPTED	SPECIES	Plantae	Tracheophyta	Magnoliopsida	Fabales	Fabaceae	Desmodium	Desmodium dillenii	Desmodium dillenii Darl.
4	Desmodium nudiflorum (L.) DC.	Desmodium nudiflorum (L.) DC.	2967613	EXACT	100	ACCEPTED	SPECIES	Plantae	Tracheophyta	Magnoliopsida	Fabales	Fabaceae	Desmodium	Desmodium nudiflorum	Desmodium nudiflorum (L.) DC.
4	Desmodium paniculatum (L.) DC	Desmodium paniculatum DC.	2967543	EXACT	100	ACCEPTED	SPECIES	Plantae	Tracheophyta	Magnoliopsida	Fabales	Fabaceae	Desmodium	Desmodium paniculatum	Desmodium paniculatum DC.
4	Desmodium rotundifolium DC	Desmodium rotundifolium DC.	2952124	EXACT	100	ACCEPTED	SPECIES	Plantae	Tracheophyta	Magnoliopsida	Fabales	Fabaceae	Desmodium	Desmodium rotundifolium	Desmodium rotundifolium DC.
4	Dianthus armeria L.	Dianthus armeria L.	3085413	EXACT	100	ACCEPTED	SPECIES	Plantae	Tracheophyta	Magnoliopsida	Caryophyllales	Caryophyllaceae	Dianthus	Dianthus armeria	Dianthus armeria L.
4	Digitaria sanquinalis (L.) Scopoli	Digitaria sanguinalis (L.) Scop.	5289972	FUZZY	100	ACCEPTED	SPECIES	Plantae	Tracheophyta	Liliopsida	Poales	Poaceae	Digitaria	Digitaria sanguinalis	Digitaria sanguinalis (L.) Scop.
4	Diodia virginiana L.	Diodia virginiana L.	2908579	EXACT	100	ACCEPTED	SPECIES	Plantae	Tracheophyta	Magnoliopsida	Gentianales	Rubiaceae	Diodia	Diodia virginiana	Diodia virginiana L.
4	Dioscorea villosa L. var. floridana (Bartlett) Ahles	Dioscorea villosa var. floridana (Bartlett) H.E.Ahles	2755677	EXACT	100	SYNONYM	VARIETY	Plantae	Tracheophyta	Liliopsida	Dioscoreales	Dioscoreaceae	Dioscorea	Dioscorea floridana	Dioscorea floridana Bartlett
4	Dioscorea villosa L. var. villosa	Dioscorea villosa var. villosa	7778098	EXACT	99	SYNONYM	VARIETY	Plantae	Tracheophyta	Liliopsida	Dioscoreales	Dioscoreaceae	Dioscorea	Dioscorea villosa	Dioscorea villosa L.
4	Diospyros virginiana L.	Diospyros virginiana L.	3032986	EXACT	100	ACCEPTED	SPECIES	Plantae	Tracheophyta	Magnoliopsida	Ericales	Ebenaceae	Diospyros	Diospyros virginiana	Diospyros virginiana L.
4	Lycopodium digitatum Dillen. ex A. Braun	Lycopodium digitatum Dillen. ex A.Br.	2688375	EXACT	100	SYNONYM	SPECIES	Plantae	Tracheophyta	Lycopodiopsida	Lycopodiales	Lycopodiaceae	Diphasiastrum	Diphasiastrum digitatum	Diphasiastrum digitatum (A.Braun) Holub
4	Aster infirmus Michaux	Aster infirmus Michx.	5404911	EXACT	100	SYNONYM	SPECIES	Plantae	Tracheophyta	Magnoliopsida	Asterales	Asteraceae	Doellingeria	Doellingeria infirma	Doellingeria infirma Greene
4	Draba brachycatpa Nuttall ex T. & G. W	Draba brachycarpa Nutt. ex Torr. & A.Gray	7936451	FUZZY	98	DOUBTFUL	SPECIES	Plantae	Tracheophyta	Magnoliopsida	Brassicales	Brassicaceae	Draba	Draba brachycarpa	Draba brachycarpa Nutt.
4	Echinochloa crusgalli (L.) Beauvois	Echinochloa crus-galli (L.) P.Beauv.	2702808	FUZZY	100	ACCEPTED	SPECIES	Plantae	Tracheophyta	Liliopsida	Poales	Poaceae	Echinochloa	Echinochloa crus-galli	Echinochloa crus-galli (L.) P.Beauv.
4	Echinodorus cordifolius (L.) Grisebach	Echinodorus cordifolius (L.) Griseb.	5328774	EXACT	100	ACCEPTED	SPECIES	Plantae	Tracheophyta	Liliopsida	Alismatales	Alismataceae	Echinodorus	Echinodorus cordifolius	Echinodorus cordifolius (L.) Griseb.
4	Eclipta alba (L.) Hasskarl	Eclipta alba Hassk.	5384955	EXACT	100	ACCEPTED	SPECIES	Plantae	Tracheophyta	Magnoliopsida	Asterales	Asteraceae	Eclipta	Eclipta alba	Eclipta alba Hassk.
4	Elaeagnus umbellata Thunberg	Elaeagnus umbellata Thunb.	3039267	EXACT	100	SYNONYM	SPECIES	Plantae	Tracheophyta	Magnoliopsida	Rosales	Elaeagnaceae	Elaeagnus	Elaeagnus umbellata	Elaeagnus umbellata C.P.Thunb. ex A.Murray
4	Eleocharis obtusa (Willd.) Schultes	Eleocharis obtusa (Willd.) Schult.	2717467	EXACT	100	ACCEPTED	SPECIES	Plantae	Tracheophyta	Liliopsida	Poales	Cyperaceae	Eleocharis	Eleocharis obtusa	Eleocharis obtusa (Willd.) Schult.
4	Elephantopus carolinianus Willd.	Elephantopus carolinianus Willd.	7434217	EXACT	100	SYNONYM	SPECIES	Plantae	Tracheophyta	Magnoliopsida	Asterales	Asteraceae	Elephantopus	Elephantopus carolinianus	Elephantopus carolinianus Raeusch.
4	Elephantopus tomentosus L.	Elephantopus tomentosus L.	5395934	EXACT	100	ACCEPTED	SPECIES	Plantae	Tracheophyta	Magnoliopsida	Asterales	Asteraceae	Elephantopus	Elephantopus tomentosus	Elephantopus tomentosus L.
4	Eleusine indica (L.) Gaertner	Eleusine indica (L.) Gaertn.	2705953	EXACT	100	ACCEPTED	SPECIES	Plantae	Tracheophyta	Liliopsida	Poales	Poaceae	Eleusine	Eleusine indica	Eleusine indica (L.) Gaertn.
4	Elymus virginicus L.	Elymus virginicus L.	5290318	EXACT	100	ACCEPTED	SPECIES	Plantae	Tracheophyta	Liliopsida	Poales	Poaceae	Elymus	Elymus virginicus	Elymus virginicus L.
4	Epifagus virginiana (L.) Barton	Epifagus virginiana (L.) W.P.C.Barton	3173317	EXACT	100	ACCEPTED	SPECIES	Plantae	Tracheophyta	Magnoliopsida	Lamiales	Orobanchaceae	Epifagus	Epifagus virginiana	Epifagus virginiana (L.) W.P.C.Barton
4	Eragrostis hirsuta (Michx.) Nees	Eragrostis hirsuta Nees	2705442	EXACT	100	ACCEPTED	SPECIES	Plantae	Tracheophyta	Liliopsida	Poales	Poaceae	Eragrostis	Eragrostis hirsuta	Eragrostis hirsuta Nees
4	Eragrostis spectabilis (Pursh) Steudel	Eragrostis spectabilis Steud.	2705413	EXACT	100	ACCEPTED	SPECIES	Plantae	Tracheophyta	Liliopsida	Poales	Poaceae	Eragrostis	Eragrostis spectabilis	Eragrostis spectabilis Steud.
4	Erigeron annuus (L.) Persoon	Erigeron annuus Pers.	3117449	EXACT	100	ACCEPTED	SPECIES	Plantae	Tracheophyta	Magnoliopsida	Asterales	Asteraceae	Erigeron	Erigeron annuus	Erigeron annuus Pers.
4	Conyza canadensis (L.) Cronquist var. pusilla (Nuttall) Cronquist	Conyza canadensis var. pusilla (Nutt.) Cronquist	5692851	EXACT	100	SYNONYM	VARIETY	Plantae	Tracheophyta	Magnoliopsida	Asterales	Asteraceae	Erigeron	Erigeron canadensis	Erigeron canadensis L.
4	Erigeron quercifolius Lam.	Erigeron quercifolius Lam.	7363888	EXACT	100	ACCEPTED	SPECIES	Plantae	Tracheophyta	Magnoliopsida	Asterales	Asteraceae	Erigeron	Erigeron quercifolius	Erigeron quercifolius Lam.
4	Erigeron strigosus Muhl. ex Willd.	Erigeron strigosus Muhl. ex Willd.	3146632	EXACT	100	ACCEPTED	SPECIES	Plantae	Tracheophyta	Magnoliopsida	Asterales	Asteraceae	Erigeron	Erigeron strigosus	Erigeron strigosus Muhl. ex Willd.
4	Eryngium integrifolium Walter	Eryngium integrifolium Walter	3034388	EXACT	100	ACCEPTED	SPECIES	Plantae	Tracheophyta	Magnoliopsida	Apiales	Apiaceae	Eryngium	Eryngium integrifolium	Eryngium integrifolium Walter
4	Leucothoe racemosa (L.) Gray	Leucothoe racemosa (L.) Gray	5333363	EXACT	100	SYNONYM	SPECIES	Plantae	Tracheophyta	Magnoliopsida	Ericales	Ericaceae	Eubotrys	Eubotrys racemosa	Eubotrys racemosa Nutt.
4	Euonymus americanus L.	Euonymus americanus L.	3169130	EXACT	100	ACCEPTED	SPECIES	Plantae	Tracheophyta	Magnoliopsida	Celastrales	Celastraceae	Euonymus	Euonymus americanus	Euonymus americanus L.
4	Eupatorium album L. var. album	Eupatorium album var. album	7339031	EXACT	100	ACCEPTED	VARIETY	Plantae	Tracheophyta	Magnoliopsida	Asterales	Asteraceae	Eupatorium	Eupatorium album	Eupatorium album L.
4	Eupatorium capillifolium (Lam.) Small	Eupatorium capillifolium Small.	5403126	EXACT	100	ACCEPTED	SPECIES	Plantae	Tracheophyta	Magnoliopsida	Asterales	Asteraceae	Eupatorium	Eupatorium capillifolium	Eupatorium capillifolium Small.
4	Eupatorium compositifolium Walter	Eupatorium compositifolium Walter	5403000	EXACT	100	ACCEPTED	SPECIES	Plantae	Tracheophyta	Magnoliopsida	Asterales	Asteraceae	Eupatorium	Eupatorium compositifolium	Eupatorium compositifolium Walter
4	Eupatorium hyssopifolium L.	Eupatorium hyssopifolium L.	5403057	EXACT	100	ACCEPTED	SPECIES	Plantae	Tracheophyta	Magnoliopsida	Asterales	Asteraceae	Eupatorium	Eupatorium hyssopifolium	Eupatorium hyssopifolium L.
4	Eupatorium serotinum Michaux	Eupatorium serotinum Michx.	5402972	EXACT	100	ACCEPTED	SPECIES	Plantae	Tracheophyta	Magnoliopsida	Asterales	Asteraceae	Eupatorium	Eupatorium serotinum	Eupatorium serotinum Michx.
4	Euphorbia corollata L.	Euphorbia corollata L.	3068091	EXACT	100	ACCEPTED	SPECIES	Plantae	Tracheophyta	Magnoliopsida	Malpighiales	Euphorbiaceae	Euphorbia	Euphorbia corollata	Euphorbia corollata L.
4	Chamaesyce nutans (Lag.) Small	Chamaesyce nutans (Lag.) Small	3070358	EXACT	100	SYNONYM	SPECIES	Plantae	Tracheophyta	Magnoliopsida	Malpighiales	Euphorbiaceae	Euphorbia	Euphorbia nutans	Euphorbia nutans Lag.
4	Euphorbia pubentissima Michaux	Euphorbia pubentissima Michx.	3067381	EXACT	100	ACCEPTED	SPECIES	Plantae	Tracheophyta	Magnoliopsida	Malpighiales	Euphorbiaceae	Euphorbia	Euphorbia pubentissima	Euphorbia pubentissima Michx.
4	Eupatoriadelpus fistulosus (Barratt) King & H. Robinson	Eupatoriadelphus fistulosus (J.Barratt) R.King & H.Rob.	3138202	FUZZY	95	SYNONYM	SPECIES	Plantae	Tracheophyta	Magnoliopsida	Asterales	Asteraceae	Eutrochium	Eutrochium fistulosum	Eutrochium fistulosum (Barratt) E.E.Lamont
4	Fagus grandifolia Ehrhart	Fagus grandifolia Ehrh.	2882274	EXACT	100	ACCEPTED	SPECIES	Plantae	Tracheophyta	Magnoliopsida	Fagales	Fagaceae	Fagus	Fagus grandifolia	Fagus grandifolia Ehrh.
4	Polygonum scandens L.	Polygonum scandens L.	5334457	EXACT	100	SYNONYM	SPECIES	Plantae	Tracheophyta	Magnoliopsida	Caryophyllales	Polygonaceae	Fallopia	Fallopia scandens	Fallopia scandens (L.) Holub
4	Festuca pratensis Huds.	Festuca pratensis Huds.	2706239	EXACT	100	SYNONYM	SPECIES	Plantae	Tracheophyta	Liliopsida	Poales	Poaceae	Festuca	Festuca rubra	Festuca rubra L.
4	Fragaria virginiana Duchesne.	Fragaria virginiana Duchesne	7950792	EXACT	100	ACCEPTED	SPECIES	Plantae	Tracheophyta	Magnoliopsida	Rosales	Rosaceae	Fragaria	Fragaria virginiana	Fragaria virginiana Duchesne
4	Rhamnus caroliniana Walter	Rhamnus caroliniana Walt.	3039469	EXACT	100	SYNONYM	SPECIES	Plantae	Tracheophyta	Magnoliopsida	Rosales	Rhamnaceae	Frangula	Frangula caroliniana	Frangula caroliniana A.Gray
4	Fraxinus americana L.	Fraxinus americana L.	3172327	EXACT	100	ACCEPTED	SPECIES	Plantae	Tracheophyta	Magnoliopsida	Lamiales	Oleaceae	Fraxinus	Fraxinus americana	Fraxinus americana L.
4	Fraxinus pennsylvanica Marshall	Fraxinus pennsylvanica Marshall	3172348	EXACT	100	ACCEPTED	SPECIES	Plantae	Tracheophyta	Magnoliopsida	Lamiales	Oleaceae	Fraxinus	Fraxinus pennsylvanica	Fraxinus pennsylvanica Marshall
4	Galactia mollis Michaux	Galactia mollis Michx.	2984192	EXACT	100	ACCEPTED	SPECIES	Plantae	Tracheophyta	Magnoliopsida	Fabales	Fabaceae	Galactia	Galactia mollis	Galactia mollis Michx.
4	Galium aparine L.	Galium aparine L.	2913548	EXACT	100	ACCEPTED	SPECIES	Plantae	Tracheophyta	Magnoliopsida	Gentianales	Rubiaceae	Galium	Galium aparine	Galium aparine L.
4	Galium circaezans Michaux	Galium circaezans Michx.	2914722	EXACT	100	ACCEPTED	SPECIES	Plantae	Tracheophyta	Magnoliopsida	Gentianales	Rubiaceae	Galium	Galium circaezans	Galium circaezans Michx.
4	Galium obtusum Bigelow var. obtusum	Galium obtusum var. obtusum	7621122	EXACT	99	SYNONYM	VARIETY	Plantae	Tracheophyta	Magnoliopsida	Gentianales	Rubiaceae	Galium	Galium obtusum	Galium obtusum Bigelow
4	Galium pilosum Aiton	Galium pilosum Aiton	2913935	EXACT	100	ACCEPTED	SPECIES	Plantae	Tracheophyta	Magnoliopsida	Gentianales	Rubiaceae	Galium	Galium pilosum	Galium pilosum Aiton
4	Galium triflorum Michaux	Galium triflorum Michx.	2913463	EXACT	100	ACCEPTED	SPECIES	Plantae	Tracheophyta	Magnoliopsida	Gentianales	Rubiaceae	Galium	Galium triflorum	Galium triflorum Michx.
4	Gnaphalium purpureum L. var. purpureum	Gnaphalium purpureum var. purpureum	6444338	EXACT	99	SYNONYM	VARIETY	Plantae	Tracheophyta	Magnoliopsida	Asterales	Asteraceae	Gamochaeta	Gamochaeta purpurea	Gamochaeta purpurea (L.) Cabrera
4	Gelsemium sempervirens (L.) Aiton f.	Gelsemium sempervirens (L.) W.T.Aiton	7874345	EXACT	100	SYNONYM	SPECIES	Plantae	Tracheophyta	Magnoliopsida	Gentianales	Gelsemiaceae	Gelsemium	Gelsemium sempervirens	Gelsemium sempervirens (L.) J.St.-Hil.
4	Gentiana saponaria L.	Gentiana saponaria L.	3170086	EXACT	100	ACCEPTED	SPECIES	Plantae	Tracheophyta	Magnoliopsida	Gentianales	Gentianaceae	Gentiana	Gentiana saponaria	Gentiana saponaria L.
4	Geranium carolinianum L.	Geranium carolinianum L.	2890623	EXACT	100	ACCEPTED	SPECIES	Plantae	Tracheophyta	Magnoliopsida	Geraniales	Geraniaceae	Geranium	Geranium carolinianum	Geranium carolinianum L.
4	Geranium maculatum L.	Geranium maculatum L.	7808016	EXACT	100	ACCEPTED	SPECIES	Plantae	Tracheophyta	Magnoliopsida	Geraniales	Geraniaceae	Geranium	Geranium maculatum	Geranium maculatum L.
4	Geranium molle L.	Geranium molle L.	2891488	EXACT	100	ACCEPTED	SPECIES	Plantae	Tracheophyta	Magnoliopsida	Geraniales	Geraniaceae	Geranium	Geranium molle	Geranium molle L.
4	Geum canadense Jacquin	Geum canadense Jacq.	5369800	EXACT	100	ACCEPTED	SPECIES	Plantae	Tracheophyta	Magnoliopsida	Rosales	Rosaceae	Geum	Geum canadense	Geum canadense Jacq.
4	Waldsteinia fragarioides (Michx.) Tratt.	Waldsteinia fragarioides (Michx.) Tratt.	2986330	EXACT	100	SYNONYM	SPECIES	Plantae	Tracheophyta	Magnoliopsida	Rosales	Rosaceae	Geum	Geum fragarioides	Geum fragarioides (Michx.) Smedmark
4	Porteranthus trifo liatus L. Britt.	Porteranthus trifoliatus (L.) Britt.	2986434	FUZZY	95	SYNONYM	SPECIES	Plantae	Tracheophyta	Magnoliopsida	Rosales	Rosaceae	Gillenia	Gillenia trifoliata	Gillenia trifoliata Moench
4	Glandularia canadensis (L.) Small	Glandularia canadensis Small	7467893	EXACT	100	ACCEPTED	SPECIES	Plantae	Tracheophyta	Magnoliopsida	Lamiales	Verbenaceae	Glandularia	Glandularia canadensis	Glandularia canadensis Small
4	Gleditsia triacanthos L.	Gleditsia triacanthos L.	2959443	EXACT	100	ACCEPTED	SPECIES	Plantae	Tracheophyta	Magnoliopsida	Fabales	Fabaceae	Gleditsia	Gleditsia triacanthos	Gleditsia triacanthos L.
4	Glyceria striata (Lam.) Hitchcock	Glyceria striata (Lam.) Hitchc.	2705503	EXACT	100	ACCEPTED	SPECIES	Plantae	Tracheophyta	Liliopsida	Poales	Poaceae	Glyceria	Glyceria striata	Glyceria striata (Lam.) Hitchc.
4	Matelea suberosa (L.) Shinners	Matelea suberosa (L.) Shinners	3170506	EXACT	100	SYNONYM	SPECIES	Plantae	Tracheophyta	Magnoliopsida	Gentianales	Apocynaceae	Gonolobus	Gonolobus suberosus	Gonolobus suberosus (L.) Schult.
4	Goodyera pubescens (Willd.) R. Brown	Goodyera pubescens R.Br.	2840768	EXACT	100	ACCEPTED	SPECIES	Plantae	Tracheophyta	Liliopsida	Asparagales	Orchidaceae	Goodyera	Goodyera pubescens	Goodyera pubescens R.Br.
4	Gratiola virginiana L.	Gratiola virginiana L.	3171917	EXACT	100	ACCEPTED	SPECIES	Plantae	Tracheophyta	Magnoliopsida	Lamiales	Plantaginaceae	Gratiola	Gratiola virginiana	Gratiola virginiana L.
4	Halesia tetraptera Ellis	Halesia tetraptera J.Ellis	5371652	EXACT	100	ACCEPTED	SPECIES	Plantae	Tracheophyta	Magnoliopsida	Ericales	Styracaceae	Halesia	Halesia tetraptera	Halesia tetraptera J.Ellis
4	Helenium amarum (Raf.) H. Rock	Helenium amarum (Raf.) H.Rock	5401836	EXACT	100	ACCEPTED	SPECIES	Plantae	Tracheophyta	Magnoliopsida	Asterales	Asteraceae	Helenium	Helenium amarum	Helenium amarum (Raf.) H.Rock
4	Helenium autumnale L.	Helenium autumnale L.	5401877	EXACT	100	ACCEPTED	SPECIES	Plantae	Tracheophyta	Magnoliopsida	Asterales	Asteraceae	Helenium	Helenium autumnale	Helenium autumnale L.
4	Helianthus angustifolius L.	Helianthus angustifolius L.	3119144	EXACT	100	ACCEPTED	SPECIES	Plantae	Tracheophyta	Magnoliopsida	Asterales	Asteraceae	Helianthus	Helianthus angustifolius	Helianthus angustifolius L.
4	Helianthus microcephalus T. & G.	Helianthus microcephalus Torr. & A.Gray	4250889	EXACT	100	ACCEPTED	SPECIES	Plantae	Tracheophyta	Magnoliopsida	Asterales	Asteraceae	Helianthus	Helianthus microcephalus	Helianthus microcephalus Torr. & A.Gray
4	Helianthus tuberosus L.	Helianthus tuberosus L.	3119175	EXACT	100	ACCEPTED	SPECIES	Plantae	Tracheophyta	Magnoliopsida	Asterales	Asteraceae	Helianthus	Helianthus tuberosus	Helianthus tuberosus L.
4	Hemerocallis fulva L.	Hemerocallis fulva L.	2781074	EXACT	100	ACCEPTED	SPECIES	Plantae	Tracheophyta	Liliopsida	Asparagales	Asphodelaceae	Hemerocallis	Hemerocallis fulva	Hemerocallis fulva L.
4	Hepatica nobilis Schreb var. obtusa (Pursh) Steyem	Hepatica nobilis var. obtusa (Pursh) Steyerm.	5616031	EXACT	100	ACCEPTED	VARIETY	Plantae	Tracheophyta	Magnoliopsida	Ranunculales	Ranunculaceae	Hepatica	Hepatica nobilis	Hepatica nobilis Schreb.
4	Heterotheca subaxillaris (Lam.) Britton & Rushy	Heterotheca subaxillaris (Lam.) Britton & Rusby	5401971	EXACT	100	ACCEPTED	SPECIES	Plantae	Tracheophyta	Magnoliopsida	Asterales	Asteraceae	Heterotheca	Heterotheca subaxillaris	Heterotheca subaxillaris (Lam.) Britton & Rusby
4	Heuchera americana L.	Heuchera americana L.	3032665	EXACT	100	ACCEPTED	SPECIES	Plantae	Tracheophyta	Magnoliopsida	Saxifragales	Saxifragaceae	Heuchera	Heuchera americana	Heuchera americana L.
4	Diodia teres Walter	Diodia teres Walter	2901521	EXACT	100	SYNONYM	SPECIES	Plantae	Tracheophyta	Magnoliopsida	Gentianales	Rubiaceae	Hexasepalum	Hexasepalum teres	Hexasepalum teres (Walter) J.H.Kirkbr.
4	Hexastylis arifolia (Michaux) Small	Hexastylis arifolia Small	5331104	EXACT	100	ACCEPTED	SPECIES	Plantae	Tracheophyta	Magnoliopsida	Piperales	Aristolochiaceae	Hexastylis	Hexastylis arifolia	Hexastylis arifolia Small
4	Hibiscus laevis Allioni	Hibiscus laevis All.	3152576	EXACT	100	ACCEPTED	SPECIES	Plantae	Tracheophyta	Magnoliopsida	Malvales	Malvaceae	Hibiscus	Hibiscus laevis	Hibiscus laevis All.
4	Hibiscus moscheutos L. spp. moscheutos	Hibiscus moscheutos L.	3152596	EXACT	100	ACCEPTED	SPECIES	Plantae	Tracheophyta	Magnoliopsida	Malvales	Malvaceae	Hibiscus	Hibiscus moscheutos	Hibiscus moscheutos L.
4	Hieracium gronovii L.	Hieracium gronovii L.	3136062	EXACT	100	ACCEPTED	SPECIES	Plantae	Tracheophyta	Magnoliopsida	Asterales	Asteraceae	Hieracium	Hieracium gronovii	Hieracium gronovii L.
4	Hordeum pusillum Nuttall	Hordeum pusillum Nutt.	2706070	EXACT	100	ACCEPTED	SPECIES	Plantae	Tracheophyta	Liliopsida	Poales	Poaceae	Hordeum	Hordeum pusillum	Hordeum pusillum Nutt.
4	Houstonia longifolia L.	Houstonia longifolia Gaertn.	5338830	EXACT	88	ACCEPTED	SPECIES	Plantae	Tracheophyta	Magnoliopsida	Gentianales	Rubiaceae	Houstonia	Houstonia longifolia	Houstonia longifolia Gaertn.
4	Houstonia purpurea L.	Houstonia purpurea L.	5338840	EXACT	100	ACCEPTED	SPECIES	Plantae	Tracheophyta	Magnoliopsida	Gentianales	Rubiaceae	Houstonia	Houstonia purpurea	Houstonia purpurea L.
4	Houstonia pusilla Schoepf.	Houstonia pusilla Sch√∂pf	5338804	EXACT	100	ACCEPTED	SPECIES	Plantae	Tracheophyta	Magnoliopsida	Gentianales	Rubiaceae	Houstonia	Houstonia pusilla	Houstonia pusilla Sch√∂pf
4	Hydrangea arborescens L. ssp. arborescens	Hydrangea arborescens subsp. arborescens	6549796	EXACT	99	SYNONYM	SUBSPECIES	Plantae	Tracheophyta	Magnoliopsida	Cornales	Hydrangeaceae	Hydrangea	Hydrangea arborescens	Hydrangea arborescens L.
4	Decumaria barbara L.	Decumaria barbara L.	2985969	EXACT	100	SYNONYM	SPECIES	Plantae	Tracheophyta	Magnoliopsida	Cornales	Hydrangeaceae	Hydrangea	Hydrangea barbara	Hydrangea barbara (L.) Bernd Schulz
4	Hydrocotyle verticillata Thunberg	Hydrocotyle verticillata Thunb.	3034602	EXACT	100	ACCEPTED	SPECIES	Plantae	Tracheophyta	Magnoliopsida	Apiales	Apiaceae	Hydrocotyle	Hydrocotyle verticillata	Hydrocotyle verticillata Thunb.
4	Hypericum gentianoides (L.) BSP.	Hypericum gentianoides Britton	3189514	EXACT	86	ACCEPTED	SPECIES	Plantae	Tracheophyta	Magnoliopsida	Malpighiales	Hypericaceae	Hypericum	Hypericum gentianoides	Hypericum gentianoides Britton
4	Hypericum hypericoides (L.) Crantz	Hypericum hypericoides Crantz	3189520	EXACT	100	ACCEPTED	SPECIES	Plantae	Tracheophyta	Magnoliopsida	Malpighiales	Hypericaceae	Hypericum	Hypericum hypericoides	Hypericum hypericoides Crantz
4	Hypericum mutilum L.	Hypericum mutilum L.	3189462	EXACT	100	ACCEPTED	SPECIES	Plantae	Tracheophyta	Magnoliopsida	Malpighiales	Hypericaceae	Hypericum	Hypericum mutilum	Hypericum mutilum L.
4	Hypericum nudiflorum Michaux ex Willd.	Hypericum nudiflorum Michx. ex Willd.	3189518	EXACT	100	ACCEPTED	SPECIES	Plantae	Tracheophyta	Magnoliopsida	Malpighiales	Hypericaceae	Hypericum	Hypericum nudiflorum	Hypericum nudiflorum Michx. ex Willd.
4	Hypericum punctatum Lam.	Hypericum punctatum Lam.	3189495	EXACT	100	ACCEPTED	SPECIES	Plantae	Tracheophyta	Magnoliopsida	Malpighiales	Hypericaceae	Hypericum	Hypericum punctatum	Hypericum punctatum Lam.
4	Ilex opaca Aiton	Ilex opaca Soland. ex Ait.	5414248	EXACT	100	ACCEPTED	SPECIES	Plantae	Tracheophyta	Magnoliopsida	Aquifoliales	Aquifoliaceae	Ilex	Ilex opaca	Ilex opaca Soland. ex Ait.
4	Ilex verticillata (L.) Gray	Ilex verticillata A.Gray	5414267	EXACT	100	ACCEPTED	SPECIES	Plantae	Tracheophyta	Magnoliopsida	Aquifoliales	Aquifoliaceae	Ilex	Ilex verticillata	Ilex verticillata A.Gray
4	Impatiens capensis Meerb.	Impatiens capensis Meerb.	2891774	EXACT	100	ACCEPTED	SPECIES	Plantae	Tracheophyta	Magnoliopsida	Ericales	Balsaminaceae	Impatiens	Impatiens capensis	Impatiens capensis Meerb.
4	Ipomoea pandurata (L.) Meyer	Ipomoea pandurata (L.) G.F.W.Mey.	2928514	EXACT	100	SYNONYM	SPECIES	Plantae	Tracheophyta	Magnoliopsida	Solanales	Convolvulaceae	Ipomoea	Ipomoea batatas	Ipomoea batatas (L.) Lam.
4	Ipomoea hederacea (L.) Jacq.	Ipomoea hederacea Jacq.	2928538	EXACT	100	ACCEPTED	SPECIES	Plantae	Tracheophyta	Magnoliopsida	Solanales	Convolvulaceae	Ipomoea	Ipomoea hederacea	Ipomoea hederacea Jacq.
4	Ipomoea coccinea L.	Ipomoea coccinea L.	2928560	EXACT	100	SYNONYM	SPECIES	Plantae	Tracheophyta	Magnoliopsida	Solanales	Convolvulaceae	Ipomoea	Ipomoea rubriflora	Ipomoea rubriflora O'Donell
4	Iris virginica L.	Iris virginica L.	5298008	EXACT	100	ACCEPTED	SPECIES	Plantae	Tracheophyta	Liliopsida	Asparagales	Iridaceae	Iris	Iris virginica	Iris virginica L.
4	Jacquemontia tamnifolia (L.) Grisebach	Jacquemontia tamnifolia (L.) Griseb.	5341725	EXACT	100	ACCEPTED	SPECIES	Plantae	Tracheophyta	Magnoliopsida	Solanales	Convolvulaceae	Jacquemontia	Jacquemontia tamnifolia	Jacquemontia tamnifolia (L.) Griseb.
4	Juglans nigra L.	Juglans nigra L.	3054357	EXACT	100	ACCEPTED	SPECIES	Plantae	Tracheophyta	Magnoliopsida	Fagales	Juglandaceae	Juglans	Juglans nigra	Juglans nigra L.
4	Juncus acuminatus Michaux	Juncus acuminatus Michx.	2701323	EXACT	100	ACCEPTED	SPECIES	Plantae	Tracheophyta	Liliopsida	Poales	Juncaceae	Juncus	Juncus acuminatus	Juncus acuminatus Michx.
4	Juncus coriaceus Mackenzie	Juncus coriaceus Mack.	2701445	EXACT	100	ACCEPTED	SPECIES	Plantae	Tracheophyta	Liliopsida	Poales	Juncaceae	Juncus	Juncus coriaceus	Juncus coriaceus Mack.
4	Juncus debilis Gray	Juncus debilis A.Gray	2701293	EXACT	100	ACCEPTED	SPECIES	Plantae	Tracheophyta	Liliopsida	Poales	Juncaceae	Juncus	Juncus debilis	Juncus debilis A.Gray
4	Juncus dichotomus Ell.	Juncus dichotomus Elliott	2701120	EXACT	100	ACCEPTED	SPECIES	Plantae	Tracheophyta	Liliopsida	Poales	Juncaceae	Juncus	Juncus dichotomus	Juncus dichotomus Elliott
4	Juncus effusus L.	Juncus effusus L.	2701311	EXACT	100	ACCEPTED	SPECIES	Plantae	Tracheophyta	Liliopsida	Poales	Juncaceae	Juncus	Juncus effusus	Juncus effusus L.
4	Juncus georgianus Coville	Juncus georgianus Coville	2701180	EXACT	100	DOUBTFUL	SPECIES	Plantae	Tracheophyta	Liliopsida	Poales	Juncaceae	Juncus	Juncus georgianus	Juncus georgianus Coville ex Small
4	Juncus marginatus Rostk. var. marginatus	Juncus marginatus var. marginatus	4270816	EXACT	99	SYNONYM	VARIETY	Plantae	Tracheophyta	Liliopsida	Poales	Juncaceae	Juncus	Juncus marginatus	Juncus marginatus Rostk.
4	Juncus polycephalus Michaux	Juncus polycephalus Michx.	2702076	EXACT	100	ACCEPTED	SPECIES	Plantae	Tracheophyta	Liliopsida	Poales	Juncaceae	Juncus	Juncus polycephalus	Juncus polycephalus Michx.
4	Juncus scirpoides Lam.	Juncus scirpoides Lam.	2701678	EXACT	100	ACCEPTED	SPECIES	Plantae	Tracheophyta	Liliopsida	Poales	Juncaceae	Juncus	Juncus scirpoides	Juncus scirpoides Lam.
4	Juncus tenuis Willd.	Juncus tenuis Willd.	2702084	EXACT	100	ACCEPTED	SPECIES	Plantae	Tracheophyta	Liliopsida	Poales	Juncaceae	Juncus	Juncus tenuis	Juncus tenuis Willd.
4	Juniperus virginiana L.	Juniperus virginiana L.	2684391	EXACT	100	ACCEPTED	SPECIES	Plantae	Tracheophyta	Pinopsida	Pinales	Cupressaceae	Juniperus	Juniperus virginiana	Juniperus virginiana L.
4	Kalmia latifolia L.	Kalmia latifolia L.	2883005	EXACT	100	ACCEPTED	SPECIES	Plantae	Tracheophyta	Magnoliopsida	Ericales	Ericaceae	Kalmia	Kalmia latifolia	Kalmia latifolia L.
4	Krigia cespitosa (Raf.) K. Chambers	Krigia cespitosa (Raf.) K.L.Chambers	3132422	EXACT	100	ACCEPTED	SPECIES	Plantae	Tracheophyta	Magnoliopsida	Asterales	Asteraceae	Krigia	Krigia cespitosa	Krigia cespitosa (Raf.) K.L.Chambers
4	Krigia virginica (L.) Willd.	Krigia virginica Willd.	3132412	EXACT	100	ACCEPTED	SPECIES	Plantae	Tracheophyta	Magnoliopsida	Asterales	Asteraceae	Krigia	Krigia virginica	Krigia virginica Willd.
4	Kummerowia striata (Thunb.) Schindl.	Kummerowia striata (Thunb. ex Murray) Schindl.	5352523	EXACT	100	ACCEPTED	SPECIES	Plantae	Tracheophyta	Magnoliopsida	Fabales	Fabaceae	Kummerowia	Kummerowia striata	Kummerowia striata (Thunb. ex Murray) Schindl.
4	Lactuca canadensis L.	Lactuca canadensis L.	3140315	EXACT	100	ACCEPTED	SPECIES	Plantae	Tracheophyta	Magnoliopsida	Asterales	Asteraceae	Lactuca	Lactuca canadensis	Lactuca canadensis L.
4	Lactuca floridana (L.) Gaertn.	Lactuca floridana (L.) Gaertn.	3140423	EXACT	100	ACCEPTED	SPECIES	Plantae	Tracheophyta	Magnoliopsida	Asterales	Asteraceae	Lactuca	Lactuca floridana	Lactuca floridana (L.) Gaertn.
4	Lactuca serriola L.	Lactuca serriola L.	3140490	EXACT	100	ACCEPTED	SPECIES	Plantae	Tracheophyta	Magnoliopsida	Asterales	Asteraceae	Lactuca	Lactuca serriola	Lactuca serriola L.
4	Lagerstoemia indica L.	Lagerstroemia indica L.	3188725	FUZZY	94	ACCEPTED	SPECIES	Plantae	Tracheophyta	Magnoliopsida	Myrtales	Lythraceae	Lagerstroemia	Lagerstroemia indica	Lagerstroemia indica L.
4	Lamium amplexicaule L.	Lamium amplexicaule L.	2926679	EXACT	100	ACCEPTED	SPECIES	Plantae	Tracheophyta	Magnoliopsida	Lamiales	Lamiaceae	Lamium	Lamium amplexicaule	Lamium amplexicaule L.
4	Lamium purpureum L.	Lamium purpureum L.	2926682	EXACT	100	ACCEPTED	SPECIES	Plantae	Tracheophyta	Magnoliopsida	Lamiales	Lamiaceae	Lamium	Lamium purpureum	Lamium purpureum L.
4	Leersia oryzoides (L.) Swartz.	Leersia oryzoides (L.) Sw.	2702905	EXACT	100	ACCEPTED	SPECIES	Plantae	Tracheophyta	Liliopsida	Poales	Poaceae	Leersia	Leersia oryzoides	Leersia oryzoides (L.) Sw.
4	Leersia virginica Willd.	Leersia virginica Willd.	7325335	EXACT	100	ACCEPTED	SPECIES	Plantae	Tracheophyta	Liliopsida	Poales	Poaceae	Leersia	Leersia virginica	Leersia virginica Willd.
4	Lepidium virginicum L.	Lepidium virginicum L.	5376648	EXACT	100	ACCEPTED	SPECIES	Plantae	Tracheophyta	Magnoliopsida	Brassicales	Brassicaceae	Lepidium	Lepidium virginicum	Lepidium virginicum L.
4	Lespedeza bicolor Turez.	Lespedeza bicolor Turcz.	2955759	EXACT	84	ACCEPTED	SPECIES	Plantae	Tracheophyta	Magnoliopsida	Fabales	Fabaceae	Lespedeza	Lespedeza bicolor	Lespedeza bicolor Turcz.
4	Lespedeza hirta (L.) Bornemann	Lespedeza hirta Hornem.	2955750	EXACT	84	ACCEPTED	SPECIES	Plantae	Tracheophyta	Magnoliopsida	Fabales	Fabaceae	Lespedeza	Lespedeza hirta	Lespedeza hirta Hornem.
4	Lespedeza cuneata (Dumont) G. Don	Lespedeza cuneata (Dum.Cours.) G.Don	8114276	EXACT	100	SYNONYM	SPECIES	Plantae	Tracheophyta	Magnoliopsida	Fabales	Fabaceae	Lespedeza	Lespedeza juncea	Lespedeza juncea (L.) Pers.
4	Lespedeza procumbens Michaux	Lespedeza procumbens Michx.	2955681	EXACT	100	ACCEPTED	SPECIES	Plantae	Tracheophyta	Magnoliopsida	Fabales	Fabaceae	Lespedeza	Lespedeza procumbens	Lespedeza procumbens Michx.
4	Lespedeza repens (L.) Bart.	Lespedeza repens Barton	2955745	EXACT	100	ACCEPTED	SPECIES	Plantae	Tracheophyta	Magnoliopsida	Fabales	Fabaceae	Lespedeza	Lespedeza repens	Lespedeza repens Barton
4	Lespedeza stuevei Nuttall W	Lespedeza stuevei Nutt.	2955756	EXACT	100	ACCEPTED	SPECIES	Plantae	Tracheophyta	Magnoliopsida	Fabales	Fabaceae	Lespedeza	Lespedeza stuevei	Lespedeza stuevei Nutt.
4	Lespedeza virginica (L.) Britt.	Lespedeza virginica (L.) Britton	2955685	EXACT	100	ACCEPTED	SPECIES	Plantae	Tracheophyta	Magnoliopsida	Fabales	Fabaceae	Lespedeza	Lespedeza virginica	Lespedeza virginica (L.) Britton
4	Chrysanthemum leucanthemum L.	Chrysanthemum leucanthemum L.	3134125	EXACT	100	SYNONYM	SPECIES	Plantae	Tracheophyta	Magnoliopsida	Asterales	Asteraceae	Leucanthemum	Leucanthemum vulgare	Leucanthemum vulgare Lam.
4	Liatris graminifolia Willd.	Liatris graminifolia (Walt.) Willd.	3104356	EXACT	100	SYNONYM	SPECIES	Plantae	Tracheophyta	Magnoliopsida	Asterales	Asteraceae	Liatris	Liatris pilosa	Liatris pilosa Willd.
4	Ligustrum sinense Lour.	Ligustrum sinense Lour.	3172294	EXACT	100	ACCEPTED	SPECIES	Plantae	Tracheophyta	Magnoliopsida	Lamiales	Oleaceae	Ligustrum	Ligustrum sinense	Ligustrum sinense Lour.
4	Linaria canadensis (L.) Dumont	Linaria canadensis (L.) Dumort.	7497062	EXACT	100	DOUBTFUL	SPECIES	Plantae	Tracheophyta	Magnoliopsida	Lamiales	Plantaginaceae	Linaria	Linaria canadensis	Linaria canadensis (L.) Dum.-Courset
4	Lindernia dubia (L.) Pennell	Lindernia dubia (L.) Pennell	3171888	EXACT	100	ACCEPTED	SPECIES	Plantae	Tracheophyta	Magnoliopsida	Lamiales	Linderniaceae	Lindernia	Lindernia dubia	Lindernia dubia (L.) Pennell
4	Linum striatum Walter	Linum striatum Walter	2873857	EXACT	100	ACCEPTED	SPECIES	Plantae	Tracheophyta	Magnoliopsida	Malpighiales	Linaceae	Linum	Linum striatum	Linum striatum Walter
4	Liquidambar styraciflua L.	Liquidambar styraciflua L.	3152824	EXACT	100	ACCEPTED	SPECIES	Plantae	Tracheophyta	Magnoliopsida	Saxifragales	Altingiaceae	Liquidambar	Liquidambar styraciflua	Liquidambar styraciflua L.
4	Liriodendron tulipifera L.	Liriodendron tulipifera L.	3152861	EXACT	100	ACCEPTED	SPECIES	Plantae	Tracheophyta	Magnoliopsida	Magnoliales	Magnoliaceae	Liriodendron	Liriodendron tulipifera	Liriodendron tulipifera L.
4	Liriope muscari Bailey	Liriope muscari L.H.Bailey	5549949	EXACT	100	ACCEPTED	SPECIES	Plantae	Tracheophyta	Liliopsida	Asparagales	Asparagaceae	Liriope	Liriope muscari	Liriope muscari L.H.Bailey
4	Lobelia amoena Michaux	Lobelia amoena Michx.	5408475	EXACT	100	ACCEPTED	SPECIES	Plantae	Tracheophyta	Magnoliopsida	Asterales	Campanulaceae	Lobelia	Lobelia amoena	Lobelia amoena Michx.
4	Lobelia cardinalis L.	Lobelia cardinalis L.	5408269	EXACT	100	ACCEPTED	SPECIES	Plantae	Tracheophyta	Magnoliopsida	Asterales	Campanulaceae	Lobelia	Lobelia cardinalis	Lobelia cardinalis L.
4	Lobelia inflata L.	Lobelia inflata L.	5408737	EXACT	100	ACCEPTED	SPECIES	Plantae	Tracheophyta	Magnoliopsida	Asterales	Campanulaceae	Lobelia	Lobelia inflata	Lobelia inflata L.
4	Lobelia puberula Michx.	Lobelia puberula Michx.	5408342	EXACT	100	ACCEPTED	SPECIES	Plantae	Tracheophyta	Magnoliopsida	Asterales	Campanulaceae	Lobelia	Lobelia puberula	Lobelia puberula Michx.
4	Lobelia spicata Lam.	Lobelia spicata Lam.	5408750	EXACT	100	ACCEPTED	SPECIES	Plantae	Tracheophyta	Magnoliopsida	Asterales	Campanulaceae	Lobelia	Lobelia spicata	Lobelia spicata Lam.
4	Lolium perenne L. var. multiflorum Lam.	Lolium perenne L.	2706241	HIGHERRANK	99	ACCEPTED	SPECIES	Plantae	Tracheophyta	Liliopsida	Poales	Poaceae	Lolium	Lolium perenne	Lolium perenne L.
4	Lonicera japonica Thunberg	Lonicera japonica Thunb.	5334240	EXACT	100	ACCEPTED	SPECIES	Plantae	Tracheophyta	Magnoliopsida	Dipsacales	Caprifoliaceae	Lonicera	Lonicera japonica	Lonicera japonica Thunb.
4	Lonicera sempervirens L.	Lonicera sempervirens L.	5334239	EXACT	100	ACCEPTED	SPECIES	Plantae	Tracheophyta	Magnoliopsida	Dipsacales	Caprifoliaceae	Lonicera	Lonicera sempervirens	Lonicera sempervirens L.
4	Woodwardia areolata L.	Woodwardia areolata (L.) Moore	5275360	EXACT	87	SYNONYM	SPECIES	Plantae	Tracheophyta	Polypodiopsida	Polypodiales	Blechnaceae	Lorinseria	Lorinseria areolata	Lorinseria areolata C.Presl
4	Ludwigia alternifolia L.	Ludwigia alternifolia L.	5420992	EXACT	100	ACCEPTED	SPECIES	Plantae	Tracheophyta	Magnoliopsida	Myrtales	Onagraceae	Ludwigia	Ludwigia alternifolia	Ludwigia alternifolia L.
4	Ludwigia decurrens Walter	Ludwigia decurrens Walter	5421002	EXACT	100	ACCEPTED	SPECIES	Plantae	Tracheophyta	Magnoliopsida	Myrtales	Onagraceae	Ludwigia	Ludwigia decurrens	Ludwigia decurrens Walter
4	Luzula echinata (Small) Hermann	Luzula echinata (Small) F.J.Herm.	2701010	EXACT	100	ACCEPTED	SPECIES	Plantae	Tracheophyta	Liliopsida	Poales	Juncaceae	Luzula	Luzula echinata	Luzula echinata (Small) F.J.Herm.
4	Lycopus rubellus Moench	Lycopus rubellus Moench	5341465	EXACT	100	ACCEPTED	SPECIES	Plantae	Tracheophyta	Magnoliopsida	Lamiales	Lamiaceae	Lycopus	Lycopus rubellus	Lycopus rubellus Moench
4	Lycopus virginicus L.	Lycopus virginicus L.	5341476	EXACT	100	ACCEPTED	SPECIES	Plantae	Tracheophyta	Magnoliopsida	Lamiales	Lamiaceae	Lycopus	Lycopus virginicus	Lycopus virginicus L.
4	Lysimachia ciliata L.	Lysimachia ciliata L.	3169391	EXACT	100	ACCEPTED	SPECIES	Plantae	Tracheophyta	Magnoliopsida	Ericales	Primulaceae	Lysimachia	Lysimachia ciliata	Lysimachia ciliata L.
4	Lysimachia lanceolata Walter var. lanceolata	Lysimachia lanceolata var. lanceolata	7782575	EXACT	99	SYNONYM	VARIETY	Plantae	Tracheophyta	Magnoliopsida	Ericales	Primulaceae	Lysimachia	Lysimachia lanceolata	Lysimachia lanceolata Walter
4	Magnolia acuminata L.	Magnolia acuminata L.	3153837	EXACT	100	ACCEPTED	SPECIES	Plantae	Tracheophyta	Magnoliopsida	Magnoliales	Magnoliaceae	Magnolia	Magnolia acuminata	Magnolia acuminata L.
4	Magnolia grandiflora L.	Magnolia grandiflora L.	9605163	EXACT	100	ACCEPTED	SPECIES	Plantae	Tracheophyta	Magnoliopsida	Magnoliales	Magnoliaceae	Magnolia	Magnolia grandiflora	Magnolia grandiflora L.
4	Magnolia virginiana L.	Magnolia virginiana L.	3153639	EXACT	100	ACCEPTED	SPECIES	Plantae	Tracheophyta	Magnoliopsida	Magnoliales	Magnoliaceae	Magnolia	Magnolia virginiana	Magnolia virginiana L.
4	Smilacina racemosa (L.) Desf.	Smilacina racemosa (L.) Desf.	2769490	EXACT	100	SYNONYM	SPECIES	Plantae	Tracheophyta	Liliopsida	Asparagales	Asparagaceae	Maianthemum	Maianthemum racemosum	Maianthemum racemosum Link
4	Malaxis unifolia Michaux	Malaxis unifolia Michx.	2808176	EXACT	100	ACCEPTED	SPECIES	Plantae	Tracheophyta	Liliopsida	Asparagales	Orchidaceae	Malaxis	Malaxis unifolia	Malaxis unifolia Michx.
4	Malus angustifolia (Aiton) Michaux	Malus angustifolia (Aiton) Michx.	3001548	EXACT	100	ACCEPTED	SPECIES	Plantae	Tracheophyta	Magnoliopsida	Rosales	Rosaceae	Malus	Malus angustifolia	Malus angustifolia (Aiton) Michx.
4	Mecardonia acuminata (Walter) Small	Mecardonia acuminata Small	3172019	EXACT	100	ACCEPTED	SPECIES	Plantae	Tracheophyta	Magnoliopsida	Lamiales	Plantaginaceae	Mecardonia	Mecardonia acuminata	Mecardonia acuminata Small
4	Melia azedarach L.	Melia azedarach L.	5914287	EXACT	100	ACCEPTED	SPECIES	Plantae	Tracheophyta	Magnoliopsida	Sapindales	Meliaceae	Melia	Melia azedarach	Melia azedarach L.
4	Melica mutica Walter	Melica mutica Walter	2703127	EXACT	100	ACCEPTED	SPECIES	Plantae	Tracheophyta	Liliopsida	Poales	Poaceae	Melica	Melica mutica	Melica mutica Walter
4	Melilotus alba Desr.	Melilotus albus Desrousseaux	7907856	FUZZY	100	SYNONYM	SPECIES	Plantae	Tracheophyta	Magnoliopsida	Fabales	Fabaceae	Melilotus	Melilotus albus	Melilotus albus Medik.
4	Melothria pendula L.	Melothria pendula L.	2874550	EXACT	100	ACCEPTED	SPECIES	Plantae	Tracheophyta	Magnoliopsida	Cucurbitales	Cucurbitaceae	Melothria	Melothria pendula	Melothria pendula L.
4	Saxifraga virginiensis Michaux	Saxifraga virginiensis Michx.	3032764	EXACT	100	SYNONYM	SPECIES	Plantae	Tracheophyta	Magnoliopsida	Saxifragales	Saxifragaceae	Micranthes	Micranthes virginiensis	Micranthes virginiensis Small
4	Eulalia viminea (Trinius) Kuntze	Eulalia viminea (Trin.) Kuntze	5289809	EXACT	100	SYNONYM	SPECIES	Plantae	Tracheophyta	Liliopsida	Poales	Poaceae	Microstegium	Microstegium vimineum	Microstegium vimineum (Trin.) A.Camus
4	Mikania scandens (L.) Willd.	Mikania scandens Willd.	5398828	EXACT	100	ACCEPTED	SPECIES	Plantae	Tracheophyta	Magnoliopsida	Asterales	Asteraceae	Mikania	Mikania scandens	Mikania scandens Willd.
4	Schrankia microphylla (Dry.) MacBride	Schrankia microphylla (Dryand.) J.F.Macbr.	5358382	EXACT	100	SYNONYM	SPECIES	Plantae	Tracheophyta	Magnoliopsida	Fabales	Fabaceae	Mimosa	Mimosa quadrivalvis	Mimosa quadrivalvis L.
4	Mimulus ringens L.	Mimulus ringens L.	6070732	EXACT	100	ACCEPTED	SPECIES	Plantae	Tracheophyta	Magnoliopsida	Lamiales	Phrymaceae	Mimulus	Mimulus ringens	Mimulus ringens L.
4	Mitchella repens L.	Mitchella repens L.	5338762	EXACT	100	ACCEPTED	SPECIES	Plantae	Tracheophyta	Magnoliopsida	Gentianales	Rubiaceae	Mitchella	Mitchella repens	Mitchella repens L.
4	Modiola caroliniana (L.) G. Don	Modiola caroliniana (L.) G.Don	8338793	EXACT	100	ACCEPTED	SPECIES	Plantae	Tracheophyta	Magnoliopsida	Malvales	Malvaceae	Modiola	Modiola caroliniana	Modiola caroliniana (L.) G.Don
4	Monarda punctata L.	Monarda punctata L.	5341413	EXACT	100	ACCEPTED	SPECIES	Plantae	Tracheophyta	Magnoliopsida	Lamiales	Lamiaceae	Monarda	Monarda punctata	Monarda punctata L.
4	Monotropa uniflora L.	Monotropa uniflora L.	2888353	EXACT	100	ACCEPTED	SPECIES	Plantae	Tracheophyta	Magnoliopsida	Ericales	Ericaceae	Monotropa	Monotropa uniflora	Monotropa uniflora L.
4	Moros rubra L.	Morus rubra L.	5361886	FUZZY	94	ACCEPTED	SPECIES	Plantae	Tracheophyta	Magnoliopsida	Rosales	Moraceae	Morus	Morus rubra	Morus rubra L.
4	Murdannia nudiflora (L.) Brennen	Murdannia nudiflora (L.) Brenan	2764680	EXACT	100	ACCEPTED	SPECIES	Plantae	Tracheophyta	Liliopsida	Commelinales	Commelinaceae	Murdannia	Murdannia nudiflora	Murdannia nudiflora (L.) Brenan
4	Muscari racemosum (L.) Miller	Muscari racemosum (L.) Mill.	7977586	EXACT	100	ACCEPTED	SPECIES	Plantae	Tracheophyta	Liliopsida	Asparagales	Asparagaceae	Muscari	Muscari racemosum	Muscari racemosum (L.) Mill.
4	Myriophyllum aquaticum (Vell.) Verde.	Myriophyllum aquaticum (Vell.) Verdc.	5361785	EXACT	100	ACCEPTED	SPECIES	Plantae	Tracheophyta	Magnoliopsida	Saxifragales	Haloragaceae	Myriophyllum	Myriophyllum aquaticum	Myriophyllum aquaticum (Vell.) Verdc.
4	Cheilanthes lanosa (Michaux) D.C. Eaton	Cheilanthes lanosa (Michx.) D.C.Eat.	8226150	EXACT	100	SYNONYM	SPECIES	Plantae	Tracheophyta	Polypodiopsida	Polypodiales	Pteridaceae	Myriopteris	Myriopteris lanosa	Myriopteris lanosa (Michx.) Grusz & Windham
4	Cheilanthes tomentosa Link	Cheilanthes tomentosa Link	2651751	EXACT	100	SYNONYM	SPECIES	Plantae	Tracheophyta	Polypodiopsida	Polypodiales	Pteridaceae	Myriopteris	Myriopteris tomentosa	Myriopteris tomentosa F
4	Prenanthes altissima L.	Prenanthes altissima L.	3090756	EXACT	100	SYNONYM	SPECIES	Plantae	Tracheophyta	Magnoliopsida	Asterales	Asteraceae	Nabalus	Nabalus altissima	Nabalus altissima Hook.
4	Narcissus tazetta L. x poeticus L.	Plantae	6	HIGHERRANK	99	ACCEPTED	KINGDOM	Plantae						Narcissus hybrid	Narcissus L.
4	Nemophila menziesii H. & A.	Nemophila menziesii Hook. & Arn.	2928026	EXACT	100	ACCEPTED	SPECIES	Plantae	Tracheophyta	Magnoliopsida	Boraginales	Hydrophyllaceae	Nemophila	Nemophila menziesii	Nemophila menziesii Hook. & Arn.
4	Allium bivalve (L.) Kuntze	Allium bivalve (L.) Kuntze	2855601	EXACT	100	SYNONYM	SPECIES	Plantae	Tracheophyta	Liliopsida	Asparagales	Amaryllidaceae	Nothoscordum	Nothoscordum bivalve	Nothoscordum bivalve Britton
4	Nyssa biflora Walter	Nyssa biflora Walter	5383713	EXACT	100	SYNONYM	SPECIES	Plantae	Tracheophyta	Magnoliopsida	Cornales	Nyssaceae	Nyssa	Nyssa sylvatica	Nyssa sylvatica Marshall
4	Nyssa sylvatica Marshall	Nyssa sylvatica Marshall	5383717	EXACT	100	ACCEPTED	SPECIES	Plantae	Tracheophyta	Magnoliopsida	Cornales	Nyssaceae	Nyssa	Nyssa sylvatica	Nyssa sylvatica Marshall
4	Oenothera biennis L.	Oenothera biennis L.	3188924	EXACT	100	ACCEPTED	SPECIES	Plantae	Tracheophyta	Magnoliopsida	Myrtales	Onagraceae	Oenothera	Oenothera biennis	Oenothera biennis L.
4	Oenothera laciniata Hill	Oenothera laciniata Hill	3188867	EXACT	100	ACCEPTED	SPECIES	Plantae	Tracheophyta	Magnoliopsida	Myrtales	Onagraceae	Oenothera	Oenothera laciniata	Oenothera laciniata Hill
4	Onoclea sensibilis L.	Onoclea sensibilis L.	2650903	EXACT	100	ACCEPTED	SPECIES	Plantae	Tracheophyta	Polypodiopsida	Polypodiales	Onocleaceae	Onoclea	Onoclea sensibilis	Onoclea sensibilis L.
4	Opuntia humifusa Raf.	Opuntia humifusa Raf.	5384047	EXACT	100	ACCEPTED	SPECIES	Plantae	Tracheophyta	Magnoliopsida	Caryophyllales	Cactaceae	Opuntia	Opuntia humifusa	Opuntia humifusa Raf.
4	Orontium aguaticum L.	Orontium aquaticum L.	5330733	FUZZY	99	ACCEPTED	SPECIES	Plantae	Tracheophyta	Liliopsida	Alismatales	Araceae	Orontium	Orontium aquaticum	Orontium aquaticum L.
4	Osmunda cinnamomea L.	Osmunda cinnamomea L.	2651326	EXACT	100	SYNONYM	SPECIES	Plantae	Tracheophyta	Polypodiopsida	Osmundales	Osmundaceae	Osmundastrum	Osmundastrum cinnamomeum	Osmundastrum cinnamomeum (L.) C.Presl
4	Ostrya virginiana (Mill.) K. Koch	Ostrya virginiana K.Koch	5332289	EXACT	100	ACCEPTED	SPECIES	Plantae	Tracheophyta	Magnoliopsida	Fagales	Betulaceae	Ostrya	Ostrya virginiana	Ostrya virginiana K.Koch
4	Oxalis rubra St. Hill	Oxalis rubra A.St.-Hil.	2891727	EXACT	100	SYNONYM	SPECIES	Plantae	Tracheophyta	Magnoliopsida	Oxalidales	Oxalidaceae	Oxalis	Oxalis articulata	Oxalis articulata Savign.
4	Oxalis stricta L.	Oxalis stricta L.	9823072	EXACT	100	SYNONYM	SPECIES	Plantae	Tracheophyta	Magnoliopsida	Oxalidales	Oxalidaceae	Oxalis	Oxalis corniculata	Oxalis corniculata L.
4	Oxalis violacea L.	Oxalis violacea L.	2891708	EXACT	100	ACCEPTED	SPECIES	Plantae	Tracheophyta	Magnoliopsida	Oxalidales	Oxalidaceae	Oxalis	Oxalis violacea	Oxalis violacea L.
4	Oxydendrum arboreum (L.) DC.	Oxydendrum arboreum DC.	2882708	EXACT	100	ACCEPTED	SPECIES	Plantae	Tracheophyta	Magnoliopsida	Ericales	Ericaceae	Oxydendrum	Oxydendrum arboreum	Oxydendrum arboreum DC.
4	Senecio anonymous Wood	Senecio anonymus A.Wood.	3107474	FUZZY	99	SYNONYM	SPECIES	Plantae	Tracheophyta	Magnoliopsida	Asterales	Asteraceae	Packera	Packera anonyma	Packera anonyma (Wood) W.A.Weber & √Å.L√∂ve
4	Senecio glabellus Poiret	Senecio glabellus Poir.	8047297	EXACT	100	SYNONYM	SPECIES	Plantae	Tracheophyta	Magnoliopsida	Asterales	Asteraceae	Packera	Packera glabella	Packera glabella (Poir.) C.Jeffrey
4	Dichanthelium boscii (Poiret) Gould & Clark	Dichanthelium boscii (Poir.) Gould & C.A.Clark	2702587	EXACT	100	SYNONYM	SPECIES	Plantae	Tracheophyta	Liliopsida	Poales	Poaceae	Panicum	Panicum boscii	Panicum boscii Poir.
4	Dichanthelium clandestinum (L.) Gould	Dichanthelium clandestinum (L.) Gould	2702543	EXACT	100	SYNONYM	SPECIES	Plantae	Tracheophyta	Liliopsida	Poales	Poaceae	Panicum	Panicum clandestinum	Panicum clandestinum L.
4	Dichanthelium commutatum (Schult.) Gould	Dichanthelium commutatum (Schult.) Gould	2702603	EXACT	100	SYNONYM	SPECIES	Plantae	Tracheophyta	Liliopsida	Poales	Poaceae	Panicum	Panicum commutatum	Panicum commutatum Schult.
4	Dichanthelium depauperatum (Muhl.) Gould	Dichanthelium depauperatum (Muhl.) Gould	2702591	EXACT	100	SYNONYM	SPECIES	Plantae	Tracheophyta	Liliopsida	Poales	Poaceae	Panicum	Panicum depauperatum	Panicum depauperatum Muhl.
4	Dichanthelium dichotomum (L.) Gould var. dichotomum	Dichanthelium dichotomum var. dichotomum	7325366	EXACT	99	SYNONYM	VARIETY	Plantae	Tracheophyta	Liliopsida	Poales	Poaceae	Panicum	Panicum dichotomum	Panicum dichotomum L.
4	Dichanthelium dichotomum (L.) Gould var. ensifolium (Bal)	Dichanthelium dichotomum var. ensifolium (Baldwin ex Elliott) Gould & C.A.Clark	4134790	EXACT	97	SYNONYM	VARIETY	Plantae	Tracheophyta	Liliopsida	Poales	Poaceae	Panicum	Panicum ensifolium	Panicum ensifolium Baldwin ex Elliott
4	Dichanthelium erectifolium (Nash) Gould & Clark	Dichanthelium erectifolium (Nash) Gould & C.A.Clark	2702664	EXACT	100	SYNONYM	SPECIES	Plantae	Tracheophyta	Liliopsida	Poales	Poaceae	Panicum	Panicum erectifolium	Panicum erectifolium Nash
4	Dichanthelium laxiflorum (Lamarck) Gould	Dichanthelium laxiflorum (Lam.) Gould	2702596	EXACT	100	SYNONYM	SPECIES	Plantae	Tracheophyta	Liliopsida	Poales	Poaceae	Panicum	Panicum laxiflorum	Panicum laxiflorum Lam.
4	Dichanthelium sphaerocarpon (Elliot) Gould var. isophyllu	Dichanthelium sphaerocarpon var. isophyllum (Scribn.) Gould & C.A.Clark	4133543	FUZZY	96	SYNONYM	VARIETY	Plantae	Tracheophyta	Liliopsida	Poales	Poaceae	Panicum	Panicum polyanthes	Panicum polyanthes Schult.
4	Parthenocissus quinquefolia (L.) Planch.	Parthenocissus quinquefolia (L.) Planch.	3039194	EXACT	100	ACCEPTED	SPECIES	Plantae	Tracheophyta	Magnoliopsida	Vitales	Vitaceae	Parthenocissus	Parthenocissus quinquefolia	Parthenocissus quinquefolia (L.) Planch.
4	Paspalum dilatatum Poiret	Paspalum dilatatum Poir.	2705565	EXACT	100	ACCEPTED	SPECIES	Plantae	Tracheophyta	Liliopsida	Poales	Poaceae	Paspalum	Paspalum dilatatum	Paspalum dilatatum Poir.
4	Paspalum floridanum Michx.	Paspalum floridanum Michx.	2705642	EXACT	100	ACCEPTED	SPECIES	Plantae	Tracheophyta	Liliopsida	Poales	Poaceae	Paspalum	Paspalum floridanum	Paspalum floridanum Michx.
4	Paspalum urvillei Steud.	Paspalum urvillei Steud.	2705650	EXACT	100	ACCEPTED	SPECIES	Plantae	Tracheophyta	Liliopsida	Poales	Poaceae	Paspalum	Paspalum urvillei	Paspalum urvillei Steud.
4	Paulownia tomentosa (Thunberg) Steudel	Paulownia tomentosa Steud.	3170823	EXACT	100	ACCEPTED	SPECIES	Plantae	Tracheophyta	Magnoliopsida	Lamiales	Paulowniaceae	Paulownia	Paulownia tomentosa	Paulownia tomentosa Steud.
4	Peltandra virginica (L.) Kunth	Peltandra virginica Kunth	8179586	EXACT	100	DOUBTFUL	SPECIES	Plantae	Tracheophyta	Liliopsida	Alismatales	Araceae	Peltandra	Peltandra virginica	Peltandra virginica Schott
4	Penstomen australis Small	Penstemon australis Small	3171553	FUZZY	89	ACCEPTED	SPECIES	Plantae	Tracheophyta	Magnoliopsida	Lamiales	Plantaginaceae	Penstemon	Penstemon australis	Penstemon australis Small
4	Penthorum sedoides L.	Penthorum sedoides L.	2985709	EXACT	100	ACCEPTED	SPECIES	Plantae	Tracheophyta	Magnoliopsida	Saxifragales	Penthoraceae	Penthorum	Penthorum sedoides	Penthorum sedoides L.
4	Perilla frutescens. L. Britton	Perilla frutescens Britton.	5341394	EXACT	100	ACCEPTED	SPECIES	Plantae	Tracheophyta	Magnoliopsida	Lamiales	Lamiaceae	Perilla	Perilla frutescens	Perilla frutescens Britton.
4	Polygonum hydropiper L.	Polygonum hydropiper L.	7945761	EXACT	100	SYNONYM	SPECIES	Plantae	Tracheophyta	Magnoliopsida	Caryophyllales	Polygonaceae	Persicaria	Persicaria hydropiper	Persicaria hydropiper (L.) Spach
4	Polygonum hydropiperoides Michx. var. hydropiperoides	Polygonum hydropiperoides var. hydropiperoides	7128534	EXACT	99	SYNONYM	VARIETY	Plantae	Tracheophyta	Magnoliopsida	Caryophyllales	Polygonaceae	Persicaria	Persicaria hydropiperoides	Persicaria hydropiperoides Small
4	Polygonum caespitosum Blume var. longisetum (DeBruyn) Steward	Polygonum caespitosum var. longisetum (De Bruyn) Steward	5651844	EXACT	100	SYNONYM	VARIETY	Plantae	Tracheophyta	Magnoliopsida	Caryophyllales	Polygonaceae	Persicaria	Persicaria longiseta	Persicaria longiseta (Bruijn) Kitag.
4	Polygonum pensylvanicum L.	Polygonum pensylvanicum L.	5334366	EXACT	100	SYNONYM	SPECIES	Plantae	Tracheophyta	Magnoliopsida	Caryophyllales	Polygonaceae	Persicaria	Persicaria pensylvanica	Persicaria pensylvanica (L.) M.G√≥mez
4	Polygonum punctatum Ell.	Polygonum punctatum Ell.	5334330	EXACT	100	SYNONYM	SPECIES	Plantae	Tracheophyta	Magnoliopsida	Caryophyllales	Polygonaceae	Persicaria	Persicaria punctata	Persicaria punctata Small
4	Polygonum saggitatum L.	Polygonum sagittatum L.	5334307	FUZZY	100	SYNONYM	SPECIES	Plantae	Tracheophyta	Magnoliopsida	Caryophyllales	Polygonaceae	Persicaria	Persicaria sagittata	Persicaria sagittata (L.) H.Gross
4	Polygonum setaceum Baldw. ex Ell.	Polygonum setaceum Baldw. ex Ell.	8220871	EXACT	100	SYNONYM	SPECIES	Plantae	Tracheophyta	Magnoliopsida	Caryophyllales	Polygonaceae	Persicaria	Persicaria setacea	Persicaria setacea Small
4	Polygonum virginianum L.	Polygonum virginianum L.	5334466	EXACT	100	SYNONYM	SPECIES	Plantae	Tracheophyta	Magnoliopsida	Caryophyllales	Polygonaceae	Persicaria	Persicaria virginiana	Persicaria virginiana (L.) Gaertn.
4	Phacelia maculata Wood	Phacelia maculata Wood	2928060	EXACT	100	ACCEPTED	SPECIES	Plantae	Tracheophyta	Magnoliopsida	Boraginales	Hydrophyllaceae	Phacelia	Phacelia maculata	Phacelia maculata Wood
4	Thelypteris hexagonoptera (Mich.) Weatherby	Thelypteris hexagonoptera (Michx.) Weath.	5275217	EXACT	100	SYNONYM	SPECIES	Plantae	Tracheophyta	Polypodiopsida	Polypodiales	Thelypteridaceae	Phegopteris	Phegopteris hexagonoptera	Phegopteris hexagonoptera F√©e
4	Talinum teretifolium Pursh	Talinum teretifolium (Raf.) Pursh	3084690	EXACT	100	SYNONYM	SPECIES	Plantae	Tracheophyta	Magnoliopsida	Caryophyllales	Montiaceae	Phemeranthus	Phemeranthus teretifolius	Phemeranthus teretifolius Raf.
4	Philadelphus inodorus L.	Philadelphus inodorus L.	2986052	EXACT	100	ACCEPTED	SPECIES	Plantae	Tracheophyta	Magnoliopsida	Cornales	Hydrangeaceae	Philadelphus	Philadelphus inodorus	Philadelphus inodorus L.
4	Phlox amoena Sims	Phlox amoena Sims	2927711	EXACT	100	ACCEPTED	SPECIES	Plantae	Tracheophyta	Magnoliopsida	Ericales	Polemoniaceae	Phlox	Phlox amoena	Phlox amoena Sims
4	Phlox carolina L.	Phlox carolina L.	2927756	EXACT	100	ACCEPTED	SPECIES	Plantae	Tracheophyta	Magnoliopsida	Ericales	Polemoniaceae	Phlox	Phlox carolina	Phlox carolina L.
4	Phyrma leptostachya L.	Phyrma leptostachya L.	8843959	EXACT	100	ACCEPTED	SPECIES	Plantae	Tracheophyta	Magnoliopsida	Lamiales	Lamiaceae		Phyrma leptostachya	Phyrma leptostachya L.
4	Phytolacca americana L.	Phytolacca americana L.	3084015	EXACT	100	ACCEPTED	SPECIES	Plantae	Tracheophyta	Magnoliopsida	Caryophyllales	Phytolaccaceae	Phytolacca	Phytolacca americana	Phytolacca americana L.
4	Pilea pumila (L.) Gray	Pilea pumila A.Gray	5361818	EXACT	100	ACCEPTED	SPECIES	Plantae	Tracheophyta	Magnoliopsida	Rosales	Urticaceae	Pilea	Pilea pumila	Pilea pumila A.Gray
4	Hieracium venosum L.	Hieracium venosum L.	3135852	EXACT	100	SYNONYM	SPECIES	Plantae	Tracheophyta	Magnoliopsida	Asterales	Asteraceae	Pilosella	Pilosella venosa	Pilosella venosa F.W.Schultz & Sch.Bip.
4	Pinus echinata Miller	Pinus echinata Mill.	5285324	EXACT	100	ACCEPTED	SPECIES	Plantae	Tracheophyta	Pinopsida	Pinales	Pinaceae	Pinus	Pinus echinata	Pinus echinata Mill.
4	Pinus taeda L.	Pinus taeda L.	5285241	EXACT	100	ACCEPTED	SPECIES	Plantae	Tracheophyta	Pinopsida	Pinales	Pinaceae	Pinus	Pinus taeda	Pinus taeda L.
4	Stipa avenacea L.	Stipa avenacea L.	8018608	EXACT	100	SYNONYM	SPECIES	Plantae	Tracheophyta	Liliopsida	Poales	Poaceae	Piptochaetium	Piptochaetium avenaceum	Piptochaetium avenaceum (L.) Parodi
4	Pityopsis aspera (Shuttlew.) Small var. aspera	Pityopsis aspera var. aspera	6444721	EXACT	100	ACCEPTED	VARIETY	Plantae	Tracheophyta	Magnoliopsida	Asterales	Asteraceae	Pityopsis	Pityopsis aspera	Pityopsis aspera (A.Gray) Small
4	Plantago lanceolata L.	Plantago lanceolata L.	8208358	EXACT	100	ACCEPTED	SPECIES	Plantae	Tracheophyta	Magnoliopsida	Lamiales	Plantaginaceae	Plantago	Plantago lanceolata	Plantago lanceolata L.
4	Plantago rugelii Dene.	Plantago rugelii Decne.	3189781	EXACT	86	ACCEPTED	SPECIES	Plantae	Tracheophyta	Magnoliopsida	Lamiales	Plantaginaceae	Plantago	Plantago rugelii	Plantago rugelii Decne.
4	Plantago virginica L.	Plantago virginica L.	3189751	EXACT	100	ACCEPTED	SPECIES	Plantae	Tracheophyta	Magnoliopsida	Lamiales	Plantaginaceae	Plantago	Plantago virginica	Plantago virginica L.
4	Platanthera flava (L.) Leur.	Platanthera flava Lindl.	2798014	EXACT	88	ACCEPTED	SPECIES	Plantae	Tracheophyta	Liliopsida	Asparagales	Orchidaceae	Platanthera	Platanthera flava	Platanthera flava Lindl.
4	Platanthera lacera (Michx.) G. Don	Platanthera lacera (Michx.) G.Don	2798100	EXACT	100	ACCEPTED	SPECIES	Plantae	Tracheophyta	Liliopsida	Asparagales	Orchidaceae	Platanthera	Platanthera lacera	Platanthera lacera (Michx.) G.Don
4	Platanus occidentalis L.	Platanus occidentalis L.	3152820	EXACT	100	ACCEPTED	SPECIES	Plantae	Tracheophyta	Magnoliopsida	Proteales	Platanaceae	Platanus	Platanus occidentalis	Platanus occidentalis L.
4	Polypodium polypodioides L. Watt	Polypodium polypodioides (L.) Watt.	6389739	EXACT	100	SYNONYM	SPECIES	Plantae	Tracheophyta	Polypodiopsida	Polypodiales	Polypodiaceae	Pleopeltis	Pleopeltis polypodioides	Pleopeltis polypodioides (L.) E.G.Andrews & Windham
4	Pluchea camphorata (L.) DC.	Pluchea camphorata (L.) DC.	3132651	EXACT	100	ACCEPTED	SPECIES	Plantae	Tracheophyta	Magnoliopsida	Asterales	Asteraceae	Pluchea	Pluchea camphorata	Pluchea camphorata (L.) DC.
4	Poa annua L.	Poa annua L.	2704179	EXACT	100	ACCEPTED	SPECIES	Plantae	Tracheophyta	Liliopsida	Poales	Poaceae	Poa	Poa annua	Poa annua L.
4	Poa autumnalis Muhl. ex Ell.	Poa autumnalis Elliott	2704226	EXACT	100	ACCEPTED	SPECIES	Plantae	Tracheophyta	Liliopsida	Poales	Poaceae	Poa	Poa autumnalis	Poa autumnalis Elliott
4	Poa chapmaniana Scribner	Poa chapmaniana Scribn.	2704190	EXACT	100	ACCEPTED	SPECIES	Plantae	Tracheophyta	Liliopsida	Poales	Poaceae	Poa	Poa chapmaniana	Poa chapmaniana Scribn.
4	Podophyllum peltatum L.	Podophyllum peltatum L.	3033839	EXACT	100	ACCEPTED	SPECIES	Plantae	Tracheophyta	Magnoliopsida	Ranunculales	Berberidaceae	Podophyllum	Podophyllum peltatum	Podophyllum peltatum L.
4	Polygala polygama Walter	Polygala polygama Walter	3191425	EXACT	100	ACCEPTED	SPECIES	Plantae	Tracheophyta	Magnoliopsida	Fabales	Polygalaceae	Polygala	Polygala polygama	Polygala polygama Walter
4	Polygonatum biflorum (Walter) Ell.	Polygonatum biflorum Elliott	2770039	EXACT	100	ACCEPTED	SPECIES	Plantae	Tracheophyta	Liliopsida	Asparagales	Asparagaceae	Polygonatum	Polygonatum biflorum	Polygonatum biflorum Elliott
4	Polypremum procumbens L.	Polypremum procumbens L.	5415472	EXACT	100	ACCEPTED	SPECIES	Plantae	Tracheophyta	Magnoliopsida	Lamiales	Tetrachondraceae	Polypremum	Polypremum procumbens	Polypremum procumbens L.
4	Polystichum acrostichoides (Michaux) Shott	Polystichum acrostichoides (Michx.) Schott	2651098	EXACT	92	ACCEPTED	SPECIES	Plantae	Tracheophyta	Polypodiopsida	Polypodiales	Dryopteridaceae	Polystichum	Polystichum acrostichoides	Polystichum acrostichoides (Michx.) Schott
4	Populus deltoides Marshall	Populus deltoides W.Bartram ex Marshall	3040232	EXACT	100	ACCEPTED	SPECIES	Plantae	Tracheophyta	Magnoliopsida	Malpighiales	Salicaceae	Populus	Populus deltoides	Populus deltoides W.Bartram ex Marshall
4	Portulaca oleracea L.	Portulaca oleracea L.	3084719	EXACT	100	ACCEPTED	SPECIES	Plantae	Tracheophyta	Magnoliopsida	Caryophyllales	Portulacaceae	Portulaca	Portulaca oleracea	Portulaca oleracea L.
4	Potentilla canadensis L.	Potentilla canadensis L.	5368951	EXACT	100	ACCEPTED	SPECIES	Plantae	Tracheophyta	Magnoliopsida	Rosales	Rosaceae	Potentilla	Potentilla canadensis	Potentilla canadensis L.
4	Duchesnea indica (Andre.) Focke	Duchesnea indica (Andr.) Focke	3031919	EXACT	100	SYNONYM	SPECIES	Plantae	Tracheophyta	Magnoliopsida	Rosales	Rosaceae	Potentilla	Potentilla indica	Potentilla indica (Andrews) T.Wolf
4	Potentilla recta L.	Potentilla recta L.	5367294	EXACT	100	ACCEPTED	SPECIES	Plantae	Tracheophyta	Magnoliopsida	Rosales	Rosaceae	Potentilla	Potentilla recta	Potentilla recta L.
4	Potentilla simplex Michaux	Potentilla simplex Michx.	5368059	EXACT	100	ACCEPTED	SPECIES	Plantae	Tracheophyta	Magnoliopsida	Rosales	Rosaceae	Potentilla	Potentilla simplex	Potentilla simplex Michx.
4	Prunus americana Marshall	Prunus americana Marshall	3021106	EXACT	100	ACCEPTED	SPECIES	Plantae	Tracheophyta	Magnoliopsida	Rosales	Rosaceae	Prunus	Prunus americana	Prunus americana Marshall
4	Prunus angustifolia Marshall	Prunus angustifolia Marshall	3021368	EXACT	100	ACCEPTED	SPECIES	Plantae	Tracheophyta	Magnoliopsida	Rosales	Rosaceae	Prunus	Prunus angustifolia	Prunus angustifolia Marshall
4	Prunus persica (L.) Batsch W	Prunus persica (L.) Batsch	3022511	EXACT	100	SYNONYM	SPECIES	Plantae	Tracheophyta	Magnoliopsida	Rosales	Rosaceae	Prunus	Prunus persica	Prunus persica Stokes
4	Prunus serotina Ehrhart	Prunus serotina Ehrh.	3021850	EXACT	100	ACCEPTED	SPECIES	Plantae	Tracheophyta	Magnoliopsida	Rosales	Rosaceae	Prunus	Prunus serotina	Prunus serotina Ehrh.
4	Prunus umbellata Ell.	Prunus umbellata Elliott	3022674	EXACT	100	ACCEPTED	SPECIES	Plantae	Tracheophyta	Magnoliopsida	Rosales	Rosaceae	Prunus	Prunus umbellata	Prunus umbellata Elliott
4	Gnaphalium obtusifolium L.	Gnaphalium obtusifolium L.	5390165	EXACT	100	SYNONYM	SPECIES	Plantae	Tracheophyta	Magnoliopsida	Asterales	Asteraceae	Pseudognaphalium	Pseudognaphalium obtusifolium	Pseudognaphalium obtusifolium (L.) Hilliard & B.L.Burtt
4	Pteridium aquilinum (Miller) K. Koch.	Pteridium aquilinum	10050318	EXACT	98	DOUBTFUL	SPECIES	Plantae	Tracheophyta	Polypodiopsida	Polypodiales	Dennstaedtiaceae	Pteridium	Pteridium aquilinum	Pteridium aquilinum (L.) Kuhn
4	Ptilmnium capillaceum (Michaux) Raf.	Ptilimnium capillaceum Raf.	8184378	FUZZY	94	ACCEPTED	SPECIES	Plantae	Tracheophyta	Magnoliopsida	Apiales	Apiaceae	Ptilimnium	Ptilimnium capillaceum	Ptilimnium capillaceum Raf.
4	Pueraria lobata (Willd.) Ohwi	Pueraria lobata (Willd.) Ohwi	2977654	EXACT	100	SYNONYM	SPECIES	Plantae	Tracheophyta	Magnoliopsida	Fabales	Fabaceae	Pueraria	Pueraria montana	Pueraria montana (Lour.) Merr.
4	Pycnanthemum incanum (L.) Michx.	Pycnanthemum incanum (L.) Michx.	2927354	EXACT	100	ACCEPTED	SPECIES	Plantae	Tracheophyta	Magnoliopsida	Lamiales	Lamiaceae	Pycnanthemum	Pycnanthemum incanum	Pycnanthemum incanum (L.) Michx.
4	Pyrrhopappus carolinianus (Walter) DC. var. carolinia	Pyrrhopappus carolinianus var. carolinianus	4273417	FUZZY	95	SYNONYM	VARIETY	Plantae	Tracheophyta	Magnoliopsida	Asterales	Asteraceae	Pyrrhopappus	Pyrrhopappus carolinianus	Pyrrhopappus carolinianus DC.
4	Quercus alba L.	Quercus alba L.	2879737	EXACT	100	ACCEPTED	SPECIES	Plantae	Tracheophyta	Magnoliopsida	Fagales	Fagaceae	Quercus	Quercus alba	Quercus alba L.
4	Quercus coccinea Muenchh	Quercus coccinea M√ºnchh.	8326061	EXACT	100	ACCEPTED	SPECIES	Plantae	Tracheophyta	Magnoliopsida	Fagales	Fagaceae	Quercus	Quercus coccinea	Quercus coccinea M√ºnchh.
4	Quercus falcata Michx. var. falcata	Quercus falcata var. falcata	7274410	EXACT	99	SYNONYM	VARIETY	Plantae	Tracheophyta	Magnoliopsida	Fagales	Fagaceae	Quercus	Quercus falcata	Quercus falcata Michx.
4	Quercus marilandica Muenchh	Quercus marilandica M√ºnchh.	2881630	EXACT	100	ACCEPTED	SPECIES	Plantae	Tracheophyta	Magnoliopsida	Fagales	Fagaceae	Quercus	Quercus marilandica	Quercus marilandica M√ºnchh.
4	Quercus michauxii Nuttall	Quercus michauxii Nutt.	2880340	EXACT	100	ACCEPTED	SPECIES	Plantae	Tracheophyta	Magnoliopsida	Fagales	Fagaceae	Quercus	Quercus michauxii	Quercus michauxii Nutt.
4	Quercus nigra L.	Quercus nigra L.	2879328	EXACT	100	ACCEPTED	SPECIES	Plantae	Tracheophyta	Magnoliopsida	Fagales	Fagaceae	Quercus	Quercus nigra	Quercus nigra L.
4	Quercus prinoides Willd.	Quercus prinoides Willd.	2879759	EXACT	100	ACCEPTED	SPECIES	Plantae	Tracheophyta	Magnoliopsida	Fagales	Fagaceae	Quercus	Quercus prinoides	Quercus prinoides Willd.
4	Quercus rubra L.	Quercus rubra L.	2880539	EXACT	100	ACCEPTED	SPECIES	Plantae	Tracheophyta	Magnoliopsida	Fagales	Fagaceae	Quercus	Quercus rubra	Quercus rubra L.
4	Quercus stellata Wang.	Quercus stellata Wangenh.	8879961	EXACT	100	ACCEPTED	SPECIES	Plantae	Tracheophyta	Magnoliopsida	Fagales	Fagaceae	Quercus	Quercus stellata	Quercus stellata Wangenh.
4	Ranunculus abortivus L.	Ranunculus abortivus L.	3033412	EXACT	100	ACCEPTED	SPECIES	Plantae	Tracheophyta	Magnoliopsida	Ranunculales	Ranunculaceae	Ranunculus	Ranunculus abortivus	Ranunculus abortivus L.
4	Ranunculus carolinianus D.C.	Ranunculus carolinianus DC.	6374625	EXACT	83	SYNONYM	SPECIES	Plantae	Tracheophyta	Magnoliopsida	Ranunculales	Ranunculaceae	Ranunculus	Ranunculus hispidus	Ranunculus hispidus Michx.
[truncated: 10,531 more rows]
